# Supplementary material
Source: PubMed Central journal article supplement (PMC8242367)
Supplement: JMV-93-5523-s001.pdf [file JMV-93-5523-s001.pdf]

We gratefully acknowledge the following Authors from the Originating laboratories responsible for obtaining the specimens, as well as the Submitting laboratories where the genome data were generated and shared via GISAID, on which this research is based.

All Submitters of data may be contacted directly via [www.gisaid.org](http://www.gisaid.org)

Authors are sorted alphabetically.

| Accession ID                                                                                                                                                                                                                   | Originating Laboratory                                                                                                                                                                                                                                                                                                                                                                                                                                                                        | Submitting Laboratory                                                                                                                                                                                                                                                                                                                                                    | Authors                                                                                                                                                                                                                                                                                                                                                                                                                                                                                                                                                                                                                                                                                                                                                                                                                                                                                                                                                                                           |
|--------------------------------------------------------------------------------------------------------------------------------------------------------------------------------------------------------------------------------|-----------------------------------------------------------------------------------------------------------------------------------------------------------------------------------------------------------------------------------------------------------------------------------------------------------------------------------------------------------------------------------------------------------------------------------------------------------------------------------------------|--------------------------------------------------------------------------------------------------------------------------------------------------------------------------------------------------------------------------------------------------------------------------------------------------------------------------------------------------------------------------|---------------------------------------------------------------------------------------------------------------------------------------------------------------------------------------------------------------------------------------------------------------------------------------------------------------------------------------------------------------------------------------------------------------------------------------------------------------------------------------------------------------------------------------------------------------------------------------------------------------------------------------------------------------------------------------------------------------------------------------------------------------------------------------------------------------------------------------------------------------------------------------------------------------------------------------------------------------------------------------------------|
| EPI_ISL_1081958, EPI_ISL_1081961, EPI_ISL_1082294                                                                                                                                                                              | "Stefan S. Nicolau" Institute of Virology                                                                                                                                                                                                                                                                                                                                                                                                                                                     | "Stefan S. Nicolau" Institute of Virology                                                                                                                                                                                                                                                                                                                                | Adriana Plesa; Alina Nastasie; Ana Iulia Neagu; Anca Botezatu; Camelia Sultana; Carmen Cristina Diaconu; Coralia Bleotu; Cristina Mambet; Denisa Dragu; Gabriela Anton; Ioana Pitica; Iulia Virginia Iancu; Laura Grecu; Laura Necula; Lilia Matei; Marinela Bostan; Mihaela Economescu; Mirela Mihaila; Saviana Nedeianu; Simona Ruta                                                                                                                                                                                                                                                                                                                                                                                                                                                                                                                                                                                                                                                            |
| EPI_ISL_632310                                                                                                                                                                                                                 | 1-Laboratory of Microbiology, National Reference Lab, Charles Nicolle Hospital; 2-University of Tunis ElManar, Faculty of Medicine of Tunis, LR99ES09, Tunis, Tunisia                                                                                                                                                                                                                                                                                                                         | 1-Clinical and Experimental Pharmacology Lab, LR16SP02, National Center of Pharmacovigilance, University of Tunis El Manar, Tunis, Tunisia. 2-Neurodegenerative diseases and psychiatric troubles, LR18SP03, Razi Hospital, University of Tunis El Manar, Tunis, Tunisia. 3- Ministry of Health, National Observatory of New and Emerging Diseases, 1006, Tunis, Tunisia | Alia Ben Kahla; Gaies Emna; Ilhem Boutiba-Ben Boubaker; Imen Kacem; Imen Mkada; Jailla Ben Khellil; Maher Kharrat; Mouna Ben Sassi; Mouna Safer; Nissaf Ben Alaya; Riadh Daghfous; Riadh Gouider.; Salma Abid; Sameh Trabelsi; Sana Ferjani; Soumaya Rammeh                                                                                                                                                                                                                                                                                                                                                                                                                                                                                                                                                                                                                                                                                                                                       |
| EPI_ISL_634977, EPI_ISL_635059, EPI_ISL_635060, EPI_ISL_635061, EPI_ISL_635062, EPI_ISL_707700, EPI_ISL_733499, EPI_ISL_733500, EPI_ISL_763065, EPI_ISL_763067, EPI_ISL_794735, EPI_ISL_794736, EPI_ISL_794737, EPI_ISL_794738 | see above                                                                                                                                                                                                                                                                                                                                                                                                                                                                                     | 1-Clinical and Experimental Pharmacology Lab, LR16SP02, National Center of Pharmacovigilance, University of Tunis El Manar, Tunis, Tunisia. 2-Neurodegenerative diseases and psychiatric troubles, LR18SP03, Razi Hospital, University of Tunis El Manar, Tunis, Tunisia. 3- Ministry of Health, National Observatory of New and Emerging Diseases, 1006, Tunis, Tunisia | Alia Ben Kahla; Alia BenKahla; Asma Ferjani; Awatef El MOussi; Awatef El Moussi; Gaies Emna; Guedi Ali Barreh; Habiba Ben Romdhane; Hanen El Jebari; Ilhem Boutiba-Ben Boubaker; Imen Kacem; Imen Mkada; Ines Mdingi; Jailla Ben Khellil; Maher Kharrat; Mouna Ben Sassi; Mouna Safer; Nissaf Ben Alaya; Riadh Daghfous; Riadh Gouider.; Rouaa Ben Othman; Salma Abid; Sameh Trabelsi; Sana Ferjani; Sarra Chamman; Souissi Amira; Soumaya Rammeh; Zaineb Hamzaoui                                                                                                                                                                                                                                                                                                                                                                                                                                                                                                                                |
| EPI_ISL_882703, EPI_ISL_954212, EPI_ISL_1013523, EPI_ISL_1013565                                                                                                                                                               | 1.AO Universitaria 'S. Giovanni di Dio e Ruggi D'Aragona, Scuola Medica Salernitana' Hospital / 2.UOC di Virologia e Microbiologia, Università della Campania 'L. Vanvitelli' / 3.AO Universitaria 'Federico II' Napoli Hospital / 4.AORN 'San Giuseppe Moscati' Avellino Hospital / 5.AO 'San Pio - presidio G. Rummo' Benevento Hospital / 6.AO 'Sant'Anna e San Sebastiano' Caserta Hospital / 7.PO 'Maria Santissima Addolorata' Eboli Hospital / 8.Biogem Istituto di Ricerche Genetiche | 1. Genome Research Center for Health (CRGS) / 2. Laboratory of Molecular Medicine and Genomics (LMMGE) / 3. Center for Research in Pure and Applied Mathematics (CRMPA)                                                                                                                                                                                                  | Alessandro Weisz; Alessia Cossu; Andreina Baj; Aniello Gentile; Annamaria Salvati; Antonello Saccomanno; Arnolfo Petruzzello; Assunta Sellitto; Carlo Ferravante; Domenico Memoli; Domenico Palumbo; Edmondo Adorisio; Elena Alexandrova; Emilia Vaccaro; Fausto Sessa.; Francesca Marciano; Francesca Rizzo; Francesco Curcio; Gianluigi Franci; Giorgio Dirani; Giorgio Giurato; Giovanni Nassa; Giovanni Pecoraro; Giuseppe Fenza; Giuseppe Portella; Gregorio Goffredi; Ilaria Terenzi; Jessica Lambert; Maddalena Schioppa; Maria Grazia Foti; Maria Landi; Marianna Scrima; Mariarosaria Ingino; Massimiliano Galdiero; Maurizio Fumi; Michela Iacobellis; Michele Caraglia; Michele Cennamo; Morena D'Avenia; Oriana Strianese; Pasquale Pagliano; Rita Greco; Roberta Tarallo; Rosanna Piluscio; Silvia Zanolli; Simona Sempri; Sonia Amabile; Stefania Marziotto; Teresa Rocco; Valeria Mirici Cappa; Vincenzo Rocco; Viola Melone; Vittoria Letizia; Vittorio Sambri; Ylenia D'Agostino |
| EPI_ISL_806726                                                                                                                                                                                                                 | 4Cyte Pathology                                                                                                                                                                                                                                                                                                                                                                                                                                                                               | NSW Health Pathology - Institute of Clinical Pathology and Medical Research; Westmead Hospital; University of Sydney                                                                                                                                                                                                                                                     | CIDM-PH et al.                                                                                                                                                                                                                                                                                                                                                                                                                                                                                                                                                                                                                                                                                                                                                                                                                                                                                                                                                                                    |
| EPI_ISL_729424, EPI_ISL_729459                                                                                                                                                                                                 | A. Krumbholz, Labor Dr. Krause und Kollegen MVZ GmbH, Kiel                                                                                                                                                                                                                                                                                                                                                                                                                                    | Charité Universitätsmedizin Berlin, Institut für Virologie                                                                                                                                                                                                                                                                                                               | Barbara Mühlemann; Christian Drosten; Julia Schneider; Jörn Beheim-Schwarzbach; Talitha Veith; Terry Jones; Victor M Corman                                                                                                                                                                                                                                                                                                                                                                                                                                                                                                                                                                                                                                                                                                                                                                                                                                                                       |
| EPI_ISL_1008534                                                                                                                                                                                                                | A05 diagnostics                                                                                                                                                                                                                                                                                                                                                                                                                                                                               | The Public Health Agency of Sweden                                                                                                                                                                                                                                                                                                                                       | Anna Risberg; Anna-Malin Linde; Carlo Berg; Karin Tegmark-Wisell; Maria Lind Karlberg; Mattias Haukland; Mia Brytting; Noura Walai; Oskar Karlsson Lindsjö; Petra Edquist; Petra Holmstrom; Reza Advani; Sofia Stamouli                                                                                                                                                                                                                                                                                                                                                                                                                                                                                                                                                                                                                                                                                                                                                                           |
| EPI_ISL_498534, EPI_ISL_498535, EPI_ISL_498543, EPI_ISL_735503                                                                                                                                                                 | ACT Pathology                                                                                                                                                                                                                                                                                                                                                                                                                                                                                 | Schwessinger Lab                                                                                                                                                                                                                                                                                                                                                         | Ashley Jones; Benjamin Schwessinger; Craig Kennedy; Karina Kennedy; Kevin Murray; Megan McDonald; Ming-Dao Chia; Robert Lanfear; Robyn N Hall                                                                                                                                                                                                                                                                                                                                                                                                                                                                                                                                                                                                                                                                                                                                                                                                                                                     |
| EPI_ISL_768757, EPI_ISL_768786                                                                                                                                                                                                 | AIID                                                                                                                                                                                                                                                                                                                                                                                                                                                                                          | Irish Coronavirus Sequencing Consortium - National Virus Reference Laboratory                                                                                                                                                                                                                                                                                            | Alejandro Abner Garcia Leon; Gabriel Gonzalez; Michael Carr; Patrick Mallon                                                                                                                                                                                                                                                                                                                                                                                                                                                                                                                                                                                                                                                                                                                                                                                                                                                                                                                       |
| EPI_ISL_910329                                                                                                                                                                                                                 | ALEA dr Kandic                                                                                                                                                                                                                                                                                                                                                                                                                                                                                | Alea Genetic Centre                                                                                                                                                                                                                                                                                                                                                      | Dino Pecar; Lana Salihefendic; Rijad Konjodzic                                                                                                                                                                                                                                                                                                                                                                                                                                                                                                                                                                                                                                                                                                                                                                                                                                                                                                                                                    |
| EPI_ISL_458150                                                                                                                                                                                                                 | ANOUAL                                                                                                                                                                                                                                                                                                                                                                                                                                                                                        | ANOUAL                                                                                                                                                                                                                                                                                                                                                                   | Azami Nawfel; Benhida Rachid; Chenaoui Mohamed; El Aliani Aissam; El Ansari Fatima Zahra; Fekkak Jamal; Jouali Farah; Kasmi Yassine; Kitane Driss Lahlou; Loukman Salma; Marchoudi Nabila                                                                                                                                                                                                                                                                                                                                                                                                                                                                                                                                                                                                                                                                                                                                                                                                         |
| EPI_ISL_903639                                                                                                                                                                                                                 | AR Dept. of Health-Public Health Lab                                                                                                                                                                                                                                                                                                                                                                                                                                                          | Genomics and Discovery, Respiratory Viruses Branch, Division of Viral Diseases, Centers for Disease Control and Prevention                                                                                                                                                                                                                                               | Anna Montmayeur; Anna Uehara; Ben L. Rambo-Martin; Clinton R. Paden; Dhvani Batra; Haibin Wang; Jasmine Padilla; Jing Zhang; Justin Lee; Krista Queen; Lori Rowe; Mark Burroughs; Mili Sheth; Peter W. Cook; Rachel Marine; Sarah Nobles; Suxiang Tong; Yan Li; Ying Tao                                                                                                                                                                                                                                                                                                                                                                                                                                                                                                                                                                                                                                                                                                                          |
| EPI_ISL_527632                                                                                                                                                                                                                 | AR Dept. of Health-Public Health Lab                                                                                                                                                                                                                                                                                                                                                                                                                                                          | Pathogen Discovery, Respiratory Viruses Branch, Division of Viral Diseases, Centers for Disease Control and Prevention                                                                                                                                                                                                                                                   | Anna Uehara; Clinton Paden; Haibin Wang; Jing Zhang; Krista Queen; Suxiang Tong; Yan Li; Ying Tao                                                                                                                                                                                                                                                                                                                                                                                                                                                                                                                                                                                                                                                                                                                                                                                                                                                                                                 |
| EPI_ISL_1095250                                                                                                                                                                                                                | AR Dept. of Health-Public Health Lab                                                                                                                                                                                                                                                                                                                                                                                                                                                          | Respiratory Viruses Branch, Division of Viral Diseases, Centers for Disease Control and Prevention                                                                                                                                                                                                                                                                       | Anna Montmayeur; Anna Uehara; Ben L. Rambo-Martin; Clinton R. Paden; Dhvani Batra; Haibin Wang; Jasmine Padilla; Jing Zhang; Justin Lee; Krista Queen; Lori Rowe; Mark Burroughs; Mili Sheth; Peter W. Cook; Rachel Marine; Sarah Nobles; Suxiang Tong; Yan Li; Ying Tao                                                                                                                                                                                                                                                                                                                                                                                                                                                                                                                                                                                                                                                                                                                          |
| EPI_ISL_914794, EPI_ISL_1067610                                                                                                                                                                                                | AREA DE SALUD BUENOS AIRES                                                                                                                                                                                                                                                                                                                                                                                                                                                                    | Incienza, Instituto Costarricense de Investigación y Enseñanza en Nutrición y Salud                                                                                                                                                                                                                                                                                      | Adriana Godínez; Claudio Soto-Garita; Estela Cordero; Francisco Duarte; Hebleen Porras; Melany Calderón & Mariel López; Melany Calderón & Mónica Charpentier-Artavia                                                                                                                                                                                                                                                                                                                                                                                                                                                                                                                                                                                                                                                                                                                                                                                                                              |
| EPI_ISL_914830                                                                                                                                                                                                                 | AREA DE SALUD CARRILLO                                                                                                                                                                                                                                                                                                                                                                                                                                                                        | Incienza, Instituto Costarricense de Investigación y Enseñanza en Nutrición y Salud                                                                                                                                                                                                                                                                                      | Adriana Godínez; Claudio Soto-Garita; Estela Cordero; Francisco Duarte; Hebleen Porras; Melany Calderón & Adriana Bermúdez-Espinoza                                                                                                                                                                                                                                                                                                                                                                                                                                                                                                                                                                                                                                                                                                                                                                                                                                                               |
| EPI_ISL_914798                                                                                                                                                                                                                 | AREA DE SALUD CARTAGO                                                                                                                                                                                                                                                                                                                                                                                                                                                                         | Incienza, Instituto Costarricense de Investigación y Enseñanza en Nutrición y Salud                                                                                                                                                                                                                                                                                      | Adriana Godínez; Claudio Soto-Garita; Estela Cordero; Francisco Duarte; Hebleen Porras; Melany Calderón & Mariel López                                                                                                                                                                                                                                                                                                                                                                                                                                                                                                                                                                                                                                                                                                                                                                                                                                                                            |
| EPI_ISL_1067616                                                                                                                                                                                                                | AREA DE SALUD GOICOECHEA 2 - CLINICA DR. JIMENEZ NUÑEZ                                                                                                                                                                                                                                                                                                                                                                                                                                        | Incienza, Instituto Costarricense de Investigación y Enseñanza en Nutrición y Salud                                                                                                                                                                                                                                                                                      | Adriana Godínez; Claudio Soto-Garita; Estela Cordero; Francisco Duarte; Hebleen Porras; Melany Calderón & Mariel López                                                                                                                                                                                                                                                                                                                                                                                                                                                                                                                                                                                                                                                                                                                                                                                                                                                                            |
| EPI_ISL_1067605                                                                                                                                                                                                                | AREA DE SALUD HATILLO - CLINICA DR. SOLON NUÑEZ                                                                                                                                                                                                                                                                                                                                                                                                                                               | Incienza, Instituto Costarricense de Investigación y Enseñanza en Nutrición y Salud                                                                                                                                                                                                                                                                                      | Adriana Godínez; Claudio Soto-Garita; Estela Cordero; Francisco Duarte; Hebleen Porras; Melany Calderón & Daniel Cascante-Serrano                                                                                                                                                                                                                                                                                                                                                                                                                                                                                                                                                                                                                                                                                                                                                                                                                                                                 |
| EPI_ISL_1067619                                                                                                                                                                                                                | AREA DE SALUD MATA REDONDA-HOSPITAL - CLINICA DR. MORENO CAÑAS [SAN JOSE/SAN JOSE]                                                                                                                                                                                                                                                                                                                                                                                                            | Incienza, Instituto Costarricense de Investigación y Enseñanza en Nutrición y Salud                                                                                                                                                                                                                                                                                      | Adriana Godínez; Caterina Guzmán; Claudio Soto-Garita; Estela Cordero; Francisco Duarte; Hebleen Porras; Melany Calderón; Nazareth Ruiz & Nicole Vargas-Viquez                                                                                                                                                                                                                                                                                                                                                                                                                                                                                                                                                                                                                                                                                                                                                                                                                                    |
| EPI_ISL_914825                                                                                                                                                                                                                 | AREA DE SALUD MORAVIA                                                                                                                                                                                                                                                                                                                                                                                                                                                                         | Incienza, Instituto Costarricense de Investigación y Enseñanza en Nutrición y Salud                                                                                                                                                                                                                                                                                      | Adriana Godínez; Claudio Soto-Garita; Estela Cordero; Francisco Duarte; Hebleen Porras; Melany Calderón & Mariel López                                                                                                                                                                                                                                                                                                                                                                                                                                                                                                                                                                                                                                                                                                                                                                                                                                                                            |
| EPI_ISL_1067622                                                                                                                                                                                                                | AREA DE SALUD PAVAS (COOPESALUD)                                                                                                                                                                                                                                                                                                                                                                                                                                                              | Incienza, Instituto Costarricense de Investigación y Enseñanza en Nutrición y Salud                                                                                                                                                                                                                                                                                      | Adriana Godínez; Caterina Guzmán; Claudio Soto-Garita; Estela Cordero; Francisco Duarte; Hebleen Porras; Melany Calderón; Nazareth Ruiz & Melissa Carazo-Gutiérrez                                                                                                                                                                                                                                                                                                                                                                                                                                                                                                                                                                                                                                                                                                                                                                                                                                |
| EPI_ISL_914810                                                                                                                                                                                                                 | AREA DE SALUD SAN JUAN-SAN DIEGO-CONCEPCION 2                                                                                                                                                                                                                                                                                                                                                                                                                                                 | Incienza, Instituto Costarricense de Investigación y Enseñanza                                                                                                                                                                                                                                                                                                           | Adriana Godínez; Claudio Soto-Garita; Estela Cordero; Francisco Duarte; Hebleen Porras; Melany Calderón & Mariel López                                                                                                                                                                                                                                                                                                                                                                                                                                                                                                                                                                                                                                                                                                                                                                                                                                                                            |

|                                                                                                                                                                                                |                                                                                                     |                                                                                                                                   |                                                                                                                                                                                                                                                                                                                                                                                                                                                                               |                                                                                                                                                                                                                                                                                                                                                                                                                                                                                                                                                                                                                                                                       |
|------------------------------------------------------------------------------------------------------------------------------------------------------------------------------------------------|-----------------------------------------------------------------------------------------------------|-----------------------------------------------------------------------------------------------------------------------------------|-------------------------------------------------------------------------------------------------------------------------------------------------------------------------------------------------------------------------------------------------------------------------------------------------------------------------------------------------------------------------------------------------------------------------------------------------------------------------------|-----------------------------------------------------------------------------------------------------------------------------------------------------------------------------------------------------------------------------------------------------------------------------------------------------------------------------------------------------------------------------------------------------------------------------------------------------------------------------------------------------------------------------------------------------------------------------------------------------------------------------------------------------------------------|
|                                                                                                                                                                                                |                                                                                                     | en Nutrición y Salud                                                                                                              |                                                                                                                                                                                                                                                                                                                                                                                                                                                                               |                                                                                                                                                                                                                                                                                                                                                                                                                                                                                                                                                                                                                                                                       |
| EPI_ISL_1067599                                                                                                                                                                                | AREA DE SALUD TURRIALBA-JIMENEZ                                                                     | Incienza, Instituto Costarricense de Investigación y Enseñanza en Nutrición y Salud                                               | Adriana Godínez; Claudio Soto-Garita; Estela Cordero; Francisco Duarte; Hebleen Porras; Melany Calderón & Mónica Charpentier-Artavia                                                                                                                                                                                                                                                                                                                                          |                                                                                                                                                                                                                                                                                                                                                                                                                                                                                                                                                                                                                                                                       |
| EPI_ISL_695838                                                                                                                                                                                 | AZ SPHL, Arizona Department of Health Services                                                      | TGen North                                                                                                                        | Ashlyn Pfeiffer; Chris French; Darrin Lemmer; Dave Engelthaler; Hayley Yaglom; Jolene Bowers; Megan Folkerts; The Arizona COVID Genomics Union (ACGU)                                                                                                                                                                                                                                                                                                                         |                                                                                                                                                                                                                                                                                                                                                                                                                                                                                                                                                                                                                                                                       |
| EPI_ISL_1123293, EPI_ISL_1133119                                                                                                                                                               | Abdul Malek Ukil Medical College, Noakhali                                                          | Central Biological Research Laboratory and Department of Biochemistry and Molecular Biology                                       | H. M. Abdullah Al Masud; Imam Hossen; Md. Arif Hossain; Md. Imranul Hoq; Md. Khondakar Raziur Rahman; Md. Omer Faruq; Mohammad Omar Faruque; Rubil Hasan Bhuiyan; Sajib Rudra; Shanta Paul                                                                                                                                                                                                                                                                                    |                                                                                                                                                                                                                                                                                                                                                                                                                                                                                                                                                                                                                                                                       |
| EPI_ISL_517616, EPI_ISL_517623, EPI_ISL_517635, EPI_ISL_518800, EPI_ISL_518804, EPI_ISL_518805, EPI_ISL_518807, EPI_ISL_518815                                                                 | see above                                                                                           | Erasmus Medical Center                                                                                                            | Bas Oude Munnink; Dion Gajadin; Ed Ijzerman; Emmanuelle Munger; Gary Gummels; Ingrid Krishnadath; Lycke Woittiez; Marion Koopmans; Mireille Van de Veer; Princes Wongsowidjajo; Radjesh Ori; Rohma Banwari; Stephen Vredon                                                                                                                                                                                                                                                    |                                                                                                                                                                                                                                                                                                                                                                                                                                                                                                                                                                                                                                                                       |
| EPI_ISL_1110529, EPI_ISL_1118645                                                                                                                                                               | Akershus University Hospital, Department for Microbiology and Infectious Disease Control            | Norwegian Institute of Public Health, Department of Virology                                                                      | Atiya R Ali; Debech Nadia; Engebretsen Serina Beate; Garcia Lorente Ignacio; Hilde Elshaug; Hilde Vollan; Kamilla Heddeland Instefjord; Karoline Bragstad; Kathrine Stene-Johansen; Marie Paulsen Madsen; Olav Hungnes; Pedersen Benedikte Nevjen; Rasmus Riis Kopperud                                                                                                                                                                                                       |                                                                                                                                                                                                                                                                                                                                                                                                                                                                                                                                                                                                                                                                       |
| EPI_ISL_739659, EPI_ISL_739660, EPI_ISL_739661                                                                                                                                                 | Al-Quds Nutrition and Health Research Institute, Al-Quds University                                 | Al-Quds Nutrition and Health Research Institute, Al-Quds University                                                               | Al-Jawabreh, A.; Ereqat, S.; Nasereddin, A.; Rishmawi, C.                                                                                                                                                                                                                                                                                                                                                                                                                     |                                                                                                                                                                                                                                                                                                                                                                                                                                                                                                                                                                                                                                                                       |
| EPI_ISL_649153, EPI_ISL_661272                                                                                                                                                                 | Al-Quds Nutrition and Health Research Institute, Al-Quds University                                 | Al-Quds Nutrition and Health Research Institute, Al-Quds University                                                               | A. and Al-Jawabreh, A.; Ereqat, S.; Nasereddin, A.; S. and Al-Jawabreh, A.                                                                                                                                                                                                                                                                                                                                                                                                    |                                                                                                                                                                                                                                                                                                                                                                                                                                                                                                                                                                                                                                                                       |
| EPI_ISL_738896                                                                                                                                                                                 | Alameda County Public Health Lab                                                                    | Chan-Zuckerberg Biohub                                                                                                            | CZB Cliahub Consortium                                                                                                                                                                                                                                                                                                                                                                                                                                                        |                                                                                                                                                                                                                                                                                                                                                                                                                                                                                                                                                                                                                                                                       |
| EPI_ISL_528515, EPI_ISL_806839, EPI_ISL_911697, EPI_ISL_1049506, EPI_ISL_1061281, EPI_ISL_1061308                                                                                              | Alaska State Virology Laboratory                                                                    | Alaska State Virology Laboratory                                                                                                  | Bortz E; Chen J et al with Pathogenomics group Dagdag R; Devin M. Drown; Drown DM; George W; Jack Chen; Kovalenko A; Lisa Smith; Milton E; Ph.D.; Redlinger M; Stephanie DeRonde                                                                                                                                                                                                                                                                                              |                                                                                                                                                                                                                                                                                                                                                                                                                                                                                                                                                                                                                                                                       |
| EPI_ISL_805990                                                                                                                                                                                 | Alberta Precision Labs (APL)                                                                        | Alberta Precision Labs (APL)                                                                                                      | Berenger B; Bernier F; Chui L; Croxen M; Gordon P; Kellner J; Lam LG; Li V; Ma R; Melin A; Pabbaraju K; Tipples G; Wong A; Zelyas N                                                                                                                                                                                                                                                                                                                                           |                                                                                                                                                                                                                                                                                                                                                                                                                                                                                                                                                                                                                                                                       |
| EPI_ISL_528710                                                                                                                                                                                 | Alsafar - Khalifa University Abu Dhabi                                                              | Alsafar - Khalifa University Abu Dhabi                                                                                            | Andreas Henschel; Ernesto Damiani; Gihan Daw Elbait; Guan Tay; Habiba Alsafar; Rifat Hamoudi; Samuel Feng                                                                                                                                                                                                                                                                                                                                                                     |                                                                                                                                                                                                                                                                                                                                                                                                                                                                                                                                                                                                                                                                       |
| EPI_ISL_1009194, EPI_ISL_1009204, EPI_ISL_1009205                                                                                                                                              | American Esoteric Laboratories                                                                      | Colleen B. Jonsson                                                                                                                | Colleen B. Jonsson; Jyothi Parvathareddy; Mariah K. Taylor; Walter Reichard                                                                                                                                                                                                                                                                                                                                                                                                   |                                                                                                                                                                                                                                                                                                                                                                                                                                                                                                                                                                                                                                                                       |
| EPI_ISL_955323                                                                                                                                                                                 | American Esoteric Laboratory                                                                        | Pathogen Discovery, Respiratory Viruses Branch, Division of Viral Diseases, Centers for Disease Control and Prevention            | Anna Uehara; Clinton R. Paden; Haibin Wang; Jing Zhang; Krista Queen; Peter Cook; Suxiang Tong; Yan Li; Ying Tao                                                                                                                                                                                                                                                                                                                                                              |                                                                                                                                                                                                                                                                                                                                                                                                                                                                                                                                                                                                                                                                       |
| EPI_ISL_909957                                                                                                                                                                                 | Apollo Hospitals                                                                                    | CSIR-Centre for Cellular and Molecular Biology                                                                                    | Divya Tej Sowpati; Irawathy Goud; Karthik Bharadwaj Tallapaka; Lamuk Zaveri; Onkar Kulkarni; Payel Mukherjee; Sofia Banu; Suneetha Narreddy                                                                                                                                                                                                                                                                                                                                   |                                                                                                                                                                                                                                                                                                                                                                                                                                                                                                                                                                                                                                                                       |
| EPI_ISL_770030                                                                                                                                                                                 | Area De Salud Buenos Aires                                                                          | Incienza, Instituto Costarricense de Investigación y Enseñanza en Nutrición y Salud                                               | Adriana Godínez; Claudio Soto-Garita; Estela Cordero; Francisco Duarte; Hebleen Porras; Melany Calderón & Mariel López                                                                                                                                                                                                                                                                                                                                                        |                                                                                                                                                                                                                                                                                                                                                                                                                                                                                                                                                                                                                                                                       |
| EPI_ISL_769986, EPI_ISL_769994                                                                                                                                                                 | Area De Salud Catedral Noreste                                                                      | Incienza, Instituto Costarricense de Investigación y Enseñanza en Nutrición y Salud                                               | Adriana Godínez; Claudio Soto-Garita; Estela Cordero; Francisco Duarte; Hebleen Porras; Melany Calderón & Mariel López                                                                                                                                                                                                                                                                                                                                                        |                                                                                                                                                                                                                                                                                                                                                                                                                                                                                                                                                                                                                                                                       |
| EPI_ISL_770008, EPI_ISL_770029                                                                                                                                                                 | Area De Salud Corredores                                                                            | Incienza, Instituto Costarricense de Investigación y Enseñanza en Nutrición y Salud                                               | Adriana Godínez; Claudio Soto-Garita; Estela Cordero; Francisco Duarte; Hebleen Porras; Melany Calderón & Mariel López                                                                                                                                                                                                                                                                                                                                                        |                                                                                                                                                                                                                                                                                                                                                                                                                                                                                                                                                                                                                                                                       |
| EPI_ISL_770020                                                                                                                                                                                 | Area De Salud Goicoechea 2 - Clinica Dr. Jimenez Nuñez                                              | Incienza, Instituto Costarricense de Investigación y Enseñanza en Nutrición y Salud                                               | Adriana Godínez; Claudio Soto-Garita; Estela Cordero; Francisco Duarte; Hebleen Porras; Melany Calderón & Mariel López                                                                                                                                                                                                                                                                                                                                                        |                                                                                                                                                                                                                                                                                                                                                                                                                                                                                                                                                                                                                                                                       |
| EPI_ISL_527747, EPI_ISL_770003                                                                                                                                                                 | Area De Salud La Cruz                                                                               | Incienza, Instituto Costarricense de Investigación y Enseñanza en Nutrición y Salud                                               | Adriana Godínez & Melany Calderon; Adriana Godínez; Claudio Soto-Garita; Estela Cordero; Francisco Duarte; Hebleen Porras; Melany Calderón & Mariel López                                                                                                                                                                                                                                                                                                                     |                                                                                                                                                                                                                                                                                                                                                                                                                                                                                                                                                                                                                                                                       |
| EPI_ISL_491444                                                                                                                                                                                 | Area de Salud Escazu (Coopesana)                                                                    | Incienza, Instituto Costarricense de Investigación y Enseñanza en Nutrición y Salud                                               | Adriana Godínez & Melany Calderon; Claudio Soto-Garita; Estela Cordero; Francisco Duarte; Hebleen Brenes                                                                                                                                                                                                                                                                                                                                                                      |                                                                                                                                                                                                                                                                                                                                                                                                                                                                                                                                                                                                                                                                       |
| EPI_ISL_500631, EPI_ISL_500653, EPI_ISL_500703, EPI_ISL_509505, EPI_ISL_530340, EPI_ISL_537287, EPI_ISL_569858, EPI_ISL_710513, EPI_ISL_745030, EPI_ISL_794671                                 | see above                                                                                           | Area of Virology, Serology and Virology Division (SAVID), New South Wales Health Pathology Randwick                               | Bull, R.; Deveson, I.; Rawlinson, W.; Van Haal, S.; Van Hal, S.                                                                                                                                                                                                                                                                                                                                                                                                               |                                                                                                                                                                                                                                                                                                                                                                                                                                                                                                                                                                                                                                                                       |
| EPI_ISL_1010705                                                                                                                                                                                | Area of Virology, Serology and Virology Division (SAVID), New South Wales Health Pathology Randwick | Microbiology RPAH                                                                                                                 | Au, J.; Bull, R.; Deveson, I.; Foster, C.; Rawlinson, W.; Ruiz Silva, M.; Van Hal, S.                                                                                                                                                                                                                                                                                                                                                                                         |                                                                                                                                                                                                                                                                                                                                                                                                                                                                                                                                                                                                                                                                       |
| EPI_ISL_678377, EPI_ISL_717706, EPI_ISL_812347, EPI_ISL_1098798, EPI_ISL_1121974                                                                                                               | Area of Virology, Serology and Virology Division (SAVID), New South Wales Health Pathology Randwick | Virology Research Laboratory; Area of Virology, Serology and Virology Division (SAVID), New South Wales Health Pathology Randwick | Au, J.; Bull, R.; Deveson, I.; Foster, C.; Rawlinson, W.; Ruiz Silva, M.; Van Hal, S.                                                                                                                                                                                                                                                                                                                                                                                         |                                                                                                                                                                                                                                                                                                                                                                                                                                                                                                                                                                                                                                                                       |
| EPI_ISL_824931, EPI_ISL_968205, EPI_ISL_978375, EPI_ISL_1133220, EPI_ISL_1135090                                                                                                               | Arizona State Public Health Laboratory                                                              | Arizona State Public Health Laboratory                                                                                            | Jessica Escobar; Katherine Fullerton; Linda Getsinger; Nobuko Fukushima; Stacy White; Trung Huynh; Victor Waddell                                                                                                                                                                                                                                                                                                                                                             |                                                                                                                                                                                                                                                                                                                                                                                                                                                                                                                                                                                                                                                                       |
| EPI_ISL_583634, EPI_ISL_854198, EPI_ISL_854250, EPI_ISL_854301, EPI_ISL_1008143, EPI_ISL_1008144, EPI_ISL_1117865, EPI_ISL_1118039, EPI_ISL_1118049                                            | see above                                                                                           | Austrian Agency for Health and Food Safety (AGES)                                                                                 | Berghaler laboratory, CeMM Research Center for Molecular Medicine of the Austrian Academy of Sciences                                                                                                                                                                                                                                                                                                                                                                         | Adi Steinrigl; Alexander Lercher; Alexandra Popa; Andreas Berghaler; Anna Schedl; Bekir Erguner; Benedikt Agerer; Christian Paar; Christoph Bock; Christoph Bock; Daniela Schmid; Dorothee von Laer; Elisabeth Puchhammer-Stoekl; Franz Allerberger; Gernot Walder; Gregor Hörmann; Guenter Weiss; Gunther Vogl; Henrique Colaco; Jakob-Wendelin Genger; Jan Laine; Judith Aberle; Kinga Rigler-Hohenwarter; Lukas Endler; Maelle Le Moing; Manfred Nairz; Mark Smyth; Martin Senekowitsch; Martin Senekowitsch; Michael Schuster; Michael Schuster; Peter Hofnagel; Peter Obrist; Rainer Gattringer; Sabine Sussitz-Rack; Stephan Aberle; Thomas Penz; Wegene Borena |
| EPI_ISL_882637, EPI_ISL_882638, EPI_ISL_882639                                                                                                                                                 | Azerbaijan National Hematology Center Division of Medical Genetics                                  | Azerbaijan National Hematology Center Division of Medical Genetics                                                                | Aghayev Agha Rza; Bayramli Ramin                                                                                                                                                                                                                                                                                                                                                                                                                                              |                                                                                                                                                                                                                                                                                                                                                                                                                                                                                                                                                                                                                                                                       |
| EPI_ISL_458101                                                                                                                                                                                 | B.J. Medical College and Civil hospital                                                             | Gujarat Biotechnology Research Centre                                                                                             | A M Kadri; Amit Kanani; Ankit Hinsu; Apurvasinh Puvar; Bhavesh Modi; Chaitanya Joshi; Dhaval Vaghela; Dinesh Kumar; Fenil Patel; Gaurishankar Shirmali; Janvi Raval; Kamlesh J Upadhyay; Komal Patel; Labdhi Pandya; Madhvi Joshi; Maharshi Pandya; Monika Gandhi; Nidhi Patel; Nitin Savaliya; Pinal Trivedi; Pranay Shah; Pritesh Sabara; R D Dixit; Raghavendra Kumar; Ramesh Pandit; Ramesh Patel; Snehal Bagatharia; Tejas Shah; Umang Mishra; Zarna Patel; Zuber Saiyed |                                                                                                                                                                                                                                                                                                                                                                                                                                                                                                                                                                                                                                                                       |
| EPI_ISL_825035                                                                                                                                                                                 | B.J. Medical College and Civil hospital, Ahmedabad                                                  | Gujarat Biotechnology Research Centre                                                                                             | Atfal Ansari; Apurvasinh Puvar; Chaitanya Joshi; Dinesh Kumar; Dipa Kinariwala; Janvi Raval; Kamlesh J Upadhyay; Labdhi Pandya; Madhvi Joshi; Nikha Trivedi; Nilima Shah; Nitin Savaliya; Pranay Shah; Ramesh Pandit; Sanjay Kapadia; Zarna Patel; Zuber Saiyed                                                                                                                                                                                                               |                                                                                                                                                                                                                                                                                                                                                                                                                                                                                                                                                                                                                                                                       |
| EPI_ISL_995709                                                                                                                                                                                 | BANGALORE MEDICAL COLLEGE AND RESEARCH INSTITUTE                                                    | Department of Neurovirology, National Institute of Mental Health and Neurosciences (NIMHANS)                                      | Anita S Desai; Anson Kunjumon George; Chitra Pattabiraman; Darshan Sreenivas; Nakka Vijay Kiran Reddy; Pramada Prasad; Risha Rasheed; V Ravi                                                                                                                                                                                                                                                                                                                                  |                                                                                                                                                                                                                                                                                                                                                                                                                                                                                                                                                                                                                                                                       |
| EPI_ISL_845874, EPI_ISL_845878                                                                                                                                                                 | BBMP Urban PHC                                                                                      | Department of Neurovirology, National Institute of Mental Health and Neurosciences (NIMHANS)                                      | Anita S Desai; Chitra Pattabiraman; Darshan Sreenivas; Nakka Vijay Kiran Reddy; Pramada Prasad; Risha Rasheed; V Ravi                                                                                                                                                                                                                                                                                                                                                         |                                                                                                                                                                                                                                                                                                                                                                                                                                                                                                                                                                                                                                                                       |
| EPI_ISL_415580, EPI_ISL_974674, EPI_ISL_974760, EPI_ISL_974772, EPI_ISL_974780, EPI_ISL_974798, EPI_ISL_975486, EPI_ISL_976111, EPI_ISL_976667, EPI_ISL_976696, EPI_ISL_976796, EPI_ISL_976887 | see above                                                                                           | BCCDC Public Health Laboratory                                                                                                    | Ana Pacagnella; Choi; Corrinne Ng; Dan Fornika; Gilmour; Harrigan; Hoang; John Tyson; Kamelian; Kim Macdonald; Kimia Kamelian; Krajden; Lapointe;                                                                                                                                                                                                                                                                                                                             |                                                                                                                                                                                                                                                                                                                                                                                                                                                                                                                                                                                                                                                                       |



|                                                                                                                                                                                                                                                                                                                                                                                                                                                                                                                                                                                                                                                                                   |                |                                                                                                            |                                                                                                                                                                                                                                                                                                                                                                                                                                                                                                                                                                                                                                                                                                              |
|-----------------------------------------------------------------------------------------------------------------------------------------------------------------------------------------------------------------------------------------------------------------------------------------------------------------------------------------------------------------------------------------------------------------------------------------------------------------------------------------------------------------------------------------------------------------------------------------------------------------------------------------------------------------------------------|----------------|------------------------------------------------------------------------------------------------------------|--------------------------------------------------------------------------------------------------------------------------------------------------------------------------------------------------------------------------------------------------------------------------------------------------------------------------------------------------------------------------------------------------------------------------------------------------------------------------------------------------------------------------------------------------------------------------------------------------------------------------------------------------------------------------------------------------------------|
|                                                                                                                                                                                                                                                                                                                                                                                                                                                                                                                                                                                                                                                                                   |                |                                                                                                            | Health Agency of Canada CanCOGeN team; Rhiannon Huzarewich; Russell Mandes; Shari Tyson; Timothy Booth; Yan Li                                                                                                                                                                                                                                                                                                                                                                                                                                                                                                                                                                                               |
| EPI_ISL_935895, EPI_ISL_935963, EPI_ISL_979275, EPI_ISL_979301, EPI_ISL_979305, EPI_ISL_979309, EPI_ISL_979311                                                                                                                                                                                                                                                                                                                                                                                                                                                                                                                                                                    | see above      | Cadham Provincial laboratory                                                                               | National Microbiology Laboratory (NML)                                                                                                                                                                                                                                                                                                                                                                                                                                                                                                                                                                                                                                                                       |
|                                                                                                                                                                                                                                                                                                                                                                                                                                                                                                                                                                                                                                                                                   | EPI_ISL_408008 | California Department of Health                                                                            | Pathogen Discovery, Respiratory Viruses Branch, Division of Viral Diseases, Centers for Disease Control and Prevention                                                                                                                                                                                                                                                                                                                                                                                                                                                                                                                                                                                       |
| EPI_ISL_413557, EPI_ISL_413926, EPI_ISL_413931                                                                                                                                                                                                                                                                                                                                                                                                                                                                                                                                                                                                                                    |                | California Department of Public Health                                                                     | Chiu Laboratory, University of California, San Francisco                                                                                                                                                                                                                                                                                                                                                                                                                                                                                                                                                                                                                                                     |
| EPI_ISL_406034, EPI_ISL_410044                                                                                                                                                                                                                                                                                                                                                                                                                                                                                                                                                                                                                                                    |                | California Department of Public Health                                                                     | Pathogen Discovery, Respiratory Viruses Branch, Division of Viral Diseases, Centers for Diseases Control and Prevention                                                                                                                                                                                                                                                                                                                                                                                                                                                                                                                                                                                      |
| EPI_ISL_1096139, EPI_ISL_1096140, EPI_ISL_1096347, EPI_ISL_1096348, EPI_ISL_1098602, EPI_ISL_1098604, EPI_ISL_1098605                                                                                                                                                                                                                                                                                                                                                                                                                                                                                                                                                             | see above      | Cambodian National Public Health Laboratory, National Institute of Public Health                           | Virology Unit, Institut Pasteur du Cambodge                                                                                                                                                                                                                                                                                                                                                                                                                                                                                                                                                                                                                                                                  |
|                                                                                                                                                                                                                                                                                                                                                                                                                                                                                                                                                                                                                                                                                   |                |                                                                                                            | Chau Darapeak; Chin Savuth; Erik A Karlsson; Kraing Sidonn; Ly Sovann; Sokhoun Yann; Veasna Duong; Yi Sengdoeurn                                                                                                                                                                                                                                                                                                                                                                                                                                                                                                                                                                                             |
| EPI_ISL_857321, EPI_ISL_857329, EPI_ISL_857333, EPI_ISL_857338, EPI_ISL_857340, EPI_ISL_857345, EPI_ISL_862785, EPI_ISL_862792, EPI_ISL_862794, EPI_ISL_862799, EPI_ISL_862805, EPI_ISL_890228, EPI_ISL_907086, EPI_ISL_907087, EPI_ISL_907092, EPI_ISL_907102, EPI_ISL_907108                                                                                                                                                                                                                                                                                                                                                                                                    | see above      | Cancer Biology Department, National Cancer Institute                                                       | Cancer Biology Department, National Cancer Institute                                                                                                                                                                                                                                                                                                                                                                                                                                                                                                                                                                                                                                                         |
|                                                                                                                                                                                                                                                                                                                                                                                                                                                                                                                                                                                                                                                                                   |                |                                                                                                            | A.A.; A.E.; A.N.; Abouelhoda, M.; Ahmed; Bahnassy; Elhosieny; F.W.; Gad; H.K.; Hafez; Hamdy; M.G.; M.M.; M.S.; O.S.; Sedawy; Soliman; Soliman, L.; Zekri                                                                                                                                                                                                                                                                                                                                                                                                                                                                                                                                                     |
| EPI_ISL_456352, EPI_ISL_456358, EPI_ISL_548138, EPI_ISL_579066, EPI_ISL_579068, EPI_ISL_579072, EPI_ISL_579090, EPI_ISL_579426, EPI_ISL_579430, EPI_ISL_579496, EPI_ISL_622780, EPI_ISL_622786, EPI_ISL_622795, EPI_ISL_622799, EPI_ISL_622824, EPI_ISL_622828, EPI_ISL_622829, EPI_ISL_661260, EPI_ISL_682283, EPI_ISL_682284, EPI_ISL_682285, EPI_ISL_682286, EPI_ISL_682295, EPI_ISL_682296, EPI_ISL_732963, EPI_ISL_755620, EPI_ISL_755621, EPI_ISL_755622, EPI_ISL_755623, EPI_ISL_755638, EPI_ISL_794627, EPI_ISL_843195, EPI_ISL_843197, EPI_ISL_843198, EPI_ISL_843199, EPI_ISL_843200, EPI_ISL_877219, EPI_ISL_877220, EPI_ISL_1016881, EPI_ISL_1016882, EPI_ISL_1082255 | see above      | Canterbury Health Laboratories                                                                             | Institute of Environmental Science and Research (ESR)                                                                                                                                                                                                                                                                                                                                                                                                                                                                                                                                                                                                                                                        |
|                                                                                                                                                                                                                                                                                                                                                                                                                                                                                                                                                                                                                                                                                   |                |                                                                                                            | Anja Werno; Antje van der Linden; Arlo Upton; Chris Mansell; David Hammer; Dragana Drinkovic; Erasmus Smit; Gary McAuliffe; Hana Sofia Andersson; Hermes Perez; James Ussher; Jill Sherwood; Jing Wang; Joep de Lig; Josh Freeman; Julia Howard; Juliet Elvy; Lauren Jelly; Mary DeAlmeida; Matt Blakiston; Matt Storey; Matthew Rogers; Max Bloomfield; Michael Addidle; Michelle Balm; Muhammad Faisal; Nikki Freed; Olin Silander; Paula scholes; Sally Roberts; Sarah Jefferies; Sharmini Mutaiyah; Susan Lin; Susan Morpeth; Susan Taylor; Timothy Blackmore; Vani Sathyendran; Veronica Playle; Virginia Hope; Xiaoyun Ren                                                                             |
| EPI_ISL_977655, EPI_ISL_977656, EPI_ISL_977658, EPI_ISL_977659                                                                                                                                                                                                                                                                                                                                                                                                                                                                                                                                                                                                                    |                | Caribbean Public Health Agency                                                                             | Carrington Lab, Department of PreClinical Sciences, Building 36, First Floor Biochemistry Unit, Faculty of Medical Sciences, The University of the West Indies                                                                                                                                                                                                                                                                                                                                                                                                                                                                                                                                               |
| EPI_ISL_872196                                                                                                                                                                                                                                                                                                                                                                                                                                                                                                                                                                                                                                                                    |                | Caribbean Public Health Agency                                                                             | Carrington Lab, Department of PreClinical Sciences, Faculty of Medical Sciences, The University of the West Indies                                                                                                                                                                                                                                                                                                                                                                                                                                                                                                                                                                                           |
| EPI_ISL_794663                                                                                                                                                                                                                                                                                                                                                                                                                                                                                                                                                                                                                                                                    |                | Carvajal Laboratorios                                                                                      | Instituto Nacional de Salud - Dirección de Investigación en Salud Pública                                                                                                                                                                                                                                                                                                                                                                                                                                                                                                                                                                                                                                    |
|                                                                                                                                                                                                                                                                                                                                                                                                                                                                                                                                                                                                                                                                                   |                |                                                                                                            | Carlos Franco-Muñoz; Diego A. Álvarez-Díaz; Diego Andrés Prada; Gerardo Santamaría; Jonathan Reales; Julian Kasper; Katherine Laiton-Donato; Magdalena Wiesner; Marcela Mercado-Reyes; María T. Herrera; Martha Lucia Ospina Martínez; Mauricio Pacheco-Montealegre; Paola Muñoz-Laiton; Sheryl Corchuelo                                                                                                                                                                                                                                                                                                                                                                                                    |
| EPI_ISL_1122435, EPI_ISL_1122443, EPI_ISL_1122447, EPI_ISL_1122450                                                                                                                                                                                                                                                                                                                                                                                                                                                                                                                                                                                                                |                | Cebu TB Reference Laboratory                                                                               | Philippine Genome Center                                                                                                                                                                                                                                                                                                                                                                                                                                                                                                                                                                                                                                                                                     |
|                                                                                                                                                                                                                                                                                                                                                                                                                                                                                                                                                                                                                                                                                   |                |                                                                                                            | Alethea R. de Guzman; Anna Ong-Lim; Arianne A. Zamora; Asia Louisa U. Chong; Benedict A. Maralit; Candice Francheska B. Tambaoan; Carlo M. Lapid; Celia Carlos; Devon Ray Pacial; Edsel Maurice Salvaña; El King D. Morado; Eva Maria Cutiongco-de la Paz; Francis A. Tablizo; Irish Coleen A. Asin; Jaime C. Montoya; Jan Michael C. Yap; Jo-Hannah S. Llamas; John Q. Wong; Joshua Gregor A. Dizon; Juan Antonio R. Magalang; Karol Sophia Agape R. Padilla; Kenneth M. Kim; Kris P. Punayan; Marc Edsel C. Ayes; Marc Jerrone R. Castro; Maria Rosario Singh-Vergiere and Cynthia P. Saloma; Maria Sofia L. Yangzon; Marissa Alejandria; Razel Nikka M. Hao; Rianna Patricia S. Cruz; Sheila Mae M. Araza |
| EPI_ISL_824584                                                                                                                                                                                                                                                                                                                                                                                                                                                                                                                                                                                                                                                                    |                | Cedars-Sinai Medical Center, Department of Pathology & Laboratory Medicine, Molecular Pathology Laboratory | Cedars-Sinai Medical Center, Molecular Pathology Laboratory of Department of Pathology & Laboratory Medicine and Genomic Core                                                                                                                                                                                                                                                                                                                                                                                                                                                                                                                                                                                |
|                                                                                                                                                                                                                                                                                                                                                                                                                                                                                                                                                                                                                                                                                   |                |                                                                                                            | Brian Davis; Eric Vail; Jasmine T Plummer; Jorge Mario Sincuir Martinez; Stephanie Chen; Wenjuan Zhang                                                                                                                                                                                                                                                                                                                                                                                                                                                                                                                                                                                                       |
| EPI_ISL_971451                                                                                                                                                                                                                                                                                                                                                                                                                                                                                                                                                                                                                                                                    |                | Cell culture Unit at CV-MIT belonging to HIMMV                                                             | Functional Genomic Platform UATRS-biology, CNRST                                                                                                                                                                                                                                                                                                                                                                                                                                                                                                                                                                                                                                                             |
|                                                                                                                                                                                                                                                                                                                                                                                                                                                                                                                                                                                                                                                                                   |                |                                                                                                            | Abderrazzak Rfak; Amine Idriss Lahlou; Elmostafa EL FAHIME; Hicham Elannaz; Khalid ENNIBI; Marouane MELLOUL; Mly Abdelaziz ELALAOUI; Mostafa ELLOUENASS; Mouhssine Hemtali; Nadia Touil; Sanaa ALAOUI-Amine                                                                                                                                                                                                                                                                                                                                                                                                                                                                                                  |
| EPI_ISL_1067728                                                                                                                                                                                                                                                                                                                                                                                                                                                                                                                                                                                                                                                                   |                | Center for Biotechnology and Cell Therapy, São Rafael Hospital, Salvador, Brazil                           | Central Public Health Laboratory - LACEN -Bahia, Salvador, Brazil                                                                                                                                                                                                                                                                                                                                                                                                                                                                                                                                                                                                                                            |
|                                                                                                                                                                                                                                                                                                                                                                                                                                                                                                                                                                                                                                                                                   |                |                                                                                                            | Arabela Leal; Breno Dominguez; Felicidade Pereira; Jaqueline Gomes; Luciana Oliveira; Luiz Alcantara; Marcela Gómez; Marta Giovanetti; Patricia Cajado; Stephane Tosta; Vagner Fonseca; Vanessa Nardy                                                                                                                                                                                                                                                                                                                                                                                                                                                                                                        |
| EPI_ISL_419661, EPI_ISL_853842, EPI_ISL_853908, EPI_ISL_854299                                                                                                                                                                                                                                                                                                                                                                                                                                                                                                                                                                                                                    |                | Center for Virology, Medical University of Vienna                                                          | Bergthaler laboratory, CeMM Research Center for Molecular Medicine of the Austrian Academy of Sciences                                                                                                                                                                                                                                                                                                                                                                                                                                                                                                                                                                                                       |
|                                                                                                                                                                                                                                                                                                                                                                                                                                                                                                                                                                                                                                                                                   |                |                                                                                                            | Alexander Lercher; Alexandra Popa; Andreas Bergthaler; Anna Schedl; Benedikt Agerer; Christoph Bock; Christoph Bock; Elisabeth Puchhammer-Stöckl; Henrique Colaco; Jakob-Wendelin Genger; Jan Laine; Judith Aberle; Lukas Endler; Mark Smyth; Martin Senekowitsch; Michael Schuster; Michael Schuster; Stephan Aberle; Thomas Penz                                                                                                                                                                                                                                                                                                                                                                           |
| EPI_ISL_1039058, EPI_ISL_1039061, EPI_ISL_1039073                                                                                                                                                                                                                                                                                                                                                                                                                                                                                                                                                                                                                                 |                | Center of Hygiene and Epidemiology in Belgorod Region                                                      | WHO National Influenza Centre Russian Federation                                                                                                                                                                                                                                                                                                                                                                                                                                                                                                                                                                                                                                                             |
|                                                                                                                                                                                                                                                                                                                                                                                                                                                                                                                                                                                                                                                                                   |                |                                                                                                            | Andrey Komissarov; Anna Ivanova; Artem Fadeev; Daria Danilenko; Dmitry Bazhenov; Dmitry Liznov; Elena Nabieva; Georgii Bazykin; Ksenia Safina; Kseniya Komissarova; Lyudmila Berdinskikh; Maria Pisareva; Maria Timofeeva; Tamila Musaveva; Veronika Eder                                                                                                                                                                                                                                                                                                                                                                                                                                                    |
| EPI_ISL_940904                                                                                                                                                                                                                                                                                                                                                                                                                                                                                                                                                                                                                                                                    |                | Centers for Disease Control and Prevention, Dengue Branch                                                  | Centers for Disease Control and Prevention, Dengue Branch                                                                                                                                                                                                                                                                                                                                                                                                                                                                                                                                                                                                                                                    |
|                                                                                                                                                                                                                                                                                                                                                                                                                                                                                                                                                                                                                                                                                   |                |                                                                                                            | Betzabel Flores; Gabriela Paz-Bailey; Gilberto A. Santiago; Glenda Gonzalez; Jorge L. Munoz-Jordan; Keyla Charriez                                                                                                                                                                                                                                                                                                                                                                                                                                                                                                                                                                                           |
| EPI_ISL_428489, EPI_ISL_857314                                                                                                                                                                                                                                                                                                                                                                                                                                                                                                                                                                                                                                                    |                | Centers for Disease Control, R.O.C. (Taiwan)                                                               | Centers for Disease Control, R.O.C. (Taiwan)                                                                                                                                                                                                                                                                                                                                                                                                                                                                                                                                                                                                                                                                 |
|                                                                                                                                                                                                                                                                                                                                                                                                                                                                                                                                                                                                                                                                                   |                |                                                                                                            | Ji-Rong Yang; Jung-Jung Mu; Jung-Jung-Mu; Ming-Tsan Liu; Yu-Chi Lin                                                                                                                                                                                                                                                                                                                                                                                                                                                                                                                                                                                                                                          |
| EPI_ISL_815257                                                                                                                                                                                                                                                                                                                                                                                                                                                                                                                                                                                                                                                                    |                | Centogene                                                                                                  | Centogene                                                                                                                                                                                                                                                                                                                                                                                                                                                                                                                                                                                                                                                                                                    |
|                                                                                                                                                                                                                                                                                                                                                                                                                                                                                                                                                                                                                                                                                   |                |                                                                                                            | Krishna Kumar Kandaswamy; Peter Bauer; Vivi Hue-Trang Lieu                                                                                                                                                                                                                                                                                                                                                                                                                                                                                                                                                                                                                                                   |
| EPI_ISL_943609, EPI_ISL_943613, EPI_ISL_983868                                                                                                                                                                                                                                                                                                                                                                                                                                                                                                                                                                                                                                    |                | Central Laboratory of Public Health of Rio Grande do Sul (Lacen-RS)                                        | State Center for Health Surveillance of the Health Department of the State of Rio Grande do Sul (CEVS/SES-RS)                                                                                                                                                                                                                                                                                                                                                                                                                                                                                                                                                                                                |
|                                                                                                                                                                                                                                                                                                                                                                                                                                                                                                                                                                                                                                                                                   |                |                                                                                                            | Aline Campos; Amanda da Silva; Anelise Schaurich; Claudia Dornelles; Cynthia Molina; Fernanda Godinho; Lara Crescente; Leticia Garay; Ludmila Fiorenzano Baetngen; Regina Barcellos; Richard Salvato; Tatiana Gregianini; Vagner Fonseca                                                                                                                                                                                                                                                                                                                                                                                                                                                                     |
| EPI_ISL_693471, EPI_ISL_693474, EPI_ISL_693477, EPI_ISL_693480, EPI_ISL_693481, EPI_ISL_693482                                                                                                                                                                                                                                                                                                                                                                                                                                                                                                                                                                                    |                | Central Public Health Laboratory                                                                           | National Public Health Laboratory, National Centre for Infectious Diseases                                                                                                                                                                                                                                                                                                                                                                                                                                                                                                                                                                                                                                   |
|                                                                                                                                                                                                                                                                                                                                                                                                                                                                                                                                                                                                                                                                                   |                |                                                                                                            | Esorom Daoni; Lin Cui; Raymond Tzer Pin Lin; Sophie Octavia; Theresa Palou; Tze Minn Mak; Zhienyang Zhou                                                                                                                                                                                                                                                                                                                                                                                                                                                                                                                                                                                                     |
| EPI_ISL_978499, EPI_ISL_978522, EPI_ISL_978527, EPI_ISL_1067733, EPI_ISL_1067734                                                                                                                                                                                                                                                                                                                                                                                                                                                                                                                                                                                                  |                | Central Public Health Laboratory - LACEN -Bahia, Salvador, Brazil                                          | Central Public Health Laboratory - LACEN -Bahia, Salvador, Brazil                                                                                                                                                                                                                                                                                                                                                                                                                                                                                                                                                                                                                                            |
|                                                                                                                                                                                                                                                                                                                                                                                                                                                                                                                                                                                                                                                                                   |                |                                                                                                            | Arabela Leal; Breno Dominguez; Felicidade Pereira; Jaqueline Gomes; Luciana Oliveira; Luiz Alcantara; Marcela Gómez; Marta Giovanetti; Patricia Cajado; Stephane Tosta; Vagner Fonseca; Vanessa Nardy                                                                                                                                                                                                                                                                                                                                                                                                                                                                                                        |
| EPI_ISL_419211                                                                                                                                                                                                                                                                                                                                                                                                                                                                                                                                                                                                                                                                    |                | Central Virology Laboratory                                                                                | Israel Institute for Biological Research                                                                                                                                                                                                                                                                                                                                                                                                                                                                                                                                                                                                                                                                     |
|                                                                                                                                                                                                                                                                                                                                                                                                                                                                                                                                                                                                                                                                                   |                |                                                                                                            | Adi Beth-Din; Anat Zvi; Boaz Politi; Dana Stein; Einat Vitner; Gadi Segal; Gili Regev-Yochay; Hadas Tamir; Hagit Achdout; Inbar Cohen-Gihon; Lilach Cherry; Michal Mandelboim; Nir Paran; Ofir Israeli; Ohad Shifman; Oran Erster; Orly Laskar; Sharon Melamed; Shay Weiss; Shmuel C. Shapira; Shmuel Yitzhaki; Tomer Israely; Yfat Yahalom Ronen                                                                                                                                                                                                                                                                                                                                                            |
| EPI_ISL_885143                                                                                                                                                                                                                                                                                                                                                                                                                                                                                                                                                                                                                                                                    |                | Central public health laboratory                                                                           | Molecular Diagnostics Department, Central public health laboratory                                                                                                                                                                                                                                                                                                                                                                                                                                                                                                                                                                                                                                           |
|                                                                                                                                                                                                                                                                                                                                                                                                                                                                                                                                                                                                                                                                                   |                |                                                                                                            | Dalia, F.; Dier, H.; Dlishad, H.; F.-A.; Fahmi, A.; Furat, S.; Hemdad, A.; Hemn, M. and Idrees, H.; Mohsen, A.; Sharmeen                                                                                                                                                                                                                                                                                                                                                                                                                                                                                                                                                                                     |
| EPI_ISL_961811, EPI_ISL_961826                                                                                                                                                                                                                                                                                                                                                                                                                                                                                                                                                                                                                                                    |                | Centrāla laboratorija                                                                                      | Latvian Biomedical Research and Study Centre                                                                                                                                                                                                                                                                                                                                                                                                                                                                                                                                                                                                                                                                 |
|                                                                                                                                                                                                                                                                                                                                                                                                                                                                                                                                                                                                                                                                                   |                |                                                                                                            | Davids Fridmanis; Ivars Silamikelis; Jana Osite; Janis Pjalkovskis; Janis Klovinis; Juris Perevoscikovs; Kaspars Megnis; Laila Silamikele; Lauma Freimane; Laura Ansonie; Liga Birzniece; Marta Priedite; Monta Ustinova; Nikita Zrelous; Uga Dumpis; Vita Rovite                                                                                                                                                                                                                                                                                                                                                                                                                                            |
| EPI_ISL_539575                                                                                                                                                                                                                                                                                                                                                                                                                                                                                                                                                                                                                                                                    |                | Centre de Recherches Medicales de Lambarene (CERMEL)                                                       | Department of Emerging Infectious Diseases, Institute of Tropical Medicine, Nagasaki University                                                                                                                                                                                                                                                                                                                                                                                                                                                                                                                                                                                                              |
|                                                                                                                                                                                                                                                                                                                                                                                                                                                                                                                                                                                                                                                                                   |                |                                                                                                            | Akim A. Adegnika; Bertrand Leli; Haruka Abe; Jiro Yasuda; Rodrigue Bikangui; Yuri Ushijima                                                                                                                                                                                                                                                                                                                                                                                                                                                                                                                                                                                                                   |
| EPI_ISL_978535, EPI_ISL_978546                                                                                                                                                                                                                                                                                                                                                                                                                                                                                                                                                                                                                                                    |                | Centre de Virologie des Maladies infectueuses Tropicales                                                   | Functional Genomic Platform UATRS-biology, CNRST                                                                                                                                                                                                                                                                                                                                                                                                                                                                                                                                                                                                                                                             |
|                                                                                                                                                                                                                                                                                                                                                                                                                                                                                                                                                                                                                                                                                   |                |                                                                                                            | ; Abdellilah LARAQUI; Abderrazzak Rfaki; Elmostafa BENAÏSSA; Elmostafa EL FAHIME; Farida HILALI; Hemlali Mouhssine; Khalid ENNIBI; Marouane                                                                                                                                                                                                                                                                                                                                                                                                                                                                                                                                                                  |

|                                                                                                                                                                                                                                                                                                |                                                                                                                                                                                                                     |                                                                                                                                                                                                                                                         |                                                                                                                                                                                                                                                                                                                                                                                                                                                                                  |
|------------------------------------------------------------------------------------------------------------------------------------------------------------------------------------------------------------------------------------------------------------------------------------------------|---------------------------------------------------------------------------------------------------------------------------------------------------------------------------------------------------------------------|---------------------------------------------------------------------------------------------------------------------------------------------------------------------------------------------------------------------------------------------------------|----------------------------------------------------------------------------------------------------------------------------------------------------------------------------------------------------------------------------------------------------------------------------------------------------------------------------------------------------------------------------------------------------------------------------------------------------------------------------------|
|                                                                                                                                                                                                                                                                                                |                                                                                                                                                                                                                     |                                                                                                                                                                                                                                                         | MELLOUL; Mly Abdelaziz ELALAOUI; Mostafa ELOUENASS; Nadia Touil; Sanaa ALAOUI-Amine; Tahar BAJJOU; Yassine SEKHSOKH                                                                                                                                                                                                                                                                                                                                                              |
| EPI_ISL_471460                                                                                                                                                                                                                                                                                 | Centre de Virologie des Maladies Tropicales                                                                                                                                                                         | Functional Genomic Platform/Service Analyses Biologique/UATRS/ Centre National Pour la Recherche Scientifique Et Technique (CNRST)                                                                                                                      | Abdeillah LARAQUI; Abdelkader LAATIRIS; Ahmed REGGAD; Elmoustafa EL FAHIME; Farida HILALI; Hicham EL ANNAZ; Idriss-Amine LAHLLOU; Khalid ENNIBI; Marouane MELLOUL; Mly Abdelaziz ELALAOUI; Mostafa ELOUENASS; Nadia TOUIL; Rachid ABI; Rida TAGAJDID; Safae ELKOCHRI; Sanaa ALAOUI-Amine; Tahar BAJJOU; Yassine SEKHSOKH; Youssef AKHOUD; Zohour KASMY                                                                                                                           |
| EPI_ISL_525476, EPI_ISL_525481, EPI_ISL_525486                                                                                                                                                                                                                                                 | Centre for Dengue Research                                                                                                                                                                                          | Centre for Dengue Research                                                                                                                                                                                                                              | Ananda Wijewickrama; Chandima Jeewandara; Damayanthi Idampitiya; Deshni Jayathilaka; Dinuka Ariyaratne; Dinuka Guruge; Diyanath Ranasinghe; Eranga Narangoda; Gathsaurie Neelika Malavige; Laksiri Gomes; Malika Karunaratne; Ruwan Wijayamuni                                                                                                                                                                                                                                   |
| EPI_ISL_525474                                                                                                                                                                                                                                                                                 | Centre for Dengue Research                                                                                                                                                                                          | Centre for Dengue Research, USJ, SL                                                                                                                                                                                                                     | Chandima Jeewandara; Deshni Jayathilaka; Dinuka Ariyaratne; Dinuka Guruge; Diyanath Ranasinghe; Gathsaurie Neelika Malavige; Laksiri Gomes; Ruwan Wijayamuni                                                                                                                                                                                                                                                                                                                     |
| EPI_ISL_792548, EPI_ISL_792549, EPI_ISL_792550, EPI_ISL_792556, EPI_ISL_978918, EPI_ISL_978920, EPI_ISL_978921, EPI_ISL_978922, EPI_ISL_978923, EPI_ISL_978934, EPI_ISL_978984, EPI_ISL_978985, EPI_ISL_996042                                                                                 |                                                                                                                                                                                                                     |                                                                                                                                                                                                                                                         |                                                                                                                                                                                                                                                                                                                                                                                                                                                                                  |
| see above                                                                                                                                                                                                                                                                                      | Centre for Dengue Research and AICBU, Department of Immunology and Molecular Medicine                                                                                                                               | Centre for Dengue Research and AICBU, Department of Immunology and Molecular Medicine                                                                                                                                                                   | Chandima Jeewandara; Deshni Jayathilaka; Dinuka Ariyaratne; Diyanath Ranasinghe; Gathsaurie Neelika Malavige; Laksiri Gomes; Tibutius Thanesh Pramanayagam                                                                                                                                                                                                                                                                                                                       |
| EPI_ISL_602566, EPI_ISL_668447, EPI_ISL_668448, EPI_ISL_668450, EPI_ISL_668452, EPI_ISL_668453                                                                                                                                                                                                 | Centre for Dengue Research, Department of Immunology and Molecular Medicine                                                                                                                                         | Centre for Dengue Research, Department of Immunology and Molecular Medicine                                                                                                                                                                             | Chandima Jeewandara; Deshni Jayathilaka; Dinuka Ariyaratne; Diyanath Ranasinghe; Gathsaurie Neelika Malavige; Laksiri Gomes                                                                                                                                                                                                                                                                                                                                                      |
| EPI_ISL_413550                                                                                                                                                                                                                                                                                 | Centre for Human and Zoonotic Virology (CHAZVY), College of Medicine University of Lagos/Lagos University Teaching Hospital (LUTH), part of the Laboratory Network of the Nigeria Centre for Disease Control (NCDC) | African Centre of Excellence for Genomics of Infectious Diseases (ACEGID), Redeemer's University, Ede, Osun State, Nigeria                                                                                                                              | Ajogbasile F.V.; Folarin O.A.; Ihekweazu C. Happi C.T.; Kayode A.; Oguzie J.; Olunji P.E.                                                                                                                                                                                                                                                                                                                                                                                        |
| EPI_ISL_413596                                                                                                                                                                                                                                                                                 | Centre for Infectious Diseases and Microbiology - Public Health                                                                                                                                                     | NSW Health Pathology - Institute of Clinical Pathology and Medical Research; Westmead Hospital; University of Sydney                                                                                                                                    | Carter I; Chen SC; Eden J-S; Gall; Gray K; Holmes EC; Kok J and Dwyer DE for the 2019-nCoV Study Group*; Lam C; M; Maddocks S; O'Sullivan MV; Rahman H; Rockett R; Sintchenko V; Timms; V                                                                                                                                                                                                                                                                                        |
| EPI_ISL_413595                                                                                                                                                                                                                                                                                 | Centre for Infectious Diseases and Microbiology Laboratory Services                                                                                                                                                 | NSW Health Pathology - Institute of Clinical Pathology and Medical Research; Westmead Hospital; University of Sydney                                                                                                                                    | Carter I; Chen SC; Eden J-S; Gall; Gray K; Holmes EC; Kok J and Dwyer DE for the 2019-nCoV Study Group*; Lam C; M; Maddocks S; O'Sullivan MV; Rahman H; Rockett R; Sintchenko V; Timms; V                                                                                                                                                                                                                                                                                        |
| EPI_ISL_427792                                                                                                                                                                                                                                                                                 | Centre for Infectious Diseases and Microbiology Public Health                                                                                                                                                       | NSW Health Pathology - Institute of Clinical Pathology and Medical Research; Westmead Hospital; University of Sydney                                                                                                                                    | Arnott A; Bachmann N; Basile K; Byun R; Carter I; Chang S; Chen SC; Draper J; Dwyer DE for the 2019-nCoV Study Group; Eden JS; Gall M; Gray K; Holmes EC; Kok J; Lam C; Maddocks S; O'Sullivan MV; Propenko M; Rockett R; Sadsad R; Sim E; Sintchenko V; Sorrell T; Timms; V                                                                                                                                                                                                     |
| EPI_ISL_837553, EPI_ISL_837554, EPI_ISL_837556, EPI_ISL_837557, EPI_ISL_837558, EPI_ISL_837559, EPI_ISL_837560, EPI_ISL_837561, EPI_ISL_837562, EPI_ISL_837563, EPI_ISL_837564, EPI_ISL_837565, EPI_ISL_837571, EPI_ISL_837572, EPI_ISL_837573, EPI_ISL_837576, EPI_ISL_837577, EPI_ISL_837578 |                                                                                                                                                                                                                     |                                                                                                                                                                                                                                                         |                                                                                                                                                                                                                                                                                                                                                                                                                                                                                  |
| see above                                                                                                                                                                                                                                                                                      | Centro Nacional de Enfermedades Tropicales (CENETROP)                                                                                                                                                               | Laboratory of Respiratory Viruses and Measles, Oswaldo Cruz Institute, FIOCRUZ                                                                                                                                                                          | Ana Carolina Mendonca; Anna Carolina Paixao; Cinthia Avila; Fernando Motta; Luciana Appolinario; Marilda Siqueira on behalf of the Fiocruz COVID-19 Genomic Surveillance Network; Paola Resende; Roxana Loayza                                                                                                                                                                                                                                                                   |
| EPI_ISL_629021                                                                                                                                                                                                                                                                                 | Centro de Biotecnología Vegetal, Universidad Andrés Bello, Center for Genome Regulation                                                                                                                             | Center for Mathematical Modeling and Center for Genome Regulation, Santiago, Chile                                                                                                                                                                      | Allende ML; Ariagada G; Bastias M; Bustos F; Castro E; González M; M; Maass A; Meneses C.; Montecino; Orellana A; Sanhueza D; Travisany D                                                                                                                                                                                                                                                                                                                                        |
| EPI_ISL_941115, EPI_ISL_941117, EPI_ISL_941125, EPI_ISL_941153, EPI_ISL_941161                                                                                                                                                                                                                 | Centro de Investigaciones en Microbiología y Biotecnología-UR (CIMBIUR), Facultad de Ciencias Naturales, Universidad del Rosario, Bogotá, Colombia                                                                  | Centro de Investigaciones en Microbiología y Biotecnología-UR (CIMBIUR), Facultad de Ciencias Naturales, Universidad del Rosario, Bogotá, Colombia Icahn School of Medicine at Mount Sinai, New York, USA                                               | Adriana van de Guchte; Alberto Paniz-Mondolfi; Alejandro Feged-Rivadeneira; Ana S. Gonzalez-Reiche; Andrés Angel; Carolina Flórez; Carolina Hernández; Emilia Mia Sordillo; Felipe González-Casabianca; Hala Alejeil Alshammary; Harm van Bakel; Iván Carroll; Jaime Cascante; Jayeeta Dutta; Juan David Ramírez; Luz Helena Patiño; Marina Muñoz; Matthew M. Hernandez; Mauricio Santos-Vega; Mónica Palma-Cuero; Nathalia Ballesteros; Sergio Gomez; Viviana Simon; Zenab Khan |
| EPI_ISL_941947, EPI_ISL_941979                                                                                                                                                                                                                                                                 | Centro de Investigaciones en Microbiología y Biotecnología-UR (CIMBIUR), Facultad de Ciencias Naturales, Universidad del Rosario, Bogotá, Colombia                                                                  | Centro de Investigaciones en Microbiología y Biotecnología-UR (CIMBIUR), Facultad de Ciencias Naturales, Universidad del Rosario, Bogotá, Colombia Instituto Nacional de Salud, Bogotá, Colombia Icahn School of Medicine at Mount Sinai, New York, USA | Adriana van de Guchte; Alberto Paniz-Mondolfi; Ana S. Gonzalez-Reiche; Carolina Flórez; Carolina Hernández; Emilia Mia Sordillo; Hala Alejeil Alshammary; Harm van Bakel; Jayeeta Dutta; Juan David Ramírez; Luz Helena Patiño; Marina Muñoz; Matthew M. Hernandez; Nathalia Ballesteros; Sergio Gomez; Viviana Simon; Zenab Khan                                                                                                                                                |
| EPI_ISL_491934, EPI_ISL_594118                                                                                                                                                                                                                                                                 | Centro de Investigaciones, Universidad de Especialidades Espíritu Santo                                                                                                                                             | Institute of Microbiology, Universidad San Francisco de Quito                                                                                                                                                                                           | Belén Prado-Vivar; Bernardo Gutiérrez; Derly Andrade; Edith Lopez; Fernando Espinoza; Gabriel Morey; Gabriel Trueba; Jose Pedro Barberan; Juan Carlos Fernandez; Juan José Guadalupe; Michelle Grunauer; Monica Becerra-Wong; Patricio Rojas-Silva; Paul Cárdenas; Ruben Armas; Sully Márquez; Verónica Barragán                                                                                                                                                                 |
| EPI_ISL_693242                                                                                                                                                                                                                                                                                 | Centro de Vigilância a Saude de Diadema                                                                                                                                                                             | Instituto Adolfo Lutz, Interdisciplinary Procedures Center, Strategic Laboratory                                                                                                                                                                        | Claudia Regina Gonçalves; Claudio Tavares Sacchi; Erica Valessa Ramos Gomes; Karoline Rodrigues Campos                                                                                                                                                                                                                                                                                                                                                                           |
| EPI_ISL_450523, EPI_ISL_639677                                                                                                                                                                                                                                                                 | Centrl Laboratorija                                                                                                                                                                                                 | Latvian Biomedical Research and Study Centre                                                                                                                                                                                                            | Ivars Silamielis; Jana Oste; Jnis Kloviš; Kaspars Megnis; Marta Priedte; Monta Ustinova; Stella Lapia; Uga Dumpis; Vita Rovte; ikita Zrelovs                                                                                                                                                                                                                                                                                                                                     |
| EPI_ISL_486390, EPI_ISL_486437, EPI_ISL_501922                                                                                                                                                                                                                                                 | Centrl laboratorija                                                                                                                                                                                                 | Latvian Biomedical Research and Study Centre                                                                                                                                                                                                            | Ivars Silamielis; Jana Oste; Jnis Kloviš; Kaspars Megnis; Marta Priedte; Monta Ustinova; Stella Lapia; Uga Dumpis; Vita Rovte; ikita Zrelovs                                                                                                                                                                                                                                                                                                                                     |
| EPI_ISL_862136, EPI_ISL_862154                                                                                                                                                                                                                                                                 | Charité Universitätsmedizin Berlin, Institut für Virologie/Labor Berlin                                                                                                                                             | Charité Universitätsmedizin Berlin, Institut für Virologie                                                                                                                                                                                              | Barbara Mühlemann; Christian Drosten; Julia Schneider; Julia Tesch; Jörn Beheim-Schwarzbach; Talitha Veith; Terry Jones; Tobias Bleicker; Victor M Corman                                                                                                                                                                                                                                                                                                                        |
| EPI_ISL_729478, EPI_ISL_753903, EPI_ISL_912231, EPI_ISL_912253                                                                                                                                                                                                                                 | Charité Universitätsmedizin Berlin, Institut für Virologie/Labor Berlin                                                                                                                                             | Charité Universitätsmedizin Berlin, Institut für Virologie                                                                                                                                                                                              | Barbara Mühlemann; Christian Drosten; Julia Schneider; Julia Tesch; Jörn Beheim-Schwarzbach; Talitha Veith; Terry Jones; Tobias Bleicker; Victor M Corman                                                                                                                                                                                                                                                                                                                        |
| EPI_ISL_940124                                                                                                                                                                                                                                                                                 | Charlotte Maxeke Johannesburg Academic Hospital, National Health Laboratory Services, Gauteng, South Africa                                                                                                         | National Institute for Communicable Diseases of the National Health Laboratory Service                                                                                                                                                                  | Allam M; Amoako DG; Bhiman JN; Ismail A; Mahlungu B; Mohale T; Ntuli N                                                                                                                                                                                                                                                                                                                                                                                                           |
| EPI_ISL_735497                                                                                                                                                                                                                                                                                 | Chattogram Veterinary and Animal Sciences University                                                                                                                                                                | Central Biological Research Laboratory and Department of Biochemistry and Molecular Biology                                                                                                                                                             | H. M. Abdullah Al Masud; Imam Hossen; Md. Arif Hossain; Md. Imranul Hoq; Md. Khondakar Raziur Rahman; Md. Omer Faruq; Mohammad Omar Faruque; Robiul Hasan Bhuiyan; Sajib Rudra; Shanta Paul                                                                                                                                                                                                                                                                                      |
| EPI_ISL_492028, EPI_ISL_700338, EPI_ISL_700347, EPI_ISL_906096, EPI_ISL_906097, EPI_ISL_906116                                                                                                                                                                                                 | Child Health Research Foundation                                                                                                                                                                                    | Child Health Research Foundation                                                                                                                                                                                                                        | Afroza Akter Tanni; Arif Mohammad Tanmoy; Maksuda Islam; Md Hafizur Rahman; Md Saiful Islam Sajib; Roly Malaker; Samir K Saha; Senjuti Saha; Sharmistha Goswami; Syed Muktedir Al Sium                                                                                                                                                                                                                                                                                           |
| EPI_ISL_455068                                                                                                                                                                                                                                                                                 | Childrens Hospital Westmead                                                                                                                                                                                         | NSW Health Pathology - Institute of Clinical Pathology and Medical Research; Westmead Hospital; University of Sydney                                                                                                                                    | CIDM-PH et al.                                                                                                                                                                                                                                                                                                                                                                                                                                                                   |
| EPI_ISL_462461                                                                                                                                                                                                                                                                                 | Clinical Center, University of Sarajevo                                                                                                                                                                             | Charite Universitatsmedizin Berlin, Institute of Virology                                                                                                                                                                                               | Almedina Hadzhasanovic-Moro; Amela Dedeic-Ljubovic; Barbara Muehlemann; Christian Drosten; Irma Salimovic-Besic; Jörn Beheim-Schwarzbach; Julia Schneider; Selma Mutevelic; Suzana Arapic; Talitha Veith; Terry Jones; Victor M Corman                                                                                                                                                                                                                                           |
| EPI_ISL_902967, EPI_ISL_902980                                                                                                                                                                                                                                                                 | Clinical Diagnostics Laboratory, Diagnostic & Experimental Pathology, Lilly Research Laboratories                                                                                                                   | Clinical Diagnostics Laboratory, Diagnostic & Experimental Pathology, Lilly Research Laboratories                                                                                                                                                       | Andrew Schade; Angie Fulford; Erin Wray; Jeff Fill; Joe Oakley; John Calley; John McElwee; Leslie O'Neill Reising; Mayuri Vaidya; Pat Finnegan; Phil Ebert; Rachael Redmond; Sam McNeely; Tim Holzer                                                                                                                                                                                                                                                                             |
| EPI_ISL_677718                                                                                                                                                                                                                                                                                 | Clinical Hospital - Bitola                                                                                                                                                                                          | Research Center for Genetic Engineering and Biotechnology "Georgi D. Eftremov" , Macedonian Academy of Sciences and Arts                                                                                                                                | RCGEB - MASA                                                                                                                                                                                                                                                                                                                                                                                                                                                                     |
| EPI_ISL_678259                                                                                                                                                                                                                                                                                 | Clinical Hospital - Shtip                                                                                                                                                                                           | Research Center for Genetic Engineering and Biotechnology "Georgi D. Eftremov" , Macedonian Academy of Sciences and Arts                                                                                                                                | RCGEB - MASA                                                                                                                                                                                                                                                                                                                                                                                                                                                                     |
| EPI_ISL_1122423                                                                                                                                                                                                                                                                                | Clinical Microbiology Laboratory, Faculty of Medicine, Universitas Indonesia                                                                                                                                        | Clinical Microbiology Laboratory, Faculty of Medicine, Universitas Indonesia                                                                                                                                                                            | Andi Yasmon; Anis Karuniawati; Augustine Natasha; Erni J. Nelwan; Fera Ibrahim; Fithriyah; Pratiwi Sudarmono; Yulia Rosa Saharman                                                                                                                                                                                                                                                                                                                                                |
| EPI_ISL_877594, EPI_ISL_877637,                                                                                                                                                                                                                                                                | Clinical Molecular Microbiology Laboratory, UNC Hospital                                                                                                                                                            | Dirk Dittmer                                                                                                                                                                                                                                            | Angelica Juarez; Blossom Damania.; Brent A. Eason; Cameroon Grant; Carolina Caro-Vegas; Cecilia Thompson; Dirk Dittmer; Evelyn Hoffman; Jason                                                                                                                                                                                                                                                                                                                                    |

|                                                                                                                                                                                                |                                                                                                                                                                                         |                                                                                                                                                                                                 |                                                                                                                                                                                                                                                                                                                                                                                                                                                                                                                                                                                                   |
|------------------------------------------------------------------------------------------------------------------------------------------------------------------------------------------------|-----------------------------------------------------------------------------------------------------------------------------------------------------------------------------------------|-------------------------------------------------------------------------------------------------------------------------------------------------------------------------------------------------|---------------------------------------------------------------------------------------------------------------------------------------------------------------------------------------------------------------------------------------------------------------------------------------------------------------------------------------------------------------------------------------------------------------------------------------------------------------------------------------------------------------------------------------------------------------------------------------------------|
| EPI_ISL_877647, EPI_ISL_1068001                                                                                                                                                                |                                                                                                                                                                                         |                                                                                                                                                                                                 | Wong; Justin T. Landis; Linda Pluta; Melissa B. Miller; Patricio Cano; Razia Moorad; Ryan McNamara; Shawn Hawken                                                                                                                                                                                                                                                                                                                                                                                                                                                                                  |
| EPI_ISL_911580                                                                                                                                                                                 | Clinical Molecular Microbiology Laboratory, UNC Hospitals                                                                                                                               | Jeremy Wang                                                                                                                                                                                     | Alexander Rubinsteyn; Colleen Rice; Corbin Jones; Jason Smedberg; Jeremy Wang; Melissa Miller; Robert Hagan                                                                                                                                                                                                                                                                                                                                                                                                                                                                                       |
| EPI_ISL_447410                                                                                                                                                                                 | Clinical Virology Unit, Hadassah Hebrew University Medical Center                                                                                                                       | Stern Lab                                                                                                                                                                                       | Stern Lab                                                                                                                                                                                                                                                                                                                                                                                                                                                                                                                                                                                         |
| EPI_ISL_710244, EPI_ISL_771159, EPI_ISL_983842, EPI_ISL_983849                                                                                                                                 | Colorado Department of Public Health and Environment                                                                                                                                    | Colorado Department of Public Health and Environment                                                                                                                                            | Diana Ir; Emily A. Travanty; Laura Bankers; Molly C. Hetherington-Rauth; Sarah Elizabeth Totten; Shannon Ely; Shannon R. Matzinger                                                                                                                                                                                                                                                                                                                                                                                                                                                                |
| EPI_ISL_632255, EPI_ISL_632262, EPI_ISL_632263, EPI_ISL_632265, EPI_ISL_632284, EPI_ISL_632285, EPI_ISL_678265, EPI_ISL_681303, EPI_ISL_682299, EPI_ISL_682309, EPI_ISL_682315, EPI_ISL_684033 |                                                                                                                                                                                         |                                                                                                                                                                                                 |                                                                                                                                                                                                                                                                                                                                                                                                                                                                                                                                                                                                   |
| see above                                                                                                                                                                                      | Communicable Disease Laboratory, Public Health Directorate                                                                                                                              | Communicable Disease Laboratory, Public Health Directorate                                                                                                                                      | AlAbbas, Z.; AlHujairi, Z.; AITaif, Z.; AlWasti, H.; Altaif, Z.; Alwasti, H.                                                                                                                                                                                                                                                                                                                                                                                                                                                                                                                      |
| EPI_ISL_1121323                                                                                                                                                                                | Complexo Hospitalar Padre Bentode Guarulhos                                                                                                                                             | Instituto Adolfo Lutz, Interdisciplinary Procedures Center, Strategic Laboratory                                                                                                                | Caio Vinicius Dias Lopes; Claudia Regina Gonçalves; Claudio Tavares Sacchi; Erica Valessa Ramos Gomes; Karoline Rodrigues Campos                                                                                                                                                                                                                                                                                                                                                                                                                                                                  |
| EPI_ISL_872192                                                                                                                                                                                 | Conjunto Hospitalar do Mandaqui de Sao Paulo                                                                                                                                            | Instituto Adolfo Lutz, Interdisciplinary Procedures Center, Strategic Laboratory                                                                                                                | Ana Lucia de Carvalho Avelino; Claudia Regina Gonçalves; Claudio Tavares Sacchi; Erica Valessa Ramos Gomes; Fabiana Cristina Pereira dos Santos; Karoline Rodrigues Campos; Katia Correa de Oliveira Santos                                                                                                                                                                                                                                                                                                                                                                                       |
| EPI_ISL_729779                                                                                                                                                                                 | Connecticut Department of Health                                                                                                                                                        | Grubagh Lab - Yale School of Public Health                                                                                                                                                      | Adam Moore; Akiko Iwasaki; Albert Ko; Alice Lu; Allison Nelson; Anderson Brito; Anne Wylie; Annie Watkins; Arnau Casanovas; Catherine Muenker; Chaney Kalinich; Chantal Vogels; Charlese Dela Cruz; Isabel Ott; Joseph Fauver; Maria Tokuyama; Mary Petrone; Nathan Grubaugh; Patrick Wong; Peiwen Lu; Richard Martinello; Saad Omer; Shelli Farhadian; Tara Alpert                                                                                                                                                                                                                               |
| EPI_ISL_1017647, EPI_ISL_1067667, EPI_ISL_1080459                                                                                                                                              | Connecticut Veterans' Affairs Hospital                                                                                                                                                  | Grubagh Lab - Yale School of Public Health                                                                                                                                                      | Chantal Vogels; Danielle Plank; Isabel Ott; Joseph Fauver; Mary Petrone; Nathan Grubaugh; Shaile Gupta; Tara Alpert                                                                                                                                                                                                                                                                                                                                                                                                                                                                               |
| EPI_ISL_1116460                                                                                                                                                                                | County Emergency Clinical Hospital of Tg. Mures                                                                                                                                         | National Institute of Infectious Diseases-Prof. Dr. Matei Bals Molecular Diagnostics Laboratory                                                                                                 | Andreea Tudor; Corina Casanguiu; Dan Otelea; Leontina Banica; Marius Surleac; Petre Milu; Simona Paraschiv                                                                                                                                                                                                                                                                                                                                                                                                                                                                                        |
| EPI_ISL_735493                                                                                                                                                                                 | Cox's Bazar Medicila College                                                                                                                                                            | Central Biological Research Laboratory and Department of Biochemistry and Molecular Biology Central Biological Research Laboratory and Department of Biochemistry and Molecular Biology         | H. M. Abdullah Al Masud; Imam Hossen; Md. Arif Hossain; Md. Imranul Hoq; Md. Khondakar Raziur Rahman; Md. Omer Faruq; Mohammad Omar Faruque; Robiul Hasan Bhuiyan; Sajib Rudra; Shanta Paul                                                                                                                                                                                                                                                                                                                                                                                                       |
| EPI_ISL_1084759, EPI_ISL_1091192, EPI_ISL_1091222, EPI_ISL_1091234, EPI_ISL_1091240                                                                                                            | Croatian Institute of Public Health                                                                                                                                                     | Croatian Institute of Public Health                                                                                                                                                             | Irena Tabain; Ivana Ferenak                                                                                                                                                                                                                                                                                                                                                                                                                                                                                                                                                                       |
| EPI_ISL_833169                                                                                                                                                                                 | DB Diagnosticos do Brasil                                                                                                                                                               | Instituto Adolfo Lutz, Interdisciplinary Procedures Center, Strategic Laboratory                                                                                                                | Claudia Regina Gonçalves; Claudio Tavares Sacchi; Erica Valessa Ramos Gomes; Karoline Rodrigues Campos                                                                                                                                                                                                                                                                                                                                                                                                                                                                                            |
| EPI_ISL_1060910, EPI_ISL_1060926                                                                                                                                                               | DB Diagnosticos do Brasil                                                                                                                                                               | Instituto de Medicina Tropical de Sao Paulo                                                                                                                                                     | Brazil-UK Centre for Arbovirus Discovery Diagnosis Genomics and Epidemiology (CADDE) Genomic Network - Instituto de Medicina Tropical                                                                                                                                                                                                                                                                                                                                                                                                                                                             |
| EPI_ISL_804819, EPI_ISL_804820, EPI_ISL_804823                                                                                                                                                 | DB Diagnosticos do Brasil                                                                                                                                                               | Laboratório de Parasitologia Médica - Instituto de Medicina Tropical - Universidade de São Paulo                                                                                                | Andrew Rambaut; CADDE Genomic Network; CDL; Camila A. Maia da Silva; Cecília da Cunha Camilo; DB; Darlan Candido; Erika Regina Manuli; Ester C. Sabino; Flávia Cristina Sales; HEMOAM; Ingra Morales Claro; Lucas A. Moyses Franco; Maria do Perpétuo Socorro Sampaio Carvalho; Myuki Alfaiá Esashika Crispim; Nelson Abraham Fraiji; Nelson Gaburo; Nick Loman; Nuno Faria; Oliver G. Pybus; Pamela dos Santos Andrade; Renato A. Santana; Thais de Moura Coletti                                                                                                                                |
| EPI_ISL_804868, EPI_ISL_804926, EPI_ISL_1133117                                                                                                                                                | DC Public Health Lab/ Dept. of Forensic Sciences                                                                                                                                        | DC Public Health Lab/ Dept. of Forensic Sciences                                                                                                                                                | Brittany Hamilton; Connie Maza; David Payne; Elizabeth Zelaya; Janis Doss; Jocelyn Hauser; Monica Mann; Sarah Scott; Scott Nguyen                                                                                                                                                                                                                                                                                                                                                                                                                                                                 |
| EPI_ISL_903969                                                                                                                                                                                 | DC Public Health Lab/ Dept. of Forensic Sciences                                                                                                                                        | Genomics and Discovery, Respiratory Viruses Branch, Division of Viral Diseases, Centers for Disease Control and Prevention                                                                      | Anna Montmayeur; Anna Uehara; Ben L. Rambo-Martin; Clinton R. Paden; Dhvani Batra; Haibin Wang; Jasmine Padilla; Jing Zhang; Justin Lee; Krista Queen; Lori Rowe; Mark Burroughs; Mili Sheth; Peter W. Cook; Rachel Marine; Sarah Nobles; Suxiang Tong; Yan Li; Ying Tao                                                                                                                                                                                                                                                                                                                          |
| EPI_ISL_576178                                                                                                                                                                                 | DC Public Health Lab/ Dept. of Forensic Sciences                                                                                                                                        | Pathogen Discovery, Respiratory Viruses Branch, Division of Viral Diseases, Centers for Disease Control and Prevention                                                                          | Anna Uehara; Brian Lynch; Clinton R. Paden; Haibin Wang; Jing Zhang; Krista Queen; Peter Cook; Suxiang Tong; Yan Li; Ying Tao                                                                                                                                                                                                                                                                                                                                                                                                                                                                     |
| EPI_ISL_683938                                                                                                                                                                                 | DOHMH Morrisania                                                                                                                                                                        | New York City Public Health Laboratory                                                                                                                                                          | Jade Wang; et al.                                                                                                                                                                                                                                                                                                                                                                                                                                                                                                                                                                                 |
| EPI_ISL_794661                                                                                                                                                                                 | DRECCION DE SANIDAD POLICIA NACIONAL                                                                                                                                                    | Instituto Nacional de Salud - Dirección de Investigación en Salud Pública                                                                                                                       | Carlos Franco-Muñoz; Diego A. Álvarez-Díaz; Diego Andrés Prada; Gerardo Santamaría; Jonathan Reales; Julian Naizaque; Katherine Laiton-Donato; Magdalena Wiesner; Marcela Mercado-Reyes; Maria T. Herrera; Martha Lucia Ospina Martinez; Mauricio Pacheco Montealegre; Paola Muñoz-Laiton; Sheryl Corchuelo                                                                                                                                                                                                                                                                                       |
| EPI_ISL_416542                                                                                                                                                                                 | Dasman Diabetes Institute                                                                                                                                                               | Dasman Diabetes Institute                                                                                                                                                                       | Ebba AlOzairi; Fahd Al-Mulla; Motasem Melhem; Qais Al-Duwairi; Rasheeba Iqbal; Sara Al-Qabandi; Sumi John                                                                                                                                                                                                                                                                                                                                                                                                                                                                                         |
| EPI_ISL_476891                                                                                                                                                                                 | Defence Research & Development Establishment (DRDE)                                                                                                                                     | Defence Research & Development Establishment (DRDE)                                                                                                                                             | Ambuj Shrivastava; Jyoti S. Kumar; Paban Kumar Dash; Shashi Sharma; Sushil Kumar Sharma                                                                                                                                                                                                                                                                                                                                                                                                                                                                                                           |
| EPI_ISL_576227, EPI_ISL_708450, EPI_ISL_812290                                                                                                                                                 | Delaware Public Health Lab                                                                                                                                                              | Delaware Public Health Lab                                                                                                                                                                      | Gregory Hovan                                                                                                                                                                                                                                                                                                                                                                                                                                                                                                                                                                                     |
| EPI_ISL_985258                                                                                                                                                                                 | Delaware Public Health Laboratory (DPHL)                                                                                                                                                | Delaware Public Health Lab                                                                                                                                                                      | Gregory Hovan                                                                                                                                                                                                                                                                                                                                                                                                                                                                                                                                                                                     |
| EPI_ISL_430802                                                                                                                                                                                 | Departamento de Biología y genética molecular, IACA Laboratorios.                                                                                                                       | Área de Secuenciación del Laboratorio de Virología del Hospital de Niños Dr. Ricardo Gutiérrez on behalf of 'Proyecto Argentino Interinstitucional de genómica de SARS-CoV-2' (PAIS Consortium) | A; AS; E; Goya; LE; Lusso; MI; MS; Masciovecchio MV; Mistchenko; Nabaes Jodar; Natale; S; Streitenberger ER; Suárez; Tittarelli; Valinotto; Viegas, M.                                                                                                                                                                                                                                                                                                                                                                                                                                            |
| EPI_ISL_420140, EPI_ISL_420144                                                                                                                                                                 | Department for Virology, Molecular Biology and Genome Research, R. G. Lugar Center for Public Health Research, National Center for Disease Control and Public Health (NCDC) of Georgia. | Department for Virology, Molecular Biology and Genome Research, R. G. Lugar Center for Public Health Research, National Center for Disease Control and Public Health (NCDC) of Georgia.         | Adam Kotorashvili; Amiran Gamkrelidze; Amiran Gamkrelidze.; Ana Papiakuri; Ann Machabishvili; Anna Kasradze; Davit Tsaguria; Ekaterine Khmaladze; Ekaterine Zangaladze; Ekaterine Zghenti; Giorgi Tomashvili; Gvantsa Brachveli; Gvantsa Chanturia; Irma Burjanadze; Ketevan Sidamonidze; Khatuna Zakhshvili; Lela Sabadze; Lela Urushadze; Magda Dgebuadze; Maia Alkhazashvili; Mari Gavashelidze; Mariam Zakalashvili; Marine Murtskhaladze; Meri Pantsulaia; Nato Kotaria; Nino Berishvili; Paata Imnadze; Roena Sukhishvili; Tamar Jashishvili; Tata Imnadze; Tea Tvedoradze                  |
| EPI_ISL_471529, EPI_ISL_481380, EPI_ISL_754180, EPI_ISL_754181, EPI_ISL_763062, EPI_ISL_1048367                                                                                                | Department for Virology, Molecular Biology and Genome Research, R. G. Lugar Center for Public Health Research, National Center for Disease Control and Public Health (NCDC) of Georgia. | Department for Virology, Molecular Biology and Genome Research, R. G. Lugar Center for Public Health Research, National Center for Disease Control and Public Health (NCDC) of Georgia.         | Adam Kotorashvili; Amiran Gamkrelidze.; Ana Papiakuri; Ann Machabishvili; Anna Kasradze; Davit Tsaguria; Ekaterine Khmaladze; Ekaterine Zangaladze; Ekaterine Zghenti; Giorgi Gogoladze; Giorgi Tomashvili; Gvantsa Brachveli; Gvantsa Chanturia; Irma Burjanadze; Ketevan Sidamonidze; Khatuna Zakhshvili; Lela Sabadze; Lela Urushadze; Magda Dgebuadze; Maia Alkhazashvili; Mari Gavashelidze; Mariam Zakalashvili; Marine Murtskhaladze; Meri Pantsulaia; Nato Kotaria; Nino Berishvili; Paata Imnadze; Roena Sukhishvili; Salome Javashvili; Tamar Jashishvili; Tata Imnadze; Tea Tvedoradze |
| EPI_ISL_515096, EPI_ISL_515103                                                                                                                                                                 | Department of Biochemistry, Cell and Molecular Biology                                                                                                                                  | WACCBIP, University of Ghana                                                                                                                                                                    | A.K.; Adu, B.; Amenga-Etego; Ampofo, W.; Amuzu; Anang; Arjarquah, A.; Asante, I.; Awandare; Bediako, Y.; Boatemaa, L.; Bonney, E.; Bonney, K.; C.M.; D.S.; Eshun, M.; G.A.; G.B.; J.K.; J.M.; Kotey, E.; Kumordjie, S.; Kyei; L.N.; Magnussen, V.; Morang'a; Mutungi; Ngoi; Quashie, P.; Tei-Maya, F.                                                                                                                                                                                                                                                                                             |
| EPI_ISL_884839, EPI_ISL_884841, EPI_ISL_884853, EPI_ISL_944648, EPI_ISL_944660, EPI_ISL_944666, EPI_ISL_944668, EPI_ISL_944687, EPI_ISL_944697, EPI_ISL_944699, EPI_ISL_944706, EPI_ISL_944728 |                                                                                                                                                                                         |                                                                                                                                                                                                 |                                                                                                                                                                                                                                                                                                                                                                                                                                                                                                                                                                                                   |
| see above                                                                                                                                                                                      | Department of Biochemistry, Cell and Molecular Biology, West African Centre for Cell Biology of Infectious Pathogens (WACCBIP), University of Ghana                                     | Department of Biochemistry, Cell and Molecular Biology, West African Centre for Cell Biology of Infectious Pathogens (WACCBIP), University of Ghana                                             | A.-K.; A.B.; Abass; Adusei-Poku, M.; Akoriye; Amenga-Etego; Amoako, E.; Ampofo; Amuzu; Asante, I.; Awandare; Bediako, Y.; Boakyie; Bonney; Bonney, E.; C.M.; D.S.; Diallo; E.B.; G.A.; J.H.; J.K.; J.M.; Kibinge, N.; Kumi-Ansah, F.; L.N.; Magnussen, V.; Mohammed, A.; Morang'a, N.T.; Ndam; Ngoi; O.D.; Odom; Odom, T.; Ofori-Boadu, L.; Quansah; Quashie, P.; S.K.; Said, S.; Tapela, K.; Tei-Maya, F.; W.K.                                                                                                                                                                                  |
| EPI_ISL_498138, EPI_ISL_626237, EPI_ISL_644619, EPI_ISL_644620, EPI_ISL_644621, EPI_ISL_707727, EPI_ISL_722966, EPI_ISL_925398                                                                 |                                                                                                                                                                                         |                                                                                                                                                                                                 |                                                                                                                                                                                                                                                                                                                                                                                                                                                                                                                                                                                                   |
| see above                                                                                                                                                                                      | Department of Clinical Microbiology                                                                                                                                                     | GIGA Medical Genomics                                                                                                                                                                           | Axelle Chaslain; Bouchra Boujemla; Cécile Meex; Céline Fombellida-Lopez; Keith Durkin; Maria Artesi; Marie-Pierre Hayette; Pierrette Melin; Raphaël Boreux; Sébastien Bontems; Vincent Bours; Vincent Bours.                                                                                                                                                                                                                                                                                                                                                                                      |
| EPI_ISL_417184, EPI_ISL_419214                                                                                                                                                                 | Department of Clinical Pathology, Pamela Youde Nethersole                                                                                                                               | Department of Health Technology and Informatics, Faculty of                                                                                                                                     | Alan Ka-Lun WU; Alex Yat-Man HO; Barry Kin-Chung WONG; David Ho-Keung SHUM; Eugene Yuk-Keung TSO; Gilman Kit-Hang SIU; Hiu-Yin LAO;                                                                                                                                                                                                                                                                                                                                                                                                                                                               |

|                                                                                                                                                                                                                                                                                                                                                 |                                                                                                                                         |                                                                                                                                                       |                                                                                                                                                                                                                                                                                                                                                                                                                                                                                                                                                                  |                                                                                                                                                                                                                                                                                                                                                                                                                                          |
|-------------------------------------------------------------------------------------------------------------------------------------------------------------------------------------------------------------------------------------------------------------------------------------------------------------------------------------------------|-----------------------------------------------------------------------------------------------------------------------------------------|-------------------------------------------------------------------------------------------------------------------------------------------------------|------------------------------------------------------------------------------------------------------------------------------------------------------------------------------------------------------------------------------------------------------------------------------------------------------------------------------------------------------------------------------------------------------------------------------------------------------------------------------------------------------------------------------------------------------------------|------------------------------------------------------------------------------------------------------------------------------------------------------------------------------------------------------------------------------------------------------------------------------------------------------------------------------------------------------------------------------------------------------------------------------------------|
|                                                                                                                                                                                                                                                                                                                                                 | Eastern Hospital                                                                                                                        | Health and Social Science, The Hong Kong Polytechnic University                                                                                       | Kam-Tong YIP; Kam-Tong Yip; Kenneth Siu-Sing LEUNG; Kingsley King-Gee TAM; Kit-Man SIN; Kitty Sau-Chun FUNG; Kwok-Cheung LUNG; Lam-Kwong LEE; Man-Chun CHAN; Ming-Pan CHOI; Miranda Chong-Yee YAU; Raymond Wai-To LIU; Sandy Ka-Yee CHAU; Shea Ping YIP; Tak-Lun QUE; Tak-Lun Que; Timothy Ting-Leung NG; Wai-Shing LEUNG; Wing Cheong YAM; Wing-Kin TO; Yuk-Yung NG                                                                                                                                                                                             |                                                                                                                                                                                                                                                                                                                                                                                                                                          |
| EPI_ISL_1018119, EPI_ISL_1018292, EPI_ISL_1018302, EPI_ISL_1018305, EPI_ISL_1019647, EPI_ISL_1019861, EPI_ISL_1019869, EPI_ISL_1020224, EPI_ISL_1020259, EPI_ISL_1020281                                                                                                                                                                        | see above                                                                                                                               | Department of Health Technology and Informatics, The Hong Kong Polytechnic University                                                                 | Department of Health Technology and Informatics, The Hong Kong Polytechnic University                                                                                                                                                                                                                                                                                                                                                                                                                                                                            | Alan Ka-Lun Wu; Alex Yat-Man Ho; Barry Kin-Chung Wong; Chloe Toi-Mei Chan; David Ho-Keung Shum; Denise Sze-Hang Wong; Gilman Kit-Hang Siu; Hiu-Yin Lao; Jake Siu-Lun Leung; Kam-Tong Yip; Kenneth Siu-Sing Leung; Kingsley King-Gee Tam; Kitty Sau-Chun Fung; Kristine Luk; Lam-Kwong Lee; Miranda Chong-Yee Yau; Sandy Ka-Yee Chau; Shea Ping Yip; Tak-Lun Que; Timothy Ting-Leung Ng; Wing Cheong Yam; Wing-Kin To; Yvette Wai-Man Lai |
| EPI_ISL_417444                                                                                                                                                                                                                                                                                                                                  | Department of Healthcare Biotechnology, National University of Sciences and Technology (NUST)                                           | Department of Healthcare Biotechnology, National University of Sciences and Technology (NUST)                                                         | Corman; Ghani, E.; H.A.; Janjua; Javed, A.; Niazi; S.K.; Saqib, M.; V.M. and Zohaib, A.                                                                                                                                                                                                                                                                                                                                                                                                                                                                          |                                                                                                                                                                                                                                                                                                                                                                                                                                          |
| EPI_ISL_412974                                                                                                                                                                                                                                                                                                                                  | Department of Infectious Diseases, Istituto Superiore di Sanità, Rome, Italy                                                            | Virology Laboratory, Scientific Department, Army Medical Center                                                                                       | Andrea Ciammaruconi; Antonella Fortunato; Antonella Marchi; Concetta Fabiani; Eleonora Benedetti; Filippo Molinari; Florigio Lista; Giancarlo Petralito; Giovanni Faggioni; Paola Stefanelli; Riccardo De Santis; Silvia Fillo; Stefano Fiore                                                                                                                                                                                                                                                                                                                    |                                                                                                                                                                                                                                                                                                                                                                                                                                          |
| EPI_ISL_893371                                                                                                                                                                                                                                                                                                                                  | Department of Infectious Diseases, Kobe Institute of Health                                                                             | Department of Infectious Diseases, Kobe Institute of Health                                                                                           | Kentaro Itokawa; Makoto Kuroda; Masanori Hashino; Rina Tanaka; Ryohei Nomoto; Tomotada Iwamoto; Tsuyoshi Sekizuka                                                                                                                                                                                                                                                                                                                                                                                                                                                |                                                                                                                                                                                                                                                                                                                                                                                                                                          |
| EPI_ISL_479856                                                                                                                                                                                                                                                                                                                                  | Department of Infectious Diseases, Kobe Institute of Health                                                                             | Pathogen Genomics Center, National Institute of Infectious Diseases                                                                                   | Hajime Kamiya; Kentaro Itokawa; Makoto Kuroda; Masanori Hashino; Motoi Suzuki; Rina Tanaka; Ryohei Nomoto; Tsuyoshi Sekizuka                                                                                                                                                                                                                                                                                                                                                                                                                                     |                                                                                                                                                                                                                                                                                                                                                                                                                                          |
| EPI_ISL_411219, EPI_ISL_411220                                                                                                                                                                                                                                                                                                                  | Department of Infectious and Tropical Diseases, Bichat Claude Bernard Hospital, Paris                                                   | Laboratoire Virpath, CIRI U111, UCBL1, INSERM, CNRS, ENS Lyon                                                                                         | Alexandre Gaymard; Aurélien Traversier; Bruno Lina; Julien Fourret; Manuel Rosa-Calatrava; Olivier Terrier; Xavier Lescure; Yazdan Yazdanpanah                                                                                                                                                                                                                                                                                                                                                                                                                   |                                                                                                                                                                                                                                                                                                                                                                                                                                          |
| EPI_ISL_1007671                                                                                                                                                                                                                                                                                                                                 | Department of Internal Medicine, College of Medicine, Chosun University                                                                 | Department of Internal Medicine, College of Medicine, Chosun University                                                                               | Dong-Min Kim                                                                                                                                                                                                                                                                                                                                                                                                                                                                                                                                                     |                                                                                                                                                                                                                                                                                                                                                                                                                                          |
| EPI_ISL_516804                                                                                                                                                                                                                                                                                                                                  | Department of Laboratory Medicine, Tan Tock Seng Hospital                                                                               | Department of Laboratory Medicine, Tan Tock Seng Hospital                                                                                             | Barkham TMS; Chen YYC; Li C; Maurer-Stroh S; Nagarajan N; Sessions OM; Tang WY; Zair X                                                                                                                                                                                                                                                                                                                                                                                                                                                                           |                                                                                                                                                                                                                                                                                                                                                                                                                                          |
| EPI_ISL_1008259, EPI_ISL_1008335                                                                                                                                                                                                                                                                                                                | Department of Laboratory Medicine, Division of Clinical Virology, University of Medicine, Vienna                                        | Berghaler laboratory, CeMM Research Center for Molecular Medicine of the Austrian Academy of Sciences                                                 | Andreas Berghaler; Anna Schedl; Bekir Erguner; Benedikt Agerer; Christoph Bock; Jan Laine; Lukas Endler; Maelle Le Moing; Martin Senekowitsch; Michael Schuster; Thomas Penz                                                                                                                                                                                                                                                                                                                                                                                     |                                                                                                                                                                                                                                                                                                                                                                                                                                          |
| EPI_ISL_693302, EPI_ISL_693303, EPI_ISL_693304, EPI_ISL_693305, EPI_ISL_738065, EPI_ISL_872591, EPI_ISL_872592, EPI_ISL_872593, EPI_ISL_872595                                                                                                                                                                                                  | see above                                                                                                                               | Department of Laboratory Medicine, National Taiwan University Hospital                                                                                | Microbial Genomics Core Lab, National Taiwan University Centers of Genomic and Precision Medicine                                                                                                                                                                                                                                                                                                                                                                                                                                                                | Chiao-Ling Li; Pei-Jer Chen; Shan-Chwen Chang; Shiou-Hwei Yeh; Sui-Yuan Chang; Ya-Yun Lai; You-Yu Lin                                                                                                                                                                                                                                                                                                                                    |
| EPI_ISL_648763, EPI_ISL_648791, EPI_ISL_648795                                                                                                                                                                                                                                                                                                  | Department of Laboratory Medicine, Tan Tock Seng Hospital                                                                               | Department of Laboratory Medicine, Tan Tock Seng Hospital                                                                                             | Barkham TMS; Chen YYC; Li C; Lim JX; Maurer-Stroh S; Nagarajan N; Sessions OM; Tang WY; Zair X                                                                                                                                                                                                                                                                                                                                                                                                                                                                   |                                                                                                                                                                                                                                                                                                                                                                                                                                          |
| EPI_ISL_710483, EPI_ISL_710484                                                                                                                                                                                                                                                                                                                  | Department of Medical Laboratory Sciences, Arab American University                                                                     | Department of Medical Laboratory Sciences, Arab American University                                                                                   | Al-Jawabreh, A.; Al-Jawabreh, H.; Dumaidi, K.; Ereqat, S.; Nasereddin, A.                                                                                                                                                                                                                                                                                                                                                                                                                                                                                        |                                                                                                                                                                                                                                                                                                                                                                                                                                          |
| EPI_ISL_796717                                                                                                                                                                                                                                                                                                                                  | Department of Medical Microbiology, St. Olavs hospital                                                                                  | Norwegian Institute of Public Health, Department of Virology                                                                                          | Atiya R Ali; Hilde Elshaug; Hilde Vollan; Kamilla Heddeland Instefjord; Karoline Bragstad; Kathrine Stene-Johansen; Marie Paulsen Madsen; Olav Hungnes; Rasmus Riis Kopperud                                                                                                                                                                                                                                                                                                                                                                                     |                                                                                                                                                                                                                                                                                                                                                                                                                                          |
| EPI_ISL_1027637, EPI_ISL_1027638, EPI_ISL_1027646, EPI_ISL_1027653, EPI_ISL_1027654, EPI_ISL_1027657                                                                                                                                                                                                                                            | Department of Microbiology, National Institute for Public Health of Kosovo                                                              | Charité Universitätsmedizin Berlin, Institut für Virologie                                                                                            | Barbara Mühlemann; Christian Drosten; Donjeta Hajdari; Julia Schneider; Jörn Beheim-Schwarzbach; Talitha Veith; Terry Jones; Victor M Corman; Xhevat Jakupi; Zana Deva                                                                                                                                                                                                                                                                                                                                                                                           |                                                                                                                                                                                                                                                                                                                                                                                                                                          |
| EPI_ISL_497857, EPI_ISL_497861, EPI_ISL_498271, EPI_ISL_510540, EPI_ISL_1034440, EPI_ISL_1034528, EPI_ISL_1034607, EPI_ISL_1034658                                                                                                                                                                                                              | see above                                                                                                                               | Department of Microbiology, The University of Hong Kong                                                                                               | Department of Microbiology, The University of Hong Kong                                                                                                                                                                                                                                                                                                                                                                                                                                                                                                          | Kelvin K.W. To; Kwok-Yung Yuen                                                                                                                                                                                                                                                                                                                                                                                                           |
| EPI_ISL_1008285, EPI_ISL_1008286, EPI_ISL_1008316, EPI_ISL_1117807, EPI_ISL_1117809, EPI_ISL_1117891, EPI_ISL_1118083                                                                                                                                                                                                                           | see above                                                                                                                               | Department of Microbiology, University Innsbruck                                                                                                      | Berghaler laboratory, CeMM Research Center for Molecular Medicine of the Austrian Academy of Sciences                                                                                                                                                                                                                                                                                                                                                                                                                                                            | Andreas Berghaler; Anna Schedl; Bekir Erguner; Benedikt Agerer; Christoph Bock; Jan Laine; Lukas Endler; Maelle Le Moing; Martin Senekowitsch; Michael Schuster; Thomas Penz                                                                                                                                                                                                                                                             |
| EPI_ISL_463742, EPI_ISL_463747                                                                                                                                                                                                                                                                                                                  | Department of Molecular Virology, Cyprus Institute of Neurology and Genetics                                                            | Department of Molecular Virology, Cyprus Institute of Neurology and Genetics                                                                          | Christina Christodoulou; Christina Tryfonos; Dana Koptides; George Krashias; Jan Richter; Stavros Bashiardes                                                                                                                                                                                                                                                                                                                                                                                                                                                     |                                                                                                                                                                                                                                                                                                                                                                                                                                          |
| EPI_ISL_853819                                                                                                                                                                                                                                                                                                                                  | Department of Pathology, Landeskrankenhaus Graz II, Medical University Graz                                                             | Berghaler laboratory, CeMM Research Center for Molecular Medicine of the Austrian Academy of Sciences                                                 | Alexander Lercher; Alexandra Popa; Andreas Berghaler; Anna Schedl; Benedikt Agerer; Christoph Bock; Jakob-Wendelin Genger; Jan Laine; Lukas Endler; Martin Senekowitsch; Michael Schuster; Thomas Penz                                                                                                                                                                                                                                                                                                                                                           |                                                                                                                                                                                                                                                                                                                                                                                                                                          |
| EPI_ISL_594185, EPI_ISL_596451                                                                                                                                                                                                                                                                                                                  | Department of Pathology, School of Medicine, Imam Khomeini Hospital, Tehran University of Medical Sciences                              | Genetics Research Center, University of Social Welfare and Rehabilitation Sciences                                                                    | Ali Jafarpour; Alireza Abdollahi; Azam Ghaziasad; Azam Ghaziasadi; Azar Hadadi; Hossein Najmabadi; Khadijeh Jalalvand; Kimia Kahrizi; Marzieh Mohseni; Reza Najafipour; Saber Soltani; Seyed Mohammad Jazayeri; Seyedeh elham Mortazavi; Zohreh Fattahi                                                                                                                                                                                                                                                                                                          |                                                                                                                                                                                                                                                                                                                                                                                                                                          |
| EPI_ISL_582513, EPI_ISL_1121990, EPI_ISL_1122014                                                                                                                                                                                                                                                                                                | Department of Respiratory and other Viral Infections of L.V.Gromashevsky Institute of Epidemiology & Infectious Diseases NAMS of Ukrain | Department of Respiratory and other Viral Infections of L.V.Gromashevsky Institute of Epidemiology & Infectious Diseases NAMS of Ukrain, JSC "Farmak" | Alla Mironenko; Andriy Goy; Ihor Kravchuk; Larysa Radchenko; Ludmyla Bolotova; Nataliia Teteriuk                                                                                                                                                                                                                                                                                                                                                                                                                                                                 |                                                                                                                                                                                                                                                                                                                                                                                                                                          |
| EPI_ISL_732948, EPI_ISL_732952, EPI_ISL_732956                                                                                                                                                                                                                                                                                                  | Department of Tropical Parasitology                                                                                                     | Laboratory of Recombinant Vaccines                                                                                                                    | Boguslaw Szewczyk; Kirsi Aaltonen; Lukasz Rabalski; Maciej Grzybek; Maciej Kosinski; Ravi Kant; Tarja Sironen; Teemu Smura                                                                                                                                                                                                                                                                                                                                                                                                                                       |                                                                                                                                                                                                                                                                                                                                                                                                                                          |
| EPI_ISL_450200                                                                                                                                                                                                                                                                                                                                  | Department of Virology                                                                                                                  | Department of Virology                                                                                                                                | Ackermann, N.; Antwerpen, M.; Bengs, K.; Berger, A.; Boehm, S.; Boehmer; Boender; Buchholz, U.; Cai, W.; Corman; D.V.; Dangel, A.; Drosten, C.; Eberle, U.; Fingerle, V.; Grah, A.; Haas, W.; Hamouda, O.; Hoch, M.; Hoermansdorfer, S.; Ippisch, S.; Jones; Katz, K.; Konrad, R.; Liebl, B.; M.M.; Marosevic; Muehleemann, B.; Muller, N.; Poertner, K.; Protzer, U.; Reich, A.; Rexroth, U.; Schneider, J.; Sing, A.; T.C.; T.S.; Treis, B.; V.M.; Veith, T.; Walter, M.; Wicklein, B.; Woelfel, R.; Woudenberg, T.; Zapf, A.; Zeitmann, N.; an der Heiden, M. |                                                                                                                                                                                                                                                                                                                                                                                                                                          |
| EPI_ISL_481674, EPI_ISL_481708, EPI_ISL_481715, EPI_ISL_732571, EPI_ISL_732580, EPI_ISL_732618, EPI_ISL_732639, EPI_ISL_737067, EPI_ISL_756247, EPI_ISL_757298, EPI_ISL_757378, EPI_ISL_757379, EPI_ISL_862053, EPI_ISL_902777, EPI_ISL_902824, EPI_ISL_902839, EPI_ISL_902866, EPI_ISL_995860, EPI_ISL_995931, EPI_ISL_995939, EPI_ISL_1082183 | see above                                                                                                                               | Department of Virology and Immunology, University of Helsinki and Helsinki University Hospital, Huslab Finland                                        | Department of Virology, Faculty of Medicine, University of Helsinki, Helsinki, Finland                                                                                                                                                                                                                                                                                                                                                                                                                                                                           | Essi Korhonen; Hanna Jarva; Hanna Liimatainen; Hannimari Kallio-Kokko; Harri Kangas; Hussein Alburkat; Jenni Virtanen; Maija Lappalainen; Maija Suvano; Olli Vapalahti; Pekka Ellonen; Phuoc Truong; Ravi Kant; Sari Hannula; Satu Kurkela; Teemu Smura                                                                                                                                                                                  |
| EPI_ISL_1015197                                                                                                                                                                                                                                                                                                                                 | Department of Virology, Pitié-Salpêtrière hospital                                                                                      | Department of Virology, Pitié-Salpêtrière hospital                                                                                                    | Anne-Geneviève Marcelin; Aude Jary; Karen Zafilaza; Stéphane Marot; Valentin Leducq; Vincent Calvez                                                                                                                                                                                                                                                                                                                                                                                                                                                              |                                                                                                                                                                                                                                                                                                                                                                                                                                          |
| EPI_ISL_855562                                                                                                                                                                                                                                                                                                                                  | Department of Virology, Principal Military Hospital of Instruction of Tunis                                                             | Bundeswehr Institute of Microbiology                                                                                                                  | Habiba Najja; Kilian Stoecker; Malena Bestehorn-Willmann; Markus H. Antwerpen; Mathias C. Walter; Roman Wölfel & Mohamed Ben Moussa; Simone Eckstein; Susann Handrick                                                                                                                                                                                                                                                                                                                                                                                            |                                                                                                                                                                                                                                                                                                                                                                                                                                          |
| EPI_ISL_757285, EPI_ISL_757286                                                                                                                                                                                                                                                                                                                  | Department of Virology, Public Health Laboratories Division                                                                             | Department of Virology, Public Health Laboratories Division                                                                                           | Aamer Ikram; Massab Umair; Muhammad Salman                                                                                                                                                                                                                                                                                                                                                                                                                                                                                                                       |                                                                                                                                                                                                                                                                                                                                                                                                                                          |
| EPI_ISL_871028, EPI_ISL_926050, EPI_ISL_926195, EPI_ISL_926756, EPI_ISL_973345, EPI_ISL_1022788, EPI_ISL_1024507, EPI_ISL_1024755, EPI_ISL_1065926, EPI_ISL_1067495                                                                                                                                                                             | see above                                                                                                                               | Department of Virus and Microbiological Special Diagnostics, Statens Serum Institut, Copenhagen, Denmark                                              | Aalborg University                                                                                                                                                                                                                                                                                                                                                                                                                                                                                                                                               | Danish Covid-19 Genome Consortium                                                                                                                                                                                                                                                                                                                                                                                                        |
| EPI_ISL_668918, EPI_ISL_683087, EPI_ISL_683089, EPI_ISL_683091, EPI_ISL_712628, EPI_ISL_712874, EPI_ISL_747562, EPI_ISL_748861, EPI_ISL_750137, EPI_ISL_793656, EPI_ISL_844392                                                                                                                                                                  | see above                                                                                                                               | Department of Virus and Microbiological Special Diagnostics, Statens Serum Institut, Copenhagen, Denmark                                              | Albertsen Lab, Department of Chemistry and Bioscience, Aalborg University, Denmark                                                                                                                                                                                                                                                                                                                                                                                                                                                                               | Danish Covid-19 Genome Consortium                                                                                                                                                                                                                                                                                                                                                                                                        |
| EPI_ISL_641396                                                                                                                                                                                                                                                                                                                                  | Department of Virus and Microbiological Special Diagnostics, Statens Serum Institut, Copenhagen, Denmark                                | Albertsen lab, Department of Chemistry and Bioscience, Aalborg University, Denmark                                                                    | Jannik Fonager; Morten Rasmussen; Thomas Bruun Rasmussen                                                                                                                                                                                                                                                                                                                                                                                                                                                                                                         |                                                                                                                                                                                                                                                                                                                                                                                                                                          |

|                                                                                                                                                                                                                                                                                                                                                                                                                                                                                                                                                                                                                                                                                                                                                                                                                                                                                                                                                                                                                                                                                                                                                                                                                                                                                                                                                                                                                                                                                                                                                                                                                                                                                                                                                                                                                                                                                                                                                                                                                                                                                                                                                                                                                                                                                                                                                                                                                                                                                                                                                                                                                                                                                                                                                                                                                                                                                                                                                                                                                                                                                                                                                                                                                                                                                                                                                                                                                                                                                                                                                                                                                                                                                                                                                                                                                                                                                                                                                                                                                                                                                                                                                                                                                                                                                                                                                                                                                                                                                                                                                                                                                                                                                                                                                                                                                                                                                                                                                                                                                                                                                                                                                                                                                                                                                                                                                                                                                                                                                                                                                                                                                                                                                                                                                                                                                                                                                                                                                                                                                                                                                                                                                                                                                                                                                                                                                                                                                                                                                                                                                                                                                                                                                                                                                                                                                                                                                                                                                                                                                                                                                                                                                                                                                                                                                                                                                                                                                                                                                                                                                                                                                                                                                                                                                                                                                                                                                                                                                                                                                                                                                                                                                                                                                                                                                                                                                                                                                                                                                                                                                                                                                                                                                                                                                                                                                                                                                                                                                                                                                                                                                                                                                                                                                                                                                                                                                                                                                                                                                                                                                                                                                                                                                                                                                                                                                                                                                                                                                                                                                                                                                                                                                                                                                                                                                                                                                                                                                                                                                                                                                                                                                                                                                                                                                                                                                                                                                                                                                                                                                                                                                                                                                                                                                                                                                                                                                                                                                                                                                                                                                                                                                                                                                                                                                 |                                                                                                                                        |                                                                                                                                        |                                                                                                                                                                                                                                                                                                                                                                                                                                                                                                          |
|-------------------------------------------------------------------------------------------------------------------------------------------------------------------------------------------------------------------------------------------------------------------------------------------------------------------------------------------------------------------------------------------------------------------------------------------------------------------------------------------------------------------------------------------------------------------------------------------------------------------------------------------------------------------------------------------------------------------------------------------------------------------------------------------------------------------------------------------------------------------------------------------------------------------------------------------------------------------------------------------------------------------------------------------------------------------------------------------------------------------------------------------------------------------------------------------------------------------------------------------------------------------------------------------------------------------------------------------------------------------------------------------------------------------------------------------------------------------------------------------------------------------------------------------------------------------------------------------------------------------------------------------------------------------------------------------------------------------------------------------------------------------------------------------------------------------------------------------------------------------------------------------------------------------------------------------------------------------------------------------------------------------------------------------------------------------------------------------------------------------------------------------------------------------------------------------------------------------------------------------------------------------------------------------------------------------------------------------------------------------------------------------------------------------------------------------------------------------------------------------------------------------------------------------------------------------------------------------------------------------------------------------------------------------------------------------------------------------------------------------------------------------------------------------------------------------------------------------------------------------------------------------------------------------------------------------------------------------------------------------------------------------------------------------------------------------------------------------------------------------------------------------------------------------------------------------------------------------------------------------------------------------------------------------------------------------------------------------------------------------------------------------------------------------------------------------------------------------------------------------------------------------------------------------------------------------------------------------------------------------------------------------------------------------------------------------------------------------------------------------------------------------------------------------------------------------------------------------------------------------------------------------------------------------------------------------------------------------------------------------------------------------------------------------------------------------------------------------------------------------------------------------------------------------------------------------------------------------------------------------------------------------------------------------------------------------------------------------------------------------------------------------------------------------------------------------------------------------------------------------------------------------------------------------------------------------------------------------------------------------------------------------------------------------------------------------------------------------------------------------------------------------------------------------------------------------------------------------------------------------------------------------------------------------------------------------------------------------------------------------------------------------------------------------------------------------------------------------------------------------------------------------------------------------------------------------------------------------------------------------------------------------------------------------------------------------------------------------------------------------------------------------------------------------------------------------------------------------------------------------------------------------------------------------------------------------------------------------------------------------------------------------------------------------------------------------------------------------------------------------------------------------------------------------------------------------------------------------------------------------------------------------------------------------------------------------------------------------------------------------------------------------------------------------------------------------------------------------------------------------------------------------------------------------------------------------------------------------------------------------------------------------------------------------------------------------------------------------------------------------------------------------------------------------------------------------------------------------------------------------------------------------------------------------------------------------------------------------------------------------------------------------------------------------------------------------------------------------------------------------------------------------------------------------------------------------------------------------------------------------------------------------------------------------------------------------------------------------------------------------------------------------------------------------------------------------------------------------------------------------------------------------------------------------------------------------------------------------------------------------------------------------------------------------------------------------------------------------------------------------------------------------------------------------------------------------------------------------------------------------------------------------------------------------------------------------------------------------------------------------------------------------------------------------------------------------------------------------------------------------------------------------------------------------------------------------------------------------------------------------------------------------------------------------------------------------------------------------------------------------------------------------------------------------------------------------------------------------------------------------------------------------------------------------------------------------------------------------------------------------------------------------------------------------------------------------------------------------------------------------------------------------------------------------------------------------------------------------------------------------------------------------------------------------------------------------------------------------------------------------------------------------------------------------------------------------------------------------------------------------------------------------------------------------------------------------------------------------------------------------------------------------------------------------------------------------------------------------------------------------------------------------------------------------------------------------------------------------------------------------------------------------------------------------------------------------------------------------------------------------------------------------------------------------------------------------------------------------------------------------------------------------------------------------------------------------------------------------------------------------------------------------------------------------------------------------------------------------------------------------------------------------------------------------------------------------------------------------------------------------------------------------------------------------------------------------------------------------------------------------------------------------------------------------------------------------------------------------------------------------------------------------------------------------------------------------------------------------------------------------------------------------------------------------------------------------------------------------------------------------------------------------------------------------------------------------------------------------------------------------------------------------------------------------------------------------------------------------------------------------------------------------------------------------------------------------------------------------------------------------------------------------------------------------------------------------------------------------------------------------------------------------------------------------------------------------------------------------------------------------------------------------------------------------------------------------------------------------------------------------------------------------------------------------------------------------------------------------------------------------------------------------------------------------------------------------------------------------------------------------------------------------------------------------------------------------------------------------------------------------------------------------------------------------------------------------------------------------------------------------------------------------------------------------------------------------------------------------------------------------------------------------------------------------------------------------------------------------------------------------------|----------------------------------------------------------------------------------------------------------------------------------------|----------------------------------------------------------------------------------------------------------------------------------------|----------------------------------------------------------------------------------------------------------------------------------------------------------------------------------------------------------------------------------------------------------------------------------------------------------------------------------------------------------------------------------------------------------------------------------------------------------------------------------------------------------|
| EPI_ISL_615827, EPI_ISL_616206, EPI_ISL_616665, EPI_ISL_616860, EPI_ISL_617284, EPI_ISL_619979                                                                                                                                                                                                                                                                                                                                                                                                                                                                                                                                                                                                                                                                                                                                                                                                                                                                                                                                                                                                                                                                                                                                                                                                                                                                                                                                                                                                                                                                                                                                                                                                                                                                                                                                                                                                                                                                                                                                                                                                                                                                                                                                                                                                                                                                                                                                                                                                                                                                                                                                                                                                                                                                                                                                                                                                                                                                                                                                                                                                                                                                                                                                                                                                                                                                                                                                                                                                                                                                                                                                                                                                                                                                                                                                                                                                                                                                                                                                                                                                                                                                                                                                                                                                                                                                                                                                                                                                                                                                                                                                                                                                                                                                                                                                                                                                                                                                                                                                                                                                                                                                                                                                                                                                                                                                                                                                                                                                                                                                                                                                                                                                                                                                                                                                                                                                                                                                                                                                                                                                                                                                                                                                                                                                                                                                                                                                                                                                                                                                                                                                                                                                                                                                                                                                                                                                                                                                                                                                                                                                                                                                                                                                                                                                                                                                                                                                                                                                                                                                                                                                                                                                                                                                                                                                                                                                                                                                                                                                                                                                                                                                                                                                                                                                                                                                                                                                                                                                                                                                                                                                                                                                                                                                                                                                                                                                                                                                                                                                                                                                                                                                                                                                                                                                                                                                                                                                                                                                                                                                                                                                                                                                                                                                                                                                                                                                                                                                                                                                                                                                                                                                                                                                                                                                                                                                                                                                                                                                                                                                                                                                                                                                                                                                                                                                                                                                                                                                                                                                                                                                                                                                                                                                                                                                                                                                                                                                                                                                                                                                                                                                                                                                                                                  | Department of Virus and Microbiological Special Diagnostics, Statens Serum Institut, Denmark                                           | Albertsen lab, Department of Chemistry and Bioscience, Aalborg University, Denmark                                                     | Danish Covid-19 Genome Consortia                                                                                                                                                                                                                                                                                                                                                                                                                                                                         |
| EPI_ISL_416142                                                                                                                                                                                                                                                                                                                                                                                                                                                                                                                                                                                                                                                                                                                                                                                                                                                                                                                                                                                                                                                                                                                                                                                                                                                                                                                                                                                                                                                                                                                                                                                                                                                                                                                                                                                                                                                                                                                                                                                                                                                                                                                                                                                                                                                                                                                                                                                                                                                                                                                                                                                                                                                                                                                                                                                                                                                                                                                                                                                                                                                                                                                                                                                                                                                                                                                                                                                                                                                                                                                                                                                                                                                                                                                                                                                                                                                                                                                                                                                                                                                                                                                                                                                                                                                                                                                                                                                                                                                                                                                                                                                                                                                                                                                                                                                                                                                                                                                                                                                                                                                                                                                                                                                                                                                                                                                                                                                                                                                                                                                                                                                                                                                                                                                                                                                                                                                                                                                                                                                                                                                                                                                                                                                                                                                                                                                                                                                                                                                                                                                                                                                                                                                                                                                                                                                                                                                                                                                                                                                                                                                                                                                                                                                                                                                                                                                                                                                                                                                                                                                                                                                                                                                                                                                                                                                                                                                                                                                                                                                                                                                                                                                                                                                                                                                                                                                                                                                                                                                                                                                                                                                                                                                                                                                                                                                                                                                                                                                                                                                                                                                                                                                                                                                                                                                                                                                                                                                                                                                                                                                                                                                                                                                                                                                                                                                                                                                                                                                                                                                                                                                                                                                                                                                                                                                                                                                                                                                                                                                                                                                                                                                                                                                                                                                                                                                                                                                                                                                                                                                                                                                                                                                                                                                                                                                                                                                                                                                                                                                                                                                                                                                                                                                                                                                                  | Department of Virus and Microbiological Special diagnostics, Statens Serum Institut, Copenhagen, Denmark.                              | Statens Serum Institute                                                                                                                | Anders Fornsgaard; Maiken Worsoe Rosenstjerne; Morten Rasmussen                                                                                                                                                                                                                                                                                                                                                                                                                                          |
| EPI_ISL_416143                                                                                                                                                                                                                                                                                                                                                                                                                                                                                                                                                                                                                                                                                                                                                                                                                                                                                                                                                                                                                                                                                                                                                                                                                                                                                                                                                                                                                                                                                                                                                                                                                                                                                                                                                                                                                                                                                                                                                                                                                                                                                                                                                                                                                                                                                                                                                                                                                                                                                                                                                                                                                                                                                                                                                                                                                                                                                                                                                                                                                                                                                                                                                                                                                                                                                                                                                                                                                                                                                                                                                                                                                                                                                                                                                                                                                                                                                                                                                                                                                                                                                                                                                                                                                                                                                                                                                                                                                                                                                                                                                                                                                                                                                                                                                                                                                                                                                                                                                                                                                                                                                                                                                                                                                                                                                                                                                                                                                                                                                                                                                                                                                                                                                                                                                                                                                                                                                                                                                                                                                                                                                                                                                                                                                                                                                                                                                                                                                                                                                                                                                                                                                                                                                                                                                                                                                                                                                                                                                                                                                                                                                                                                                                                                                                                                                                                                                                                                                                                                                                                                                                                                                                                                                                                                                                                                                                                                                                                                                                                                                                                                                                                                                                                                                                                                                                                                                                                                                                                                                                                                                                                                                                                                                                                                                                                                                                                                                                                                                                                                                                                                                                                                                                                                                                                                                                                                                                                                                                                                                                                                                                                                                                                                                                                                                                                                                                                                                                                                                                                                                                                                                                                                                                                                                                                                                                                                                                                                                                                                                                                                                                                                                                                                                                                                                                                                                                                                                                                                                                                                                                                                                                                                                                                                                                                                                                                                                                                                                                                                                                                                                                                                                                                                                                                                  | Department of Virus and Microbiological Special diagnostics, Statens Serum Institut, Copenhagen, Denmark.                              | ViFU                                                                                                                                   | Anders Fornsgaard; Maiken Worsoe Rosenstjerne; Morten Rasmussen                                                                                                                                                                                                                                                                                                                                                                                                                                          |
| EPI_ISL_708081                                                                                                                                                                                                                                                                                                                                                                                                                                                                                                                                                                                                                                                                                                                                                                                                                                                                                                                                                                                                                                                                                                                                                                                                                                                                                                                                                                                                                                                                                                                                                                                                                                                                                                                                                                                                                                                                                                                                                                                                                                                                                                                                                                                                                                                                                                                                                                                                                                                                                                                                                                                                                                                                                                                                                                                                                                                                                                                                                                                                                                                                                                                                                                                                                                                                                                                                                                                                                                                                                                                                                                                                                                                                                                                                                                                                                                                                                                                                                                                                                                                                                                                                                                                                                                                                                                                                                                                                                                                                                                                                                                                                                                                                                                                                                                                                                                                                                                                                                                                                                                                                                                                                                                                                                                                                                                                                                                                                                                                                                                                                                                                                                                                                                                                                                                                                                                                                                                                                                                                                                                                                                                                                                                                                                                                                                                                                                                                                                                                                                                                                                                                                                                                                                                                                                                                                                                                                                                                                                                                                                                                                                                                                                                                                                                                                                                                                                                                                                                                                                                                                                                                                                                                                                                                                                                                                                                                                                                                                                                                                                                                                                                                                                                                                                                                                                                                                                                                                                                                                                                                                                                                                                                                                                                                                                                                                                                                                                                                                                                                                                                                                                                                                                                                                                                                                                                                                                                                                                                                                                                                                                                                                                                                                                                                                                                                                                                                                                                                                                                                                                                                                                                                                                                                                                                                                                                                                                                                                                                                                                                                                                                                                                                                                                                                                                                                                                                                                                                                                                                                                                                                                                                                                                                                                                                                                                                                                                                                                                                                                                                                                                                                                                                                                                                                                  | Dept. of Medical Microbiology, Stavanger University Hospital, Helse Stavanger HF                                                       | Norwegian Institute of Public Health, Department of Virology                                                                           | Hilde Elshaug; Hilde Vollan; Kamilla Heddeland Instefjord; Karoline Bragstad; Kathrine Stene-Johansen; Marie Paulsen Madsen; Olav Hungnes; Rasmus Riis Kopperud                                                                                                                                                                                                                                                                                                                                          |
| EPI_ISL_666568, EPI_ISL_1118112                                                                                                                                                                                                                                                                                                                                                                                                                                                                                                                                                                                                                                                                                                                                                                                                                                                                                                                                                                                                                                                                                                                                                                                                                                                                                                                                                                                                                                                                                                                                                                                                                                                                                                                                                                                                                                                                                                                                                                                                                                                                                                                                                                                                                                                                                                                                                                                                                                                                                                                                                                                                                                                                                                                                                                                                                                                                                                                                                                                                                                                                                                                                                                                                                                                                                                                                                                                                                                                                                                                                                                                                                                                                                                                                                                                                                                                                                                                                                                                                                                                                                                                                                                                                                                                                                                                                                                                                                                                                                                                                                                                                                                                                                                                                                                                                                                                                                                                                                                                                                                                                                                                                                                                                                                                                                                                                                                                                                                                                                                                                                                                                                                                                                                                                                                                                                                                                                                                                                                                                                                                                                                                                                                                                                                                                                                                                                                                                                                                                                                                                                                                                                                                                                                                                                                                                                                                                                                                                                                                                                                                                                                                                                                                                                                                                                                                                                                                                                                                                                                                                                                                                                                                                                                                                                                                                                                                                                                                                                                                                                                                                                                                                                                                                                                                                                                                                                                                                                                                                                                                                                                                                                                                                                                                                                                                                                                                                                                                                                                                                                                                                                                                                                                                                                                                                                                                                                                                                                                                                                                                                                                                                                                                                                                                                                                                                                                                                                                                                                                                                                                                                                                                                                                                                                                                                                                                                                                                                                                                                                                                                                                                                                                                                                                                                                                                                                                                                                                                                                                                                                                                                                                                                                                                                                                                                                                                                                                                                                                                                                                                                                                                                                                                                                                                 | Dept. of Microbiology and Infection Control, Akershus University Hospital HF                                                           | Dept. of Microbiology and Infection Control, Akershus University Hospital HF                                                           | Alexander Hesselberg Lovestad; Hege Vangstein Aamot; Nina Handal; Ole Herman Ambur; Silje Bakken Jørgensen                                                                                                                                                                                                                                                                                                                                                                                               |
| EPI_ISL_410532                                                                                                                                                                                                                                                                                                                                                                                                                                                                                                                                                                                                                                                                                                                                                                                                                                                                                                                                                                                                                                                                                                                                                                                                                                                                                                                                                                                                                                                                                                                                                                                                                                                                                                                                                                                                                                                                                                                                                                                                                                                                                                                                                                                                                                                                                                                                                                                                                                                                                                                                                                                                                                                                                                                                                                                                                                                                                                                                                                                                                                                                                                                                                                                                                                                                                                                                                                                                                                                                                                                                                                                                                                                                                                                                                                                                                                                                                                                                                                                                                                                                                                                                                                                                                                                                                                                                                                                                                                                                                                                                                                                                                                                                                                                                                                                                                                                                                                                                                                                                                                                                                                                                                                                                                                                                                                                                                                                                                                                                                                                                                                                                                                                                                                                                                                                                                                                                                                                                                                                                                                                                                                                                                                                                                                                                                                                                                                                                                                                                                                                                                                                                                                                                                                                                                                                                                                                                                                                                                                                                                                                                                                                                                                                                                                                                                                                                                                                                                                                                                                                                                                                                                                                                                                                                                                                                                                                                                                                                                                                                                                                                                                                                                                                                                                                                                                                                                                                                                                                                                                                                                                                                                                                                                                                                                                                                                                                                                                                                                                                                                                                                                                                                                                                                                                                                                                                                                                                                                                                                                                                                                                                                                                                                                                                                                                                                                                                                                                                                                                                                                                                                                                                                                                                                                                                                                                                                                                                                                                                                                                                                                                                                                                                                                                                                                                                                                                                                                                                                                                                                                                                                                                                                                                                                                                                                                                                                                                                                                                                                                                                                                                                                                                                                                                                                  | Dept. of Pathology, National Institute of Infectious Diseases                                                                          | Pathogen Genomics Center, National Institute of Infectious Diseases                                                                    | Harutaka Katano; Hideki Hasegawa; Kazuya Shirato; Makoto Kuroda; Makoto Takeda; Motoi Suzuki; Naganori Nao; Shutoku Matsuyama; Tadaki Suzuki; Takaji Wakita; Tsuyoshi Sekizuka                                                                                                                                                                                                                                                                                                                           |
| EPI_ISL_774897, EPI_ISL_774915                                                                                                                                                                                                                                                                                                                                                                                                                                                                                                                                                                                                                                                                                                                                                                                                                                                                                                                                                                                                                                                                                                                                                                                                                                                                                                                                                                                                                                                                                                                                                                                                                                                                                                                                                                                                                                                                                                                                                                                                                                                                                                                                                                                                                                                                                                                                                                                                                                                                                                                                                                                                                                                                                                                                                                                                                                                                                                                                                                                                                                                                                                                                                                                                                                                                                                                                                                                                                                                                                                                                                                                                                                                                                                                                                                                                                                                                                                                                                                                                                                                                                                                                                                                                                                                                                                                                                                                                                                                                                                                                                                                                                                                                                                                                                                                                                                                                                                                                                                                                                                                                                                                                                                                                                                                                                                                                                                                                                                                                                                                                                                                                                                                                                                                                                                                                                                                                                                                                                                                                                                                                                                                                                                                                                                                                                                                                                                                                                                                                                                                                                                                                                                                                                                                                                                                                                                                                                                                                                                                                                                                                                                                                                                                                                                                                                                                                                                                                                                                                                                                                                                                                                                                                                                                                                                                                                                                                                                                                                                                                                                                                                                                                                                                                                                                                                                                                                                                                                                                                                                                                                                                                                                                                                                                                                                                                                                                                                                                                                                                                                                                                                                                                                                                                                                                                                                                                                                                                                                                                                                                                                                                                                                                                                                                                                                                                                                                                                                                                                                                                                                                                                                                                                                                                                                                                                                                                                                                                                                                                                                                                                                                                                                                                                                                                                                                                                                                                                                                                                                                                                                                                                                                                                                                                                                                                                                                                                                                                                                                                                                                                                                                                                                                                                                                  | Designated Reference Institute for Chemical Measurements (DRICM)                                                                       | DNA SOLUTION LTD.                                                                                                                      | Abdul Khaleque; Abu Sufian; Hasan Ul Haider; Jannatun Naima; Kazi Nadim Hasan; MSM Chowdhury; Mala Khan; Mamudul Hasan Razu; Md. Imran Khan; Mizanur Rahman; Mohammad Fazle Alam Rabbi                                                                                                                                                                                                                                                                                                                   |
| EPI_ISL_807155                                                                                                                                                                                                                                                                                                                                                                                                                                                                                                                                                                                                                                                                                                                                                                                                                                                                                                                                                                                                                                                                                                                                                                                                                                                                                                                                                                                                                                                                                                                                                                                                                                                                                                                                                                                                                                                                                                                                                                                                                                                                                                                                                                                                                                                                                                                                                                                                                                                                                                                                                                                                                                                                                                                                                                                                                                                                                                                                                                                                                                                                                                                                                                                                                                                                                                                                                                                                                                                                                                                                                                                                                                                                                                                                                                                                                                                                                                                                                                                                                                                                                                                                                                                                                                                                                                                                                                                                                                                                                                                                                                                                                                                                                                                                                                                                                                                                                                                                                                                                                                                                                                                                                                                                                                                                                                                                                                                                                                                                                                                                                                                                                                                                                                                                                                                                                                                                                                                                                                                                                                                                                                                                                                                                                                                                                                                                                                                                                                                                                                                                                                                                                                                                                                                                                                                                                                                                                                                                                                                                                                                                                                                                                                                                                                                                                                                                                                                                                                                                                                                                                                                                                                                                                                                                                                                                                                                                                                                                                                                                                                                                                                                                                                                                                                                                                                                                                                                                                                                                                                                                                                                                                                                                                                                                                                                                                                                                                                                                                                                                                                                                                                                                                                                                                                                                                                                                                                                                                                                                                                                                                                                                                                                                                                                                                                                                                                                                                                                                                                                                                                                                                                                                                                                                                                                                                                                                                                                                                                                                                                                                                                                                                                                                                                                                                                                                                                                                                                                                                                                                                                                                                                                                                                                                                                                                                                                                                                                                                                                                                                                                                                                                                                                                                                                                  | Deva County Emergency Hospital                                                                                                         | National Institute of Infectious Diseases-Prof. Dr. Matei Bals Molecular Diagnostics Laboratory                                        | Andreea Tudor; Corina Casangiu; Dan Otelea; Leontina Banica; Marius Surleac; Petre Milu; Simona Paraschiv                                                                                                                                                                                                                                                                                                                                                                                                |
| EPI_ISL_1086039, EPI_ISL_1086041, EPI_ISL_1086042                                                                                                                                                                                                                                                                                                                                                                                                                                                                                                                                                                                                                                                                                                                                                                                                                                                                                                                                                                                                                                                                                                                                                                                                                                                                                                                                                                                                                                                                                                                                                                                                                                                                                                                                                                                                                                                                                                                                                                                                                                                                                                                                                                                                                                                                                                                                                                                                                                                                                                                                                                                                                                                                                                                                                                                                                                                                                                                                                                                                                                                                                                                                                                                                                                                                                                                                                                                                                                                                                                                                                                                                                                                                                                                                                                                                                                                                                                                                                                                                                                                                                                                                                                                                                                                                                                                                                                                                                                                                                                                                                                                                                                                                                                                                                                                                                                                                                                                                                                                                                                                                                                                                                                                                                                                                                                                                                                                                                                                                                                                                                                                                                                                                                                                                                                                                                                                                                                                                                                                                                                                                                                                                                                                                                                                                                                                                                                                                                                                                                                                                                                                                                                                                                                                                                                                                                                                                                                                                                                                                                                                                                                                                                                                                                                                                                                                                                                                                                                                                                                                                                                                                                                                                                                                                                                                                                                                                                                                                                                                                                                                                                                                                                                                                                                                                                                                                                                                                                                                                                                                                                                                                                                                                                                                                                                                                                                                                                                                                                                                                                                                                                                                                                                                                                                                                                                                                                                                                                                                                                                                                                                                                                                                                                                                                                                                                                                                                                                                                                                                                                                                                                                                                                                                                                                                                                                                                                                                                                                                                                                                                                                                                                                                                                                                                                                                                                                                                                                                                                                                                                                                                                                                                                                                                                                                                                                                                                                                                                                                                                                                                                                                                                                                                                               | Diagnosticos da America - DASA                                                                                                         | Instituto Adolfo Lutz, Interdisciplinary Procedures Center, Strategic Laboratory                                                       | Caio Vinicius Dias Lopes; Claudia Regina Gonçalves; Claudio Tavares Sacchi; Erica Valessa Ramos Gomes; Karoline Rodrigues Campos                                                                                                                                                                                                                                                                                                                                                                         |
| EPI_ISL_845621, EPI_ISL_845623                                                                                                                                                                                                                                                                                                                                                                                                                                                                                                                                                                                                                                                                                                                                                                                                                                                                                                                                                                                                                                                                                                                                                                                                                                                                                                                                                                                                                                                                                                                                                                                                                                                                                                                                                                                                                                                                                                                                                                                                                                                                                                                                                                                                                                                                                                                                                                                                                                                                                                                                                                                                                                                                                                                                                                                                                                                                                                                                                                                                                                                                                                                                                                                                                                                                                                                                                                                                                                                                                                                                                                                                                                                                                                                                                                                                                                                                                                                                                                                                                                                                                                                                                                                                                                                                                                                                                                                                                                                                                                                                                                                                                                                                                                                                                                                                                                                                                                                                                                                                                                                                                                                                                                                                                                                                                                                                                                                                                                                                                                                                                                                                                                                                                                                                                                                                                                                                                                                                                                                                                                                                                                                                                                                                                                                                                                                                                                                                                                                                                                                                                                                                                                                                                                                                                                                                                                                                                                                                                                                                                                                                                                                                                                                                                                                                                                                                                                                                                                                                                                                                                                                                                                                                                                                                                                                                                                                                                                                                                                                                                                                                                                                                                                                                                                                                                                                                                                                                                                                                                                                                                                                                                                                                                                                                                                                                                                                                                                                                                                                                                                                                                                                                                                                                                                                                                                                                                                                                                                                                                                                                                                                                                                                                                                                                                                                                                                                                                                                                                                                                                                                                                                                                                                                                                                                                                                                                                                                                                                                                                                                                                                                                                                                                                                                                                                                                                                                                                                                                                                                                                                                                                                                                                                                                                                                                                                                                                                                                                                                                                                                                                                                                                                                                                                                  | Dirección de Sanidad Ejército                                                                                                          | Instituto Nacional de Salud - Dirección de Investigación en Salud Pública                                                              | Carlos Franco-Muñoz; Diego A. Álvarez-Díaz; Diego Andrés Prada; Gerardo Santamaría; Jonathan Reales; Julian Naizaque; Katherine Laiton-Donato; Magdalena Wiesner; Marcela Mercado-Reyes; María T. Herrera-Sepúlveda; Martha Lucia Ospina Martínez; Mauricio Pacheco-Montealegre; Paola Muñoz-Laiton; Sheryll Corchuelo                                                                                                                                                                                   |
| EPI_ISL_747402, EPI_ISL_747405, EPI_ISL_760096, EPI_ISL_760122, EPI_ISL_760154, EPI_ISL_760160, EPI_ISL_760175, EPI_ISL_760178, EPI_ISL_760180, EPI_ISL_760199, EPI_ISL_760200, EPI_ISL_760207, EPI_ISL_760217, EPI_ISL_850203, EPI_ISL_955964, EPI_ISL_959508, EPI_ISL_959524, EPI_ISL_994674, EPI_ISL_994762, EPI_ISL_994787, EPI_ISL_995225, EPI_ISL_995326, EPI_ISL_995767, EPI_ISL_995773, EPI_ISL_995797, EPI_ISL_1007643, EPI_ISL_1007654, EPI_ISL_1063622, EPI_ISL_1063700, EPI_ISL_1063711, EPI_ISL_1063712, EPI_ISL_1063733, EPI_ISL_1063766, EPI_ISL_1063772                                                                                                                                                                                                                                                                                                                                                                                                                                                                                                                                                                                                                                                                                                                                                                                                                                                                                                                                                                                                                                                                                                                                                                                                                                                                                                                                                                                                                                                                                                                                                                                                                                                                                                                                                                                                                                                                                                                                                                                                                                                                                                                                                                                                                                                                                                                                                                                                                                                                                                                                                                                                                                                                                                                                                                                                                                                                                                                                                                                                                                                                                                                                                                                                                                                                                                                                                                                                                                                                                                                                                                                                                                                                                                                                                                                                                                                                                                                                                                                                                                                                                                                                                                                                                                                                                                                                                                                                                                                                                                                                                                                                                                                                                                                                                                                                                                                                                                                                                                                                                                                                                                                                                                                                                                                                                                                                                                                                                                                                                                                                                                                                                                                                                                                                                                                                                                                                                                                                                                                                                                                                                                                                                                                                                                                                                                                                                                                                                                                                                                                                                                                                                                                                                                                                                                                                                                                                                                                                                                                                                                                                                                                                                                                                                                                                                                                                                                                                                                                                                                                                                                                                                                                                                                                                                                                                                                                                                                                                                                                                                                                                                                                                                                                                                                                                                                                                                                                                                                                                                                                                                                                                                                                                                                                                                                                                                                                                                                                                                                                                                                                                                                                                                                                                                                                                                                                                                                                                                                                                                                                                                                                                                                                                                                                                                                                                                                                                                                                                                                                                                                                                                                                                                                                                                                                                                                                                                                                                                                                                                                                                                                                                                                                                                                                                                                                                                                                                                                                                                                                                                                                                                                                                                                         | Division of Emerging Infectious Diseases, Bureau of Infectious Diseases Diagnosis Control, Korea Disease Control and Prevention Agency | Division of Emerging Infectious Diseases, Bureau of Infectious Diseases Diagnosis Control, Korea Disease Control and Prevention Agency | Ae Kyung Park; Chae Young Lee; Chaeyoung Lee; Eun-Jin Kim; Heui Man Kim; Il-Hwan Kim; Jeong-Min Kim; Namjoo Lee; Sang Hee Woo                                                                                                                                                                                                                                                                                                                                                                            |
| see above                                                                                                                                                                                                                                                                                                                                                                                                                                                                                                                                                                                                                                                                                                                                                                                                                                                                                                                                                                                                                                                                                                                                                                                                                                                                                                                                                                                                                                                                                                                                                                                                                                                                                                                                                                                                                                                                                                                                                                                                                                                                                                                                                                                                                                                                                                                                                                                                                                                                                                                                                                                                                                                                                                                                                                                                                                                                                                                                                                                                                                                                                                                                                                                                                                                                                                                                                                                                                                                                                                                                                                                                                                                                                                                                                                                                                                                                                                                                                                                                                                                                                                                                                                                                                                                                                                                                                                                                                                                                                                                                                                                                                                                                                                                                                                                                                                                                                                                                                                                                                                                                                                                                                                                                                                                                                                                                                                                                                                                                                                                                                                                                                                                                                                                                                                                                                                                                                                                                                                                                                                                                                                                                                                                                                                                                                                                                                                                                                                                                                                                                                                                                                                                                                                                                                                                                                                                                                                                                                                                                                                                                                                                                                                                                                                                                                                                                                                                                                                                                                                                                                                                                                                                                                                                                                                                                                                                                                                                                                                                                                                                                                                                                                                                                                                                                                                                                                                                                                                                                                                                                                                                                                                                                                                                                                                                                                                                                                                                                                                                                                                                                                                                                                                                                                                                                                                                                                                                                                                                                                                                                                                                                                                                                                                                                                                                                                                                                                                                                                                                                                                                                                                                                                                                                                                                                                                                                                                                                                                                                                                                                                                                                                                                                                                                                                                                                                                                                                                                                                                                                                                                                                                                                                                                                                                                                                                                                                                                                                                                                                                                                                                                                                                                                                                                                       | Division of Infectious Diseases, University Hospital Zurich                                                                            | Institute of Medical Virology, University of Zurich                                                                                    | Alexandra Trkola; Andrea Zbinden; Fiona Steiner; Gabriela Ziltener; Jon Huder; Jürg Böni; Maryam Zaheri; Michael Huber; Patrick Redli; Riccarda Capaul; Roberto Speck; Stefan Schmutz; Verena Kufner                                                                                                                                                                                                                                                                                                     |
| EPI_ISL_413024                                                                                                                                                                                                                                                                                                                                                                                                                                                                                                                                                                                                                                                                                                                                                                                                                                                                                                                                                                                                                                                                                                                                                                                                                                                                                                                                                                                                                                                                                                                                                                                                                                                                                                                                                                                                                                                                                                                                                                                                                                                                                                                                                                                                                                                                                                                                                                                                                                                                                                                                                                                                                                                                                                                                                                                                                                                                                                                                                                                                                                                                                                                                                                                                                                                                                                                                                                                                                                                                                                                                                                                                                                                                                                                                                                                                                                                                                                                                                                                                                                                                                                                                                                                                                                                                                                                                                                                                                                                                                                                                                                                                                                                                                                                                                                                                                                                                                                                                                                                                                                                                                                                                                                                                                                                                                                                                                                                                                                                                                                                                                                                                                                                                                                                                                                                                                                                                                                                                                                                                                                                                                                                                                                                                                                                                                                                                                                                                                                                                                                                                                                                                                                                                                                                                                                                                                                                                                                                                                                                                                                                                                                                                                                                                                                                                                                                                                                                                                                                                                                                                                                                                                                                                                                                                                                                                                                                                                                                                                                                                                                                                                                                                                                                                                                                                                                                                                                                                                                                                                                                                                                                                                                                                                                                                                                                                                                                                                                                                                                                                                                                                                                                                                                                                                                                                                                                                                                                                                                                                                                                                                                                                                                                                                                                                                                                                                                                                                                                                                                                                                                                                                                                                                                                                                                                                                                                                                                                                                                                                                                                                                                                                                                                                                                                                                                                                                                                                                                                                                                                                                                                                                                                                                                                                                                                                                                                                                                                                                                                                                                                                                                                                                                                                                                                                  | Division of Infectious Diseases, University Hospital Zurich                                                                            | Institute of Medical Virology, University of Zurich                                                                                    | Alexandra Trkola; Andrea Zbinden; Fiona Steiner; Gabriela Ziltener; Jon Huder; Jürg Böni; Maryam Zaheri; Michael Huber; Patrick Redli; Riccarda Capaul; Roberto Speck; Stefan Schmutz; Verena Kufner                                                                                                                                                                                                                                                                                                     |
| EPI_ISL_412869, EPI_ISL_425118, EPI_ISL_471451, EPI_ISL_498007, EPI_ISL_498032, EPI_ISL_506979, EPI_ISL_506993, EPI_ISL_510588, EPI_ISL_510648                                                                                                                                                                                                                                                                                                                                                                                                                                                                                                                                                                                                                                                                                                                                                                                                                                                                                                                                                                                                                                                                                                                                                                                                                                                                                                                                                                                                                                                                                                                                                                                                                                                                                                                                                                                                                                                                                                                                                                                                                                                                                                                                                                                                                                                                                                                                                                                                                                                                                                                                                                                                                                                                                                                                                                                                                                                                                                                                                                                                                                                                                                                                                                                                                                                                                                                                                                                                                                                                                                                                                                                                                                                                                                                                                                                                                                                                                                                                                                                                                                                                                                                                                                                                                                                                                                                                                                                                                                                                                                                                                                                                                                                                                                                                                                                                                                                                                                                                                                                                                                                                                                                                                                                                                                                                                                                                                                                                                                                                                                                                                                                                                                                                                                                                                                                                                                                                                                                                                                                                                                                                                                                                                                                                                                                                                                                                                                                                                                                                                                                                                                                                                                                                                                                                                                                                                                                                                                                                                                                                                                                                                                                                                                                                                                                                                                                                                                                                                                                                                                                                                                                                                                                                                                                                                                                                                                                                                                                                                                                                                                                                                                                                                                                                                                                                                                                                                                                                                                                                                                                                                                                                                                                                                                                                                                                                                                                                                                                                                                                                                                                                                                                                                                                                                                                                                                                                                                                                                                                                                                                                                                                                                                                                                                                                                                                                                                                                                                                                                                                                                                                                                                                                                                                                                                                                                                                                                                                                                                                                                                                                                                                                                                                                                                                                                                                                                                                                                                                                                                                                                                                                                                                                                                                                                                                                                                                                                                                                                                                                                                                                                                                                  | Division of Viral Diseases, Center for Laboratory Control of Infectious Diseases, Korea Centers for Diseases Control and Prevention    | Division of Viral Diseases, Center for Laboratory Control of Infectious Diseases, Korea Centers for Diseases Control and Prevention    | Daesang Lee; Dong Hyun Song; Heui Man Kim; Hye-Jun Jo; Jeong-Min Kim; Jun-Sub Kim; Junhyeong Jang; Mi-Seon Kim; Myung Guk Han; Namjoo Lee; Sang Hee Woo; Sehee Park; Seong Tae Jeong; Yoon-Seok Chung                                                                                                                                                                                                                                                                                                    |
| see above                                                                                                                                                                                                                                                                                                                                                                                                                                                                                                                                                                                                                                                                                                                                                                                                                                                                                                                                                                                                                                                                                                                                                                                                                                                                                                                                                                                                                                                                                                                                                                                                                                                                                                                                                                                                                                                                                                                                                                                                                                                                                                                                                                                                                                                                                                                                                                                                                                                                                                                                                                                                                                                                                                                                                                                                                                                                                                                                                                                                                                                                                                                                                                                                                                                                                                                                                                                                                                                                                                                                                                                                                                                                                                                                                                                                                                                                                                                                                                                                                                                                                                                                                                                                                                                                                                                                                                                                                                                                                                                                                                                                                                                                                                                                                                                                                                                                                                                                                                                                                                                                                                                                                                                                                                                                                                                                                                                                                                                                                                                                                                                                                                                                                                                                                                                                                                                                                                                                                                                                                                                                                                                                                                                                                                                                                                                                                                                                                                                                                                                                                                                                                                                                                                                                                                                                                                                                                                                                                                                                                                                                                                                                                                                                                                                                                                                                                                                                                                                                                                                                                                                                                                                                                                                                                                                                                                                                                                                                                                                                                                                                                                                                                                                                                                                                                                                                                                                                                                                                                                                                                                                                                                                                                                                                                                                                                                                                                                                                                                                                                                                                                                                                                                                                                                                                                                                                                                                                                                                                                                                                                                                                                                                                                                                                                                                                                                                                                                                                                                                                                                                                                                                                                                                                                                                                                                                                                                                                                                                                                                                                                                                                                                                                                                                                                                                                                                                                                                                                                                                                                                                                                                                                                                                                                                                                                                                                                                                                                                                                                                                                                                                                                                                                                                                                       | Dom Zdravija Sarajevo                                                                                                                  | Alea Genetic Center                                                                                                                    | Konjhodzic R.; Pecar D.; Salihefendic L.                                                                                                                                                                                                                                                                                                                                                                                                                                                                 |
| EPI_ISL_722209                                                                                                                                                                                                                                                                                                                                                                                                                                                                                                                                                                                                                                                                                                                                                                                                                                                                                                                                                                                                                                                                                                                                                                                                                                                                                                                                                                                                                                                                                                                                                                                                                                                                                                                                                                                                                                                                                                                                                                                                                                                                                                                                                                                                                                                                                                                                                                                                                                                                                                                                                                                                                                                                                                                                                                                                                                                                                                                                                                                                                                                                                                                                                                                                                                                                                                                                                                                                                                                                                                                                                                                                                                                                                                                                                                                                                                                                                                                                                                                                                                                                                                                                                                                                                                                                                                                                                                                                                                                                                                                                                                                                                                                                                                                                                                                                                                                                                                                                                                                                                                                                                                                                                                                                                                                                                                                                                                                                                                                                                                                                                                                                                                                                                                                                                                                                                                                                                                                                                                                                                                                                                                                                                                                                                                                                                                                                                                                                                                                                                                                                                                                                                                                                                                                                                                                                                                                                                                                                                                                                                                                                                                                                                                                                                                                                                                                                                                                                                                                                                                                                                                                                                                                                                                                                                                                                                                                                                                                                                                                                                                                                                                                                                                                                                                                                                                                                                                                                                                                                                                                                                                                                                                                                                                                                                                                                                                                                                                                                                                                                                                                                                                                                                                                                                                                                                                                                                                                                                                                                                                                                                                                                                                                                                                                                                                                                                                                                                                                                                                                                                                                                                                                                                                                                                                                                                                                                                                                                                                                                                                                                                                                                                                                                                                                                                                                                                                                                                                                                                                                                                                                                                                                                                                                                                                                                                                                                                                                                                                                                                                                                                                                                                                                                                                                                  | Dom Zdravija Sarajevo                                                                                                                  | Alea Genetic Center                                                                                                                    | Konjhodzic R.; Pecar D.; Salihefendic L.                                                                                                                                                                                                                                                                                                                                                                                                                                                                 |
| EPI_ISL_960171                                                                                                                                                                                                                                                                                                                                                                                                                                                                                                                                                                                                                                                                                                                                                                                                                                                                                                                                                                                                                                                                                                                                                                                                                                                                                                                                                                                                                                                                                                                                                                                                                                                                                                                                                                                                                                                                                                                                                                                                                                                                                                                                                                                                                                                                                                                                                                                                                                                                                                                                                                                                                                                                                                                                                                                                                                                                                                                                                                                                                                                                                                                                                                                                                                                                                                                                                                                                                                                                                                                                                                                                                                                                                                                                                                                                                                                                                                                                                                                                                                                                                                                                                                                                                                                                                                                                                                                                                                                                                                                                                                                                                                                                                                                                                                                                                                                                                                                                                                                                                                                                                                                                                                                                                                                                                                                                                                                                                                                                                                                                                                                                                                                                                                                                                                                                                                                                                                                                                                                                                                                                                                                                                                                                                                                                                                                                                                                                                                                                                                                                                                                                                                                                                                                                                                                                                                                                                                                                                                                                                                                                                                                                                                                                                                                                                                                                                                                                                                                                                                                                                                                                                                                                                                                                                                                                                                                                                                                                                                                                                                                                                                                                                                                                                                                                                                                                                                                                                                                                                                                                                                                                                                                                                                                                                                                                                                                                                                                                                                                                                                                                                                                                                                                                                                                                                                                                                                                                                                                                                                                                                                                                                                                                                                                                                                                                                                                                                                                                                                                                                                                                                                                                                                                                                                                                                                                                                                                                                                                                                                                                                                                                                                                                                                                                                                                                                                                                                                                                                                                                                                                                                                                                                                                                                                                                                                                                                                                                                                                                                                                                                                                                                                                                                                                                  | Dr Abdurahman CDC wc DAC                                                                                                               | National Health Laboratory Service/UCT                                                                                                 | Arash Iranzadeh; Bruna Galvao; Carolyn Williamson; Deelan Doolabh; Diana Hardie; Innocent Mudau; Kruger Marais; Lynn Tyers; Marvin Hsiao; Stephen Korsman                                                                                                                                                                                                                                                                                                                                                |
| EPI_ISL_481754                                                                                                                                                                                                                                                                                                                                                                                                                                                                                                                                                                                                                                                                                                                                                                                                                                                                                                                                                                                                                                                                                                                                                                                                                                                                                                                                                                                                                                                                                                                                                                                                                                                                                                                                                                                                                                                                                                                                                                                                                                                                                                                                                                                                                                                                                                                                                                                                                                                                                                                                                                                                                                                                                                                                                                                                                                                                                                                                                                                                                                                                                                                                                                                                                                                                                                                                                                                                                                                                                                                                                                                                                                                                                                                                                                                                                                                                                                                                                                                                                                                                                                                                                                                                                                                                                                                                                                                                                                                                                                                                                                                                                                                                                                                                                                                                                                                                                                                                                                                                                                                                                                                                                                                                                                                                                                                                                                                                                                                                                                                                                                                                                                                                                                                                                                                                                                                                                                                                                                                                                                                                                                                                                                                                                                                                                                                                                                                                                                                                                                                                                                                                                                                                                                                                                                                                                                                                                                                                                                                                                                                                                                                                                                                                                                                                                                                                                                                                                                                                                                                                                                                                                                                                                                                                                                                                                                                                                                                                                                                                                                                                                                                                                                                                                                                                                                                                                                                                                                                                                                                                                                                                                                                                                                                                                                                                                                                                                                                                                                                                                                                                                                                                                                                                                                                                                                                                                                                                                                                                                                                                                                                                                                                                                                                                                                                                                                                                                                                                                                                                                                                                                                                                                                                                                                                                                                                                                                                                                                                                                                                                                                                                                                                                                                                                                                                                                                                                                                                                                                                                                                                                                                                                                                                                                                                                                                                                                                                                                                                                                                                                                                                                                                                                                                                                  | Dr. Georges-L.-Dumont University Hospital Centre                                                                                       | National Microbiology Laboratory                                                                                                       | Anna Majer; Elsie Grudeski; Gary Van Domselaar; Grace Seo; Guillaume Desnoyers; Jennifer Tanner; Kristyn Burak; Morag Graham; Natalie Knox; Nathalie Bastien; Philip Mabon; Rhiannon Huzarewicz; Richard Garceau; Russell Mandes; Shari Tyson; Timothy Booth; Yan Li                                                                                                                                                                                                                                     |
| EPI_ISL_906775, EPI_ISL_1055395, EPI_ISL_1055400, EPI_ISL_1055402, EPI_ISL_1055409, EPI_ISL_1055415, EPI_ISL_1055422, EPI_ISL_1055433, EPI_ISL_1055450, EPI_ISL_1055451                                                                                                                                                                                                                                                                                                                                                                                                                                                                                                                                                                                                                                                                                                                                                                                                                                                                                                                                                                                                                                                                                                                                                                                                                                                                                                                                                                                                                                                                                                                                                                                                                                                                                                                                                                                                                                                                                                                                                                                                                                                                                                                                                                                                                                                                                                                                                                                                                                                                                                                                                                                                                                                                                                                                                                                                                                                                                                                                                                                                                                                                                                                                                                                                                                                                                                                                                                                                                                                                                                                                                                                                                                                                                                                                                                                                                                                                                                                                                                                                                                                                                                                                                                                                                                                                                                                                                                                                                                                                                                                                                                                                                                                                                                                                                                                                                                                                                                                                                                                                                                                                                                                                                                                                                                                                                                                                                                                                                                                                                                                                                                                                                                                                                                                                                                                                                                                                                                                                                                                                                                                                                                                                                                                                                                                                                                                                                                                                                                                                                                                                                                                                                                                                                                                                                                                                                                                                                                                                                                                                                                                                                                                                                                                                                                                                                                                                                                                                                                                                                                                                                                                                                                                                                                                                                                                                                                                                                                                                                                                                                                                                                                                                                                                                                                                                                                                                                                                                                                                                                                                                                                                                                                                                                                                                                                                                                                                                                                                                                                                                                                                                                                                                                                                                                                                                                                                                                                                                                                                                                                                                                                                                                                                                                                                                                                                                                                                                                                                                                                                                                                                                                                                                                                                                                                                                                                                                                                                                                                                                                                                                                                                                                                                                                                                                                                                                                                                                                                                                                                                                                                                                                                                                                                                                                                                                                                                                                                                                                                                                                                                                                                         | Dr. Leonard A. Miller Centre for Health Services                                                                                       | National Microbiology Laboratory (NML)                                                                                                 | Adel Malek; Anna Majer; Anneliese Landgraff; CanCOGeN's metadata curation team; Darian Hole; Elsie Grudeski; Gary Van Domselaar; George Zahariadis; Grace Seo; Jennifer Tanner; Kerri Smith; Kirsten Biggar; Laura Gilbert; Madison Chapel; Morag Graham; Natalie Knox; Nathalie Bastien; Philip Mabon; Public Health Agency of Canada CanCOGeN team; Rhiannon Huzarewicz; Robert Needle; Russell Mandes; Shari Tyson; Timothy Booth; Yan Li; Yang Yu                                                    |
| see above                                                                                                                                                                                                                                                                                                                                                                                                                                                                                                                                                                                                                                                                                                                                                                                                                                                                                                                                                                                                                                                                                                                                                                                                                                                                                                                                                                                                                                                                                                                                                                                                                                                                                                                                                                                                                                                                                                                                                                                                                                                                                                                                                                                                                                                                                                                                                                                                                                                                                                                                                                                                                                                                                                                                                                                                                                                                                                                                                                                                                                                                                                                                                                                                                                                                                                                                                                                                                                                                                                                                                                                                                                                                                                                                                                                                                                                                                                                                                                                                                                                                                                                                                                                                                                                                                                                                                                                                                                                                                                                                                                                                                                                                                                                                                                                                                                                                                                                                                                                                                                                                                                                                                                                                                                                                                                                                                                                                                                                                                                                                                                                                                                                                                                                                                                                                                                                                                                                                                                                                                                                                                                                                                                                                                                                                                                                                                                                                                                                                                                                                                                                                                                                                                                                                                                                                                                                                                                                                                                                                                                                                                                                                                                                                                                                                                                                                                                                                                                                                                                                                                                                                                                                                                                                                                                                                                                                                                                                                                                                                                                                                                                                                                                                                                                                                                                                                                                                                                                                                                                                                                                                                                                                                                                                                                                                                                                                                                                                                                                                                                                                                                                                                                                                                                                                                                                                                                                                                                                                                                                                                                                                                                                                                                                                                                                                                                                                                                                                                                                                                                                                                                                                                                                                                                                                                                                                                                                                                                                                                                                                                                                                                                                                                                                                                                                                                                                                                                                                                                                                                                                                                                                                                                                                                                                                                                                                                                                                                                                                                                                                                                                                                                                                                                                                                       | Dr. Leonard A. Miller Centre for Health Services                                                                                       | National Microbiology Laboratory (NML)                                                                                                 | Adel Malek; Anna Majer; Anneliese Landgraff; CanCOGeN's metadata curation team; Darian Hole; Elsie Grudeski; Gary Van Domselaar; George Zahariadis; Grace Seo; Jennifer Tanner; Kerri Smith; Kirsten Biggar; Laura Gilbert; Madison Chapel; Morag Graham; Natalie Knox; Nathalie Bastien; Philip Mabon; Public Health Agency of Canada CanCOGeN team; Rhiannon Huzarewicz; Robert Needle; Russell Mandes; Shari Tyson; Timothy Booth; Yan Li; Yang Yu                                                    |
| EPI_ISL_417211, EPI_ISL_417212                                                                                                                                                                                                                                                                                                                                                                                                                                                                                                                                                                                                                                                                                                                                                                                                                                                                                                                                                                                                                                                                                                                                                                                                                                                                                                                                                                                                                                                                                                                                                                                                                                                                                                                                                                                                                                                                                                                                                                                                                                                                                                                                                                                                                                                                                                                                                                                                                                                                                                                                                                                                                                                                                                                                                                                                                                                                                                                                                                                                                                                                                                                                                                                                                                                                                                                                                                                                                                                                                                                                                                                                                                                                                                                                                                                                                                                                                                                                                                                                                                                                                                                                                                                                                                                                                                                                                                                                                                                                                                                                                                                                                                                                                                                                                                                                                                                                                                                                                                                                                                                                                                                                                                                                                                                                                                                                                                                                                                                                                                                                                                                                                                                                                                                                                                                                                                                                                                                                                                                                                                                                                                                                                                                                                                                                                                                                                                                                                                                                                                                                                                                                                                                                                                                                                                                                                                                                                                                                                                                                                                                                                                                                                                                                                                                                                                                                                                                                                                                                                                                                                                                                                                                                                                                                                                                                                                                                                                                                                                                                                                                                                                                                                                                                                                                                                                                                                                                                                                                                                                                                                                                                                                                                                                                                                                                                                                                                                                                                                                                                                                                                                                                                                                                                                                                                                                                                                                                                                                                                                                                                                                                                                                                                                                                                                                                                                                                                                                                                                                                                                                                                                                                                                                                                                                                                                                                                                                                                                                                                                                                                                                                                                                                                                                                                                                                                                                                                                                                                                                                                                                                                                                                                                                                                                                                                                                                                                                                                                                                                                                                                                                                                                                                                                                                  | Dunedin Hospital                                                                                                                       | University of Otago                                                                                                                    | B. Lawley; J. Grant; J. Ussher; M.E. Quiñones-Mateu; R. Harfoot                                                                                                                                                                                                                                                                                                                                                                                                                                          |
| EPI_ISL_523737, EPI_ISL_632766, EPI_ISL_722577, EPI_ISL_722753, EPI_ISL_763136, EPI_ISL_904271, EPI_ISL_904458, EPI_ISL_904532                                                                                                                                                                                                                                                                                                                                                                                                                                                                                                                                                                                                                                                                                                                                                                                                                                                                                                                                                                                                                                                                                                                                                                                                                                                                                                                                                                                                                                                                                                                                                                                                                                                                                                                                                                                                                                                                                                                                                                                                                                                                                                                                                                                                                                                                                                                                                                                                                                                                                                                                                                                                                                                                                                                                                                                                                                                                                                                                                                                                                                                                                                                                                                                                                                                                                                                                                                                                                                                                                                                                                                                                                                                                                                                                                                                                                                                                                                                                                                                                                                                                                                                                                                                                                                                                                                                                                                                                                                                                                                                                                                                                                                                                                                                                                                                                                                                                                                                                                                                                                                                                                                                                                                                                                                                                                                                                                                                                                                                                                                                                                                                                                                                                                                                                                                                                                                                                                                                                                                                                                                                                                                                                                                                                                                                                                                                                                                                                                                                                                                                                                                                                                                                                                                                                                                                                                                                                                                                                                                                                                                                                                                                                                                                                                                                                                                                                                                                                                                                                                                                                                                                                                                                                                                                                                                                                                                                                                                                                                                                                                                                                                                                                                                                                                                                                                                                                                                                                                                                                                                                                                                                                                                                                                                                                                                                                                                                                                                                                                                                                                                                                                                                                                                                                                                                                                                                                                                                                                                                                                                                                                                                                                                                                                                                                                                                                                                                                                                                                                                                                                                                                                                                                                                                                                                                                                                                                                                                                                                                                                                                                                                                                                                                                                                                                                                                                                                                                                                                                                                                                                                                                                                                                                                                                                                                                                                                                                                                                                                                                                                                                                                                                                  | Dutch COVID-19 response team                                                                                                           | Erasmus Medical Center                                                                                                                 | Anne van der Linden; Anneliek van der Eijk; Aura Timen; Bas Oude Munnink; Claudia Schapendonk; Corien Swaan; Corine GeurtsvanKessel; David Nieuwenhuijse; Emmanuelle Munger; Irina Chestakova; Jeroen van Kampen; Jolanda Voermans; Madelief Mollers; Manon Haverkate; Marion Koopmans; Marjan Boter; Mark Pronk; Mart Stein; Pascal Lexmond; Reina Sikkema; Richard Molenkamp; Sandra Kengne Kanga Mbou; Stefan van Nieuwkoop; Theo Bestebroer; on behalf of the Dutch national COVID-19 response team. |
| see above                                                                                                                                                                                                                                                                                                                                                                                                                                                                                                                                                                                                                                                                                                                                                                                                                                                                                                                                                                                                                                                                                                                                                                                                                                                                                                                                                                                                                                                                                                                                                                                                                                                                                                                                                                                                                                                                                                                                                                                                                                                                                                                                                                                                                                                                                                                                                                                                                                                                                                                                                                                                                                                                                                                                                                                                                                                                                                                                                                                                                                                                                                                                                                                                                                                                                                                                                                                                                                                                                                                                                                                                                                                                                                                                                                                                                                                                                                                                                                                                                                                                                                                                                                                                                                                                                                                                                                                                                                                                                                                                                                                                                                                                                                                                                                                                                                                                                                                                                                                                                                                                                                                                                                                                                                                                                                                                                                                                                                                                                                                                                                                                                                                                                                                                                                                                                                                                                                                                                                                                                                                                                                                                                                                                                                                                                                                                                                                                                                                                                                                                                                                                                                                                                                                                                                                                                                                                                                                                                                                                                                                                                                                                                                                                                                                                                                                                                                                                                                                                                                                                                                                                                                                                                                                                                                                                                                                                                                                                                                                                                                                                                                                                                                                                                                                                                                                                                                                                                                                                                                                                                                                                                                                                                                                                                                                                                                                                                                                                                                                                                                                                                                                                                                                                                                                                                                                                                                                                                                                                                                                                                                                                                                                                                                                                                                                                                                                                                                                                                                                                                                                                                                                                                                                                                                                                                                                                                                                                                                                                                                                                                                                                                                                                                                                                                                                                                                                                                                                                                                                                                                                                                                                                                                                                                                                                                                                                                                                                                                                                                                                                                                                                                                                                                                                                       | Dutch COVID-19 response team                                                                                                           | Erasmus Medical Center                                                                                                                 | Anne van der Linden; Anneliek van der Eijk; Aura Timen; Bas Oude Munnink; Claudia Schapendonk; Corien Swaan; Corine GeurtsvanKessel; David Nieuwenhuijse; Emmanuelle Munger; Irina Chestakova; Jeroen van Kampen; Jolanda Voermans; Madelief Mollers; Manon Haverkate; Marion Koopmans; Marjan Boter; Mark Pronk; Mart Stein; Pascal Lexmond; Reina Sikkema; Richard Molenkamp; Sandra Kengne Kanga Mbou; Stefan van Nieuwkoop; Theo Bestebroer; on behalf of the Dutch national COVID-19 response team. |
| EPI_ISL_1120310, EPI_ISL_1120397                                                                                                                                                                                                                                                                                                                                                                                                                                                                                                                                                                                                                                                                                                                                                                                                                                                                                                                                                                                                                                                                                                                                                                                                                                                                                                                                                                                                                                                                                                                                                                                                                                                                                                                                                                                                                                                                                                                                                                                                                                                                                                                                                                                                                                                                                                                                                                                                                                                                                                                                                                                                                                                                                                                                                                                                                                                                                                                                                                                                                                                                                                                                                                                                                                                                                                                                                                                                                                                                                                                                                                                                                                                                                                                                                                                                                                                                                                                                                                                                                                                                                                                                                                                                                                                                                                                                                                                                                                                                                                                                                                                                                                                                                                                                                                                                                                                                                                                                                                                                                                                                                                                                                                                                                                                                                                                                                                                                                                                                                                                                                                                                                                                                                                                                                                                                                                                                                                                                                                                                                                                                                                                                                                                                                                                                                                                                                                                                                                                                                                                                                                                                                                                                                                                                                                                                                                                                                                                                                                                                                                                                                                                                                                                                                                                                                                                                                                                                                                                                                                                                                                                                                                                                                                                                                                                                                                                                                                                                                                                                                                                                                                                                                                                                                                                                                                                                                                                                                                                                                                                                                                                                                                                                                                                                                                                                                                                                                                                                                                                                                                                                                                                                                                                                                                                                                                                                                                                                                                                                                                                                                                                                                                                                                                                                                                                                                                                                                                                                                                                                                                                                                                                                                                                                                                                                                                                                                                                                                                                                                                                                                                                                                                                                                                                                                                                                                                                                                                                                                                                                                                                                                                                                                                                                                                                                                                                                                                                                                                                                                                                                                                                                                                                                                                                | Dutch COVID-19 response team                                                                                                           | Medical Microbiology, Maastricht University Medical Centre                                                                             | Brian van der Veer*; Carmen Reumkens; Christian Hoeb; Erik Beuken; Jozef Dingemans*; Lieke van Alphen; Paul Savelkoul                                                                                                                                                                                                                                                                                                                                                                                    |
| EPI_ISL_454751, EPI_ISL_547447, EPI_ISL_547448, EPI_ISL_636514, EPI_ISL_636518, EPI_ISL_636519, EPI_ISL_636520, EPI_ISL_636521, EPI_ISL_723248, EPI_ISL_723324, EPI_ISL_728663, EPI_ISL_728757, EPI_ISL_790747, EPI_ISL_790882, EPI_ISL_790924, EPI_ISL_904761, EPI_ISL_904783, EPI_ISL_905082, EPI_ISL_905241, EPI_ISL_905590, EPI_ISL_943313, EPI_ISL_1013804, EPI_ISL_1013816, EPI_ISL_1013817, EPI_ISL_1014028, EPI_ISL_1014169, EPI_ISL_1014269, EPI_ISL_1014270, EPI_ISL_1014279, EPI_ISL_1014322, EPI_ISL_1014335, EPI_ISL_1014351, EPI_ISL_1014549, EPI_ISL_1014550, EPI_ISL_1014551, EPI_ISL_1014552, EPI_ISL_1014553, EPI_ISL_1014554, EPI_ISL_1014555, EPI_ISL_1014556, EPI_ISL_1014562, EPI_ISL_1014563, EPI_ISL_1014564, EPI_ISL_1014565, EPI_ISL_1014566, EPI_ISL_1014567, EPI_ISL_1014568, EPI_ISL_1014569, EPI_ISL_1014570, EPI_ISL_1014571, EPI_ISL_1014572, EPI_ISL_1014573, EPI_ISL_1014574, EPI_ISL_1014575, EPI_ISL_1014576, EPI_ISL_1014577, EPI_ISL_1014579, EPI_ISL_1014580, EPI_ISL_1014581, EPI_ISL_1014582, EPI_ISL_1014583, EPI_ISL_1014584, EPI_ISL_1014585, EPI_ISL_1014586, EPI_ISL_1014587, EPI_ISL_1014588, EPI_ISL_1014589, EPI_ISL_1014590, EPI_ISL_1014591, EPI_ISL_1014592, EPI_ISL_1014594, EPI_ISL_1014595, EPI_ISL_1014596, EPI_ISL_1014597, EPI_ISL_1014601, EPI_ISL_1014605, EPI_ISL_1014607, EPI_ISL_1014613, EPI_ISL_1014615, EPI_ISL_1014618, EPI_ISL_1014620, EPI_ISL_1014625, EPI_ISL_1014626, EPI_ISL_1014633, EPI_ISL_1014635, EPI_ISL_1014637, EPI_ISL_1014638, EPI_ISL_1014647, EPI_ISL_1014648, EPI_ISL_1014660, EPI_ISL_1014664, EPI_ISL_1014671, EPI_ISL_1035061, EPI_ISL_1035168, EPI_ISL_1035207, EPI_ISL_1035244, EPI_ISL_1035247, EPI_ISL_1035254, EPI_ISL_1035265, EPI_ISL_1035276, EPI_ISL_1035767, EPI_ISL_1035768, EPI_ISL_1035769, EPI_ISL_1035770, EPI_ISL_1035771, EPI_ISL_1035775, EPI_ISL_1035779, EPI_ISL_1035785, EPI_ISL_1035786, EPI_ISL_1035790, EPI_ISL_1035793, EPI_ISL_1035795, EPI_ISL_1035797, EPI_ISL_1035805, EPI_ISL_1035807, EPI_ISL_1035905, EPI_ISL_1035906, EPI_ISL_1035907, EPI_ISL_1035910, EPI_ISL_1035913, EPI_ISL_1035914, EPI_ISL_1035916, EPI_ISL_1035917, EPI_ISL_1035918, EPI_ISL_1035919, EPI_ISL_1035920, EPI_ISL_1035921, EPI_ISL_1035922, EPI_ISL_1035923, EPI_ISL_1035924, EPI_ISL_1035925, EPI_ISL_1035926, EPI_ISL_1035927, EPI_ISL_1035928, EPI_ISL_1035929, EPI_ISL_1035930, EPI_ISL_1035931, EPI_ISL_1035932, EPI_ISL_1035933, EPI_ISL_1035934, EPI_ISL_1035935, EPI_ISL_1035936, EPI_ISL_1035937, EPI_ISL_1035938, EPI_ISL_1035939, EPI_ISL_1035940, EPI_ISL_1035941, EPI_ISL_1035942, EPI_ISL_1035943, EPI_ISL_1035944, EPI_ISL_1035945, EPI_ISL_1035946, EPI_ISL_1035947, EPI_ISL_1035948, EPI_ISL_1035949, EPI_ISL_1035950, EPI_ISL_1035951, EPI_ISL_1035952, EPI_ISL_1035953, EPI_ISL_1035954, EPI_ISL_1035955, EPI_ISL_1035956, EPI_ISL_1035957, EPI_ISL_1035958, EPI_ISL_1035959, EPI_ISL_1035960, EPI_ISL_1035961, EPI_ISL_1035962, EPI_ISL_1035963, EPI_ISL_1035964, EPI_ISL_1035965, EPI_ISL_1035966, EPI_ISL_1035967, EPI_ISL_1035968, EPI_ISL_1035969, EPI_ISL_1035970, EPI_ISL_1035971, EPI_ISL_1035972, EPI_ISL_1035973, EPI_ISL_1035974, EPI_ISL_1035975, EPI_ISL_1035976, EPI_ISL_1035977, EPI_ISL_1035978, EPI_ISL_1035979, EPI_ISL_1035980, EPI_ISL_1035981, EPI_ISL_1035982, EPI_ISL_1035983, EPI_ISL_1035984, EPI_ISL_1035985, EPI_ISL_1035986, EPI_ISL_1035987, EPI_ISL_1035988, EPI_ISL_1035989, EPI_ISL_1035990, EPI_ISL_1035991, EPI_ISL_1035992, EPI_ISL_1035993, EPI_ISL_1035994, EPI_ISL_1035995, EPI_ISL_1035996, EPI_ISL_1035997, EPI_ISL_1035998, EPI_ISL_1035999, EPI_ISL_1036000, EPI_ISL_1036001, EPI_ISL_1036002, EPI_ISL_1036003, EPI_ISL_1036004, EPI_ISL_1036005, EPI_ISL_1036006, EPI_ISL_1036007, EPI_ISL_1036008, EPI_ISL_1036009, EPI_ISL_1036010, EPI_ISL_1036011, EPI_ISL_1036012, EPI_ISL_1036013, EPI_ISL_1036014, EPI_ISL_1036015, EPI_ISL_1036016, EPI_ISL_1036017, EPI_ISL_1036018, EPI_ISL_1036019, EPI_ISL_1036020, EPI_ISL_1036021, EPI_ISL_1036022, EPI_ISL_1036023, EPI_ISL_1036024, EPI_ISL_1036025, EPI_ISL_1036026, EPI_ISL_1036027, EPI_ISL_1036028, EPI_ISL_1036029, EPI_ISL_1036030, EPI_ISL_1036031, EPI_ISL_1036032, EPI_ISL_1036033, EPI_ISL_1036034, EPI_ISL_1036035, EPI_ISL_1036036, EPI_ISL_1036037, EPI_ISL_1036038, EPI_ISL_1036039, EPI_ISL_1036040, EPI_ISL_1036041, EPI_ISL_1036042, EPI_ISL_1036043, EPI_ISL_1036044, EPI_ISL_1036045, EPI_ISL_1036046, EPI_ISL_1036047, EPI_ISL_1036048, EPI_ISL_1036049, EPI_ISL_1036050, EPI_ISL_1036051, EPI_ISL_1036052, EPI_ISL_1036053, EPI_ISL_1036054, EPI_ISL_1036055, EPI_ISL_1036056, EPI_ISL_1036057, EPI_ISL_1036058, EPI_ISL_1036059, EPI_ISL_1036060, EPI_ISL_1036061, EPI_ISL_1036062, EPI_ISL_1036063, EPI_ISL_1036064, EPI_ISL_1036065, EPI_ISL_1036066, EPI_ISL_1036067, EPI_ISL_1036068, EPI_ISL_1036069, EPI_ISL_1036070, EPI_ISL_1036071, EPI_ISL_1036072, EPI_ISL_1036073, EPI_ISL_1036074, EPI_ISL_1036075, EPI_ISL_1036076, EPI_ISL_1036077, EPI_ISL_1036078, EPI_ISL_1036079, EPI_ISL_1036080, EPI_ISL_1036081, EPI_ISL_1036082, EPI_ISL_1036083, EPI_ISL_1036084, EPI_ISL_1036085, EPI_ISL_1036086, EPI_ISL_1036087, EPI_ISL_1036088, EPI_ISL_1036089, EPI_ISL_1036090, EPI_ISL_1036091, EPI_ISL_1036092, EPI_ISL_1036093, EPI_ISL_1036094, EPI_ISL_1036095, EPI_ISL_1036096, EPI_ISL_1036097, EPI_ISL_1036098, EPI_ISL_1036099, EPI_ISL_1036100, EPI_ISL_1036101, EPI_ISL_1036102, EPI_ISL_1036103, EPI_ISL_1036104, EPI_ISL_1036105, EPI_ISL_1036106, EPI_ISL_1036107, EPI_ISL_1036108, EPI_ISL_1036109, EPI_ISL_1036110, EPI_ISL_1036111, EPI_ISL_1036112, EPI_ISL_1036113, EPI_ISL_1036114, EPI_ISL_1036115, EPI_ISL_1036116, EPI_ISL_1036117, EPI_ISL_1036118, EPI_ISL_1036119, EPI_ISL_1036120, EPI_ISL_1036121, EPI_ISL_1036122, EPI_ISL_1036123, EPI_ISL_1036124, EPI_ISL_1036125, EPI_ISL_1036126, EPI_ISL_1036127, EPI_ISL_1036128, EPI_ISL_1036129, EPI_ISL_1036130, EPI_ISL_1036131, EPI_ISL_1036132, EPI_ISL_1036133, EPI_ISL_1036134, EPI_ISL_1036135, EPI_ISL_1036136, EPI_ISL_1036137, EPI_ISL_1036138, EPI_ISL_1036139, EPI_ISL_1036140, EPI_ISL_1036141, EPI_ISL_1036142, EPI_ISL_1036143, EPI_ISL_1036144, EPI_ISL_1036145, EPI_ISL_1036146, EPI_ISL_1036147, EPI_ISL_1036148, EPI_ISL_1036149, EPI_ISL_1036150, EPI_ISL_1036151, EPI_ISL_1036152, EPI_ISL_1036153, EPI_ISL_1036154, EPI_ISL_1036155, EPI_ISL_1036156, EPI_ISL_1036157, EPI_ISL_1036158, EPI_ISL_1036159, EPI_ISL_1036160, EPI_ISL_1036161, EPI_ISL_1036162, EPI_ISL_1036163, EPI_ISL_1036164, EPI_ISL_1036165, EPI_ISL_1036166, EPI_ISL_1036167, EPI_ISL_1036168, EPI_ISL_1036169, EPI_ISL_1036170, EPI_ISL_1036171, EPI_ISL_1036172, EPI_ISL_1036173, EPI_ISL_1036174, EPI_ISL_1036175, EPI_ISL_1036176, EPI_ISL_1036177, EPI_ISL_1036178, EPI_ISL_1036179, EPI_ISL_1036180, EPI_ISL_1036181, EPI_ISL_1036182, EPI_ISL_1036183, EPI_ISL_1036184, EPI_ISL_1036185, EPI_ISL_1036186, EPI_ISL_1036187, EPI_ISL_1036188, EPI_ISL_1036189, EPI_ISL_1036190, EPI_ISL_1036191, EPI_ISL_1036192, EPI_ISL_1036193, EPI_ISL_1036194, EPI_ISL_1036195, EPI_ISL_1036196, EPI_ISL_1036197, EPI_ISL_1036198, EPI_ISL_1036199, EPI_ISL_1036200, EPI_ISL_1036201, EPI_ISL_1036202, EPI_ISL_1036203, EPI_ISL_1036204, EPI_ISL_1036205, EPI_ISL_1036206, EPI_ISL_1036207, EPI_ISL_1036208, EPI_ISL_1036209, EPI_ISL_1036210, EPI_ISL_1036211, EPI_ISL_1036212, EPI_ISL_1036213, EPI_ISL_1036214, EPI_ISL_1036215, EPI_ISL_1036216, EPI_ISL_1036217, EPI_ISL_1036218, EPI_ISL_1036219, EPI_ISL_1036220, EPI_ISL_1036221, EPI_ISL_1036222, EPI_ISL_1036223, EPI_ISL_1036224, EPI_ISL_1036225, EPI_ISL_1036226, EPI_ISL_1036227, EPI_ISL_1036228, EPI_ISL_1036229, EPI_ISL_1036230, EPI_ISL_1036231, EPI_ISL_1036232, EPI_ISL_1036233, EPI_ISL_1036234, EPI_ISL_1036235, EPI_ISL_1036236, EPI_ISL_1036237, EPI_ISL_1036238, EPI_ISL_1036239, EPI_ISL_1036240, EPI_ISL_1036241, EPI_ISL_1036242, EPI_ISL_1036243, EPI_ISL_1036244, EPI_ISL_1036245, EPI_ISL_1036246, EPI_ISL_1036247, EPI_ISL_1036248, EPI_ISL_1036249, EPI_ISL_1036250, EPI_ISL_1036251, EPI_ISL_1036252, EPI_ISL_1036253, EPI_ISL_1036254, EPI_ISL_1036255, EPI_ISL_1036256, EPI_ISL_1036257, EPI_ISL_1036258, EPI_ISL_1036259, EPI_ISL_1036260, EPI_ISL_1036261, EPI_ISL_1036262, EPI_ISL_1036263, EPI_ISL_1036264, EPI_ISL_1036265, EPI_ISL_1036266, EPI_ISL_1036267, EPI_ISL_1036268, EPI_ISL_1036269, EPI_ISL_1036270, EPI_ISL_1036271, EPI_ISL_1036272, EPI_ISL_1036273, EPI_ISL_1036274, EPI_ISL_1036275, EPI_ISL_1036276, EPI_ISL_1036277, EPI_ISL_1036278, EPI_ISL_1036279, EPI_ISL_1036280, EPI_ISL_1036281, EPI_ISL_1036282, EPI_ISL_1036283, EPI_ISL_1036284, EPI_ISL_1036285, EPI_ISL_1036286, EPI_ISL_1036287, EPI_ISL_1036288, EPI_ISL_1036289, EPI_ISL_1036290, EPI_ISL_1036291, EPI_ISL_1036292, EPI_ISL_1036293, EPI_ISL_1036294, EPI_ISL_1036295, EPI_ISL_1036296, EPI_ISL_1036297, EPI_ISL_1036298, EPI_ISL_1036299, EPI_ISL_1036300, EPI_ISL_1036301, EPI_ISL_1036302, EPI_ISL_1036303, EPI_ISL_1036304, EPI_ISL_1036305, EPI_ISL_1036306, EPI_ISL_1036307, EPI_ISL_1036308, EPI_ISL_1036309, EPI_ISL_1036310, EPI_ISL_1036311, EPI_ISL_1036312, EPI_ISL_1036313, EPI_ISL_1036314, EPI_ISL_1036315, EPI_ISL_1036316, EPI_ISL_1036317, EPI_ISL_1036318, EPI_ISL_1036319, EPI_ISL_1036320, EPI_ISL_1036321, EPI_ISL_1036322, EPI_ISL_1036323, EPI_ISL_1036324, EPI_ISL_1036325, EPI_ISL_1036326, EPI_ISL_1036327, EPI_ISL_1036328, EPI_ISL_1036329, EPI_ISL_1036330, EPI_ISL_1036331, EPI_ISL_1036332, EPI_ISL_1036333, EPI_ISL_1036334, EPI_ISL_1036335, EPI_ISL_1036336, EPI_ISL_1036337, EPI_ISL_1036338, EPI_ISL_1036339, EPI_ISL_1036340, EPI_ISL_1036341, EPI_ISL_1036342, EPI_ISL_1036343, EPI_ISL_1036344, EPI_ISL_1036345, EPI_ISL_1036346, EPI_ISL_1036347, EPI_ISL_1036348, EPI_ISL_1036349, EPI_ISL_1036350, EPI_ISL_1036351, EPI_ISL_1036352, EPI_ISL_1036353, EPI_ISL_1036354, EPI_ISL_1036355, EPI_ISL_1036356, EPI_ISL_1036357, EPI_ISL_1036358, EPI_ISL_1036359, EPI_ISL_1036360, EPI_ISL_1036361, EPI_ISL_1036362, EPI_ISL_1036363, EPI_ISL_1036364, EPI_ISL_1036365, EPI_ISL_1036366, EPI_ISL_1036367, EPI_ISL_1036368, EPI_ISL_1036369, EPI_ISL_1036370, EPI_ISL_1036371, EPI_ISL_1036372, EPI_ISL_1036373, EPI_ISL_1036374, EPI_ISL_1036375, EPI_ISL_1036376, EPI_ISL_1036377, EPI_ISL_1036378, EPI_ISL_1036379, EPI_ISL_1036380, EPI_ISL_1036381, EPI_ISL_1036382, EPI_ISL_1036383, EPI_ISL_1036384, EPI_ISL_1036385, EPI_ISL_1036386, EPI_ISL_1036387, EPI_ISL_1036388, EPI_ISL_1036389, EPI_ISL_1036390, EPI_ISL_1036391, EPI_ISL_1036392, EPI_ISL_1036393, EPI_ISL_1036394, EPI_ISL_1036395, EPI_ISL_1036396, EPI_ISL_1036397, EPI_ISL_1036398, EPI_ISL_1036399, EPI_ISL_1036400, EPI_ISL_1036401, EPI_ISL_1036402, EPI_ISL_1036403, EPI_ISL_1036404, EPI_ISL_1036405, EPI_ISL_1036406, EPI_ISL_1036407, EPI_ISL_1036408, EPI_ISL_1036409, EPI_ISL_1036410, EPI_ISL_1036411, EPI_ISL_1036412, EPI_ISL_1036413, EPI_ISL_1036414, EPI_ISL_1036415, EPI_ISL_1036416, EPI_ISL_1036417, EPI_ISL_1036418, EPI_ISL_1036419, EPI_ISL_1036420, EPI_ISL_1036421, EPI_ISL_1036422, EPI_ISL_1036423, EPI_ISL_1036424, EPI_ISL_1036425, EPI_ISL_1036426, EPI_ISL_1036427, EPI_ISL_1036428, EPI_ISL_1036429, EPI_ISL_1036430, EPI_ISL_1036431, EPI_ISL_1036432, EPI_ISL_1036433, EPI_ISL_1036434, EPI_ISL_1036435, EPI_ISL_1036436, EPI_ISL_1036437, EPI_ISL_1036438, EPI_ISL_1036439, EPI_ISL_1036440, EPI_ISL_1036441, EPI_ISL_1036442, EPI_ISL_1036443, EPI_ISL_1036444, EPI_ISL_1036445, EPI_ISL_1036446, EPI_ISL_1036447, EPI_ISL_1036448, EPI_ISL_1036449, EPI_ISL_1036450, EPI_ISL_1036451, EPI_ISL_1036452, EPI_ISL_1036453, EPI_ISL_1036454, EPI_ISL_1036455, EPI_ISL_1036456, EPI_ISL_1036457, EPI_ISL_1036458, EPI_ISL_1036 |                                                                                                                                        |                                                                                                                                        |                                                                                                                                                                                                                                                                                                                                                                                                                                                                                                          |



|                                                                                                                                                                                                                                                                                                                                                |                                                                                                       |                                                                                                                                                                               |                                                                                                                                                                                                                                                                                                             |
|------------------------------------------------------------------------------------------------------------------------------------------------------------------------------------------------------------------------------------------------------------------------------------------------------------------------------------------------|-------------------------------------------------------------------------------------------------------|-------------------------------------------------------------------------------------------------------------------------------------------------------------------------------|-------------------------------------------------------------------------------------------------------------------------------------------------------------------------------------------------------------------------------------------------------------------------------------------------------------|
| EPI_ISL_708822                                                                                                                                                                                                                                                                                                                                 | Emergency Operation Center, (EOC)                                                                     | National Institute of Health, Department of Medical Sciences, Ministry of Public Health, Thailand                                                                             | Malinee Chittaganpitch; Pakorn Piromtong; Pilailuk Okada; Siripaporn Phuygun; Sittiporn Parnmen; Sunthareeya Waicharoen; Thanutsapa Thanadachakul; Warawan Wongboot                                                                                                                                         |
| EPI_ISL_1122016                                                                                                                                                                                                                                                                                                                                | Emergency department of COVID-19, Beijing Ditan Hospital                                              | National Institute for Viral Disease Control and Prevention                                                                                                                   | 3*; Di Tian1; Gang Liu1; Gang Wan1; Jianbo Tan1; Long Liu1; Pan Xiang1; Shuangli Zhu2; Shuping Cui1; Tingyu Zhang1; Wei Zhang1#; Wenbo Xu2# and Zhihai Chen1#; Xianbo Wang1; Xiang Zhao2; Yang Song2*; Yanhai Wang2; Yanli Xu1; Yu Wang1; Ziruo Ge1*                                                        |
| EPI_ISL_1122017                                                                                                                                                                                                                                                                                                                                | Emergency department of COVID-19, Beijing Ditan Hospital, Capital Medical University, Beijing, China. | National Institute for Viral Disease Control and Prevention                                                                                                                   | 3*; Di Tian1; Gang Liu1; Gang Wan1; Jianbo Tan1; Long Liu1; Pan Xiang1; Shuangli Zhu2; Shuping Cui1; Tingyu Zhang1; Wei Zhang1#; Wenbo Xu2# and Zhihai Chen1#; Xianbo Wang1; Xiang Zhao2; Yang Song2*; Yanhai Wang2; Yanli Xu1; Yu Wang1; Ziruo Ge1*                                                        |
| EPI_ISL_683703                                                                                                                                                                                                                                                                                                                                 | Essentia Health-St. Mary's Medical Center                                                             | Minnesota Department of Health, Public Health Laboratory                                                                                                                      | Alexandra Lorentz; Jacob Garfin; Matt Plumb; and Xiong Wang                                                                                                                                                                                                                                                 |
| EPI_ISL_875880, EPI_ISL_875885, EPI_ISL_875937, EPI_ISL_883207, EPI_ISL_884116, EPI_ISL_1097645, EPI_ISL_1097653, EPI_ISL_1097659, EPI_ISL_1097664, EPI_ISL_1097706                                                                                                                                                                            | see above                                                                                             | Eurofins Diatherix                                                                                                                                                            | HudsonAlpha Genome Sequencing Center                                                                                                                                                                                                                                                                        |
|                                                                                                                                                                                                                                                                                                                                                |                                                                                                       |                                                                                                                                                                               | Ada Stewart; Jane Grimwood; Jenell Webber; Jennifer Cart; John Lovell; Joshua Stough; Leslie Malone; Lori H. Handley; Melissa Williams; Stefan Brzezinski; Teresa Jones; and Jeremy Schmutz                                                                                                                 |
| EPI_ISL_752605                                                                                                                                                                                                                                                                                                                                 | Faculty of Medicine, Al-Quds University                                                               | Faculty of Medicine, Al-Quds University                                                                                                                                       | A. and Al-Jawabreh, A.; Ereqat, S.; Nasereddin                                                                                                                                                                                                                                                              |
| EPI_ISL_1040681, EPI_ISL_1040779, EPI_ISL_1040780                                                                                                                                                                                                                                                                                              | False Bay Hospital wc FBH                                                                             | NHL/UCT                                                                                                                                                                       | Arash Iranzadeh; Bruna Galvao; Carolyn Williamson; Deelan Doolabh; Diana Hardie; Innocent Mudau; Kruger Marais; Lynn Tyers; Marvin Hsiao; Stephen Korsman                                                                                                                                                   |
| EPI_ISL_480812, EPI_ISL_848698, EPI_ISL_935434                                                                                                                                                                                                                                                                                                 | Florida Bureau of Public Health Laboratories                                                          | Florida Bureau of Public Health Laboratories                                                                                                                                  | Jason Blanton; Sarah Schmedes                                                                                                                                                                                                                                                                               |
| EPI_ISL_912353, EPI_ISL_912356, EPI_ISL_912357, EPI_ISL_912359, EPI_ISL_912361, EPI_ISL_912364, EPI_ISL_912365, EPI_ISL_912367, EPI_ISL_912370, EPI_ISL_912373, EPI_ISL_912374, EPI_ISL_912375, EPI_ISL_912376, EPI_ISL_912377, EPI_ISL_912378, EPI_ISL_912380, EPI_ISL_912387, EPI_ISL_912388, EPI_ISL_912389, EPI_ISL_912390, EPI_ISL_912391 | see above                                                                                             | Fondation Congolaise pour la recherche medicale (FCRM), Francine Ntoumi                                                                                                       | NGS Competence Center Tuebingen, Institut für Medizinische Mikrobiologie und Hygiene, Universitaetsklinikum Tübingen                                                                                                                                                                                        |
|                                                                                                                                                                                                                                                                                                                                                |                                                                                                       |                                                                                                                                                                               | Angel Angelov                                                                                                                                                                                                                                                                                               |
| EPI_ISL_894785                                                                                                                                                                                                                                                                                                                                 | Fukuoka Institute of Health and Environmental Sciences                                                | Pathogen Genomics Center, National Institute of Infectious Diseases                                                                                                           | Kentaro Itokawa; Makoto Kuroda; Masanori Hashino; Rina Tanaka; Tsuyoshi Sekizuka                                                                                                                                                                                                                            |
| EPI_ISL_1026965                                                                                                                                                                                                                                                                                                                                | Fulgent Genetics                                                                                      | Fulgent Genetics                                                                                                                                                              | Becky Tsai; Benafsh Sapra; Doreen Ng; Harry Gao; James Xie; John Gao; Joseph Fierro; Mickey Li; Yan Meng                                                                                                                                                                                                    |
| EPI_ISL_794649, EPI_ISL_794650                                                                                                                                                                                                                                                                                                                 | Fundación Cardio Infantil                                                                             | Instituto Nacional de Salud - Dirección de Investigación en Salud Pública                                                                                                     | Carlos Franco-Muñoz; Diego A. Álvarez-Díaz; Diego Andrés Prada; Gerardo Santamaría; Jonathan Reales; Julian Naizaque; Katherine Laiton-Donato; Magdalena Wiesner; Marcela Mercado-Reyes; María T. Herrera; Martha Lucia Ospina Martinez; Mauricio Pacheco-Montealegre; Paola Muñoz-Laiton; Sheryl Corchuelo |
| EPI_ISL_794654                                                                                                                                                                                                                                                                                                                                 | Fundación Valle del Lili                                                                              | Instituto Nacional de Salud - Dirección de Investigación en Salud Pública                                                                                                     | Carlos Franco-Muñoz; Diego A. Álvarez-Díaz; Diego Andrés Prada; Gerardo Santamaría; Jonathan Reales; Julian Naizaque; Katherine Laiton-Donato; Magdalena Wiesner; Marcela Mercado-Reyes; María T. Herrera; Martha Lucia Ospina Martinez; Mauricio Pacheco-Montealegre; Paola Muñoz-Laiton; Sheryl Corchuelo |
| EPI_ISL_493369, EPI_ISL_549077, EPI_ISL_775526                                                                                                                                                                                                                                                                                                 | Furst Medical Laboratory                                                                              | Norwegian Institute of Public Health, Department of Virology                                                                                                                  | Atiya R Ali; Hilde Elshaug; Hilde Synnøve Vollen; Hilde Vollen; Kamilla Heddeland Instefjord; Karoline Bragstad; Kathrine Stene-Johansen; Marie Paulsen Madsen; Olav Hungnes; Rasmus Riis Kopperud                                                                                                          |
| EPI_ISL_566087, EPI_ISL_812180, EPI_ISL_812187, EPI_ISL_812189                                                                                                                                                                                                                                                                                 | GA Department of Public Health Laboratory                                                             | Pathogen Discovery, Respiratory Viruses Branch, Division of Viral Diseases, Centers for Disease Control and Prevention                                                        | Anna Montmayeur; Anna Uehara; Brian Lynch; Clinton R. Paden; Haibin Wang; Jing Zhang; Krista Queen; Peter Cook; Rachel Marine; Suxiang Tong; Yan Li; Ying Tao                                                                                                                                               |
| EPI_ISL_825055                                                                                                                                                                                                                                                                                                                                 | GMERS Medical College and Hospital, Gotri, Vadodara                                                   | Gujarat Biotechnology Research Centre                                                                                                                                         | Afzal Ansari; Apurvashin Puvar; Bithika Duttaroy; Chaitanya Joshi; Dinesh Kumar; Janvi Raval; Kalpesh Mistry; Madhvi Joshi; Mitesh Kamothi; Nikha Trivedi; Nitin Savaliya; Ramesh Pandit; Zama Patel; Zuber Saiyed                                                                                          |
| EPI_ISL_534250                                                                                                                                                                                                                                                                                                                                 | Gavle Sjukhus                                                                                         | The Public Health Agency of Sweden                                                                                                                                            | Anna Risberg; Anna-Malin Linde; Karin Tegmark-Wisell; Maria Lind Karlberg; Mattias Haukland; Mia Brytting; Olov Svartstrom; Oskar Karlsson Lindsjö; Petra Edquist; Reza Advani; Sandra Brodsson                                                                                                             |
| EPI_ISL_730568, EPI_ISL_730569, EPI_ISL_730574, EPI_ISL_730577, EPI_ISL_730620, EPI_ISL_984738                                                                                                                                                                                                                                                 | Gazi University Faculty of Medicine, Medical Virology Laboratory                                      | Gazi University Faculty of Medicine, Medical Virology Laboratory                                                                                                              | Erdem ahin; Gülendem Bozday; Hager Muftah; Il Fidan; Kayhan Çalar; Murat Dizbay; Selin Yiit; Shaknoza Sarzhanova; Özlem Güzel Tunçcan                                                                                                                                                                       |
| EPI_ISL_900502                                                                                                                                                                                                                                                                                                                                 | Gen-Bio                                                                                               | CNR Virus des Infections Respiratoires - France SUD                                                                                                                           | Antonin Bal; Bruno Lina; Gregory Destras; Gwendolyne Burfin; Hadrien Règue; Laurence Josset; Martine Valette; Quentin Semanas; Sylvie Larrat                                                                                                                                                                |
| EPI_ISL_964882                                                                                                                                                                                                                                                                                                                                 | General Hospital "Abdulah Nakas" Sarajevo                                                             | Alea Genetic Centre                                                                                                                                                           | Adis Kandic; Dino Pecar; Lana Salihfendic; Rijad Konjhozic; Sead Jazic                                                                                                                                                                                                                                      |
| EPI_ISL_958751                                                                                                                                                                                                                                                                                                                                 | General Hospital - Bitola                                                                             | Research Center for Genetic Engineering and Biotechnology "Georgi D. Efremov" , Macedonian Academy of Sciences and Arts                                                       | Aleksandar J. Dimovski; Dijana Plasheska-Karanfilska; Gjorgji Bozinovski; Milena Jakimovska; Predrag Noveski                                                                                                                                                                                                |
| EPI_ISL_1013450                                                                                                                                                                                                                                                                                                                                | General Hospital - Kumanovo                                                                           | Research Center for Genetic Engineering and Biotechnology "Georgi D. Efremov" , Macedonian Academy of Sciences and Arts                                                       | Aleksandar J. Dimovski; Dijana Plasheska-Karanfilska; Gjorgji Bozinovski; Milena Jakimovska; Predrag Noveski                                                                                                                                                                                                |
| EPI_ISL_677674, EPI_ISL_933766, EPI_ISL_1014762                                                                                                                                                                                                                                                                                                | General Hospital - Prilep                                                                             | Research Center for Genetic Engineering and Biotechnology "Georgi D. Efremov" , Macedonian Academy of Sciences and Arts                                                       | Aleksandar J. Dimovski; Dijana Plasheska-Karanfilska; Gjorgji Bozinovski; Milena Jakimovska; Predrag Noveski; RCGEB - MASA                                                                                                                                                                                  |
| EPI_ISL_933571                                                                                                                                                                                                                                                                                                                                 | General Hospital - Shtip                                                                              | Research Center for Genetic Engineering and Biotechnology "Georgi D. Efr                                                                                                      | RCGEB - MASA                                                                                                                                                                                                                                                                                                |
| EPI_ISL_959288                                                                                                                                                                                                                                                                                                                                 | General Hospital - Shtip                                                                              | Research Center for Genetic Engineering and Biotechnology "Georgi D. Efremov" , Macedonian Academy of Sciences and Arts                                                       | Aleksandar J. Dimovski; Dijana Plasheska-Karanfilska; Gjorgji Bozinovski; Milena Jakimovska; Predrag Noveski                                                                                                                                                                                                |
| EPI_ISL_1018218, EPI_ISL_1018219                                                                                                                                                                                                                                                                                                               | General Hospital - Struga                                                                             | Research Center for Genetic Engineering and Biotechnology "Georgi D. Efremov" , Macedonian Academy of Sciences and Arts                                                       | Aleksandar J. Dimovski; Dijana Plasheska-Karanfilska; Gjorgji Bozinovski; Milena Jakimovska; Predrag Noveski                                                                                                                                                                                                |
| EPI_ISL_933726, EPI_ISL_944106                                                                                                                                                                                                                                                                                                                 | General Hospital - Strumica                                                                           | Research Center for Genetic Engineering and Biotechnology "Georgi D. Efremov" , Macedonian Academy of Sciences and Arts                                                       | Aleksandar J. Dimovski; Dijana Plasheska-Karanfilska; Gjorgji Bozinovski; Milena Jakimovska; Predrag Noveski; RCGEB - MASA                                                                                                                                                                                  |
| EPI_ISL_943996, EPI_ISL_1014764                                                                                                                                                                                                                                                                                                                | General Hospital - Tetovo                                                                             | Research Center for Genetic Engineering and Biotechnology "Georgi D. Efremov" , Macedonian Academy of Sciences and Arts                                                       | Aleksandar J. Dimovski; Dijana Plasheska-Karanfilska; Gjorgji Bozinovski; Milena Jakimovska; Predrag Noveski                                                                                                                                                                                                |
| EPI_ISL_933660, EPI_ISL_943995                                                                                                                                                                                                                                                                                                                 | General Hospital - Veles                                                                              | Research Center for Genetic Engineering and Biotechnology "Georgi D. Efremov" , Macedonian Academy of Sciences and Arts                                                       | Aleksandar J. Dimovski; Dijana Plasheska-Karanfilska; Gjorgji Bozinovski; Milena Jakimovska; Predrag Noveski; RCGEB - MASA                                                                                                                                                                                  |
| EPI_ISL_747243                                                                                                                                                                                                                                                                                                                                 | General Hospital Laboratory                                                                           | Pathogen Laboratory (BSL3), Biomedical Innovation Department, Experimental and Applied Biology Division, Scientific Research Center and High Education from Ensenada (CICESE) | Cervantes-Luevano K.; Galindo C. and Licea-Navarro A.; Martinez M.A.; Saavedra-Flores A.                                                                                                                                                                                                                    |
| EPI_ISL_406798                                                                                                                                                                                                                                                                                                                                 | General Hospital of Central Theater Command of People's                                               | BGI & Institute of Microbiology, Chinese Academy of Sciences                                                                                                                  | Weifeng Shi and Zhenhong Hu; Weijun Chen; Yuhai Bi                                                                                                                                                                                                                                                          |

|                                                                                                                                                |                          |                                                                                                                                                                      |                                                                                                                                                                                                                                                                                                                                                                                                                                                                    |
|------------------------------------------------------------------------------------------------------------------------------------------------|--------------------------|----------------------------------------------------------------------------------------------------------------------------------------------------------------------|--------------------------------------------------------------------------------------------------------------------------------------------------------------------------------------------------------------------------------------------------------------------------------------------------------------------------------------------------------------------------------------------------------------------------------------------------------------------|
|                                                                                                                                                | Liberation Army of China | & Shandong First Medical University & Shandong Academy of Medical Sciences & General Hospital of Central Theater Command of People's Liberation Army of China        |                                                                                                                                                                                                                                                                                                                                                                                                                                                                    |
| EPI_ISL_746485, EPI_ISL_746668, EPI_ISL_746723, EPI_ISL_746728, EPI_ISL_746729, EPI_ISL_746730, EPI_ISL_746768, EPI_ISL_746786, EPI_ISL_746815 | see above                | Genetica Molecular and Subdepartamento de Virologia ISP Chile                                                                                                        | Instituto de Salud Publica de Chile                                                                                                                                                                                                                                                                                                                                                                                                                                |
|                                                                                                                                                | EPI_ISL_480263           | Genomic Laboratory (GLAB) (Conjoint lab of Health Directorate of Istanbul and Istanbul Technical University)                                                         | Genomic Laboratory (GLAB), Istanbul Technical University                                                                                                                                                                                                                                                                                                                                                                                                           |
|                                                                                                                                                | EPI_ISL_632908           | Genomic Sciences, Rehman Medical Institute                                                                                                                           | Genomic Sciences, Rehman Medical Institute                                                                                                                                                                                                                                                                                                                                                                                                                         |
| EPI_ISL_1081423, EPI_ISL_1081443, EPI_ISL_1081446, EPI_ISL_1081482                                                                             |                          | Genomica Lab Molecular, M@xico                                                                                                                                       | Andersen lab at Scripps Research                                                                                                                                                                                                                                                                                                                                                                                                                                   |
| EPI_ISL_812802, EPI_ISL_812816                                                                                                                 |                          | Genomics Program, Children Cancer Hospital                                                                                                                           | Genomics Program, Children Cancer Hospital                                                                                                                                                                                                                                                                                                                                                                                                                         |
| EPI_ISL_960684, EPI_ISL_960779, EPI_ISL_960805                                                                                                 |                          | Germano de sousa                                                                                                                                                     | Instituto Gulbenkian de Ciencia                                                                                                                                                                                                                                                                                                                                                                                                                                    |
| EPI_ISL_746157                                                                                                                                 |                          | Ginkgo Bioworks Clinical Laboratory                                                                                                                                  | Utah Public Health Laboratory                                                                                                                                                                                                                                                                                                                                                                                                                                      |
| EPI_ISL_890194                                                                                                                                 |                          | Gonoshasthaya-RNA Research Center, Gonoshasthaya-RNA Molecular Diagnostics and Research Center                                                                       | Gonoshasthaya-RNA Research Center, Gonoshasthaya-RNA Molecular Diagnostics and Research Center                                                                                                                                                                                                                                                                                                                                                                     |
| EPI_ISL_496642, EPI_ISL_496653, EPI_ISL_496664, EPI_ISL_496695, EPI_ISL_496736, EPI_ISL_496766, EPI_ISL_496770                                 | see above                | Gorgas Memorial Laboratory of Health Studies                                                                                                                         | Gorgas Memorial Laboratory of Health Studies                                                                                                                                                                                                                                                                                                                                                                                                                       |
| EPI_ISL_906306                                                                                                                                 |                          | Gorgas memorial Institute For Health Studies                                                                                                                         | Gorgas memorial Institute For Health Studies                                                                                                                                                                                                                                                                                                                                                                                                                       |
| EPI_ISL_1001458                                                                                                                                |                          | Gorgas memorial Institute for Health Studies                                                                                                                         | Gorgas memorial Institute for Health Studies                                                                                                                                                                                                                                                                                                                                                                                                                       |
| EPI_ISL_794818, EPI_ISL_794819, EPI_ISL_794820                                                                                                 |                          | Greek Genome Center, Biomedical Research Foundation of the Academy of Athens (BRFAA)                                                                                 | Greek Genome Center, Biomedical Research Foundation of the Academy of Athens (BRFAA)                                                                                                                                                                                                                                                                                                                                                                               |
| EPI_ISL_640041                                                                                                                                 |                          | Green Point CDC wc GPH                                                                                                                                               | NHLS/UCT                                                                                                                                                                                                                                                                                                                                                                                                                                                           |
| EPI_ISL_640054                                                                                                                                 |                          | Groote Schuur Hospital wc GSH                                                                                                                                        | NHLS/UCT                                                                                                                                                                                                                                                                                                                                                                                                                                                           |
| EPI_ISL_960126                                                                                                                                 |                          | Groote Schuur Hospital wc GSH                                                                                                                                        | National Health Laboratory Service/UCT                                                                                                                                                                                                                                                                                                                                                                                                                             |
| EPI_ISL_698120, EPI_ISL_698538, EPI_ISL_698948                                                                                                 |                          | Group 42 (G42) Healthcare, Abu Dhabi, United Arab Emirates; Department of Health, The United Arab Emirates                                                           | G42 Healthcare                                                                                                                                                                                                                                                                                                                                                                                                                                                     |
| EPI_ISL_981421                                                                                                                                 |                          | Groupe LCD                                                                                                                                                           | Department of Virology, Henri Mondor University Hospital, Assistance Publique Hôpitaux de Paris, Université Paris-Est Créteil, INSERM U955                                                                                                                                                                                                                                                                                                                         |
| EPI_ISL_729737                                                                                                                                 |                          | Grubaugh Lab - Yale School of Public Health                                                                                                                          | Grubaugh Lab - Yale School of Public Health                                                                                                                                                                                                                                                                                                                                                                                                                        |
| EPI_ISL_447736, EPI_ISL_447752                                                                                                                 |                          | Grupo de Investigaciones Microbiológicas-UR (GIMUR), Departamento de Biología, Facultad de Ciencias Naturales, Universidad del Rosario, Bogotá, Colombia             | Grupo de Investigaciones Microbiológicas-UR (GIMUR), Departamento de Biología, Facultad de Ciencias Naturales, Universidad del Rosario, Bogotá, Colombia Instituto Nacional de Salud, Bogotá, Colombia Icahn School of Medicine at Mount Sinai, New York, USA                                                                                                                                                                                                      |
| EPI_ISL_1040921                                                                                                                                |                          | Grupo de Investigación en Enfermedades Tropicales del Ejército (GINETEJ), Laboratorio de Referencia e Investigación, Dirección de Sanidad Ejército, Bogotá, Colombia | Centro de Investigaciones en Microbiología y Biotecnología-UR (CIMBIUR), Facultad de Ciencias Naturales, Universidad del Rosario, Bogotá, Colombia                                                                                                                                                                                                                                                                                                                 |
| EPI_ISL_444969                                                                                                                                 |                          | Guangzhou Eighth People's Hospital (Jiahe Sector)                                                                                                                    | Institute of Human Virology, Zhongshan School of Medicine, Sun Yat-sen University                                                                                                                                                                                                                                                                                                                                                                                  |
| EPI_ISL_509699                                                                                                                                 |                          | Guatemala Ministry of Public Health                                                                                                                                  | Pathogen Discovery, Respiratory Viruses Branch, Division of Viral Diseases, Centers for Disease Control and Prevention                                                                                                                                                                                                                                                                                                                                             |
| EPI_ISL_547704, EPI_ISL_661037, EPI_ISL_661156, EPI_ISL_661169, EPI_ISL_942750, EPI_ISL_942799, EPI_ISL_1113223                                | see above                | Gundersen Molecular Diagnostics Laboratory                                                                                                                           | Kabara Cancer Research Institute                                                                                                                                                                                                                                                                                                                                                                                                                                   |
| EPI_ISL_639957, EPI_ISL_733355, EPI_ISL_733375, EPI_ISL_873027                                                                                 |                          | HELIX LLC                                                                                                                                                            | WHO National Influenza Centre Russian Federation                                                                                                                                                                                                                                                                                                                                                                                                                   |
| EPI_ISL_1117993                                                                                                                                |                          | HG Pharma GmbH                                                                                                                                                       | Berghthaler laboratory, CeMM Research Center for Molecular Medicine of the Austrian Academy of Sciences                                                                                                                                                                                                                                                                                                                                                            |
| EPI_ISL_914827                                                                                                                                 |                          | HLE - ASOCIACION DE ALBERGUE PARA ANCIANOS DE GOLFITO                                                                                                                | Incienza, Instituto Costarricense de Investigación y Enseñanza en Nutrición y Salud                                                                                                                                                                                                                                                                                                                                                                                |
| EPI_ISL_914815, EPI_ISL_914816, EPI_ISL_914817, EPI_ISL_914818                                                                                 |                          | HOSPITAL DE NIÑOS DR. CARLOS SAENZ HERRERA                                                                                                                           | Incienza, Instituto Costarricense de Investigación y Enseñanza en Nutrición y Salud                                                                                                                                                                                                                                                                                                                                                                                |
| EPI_ISL_914821, EPI_ISL_914822                                                                                                                 |                          | HOSPITAL DR. ENRIQUE BALTODANO BRICEÑO                                                                                                                               | Incienza, Instituto Costarricense de Investigación y Enseñanza en Nutrición y Salud                                                                                                                                                                                                                                                                                                                                                                                |
| EPI_ISL_914801                                                                                                                                 |                          | HOSPITAL DR. TOMAS CASAS CASAJUS                                                                                                                                     | Incienza, Instituto Costarricense de Investigación y Enseñanza en Nutrición y Salud                                                                                                                                                                                                                                                                                                                                                                                |
|                                                                                                                                                |                          |                                                                                                                                                                      | Andres Castillo; Barbara Parra; Gisselle Barra; Jaime Lagos; Javier Tognarelli; Jorge Fernandez; Loredana Arata; Patricia Bustos; Rodrigo Fasce                                                                                                                                                                                                                                                                                                                    |
|                                                                                                                                                |                          |                                                                                                                                                                      | Arzu Iverm; Betsi Köse; Bugra Agoaglu; Elifnaz Çelik; Gizem Alkurt; Gizem Dinler Doganay; Ilker Karacan; Jale Yildiz; Levent Doganay; Mehtap Aydn; Ozlem Akgun Dogan; Tugba Kizilboga Akgun; Yasemin Kendir Demirkol                                                                                                                                                                                                                                               |
|                                                                                                                                                |                          |                                                                                                                                                                      | Afridi; Ali, J.; H. and Jehanzeb, V.; Haider; Jan; S.A.; Sabiha, B.; U.K.                                                                                                                                                                                                                                                                                                                                                                                          |
|                                                                                                                                                |                          |                                                                                                                                                                      | Jose Horacio Reyna Verdugo; Jose Roman Chavez Mendez; Luis Alberto Rangel Gonzalez; Martin Gonzalez Ibarra; SEARCH Alliance San Diego with Jonathan Gonzalez Garcia                                                                                                                                                                                                                                                                                                |
|                                                                                                                                                |                          |                                                                                                                                                                      | Abdo, I.; Abouelnaga, S.; Amer, K.; Bakry, U.; Diab, A.; El-Shaqngery, H.; El-Zayat, M.; Farawaly, H.; Gomaa, C.; Hadad, A.; Halafawy, A.; Hammad, M.; Hassan, R.; Hassan, W.; Hatem, A.; Hussein, S.; Jalal, D.; Magdeldin, S.; Mansour, T.; Monuir, G.; Salah, H.; Samir, O.; Sayed, A.; Soliman, M.; Soliman, S.; shalaby, L.                                                                                                                                   |
|                                                                                                                                                |                          |                                                                                                                                                                      | Cathy Paulino; João Costa; João Sobral; Maria Costa; Ricardo Leite; Susana Ladeiro                                                                                                                                                                                                                                                                                                                                                                                 |
|                                                                                                                                                |                          |                                                                                                                                                                      | Alex Plocik; Becky Schilling; Birgitte Simen; David R. Hillyard; E. Susan Slechta; Erin L. Young; James McGann; Jeffrey B. Stevenson; Jim Griffin; Keith Robison; Kelly Oakeson; Malaika McKenzie-Bennett; Martha Pierson; Melanie A. Mallory; Michael T. Pyne; Michelle Spencer; Rebecca Littlefield; Salika M. Shakir; Tara Gallagher                                                                                                                            |
|                                                                                                                                                |                          |                                                                                                                                                                      | Adnan, N.; Ahmed; Akter, S.; Ali, T.; Azmda, N.; Chaity, M.; Haq; Jahan, N.; Jamiruddin; Jamiruddin, M.; Khandker; Khondoker; Liza; M.A.; M.F.; M.R.; M.U.; Marzan, M.; Mou; Nahar, S.; Oshhee, M.; S.M.; S.S.; Sharif, N.; Sharmin, S.; T.J.                                                                                                                                                                                                                      |
|                                                                                                                                                |                          |                                                                                                                                                                      | Alexander A Martinez; Claudia Gonzalez Sandra Lopez-Verges; Danilo Franco                                                                                                                                                                                                                                                                                                                                                                                          |
|                                                                                                                                                |                          |                                                                                                                                                                      | Abrego L; Castillo M; Chavarria O; Diaz Y; Franco D; Gondola Y; Lopez-Verguez S; Martinez Alexander A.; Moreno A; Moreno B; Pitti Y; Saenz L                                                                                                                                                                                                                                                                                                                       |
|                                                                                                                                                |                          |                                                                                                                                                                      | Arauz D; Castillo D; Castillo M; Chavarria O; Diaz Y; Franco D; Gaitan M; Gondola J; González C; Lopez-Verges S.; Martinez AA; Moreno A; Moreno B; Pitti Y; Saenz L                                                                                                                                                                                                                                                                                                |
|                                                                                                                                                |                          |                                                                                                                                                                      | Christina Maria Kravvari; Dimitrios Thanos; Emmanouil Athanasiadis; Ioannis Vatsellas; Katerina Zoi; Theodoris Loupis                                                                                                                                                                                                                                                                                                                                              |
|                                                                                                                                                |                          |                                                                                                                                                                      | Arash Iranzadeh; Bruna Galvao; Carolyn Williamson; Deelan Doolabh; Diana Hardie; Innocent Mudau; Kruger Marais; Lynn Tyers; Marvin Hsiao; Stephen Korsman                                                                                                                                                                                                                                                                                                          |
|                                                                                                                                                |                          |                                                                                                                                                                      | Arash Iranzadeh; Bruna Galvao; Carolyn Williamson; Deelan Doolabh; Diana Hardie; Innocent Mudau; Kruger Marais; Lynn Tyers; Marvin Hsiao; Stephen Korsman                                                                                                                                                                                                                                                                                                          |
|                                                                                                                                                |                          |                                                                                                                                                                      | Arash Iranzadeh; Bruna Galvao; Carolyn Williamson; Deelan Doolabh; Diana Hardie; Innocent Mudau; Kruger Marais; Lynn Tyers; Marvin Hsiao; Stephen Korsman                                                                                                                                                                                                                                                                                                          |
|                                                                                                                                                |                          |                                                                                                                                                                      | Ashish Koshy; Budoor Alqarni; Denghui Liu; Fang Chen; Hanif Khalak; Huanming Yang; Javier Quilez; Jian Wang; Junhua Li; Ke Liang; Long Lin; Mohammed Saifuddin Fasihuddin; Nan Qiao; Nawal Ahmed Mohamed Al Kaabi; Pauline Ogradzki; Pei Wu; Peng Xiao; Pengjuan Liu; Rong Liu; Sally Mahmoud; Siyang Liu; Stephen S. Francis; Tao Ma; Vinay Kusuma; Walid Abbas Zaher; Weibin Liu; Wenjun He; Xavier Anton; Xin Jin; Xin Meng; Xinyu Huang; Xun Xu; Zhaorong Yuan |
|                                                                                                                                                |                          |                                                                                                                                                                      | Alexandre Soulier; Christophe Rodriguez; Elisabeth Trawinski; Guillaume Gricourt; Jean-Michel Pawlotsky; Melissa N'Debi; Slim Fourati; Vanessa Demontant                                                                                                                                                                                                                                                                                                           |
|                                                                                                                                                |                          |                                                                                                                                                                      | Adam Moore; Akiko Iwasaki; Albert Ko; Alice Lu; Allison Nelson; Anderson Brito; Anne Wylie; Annie Watkins; Arnau Casanovas; Catherine Muenker; Chaney Kalinich; Chantal Vogels; Charlese Dela Cruz; Isabel Ott; Joseph Fauver; Maria Tokuyama; Mary Petrone; Nathan Grubaugh; Patrick Wong; Peiwen Lu; Richard Martinello; Saad Omer; Shelli Farhadian; Tara Alpert                                                                                                |
|                                                                                                                                                |                          |                                                                                                                                                                      | Adriana Castillo; Alberto Paniz-Mondolfi; Ana S. Gonzalez-Reiche; Angelica Rico; Anibal A. Teherán; Carolina Florez; Carolina Hernandez; David Martinez; Emilia Mia Sordillo; Esther C. Barros; Harm van Bakel; Jesús E. Jaimes; Juan David Ramirez; Laura Vega; Lisseth Pardo; Marina Muñoz; Martha L. Ospina; Matthew M. Hernandez; Nathalia Ballesteros; Sergio Castañeda; Sergio Gomez; Viviana Simon                                                          |
|                                                                                                                                                |                          |                                                                                                                                                                      | Alberto Paniz-Mondolfi; Camilo Correa-Cardenas; Carlos A. Rincón; Claudia P. Mendez; Elizabeth K. Marquez; Frank de los Santos Ortiz; Juan David Ramirez; Julie J. Perez; Luz H. Patiño; Magda C. Oliveros; Maria C. Duque; Marina Muñoz; Nathalia Ballesteros; Sergio Castañeda                                                                                                                                                                                   |
|                                                                                                                                                |                          |                                                                                                                                                                      | Bingfeng Liu; Fang Li; Fei Yu; Feng Huang; Fengyu Hu; Hui Zhang; Huimin Fan; Jun Liu; Junsong Zhang; Kai Deng; Mang Shi; Ruosun Ying; Ting Pan; Xu Zhang; Yiwen Zhang                                                                                                                                                                                                                                                                                              |
|                                                                                                                                                |                          |                                                                                                                                                                      | Anna Uehara; Clinton Paden; Haibin Wang; Jing Zhang; Krista Queen; Suxiang Tong; Yan Li; Ying Tao                                                                                                                                                                                                                                                                                                                                                                  |
|                                                                                                                                                |                          |                                                                                                                                                                      | Craig S. Richmond; Paraic A. Kenny                                                                                                                                                                                                                                                                                                                                                                                                                                 |
|                                                                                                                                                |                          |                                                                                                                                                                      | Andrey Komissarov; Anna Ivanova; Artem Fadeev; Daria Danilenko; Dmitry Bazhenov; Dmitry Lioznov; Elena Nabieva; Georgii Bazykin; Ksenia Safina; Kseniya Komissarova; Mikhail Bakaev                                                                                                                                                                                                                                                                                |
|                                                                                                                                                |                          |                                                                                                                                                                      | Andreas Berghthaler; Anna Schedl; Bekir Erguner; Benedikt Agerer; Christoph Bock; Jan Laine; Lukas Eandler; Maelle Le Moing; Martin Senekowitsch; Michael Schuster; Thomas Penz                                                                                                                                                                                                                                                                                    |
|                                                                                                                                                |                          |                                                                                                                                                                      | Adriana Godínez; Claudio Soto-Garita; Estela Cordero; Francisco Duarte; Hebleen Porras; Melany Calderón & Mariel López                                                                                                                                                                                                                                                                                                                                             |
|                                                                                                                                                |                          |                                                                                                                                                                      | Adriana Godínez; Claudio Soto-Garita; Estela Cordero; Francisco Duarte; Hebleen Porras; Melany Calderón & Cristian Pérez-Corrales                                                                                                                                                                                                                                                                                                                                  |
|                                                                                                                                                |                          |                                                                                                                                                                      | Adriana Godínez; Claudio Soto-Garita; Estela Cordero; Francisco Duarte; Hebleen Porras; Melany Calderón & Mariel López                                                                                                                                                                                                                                                                                                                                             |
|                                                                                                                                                |                          |                                                                                                                                                                      | Adriana Godínez; Claudio Soto-Garita; Estela Cordero; Francisco Duarte; Hebleen Porras; Melany Calderón & Mariel López                                                                                                                                                                                                                                                                                                                                             |

|                                                                                                                                                                                                                                                          |                                                                                                                                                                  |                                                                                                                                                                  |                                                                                                                                                                                                                                                                                                                                                                                                                                                                                                                                                                                                                                                                                                               |
|----------------------------------------------------------------------------------------------------------------------------------------------------------------------------------------------------------------------------------------------------------|------------------------------------------------------------------------------------------------------------------------------------------------------------------|------------------------------------------------------------------------------------------------------------------------------------------------------------------|---------------------------------------------------------------------------------------------------------------------------------------------------------------------------------------------------------------------------------------------------------------------------------------------------------------------------------------------------------------------------------------------------------------------------------------------------------------------------------------------------------------------------------------------------------------------------------------------------------------------------------------------------------------------------------------------------------------|
| EPI_ISL_445343                                                                                                                                                                                                                                           | HOSPITAL DR.HERNAN HENRIQUEZ ARAVENA                                                                                                                             | Instituto de Salud Publica de Chile                                                                                                                              | Alejandra Acevedo; Andrés E Castillo; Bárbara Parra; Carolina Tambley; Gabriel Leal; Jaime Lagos; Jorge Fernandez; Loredana Arata; Patricia Bustos; Paz Tapia; Rodrigo Fasce; Winston Andrade                                                                                                                                                                                                                                                                                                                                                                                                                                                                                                                 |
| EPI_ISL_1067592                                                                                                                                                                                                                                          | HOSPITAL GOLFITO MANUEL MORA VALVERDE                                                                                                                            | Incienza, Instituto Costarricense de Investigación y Enseñanza en Nutrición y Salud                                                                              | Adriana Godínez; Claudio Soto-Garita; Estela Cordero; Francisco Duarte; Hebleen Porras; Melany Calderón & Mariel López                                                                                                                                                                                                                                                                                                                                                                                                                                                                                                                                                                                        |
| EPI_ISL_914834                                                                                                                                                                                                                                           | HOSPITAL METROPOLITANO                                                                                                                                           | Incienza, Instituto Costarricense de Investigación y Enseñanza en Nutrición y Salud                                                                              | Adriana Godínez; Claudio Soto-Garita; Estela Cordero; Francisco Duarte; Hebleen Porras; Melany Calderón & Margarita Lee-Lui                                                                                                                                                                                                                                                                                                                                                                                                                                                                                                                                                                                   |
| EPI_ISL_914837, EPI_ISL_1067614                                                                                                                                                                                                                          | HOSPITAL MEXICO                                                                                                                                                  | Incienza, Instituto Costarricense de Investigación y Enseñanza en Nutrición y Salud                                                                              | Adriana Godínez; Caterina Guzmán; Claudio Soto-Garita; Estela Cordero; Francisco Duarte; Hebleen Porras; Melany Calderón; Melany Calderón & Teresita Somogyi; Nazareth Ruiz & Teresita Somogyi                                                                                                                                                                                                                                                                                                                                                                                                                                                                                                                |
| EPI_ISL_445288                                                                                                                                                                                                                                           | HOSPITAL REG.LAUTARO NAVARRO AVARIA                                                                                                                              | Instituto de Salud Publica de Chile                                                                                                                              | Alejandra Acevedo; Andrés E Castillo; Bárbara Parra; Carolina Tambley; Gabriel Leal; Jaime Lagos; Jorge Fernandez; Loredana Arata; Patricia Bustos; Paz Tapia; Rodrigo Fasce; Winston Andrade                                                                                                                                                                                                                                                                                                                                                                                                                                                                                                                 |
| EPI_ISL_1067604                                                                                                                                                                                                                                          | HOSPITAL SAN JUAN DE DIOS                                                                                                                                        | Incienza, Instituto Costarricense de Investigación y Enseñanza en Nutrición y Salud                                                                              | Adriana Godínez; Claudio Soto-Garita; Estela Cordero; Francisco Duarte; Hebleen Porras; Melany Calderón & Daniel Cascante-Serrano                                                                                                                                                                                                                                                                                                                                                                                                                                                                                                                                                                             |
| EPI_ISL_445349                                                                                                                                                                                                                                           | HOSPITAL SAN JUAN DE DIOS                                                                                                                                        | Instituto de Salud Publica de Chile                                                                                                                              | Alejandra Acevedo; Andrés E Castillo; Bárbara Parra; Carolina Tambley; Gabriel Leal; Jaime Lagos; Jorge Fernandez; Loredana Arata; Patricia Bustos; Paz Tapia; Rodrigo Fasce; Winston Andrade                                                                                                                                                                                                                                                                                                                                                                                                                                                                                                                 |
| EPI_ISL_794659, EPI_ISL_794660                                                                                                                                                                                                                           | HOSPITAL UNIVERSITARIO SAN IGNACIO                                                                                                                               | Instituto Nacional de Salud - Dirección de Investigación en Salud Pública                                                                                        | Carlos Franco-Muñoz; Diego A. Álvarez-Díaz; Diego Andrés Prada; Gerardo Santamaría; Jonathan Reales; Julian Naizaque; Katherine Laiton-Donato; Magdalena Wiesner; Marcela Mercado-Reyes; María T. Herrera; Martha Lucia Ospina Martinez; Mauricio Pacheco-Montealegre; Paola Muñoz-Laiton; Sheryl Corchuelo                                                                                                                                                                                                                                                                                                                                                                                                   |
| EPI_ISL_682265                                                                                                                                                                                                                                           | HOSPITAL UPALA                                                                                                                                                   | Incienza, Instituto Costarricense de Investigación y Enseñanza en Nutrición y Salud                                                                              | Adriana Godínez & Melany Calderon; Claudio Soto-Garita; Estela Cordero; Francisco Duarte; Hebleen Porras                                                                                                                                                                                                                                                                                                                                                                                                                                                                                                                                                                                                      |
| EPI_ISL_636976, EPI_ISL_636979                                                                                                                                                                                                                           | HP Pemba                                                                                                                                                         | KRISP, KZN Research Innovation and Sequencing Platform                                                                                                           | Giandhari J; Ismael N; Nadia Siteo; Nedio Mabunda; Paulo Arnaldo; Pillay S; Tegally H; Wilkinson E; de Oliveira T                                                                                                                                                                                                                                                                                                                                                                                                                                                                                                                                                                                             |
| EPI_ISL_412971                                                                                                                                                                                                                                           | HUS Diagnostikkakeskus, Hallinto                                                                                                                                 | Department of Virology Faculty of Medicine, Medicum University of Helsinki                                                                                       | Hannimari Kallio-Kokko; Olli Vapalahti; Suvi Kuivanen; Teemu Smura                                                                                                                                                                                                                                                                                                                                                                                                                                                                                                                                                                                                                                            |
| EPI_ISL_775335                                                                                                                                                                                                                                           | Haukeland University Hospital, Dept. of Microbiology                                                                                                             | Norwegian Institute of Public Health, Department of Virology                                                                                                     | Atiya R Ali; Hilde Elshaug; Hilde Vollen; Kamilla Heddeland Instefjord; Karoline Bragstad; Kathrine Stene-Johansen; Marie Paulsen Madsen; Olav Hungnes; Rasmus Riis Kopperud                                                                                                                                                                                                                                                                                                                                                                                                                                                                                                                                  |
| EPI_ISL_796012, EPI_ISL_796014, EPI_ISL_796023                                                                                                                                                                                                           | Hebei Provincial Center for Disease Control and Prevention, Shijiazhuang, Hebei Province; National Institute for Viral Disease Control and Prevention, China CDC | Hebei Provincial Center for Disease Control and Prevention, Shijiazhuang, Hebei Province; National Institute for Viral Disease Control and Prevention, China CDC | George F. Gao; Nankun Liu; Qi Li; Shunxiang Qi; Wenbo Xu; Xiang Zhao; Yang Song                                                                                                                                                                                                                                                                                                                                                                                                                                                                                                                                                                                                                               |
| EPI_ISL_1040680                                                                                                                                                                                                                                          | Heideveld Emergency Centre                                                                                                                                       | NHLS/UCT                                                                                                                                                         | Arash Iranzadeh; Bruna Galvao; Carolyn Williamson; Deelan Doolabh; Diana Hardie; Innocent Mudau; Kruger Marais; Lynn Tyers; Marvin Hsiao; Stephen Korsman                                                                                                                                                                                                                                                                                                                                                                                                                                                                                                                                                     |
| EPI_ISL_1088773, EPI_ISL_1088929, EPI_ISL_1089091, EPI_ISL_1089098, EPI_ISL_1089099, EPI_ISL_1089261                                                                                                                                                     | Helix / Illumina                                                                                                                                                 | Respiratory Viruses Branch, Division of Viral Diseases, Centers for Disease Control and Prevention                                                               | Alexandre Bolze; Ary Ascencio; Ben L. Rambo-Martin; Brad Sickler; Charlotte Rivera-Garcia; Christine Tran; Clinton R. Paden; Dakota Howard; David Becker; Dhvani Batra; Duncan MacCannell; Efrén Sandoval; Eileen de Feo; Elizabeth Cirulli; Eric Allen; Geraint Levan; James Lu; Jan Antico; Jason Nguyen; Jimmy Ramirez; Jingtao Liu; Kelly Schiabor Barrett; Kim Gietzen; Magnus Isaksson; Marc Laurent; Matthew Tolentino; Nicole L. Washington; Peter W. Cook; Phil Febbo; Ryan Cho; Shannon Wickline; Sherry Wang; Simon White; Summer Galloway; Suxiang Tong; Tyler Cassens; William Lee                                                                                                               |
| EPI_ISL_966728, EPI_ISL_966901, EPI_ISL_966962, EPI_ISL_967188, EPI_ISL_967842, EPI_ISL_1016571, EPI_ISL_1133843, EPI_ISL_1133926, EPI_ISL_1133991, EPI_ISL_1134241, EPI_ISL_1134244, EPI_ISL_1134364, EPI_ISL_1134479, EPI_ISL_1134834, EPI_ISL_1134837 | see above                                                                                                                                                        | Respiratory Viruses Branch, Division of Viral Diseases, Centers for Disease Control and Prevention                                                               | ; Alexandre Bolze; Ary Ascencio; Ben L. Rambo-Martin; Brad Sickler; Charlotte Rivera-Garcia; Christine Tran; Clinton R. Paden; Dakota Howard; David Becker; Dhvani Batra; Duncan MacCannell; Efrén Sandoval; Eileen de Feo; Elizabeth Cirulli; Eric Allen; Geraint Levan; James Lu; Jan Antico; Jason Nguyen; Jimmy Ramirez; Jingtao Liu; Kelly Schiabor Barrett; Kim Gietzen; Magnus Isaksson; Marc Laurent; Matthew Tolentino; Nicole L. Washington; Peter W. Cook; Phil Febbo; Ryan Cho; Shannon Wickline; Sherry Wang; Simon White; Summer Galloway; Suxiang Tong; Tyler Cassens; William Lee                                                                                                             |
| EPI_ISL_501233, EPI_ISL_501236                                                                                                                                                                                                                           | Hellenic Pasteur Institute, National Influenza Reference laboratory of Southern Greece & Unit of Bioinformatics and Applied Genomics                             | Hellenic Pasteur Institute, National Influenza Reference laboratory of Southern Greece & Unit of Bioinformatics and Applied Genomics                             | Andreas Mentis; Androniki Voulgari-Kokota; Antonios Kalliaropoulos; Aspasia Kontou; Athanasios Kossvyakis; Evangelidou Maria; Horefti Elina; Timokratris Karamitros; Vasiliki Pogka                                                                                                                                                                                                                                                                                                                                                                                                                                                                                                                           |
| EPI_ISL_906741, EPI_ISL_906752, EPI_ISL_1040939, EPI_ISL_1096159, EPI_ISL_1096176                                                                                                                                                                        | Hematology Laboratory, Section of Molecular Diagnostics, University Clinical Centre, Medical University of Gdansk                                                | Laboratory of Recombinant Vaccines                                                                                                                               | Adam Sodo; Aneta Szulc; Boguslaw Szewczyk; Ewa Milosz; Krystyna Bienkowska-Szewczyk; Krzysztof Lewandowski; Lukasz Rabalski; Maciej Grzybek; Maciej Kosinski; Marlena Robakowska                                                                                                                                                                                                                                                                                                                                                                                                                                                                                                                              |
| EPI_ISL_699880                                                                                                                                                                                                                                           | Hematopathology Laboratory, ACTREC, TMC                                                                                                                          | Hematopathology Laboratory, ACTREC, TMC                                                                                                                          | ACTREC; Hematopathology Laboratory                                                                                                                                                                                                                                                                                                                                                                                                                                                                                                                                                                                                                                                                            |
| EPI_ISL_1122457                                                                                                                                                                                                                                          | Hi-Precision Diagnostics                                                                                                                                         | Philippine Genome Center                                                                                                                                         | Alethea R. de Guzman; Anna Ong-Lim; Arianne A. Zamora; Asia Louisa U. Chong; Benedict A. Maralit; Candice Francheska B. Tambaoan; Carlo M. Lapid; Celia Carlos; Devon Ray Pacial; Edsel Maurice Salvaña; El King D. Morado; Eva Maria Cutiungco-de la Paz; Francis A. Tablizo; Irish Coleen A. Asin; Jaime C. Montoya; Jan Michael C. Yap; Jo-Hannah S. Llamas; John Q. Wong; Joshua Gregor A. Dizon; Juan Antonio R. Magalang; Karol Sophia Agape R. Padilla; Kenneth M. Kim; Kris P. Punayan; Marc Edsel C. Ayes; Marc Jerrone R. Castro; Maria Rosario Singh-Vergeire and Cynthia P. Saloma; Maria Sofia L. Yangzon; Marissa Alejandria; Razel Nikka M. Hao; Rianna Patricia S. Cruz; Sheila Mae M. Araiza |
| EPI_ISL_544987, EPI_ISL_845796                                                                                                                                                                                                                           | Histopath                                                                                                                                                        | NSW Health Pathology - Institute of Clinical Pathology and Medical Research; Westmead Hospital; University of Sydney                                             | CIDM-PH et al.                                                                                                                                                                                                                                                                                                                                                                                                                                                                                                                                                                                                                                                                                                |
| EPI_ISL_770024                                                                                                                                                                                                                                           | Hle - Asociacion Hogar De Ancianos Santiago Crespo Calvo                                                                                                         | Incienza, Instituto Costarricense de Investigación y Enseñanza en Nutrición y Salud                                                                              | Adriana Godínez; Claudio Soto-Garita; Estela Cordero; Francisco Duarte; Hebleen Porras; Melany Calderón & Mariel López                                                                                                                                                                                                                                                                                                                                                                                                                                                                                                                                                                                        |
| EPI_ISL_414527, EPI_ISL_760051, EPI_ISL_760053                                                                                                                                                                                                           | Hong Kong Department of Health                                                                                                                                   | School of Public Health, The University of Hong Kong                                                                                                             | Carrie Wan; Daisy Ng; Daniel Chu; Daniel K.W. Chu; Dominic N.C. Tsang; Gigi Liu; Haogao Gu; Leo L.M. Poon; Leo Poon; Malik Peiris; Pavithra Krishnan                                                                                                                                                                                                                                                                                                                                                                                                                                                                                                                                                          |
| EPI_ISL_1060455, EPI_ISL_1110413, EPI_ISL_1110464                                                                                                                                                                                                        | Hopital                                                                                                                                                          | National Reference Center for Viruses of Respiratory Infections, Institut Pasteur, Paris                                                                         | Angela Brisebarre; Camille Capel; Ducancelle Alexandra; Etienne Simon-Lorière; Forgeaud Jacques; Marion Barbet; Maud Vanpeene; Méline Bizard; Pilorge LéA; Sylvie Behilli; Sylvie van der Werf; Vincent Enouf                                                                                                                                                                                                                                                                                                                                                                                                                                                                                                 |
| EPI_ISL_832173, EPI_ISL_890891                                                                                                                                                                                                                           | Hospital                                                                                                                                                         | National Reference Center for Viruses of Respiratory Infections, Institut Pasteur, Paris                                                                         | Angela Brisebarre; Camille Capel; Etienne Simon-Lorière; Marion Barbet; Maud Vanpeene; Méline Bizard; Patricia Stoessel-Thouvenin; Sylvie Behilli; Sylvie van der Werf; Vincent Enouf                                                                                                                                                                                                                                                                                                                                                                                                                                                                                                                         |
| EPI_ISL_906078                                                                                                                                                                                                                                           | Hospital Carlos Chagas                                                                                                                                           | Instituto Adolfo Lutz, Interdisciplinary Procedures Center, Strategic Laboratory                                                                                 | Claudia Regina Gonçalves; Claudio Tavares Sacchi; Erica Valessa Ramos Gomes; Karoline Rodrigues Campos                                                                                                                                                                                                                                                                                                                                                                                                                                                                                                                                                                                                        |
| EPI_ISL_512654                                                                                                                                                                                                                                           | Hospital Dr. Rafael A. Calderon Guardia [San Jose/San Jose]                                                                                                      | Incienza, Instituto Costarricense de Investigación y Enseñanza en Nutrición y Salud                                                                              | Adriana Godínez & Melany Calderon; Claudio Soto-Garita; Estela Cordero; Francisco Duarte; Hebleen Porras                                                                                                                                                                                                                                                                                                                                                                                                                                                                                                                                                                                                      |
| EPI_ISL_770028                                                                                                                                                                                                                                           | Hospital Dr. Raul Blanco Cervantes                                                                                                                               | Incienza, Instituto Costarricense de Investigación y Enseñanza en Nutrición y Salud                                                                              | Adriana Godínez; Claudio Soto-Garita; Estela Cordero; Francisco Duarte; Hebleen Porras; Melany Calderón & Mariel López                                                                                                                                                                                                                                                                                                                                                                                                                                                                                                                                                                                        |
| EPI_ISL_424731                                                                                                                                                                                                                                           | Hospital General Regional No.66, Ciudad Juárez, Chihuahua.                                                                                                       | Laboratorio Central de Epidemiología-DLVIE / Laboratorio de Secuenciación-Centro de Instrumentos. Instituto Mexicano del Seguro Social                           | Araiza-Rodríguez A; Arias C; Barrera-Badillo G; Becerril-Vargas E; Borja-Aburto VH.; Boukadida C; Garcés-Ayala F; García-Andrade LA; Gaytán-Cervantes FJ; González-Bonilla CR; González-Torres C; Grajales-Muñiz C; Grande R; Hernández-Rivas L; Ibarra-González V; Isa P; Ledesma-Barrientos F; López-Martínez I; Martínez-Orozco JA; Mendieta-Condado E; Muñoz-Medina JE; Mujica-Sánchez M; Pulido F. López S; Ramos-Cervantes P; Ramírez-González JE; Ruiz-Palacios GM; Sánchez A; Taboada B; Vázquez G; Vázquez-Pérez JA; de León-Garduño AP; Ávila-Ríos S                                                                                                                                                |
| EPI_ISL_654216, EPI_ISL_779994, EPI_ISL_814040, EPI_ISL_853005                                                                                                                                                                                           | Hospital General Universitario Gregorio Marañón                                                                                                                  | SeqCOVID-SPAIN consortium/IBV(CSIC)                                                                                                                              | Darío García de Viedma; Jon Sicilia; Julia Suárez; Laura Pérez-Lago; Marta Herranz; Patricia Muñoz and SeqCOVID-SPAIN consortium; Pedro J Sola-Campoy; Pilar Catalán; Sergio Buenestado-Serrano; Víctor Manuel de la Cueva                                                                                                                                                                                                                                                                                                                                                                                                                                                                                    |

|                                                                                                                                                                                                                                                                                                  |                                                                                    |                                                                                                                                                                                                                                                   |                                                                                                                                                                                                                                                                                                                                                                                                                                                                                                                                                   |
|--------------------------------------------------------------------------------------------------------------------------------------------------------------------------------------------------------------------------------------------------------------------------------------------------|------------------------------------------------------------------------------------|---------------------------------------------------------------------------------------------------------------------------------------------------------------------------------------------------------------------------------------------------|---------------------------------------------------------------------------------------------------------------------------------------------------------------------------------------------------------------------------------------------------------------------------------------------------------------------------------------------------------------------------------------------------------------------------------------------------------------------------------------------------------------------------------------------------|
| EPI_ISL_943967                                                                                                                                                                                                                                                                                   | Hospital Geral de Sao Paulo                                                        | Instituto Adolfo Lutz, Interdisciplinary Procedures Center, Strategic Laboratory                                                                                                                                                                  | Claudia Regina Gonçalves; Claudio Tavares Sacchi; Erica Valessa Ramos Gomes; Karoline Rodrigues Campos                                                                                                                                                                                                                                                                                                                                                                                                                                            |
| EPI_ISL_412964                                                                                                                                                                                                                                                                                   | Hospital Israelita Albert Einstein                                                 | Instituto Adolfo Lutz Interdisciplinary Procedures Center Strategic Laboratory                                                                                                                                                                    | Andrew Rambaut; Claudia Regina Gonçalves; Claudio Tavares Sacchi; Daniela Bernardes Borges da Silva; Ester Cerdeira Sabino; Flávia Cristina da Silva Sales; Ingra Morales Claro; Jaqueline Goes de Jesus; Joshua Quick; Maria do Carmo; Nicholas James Loman; Nuno Rodrigues Faria; Sampaio Tavares Timenetsky                                                                                                                                                                                                                                    |
| EPI_ISL_1120614                                                                                                                                                                                                                                                                                  | Hospital Margarita Maza de Juarez                                                  | CIAD LDM-LGM                                                                                                                                                                                                                                      | Bruno Gome-Gil; Julissa Enciso-Ibarra                                                                                                                                                                                                                                                                                                                                                                                                                                                                                                             |
| EPI_ISL_539496                                                                                                                                                                                                                                                                                   | Hospital Nostra Senyora de Meritxell                                               | Instituto de Salud Carlos III                                                                                                                                                                                                                     | A. Monzón; F. Casas; F. Fernández; I. I. Jiménez; Iglesias-Caballero; M. Camarero; M. Cuesta; M. González-Esguevillas; M. Molinero Calamita; M. Zaballos; P. Jiménez; S. Juliá; S. Pozo; S. Varona                                                                                                                                                                                                                                                                                                                                                |
| EPI_ISL_471269, EPI_ISL_471271                                                                                                                                                                                                                                                                   | Hospital Oncológico Solca Núcleo de Quito                                          | Institute of Microbiology, Universidad San Francisco de Quito                                                                                                                                                                                     | Belén Prado-Vivar; Bernardo Gutiérrez; Gabriel Trueba; Juan José Guadalupe; Marcos Di Stefano; Michelle Grunauer; Patricio Rojas-Silva; Paúl Cárdenas; Sully Márquez; Verónica Barragán                                                                                                                                                                                                                                                                                                                                                           |
| EPI_ISL_414016                                                                                                                                                                                                                                                                                   | Hospital São Joaquim Beneficencia Portuguesa                                       | Instituto Adolfo Lutz, Interdisciplinary Procedures Center, Strategic Laboratory                                                                                                                                                                  | Audrey Cilli; Carlos Henrique Camargo; Claudia Regina Gonçalves; Claudio Tavares Sacchi; Daniela Bernardes Borges da Silva; Ester Cerdeira Sabino; Maria do Carmo Sampaio Tavares Timenetsky; Terezinha Maria de Paiva                                                                                                                                                                                                                                                                                                                            |
| EPI_ISL_824414, EPI_ISL_824435, EPI_ISL_825326, EPI_ISL_1080816                                                                                                                                                                                                                                  | Hospital Universitari Vall d'Hebron - Vall d'Hebron Institut de Recerca            | Hospital Universitari Vall d'Hebron - Vall d'Hebron Institut de Recerca                                                                                                                                                                           | Andrés Antón; Ariadna Rando; Carla Castillo; Cristina Andrés; Damir Garcia-Cehic; Josep F Abril; Josep Quer; Juliana Esperalba; Maria Carmen Martin; Maria Gema Codina; Maria Piñana; Tomàs Pumarola                                                                                                                                                                                                                                                                                                                                              |
| EPI_ISL_1017707, EPI_ISL_1017708, EPI_ISL_1017710                                                                                                                                                                                                                                                | Hospital Universitario Hernando Moncaleano Perdomo                                 | Instituto Nacional de Salud- Dirección de Investigación en Salud Pública                                                                                                                                                                          | Carlos Franco-Muñoz; Diego A. Álvarez-Díaz; Diego Andrés Prada; Gerardo Santamaría; Hector Alejandro Ruiz-Moreno; Jhonnatan Reales-González; Julian Naizaque; Katherine Laiton-Donato; Magdalena Wiesner; Marcela Mercado-Reyes; Maria T. Herrera-Sepúlveda; Martha Lucia Ospina Martinez; Sheryll Corchuelo                                                                                                                                                                                                                                      |
| EPI_ISL_693535                                                                                                                                                                                                                                                                                   | Hospital Vila Franca de Xira                                                       | Instituto Nacional de Saude (INSA)                                                                                                                                                                                                                | Borges et al                                                                                                                                                                                                                                                                                                                                                                                                                                                                                                                                      |
| EPI_ISL_836143                                                                                                                                                                                                                                                                                   | Hospital de Campanha COVID-19 de Mairipora                                         | Instituto Adolfo Lutz, Interdisciplinary Procedures Center, Strategic Laboratory                                                                                                                                                                  | Claudia Regina Gonçalves; Claudio Tavares Sacchi; Erica Valessa Ramos Gomes; Karoline Rodrigues Campos                                                                                                                                                                                                                                                                                                                                                                                                                                            |
| EPI_ISL_1110261                                                                                                                                                                                                                                                                                  | Hospital de Sagunto                                                                | SeqCOVID-SPAIN consortium/IBV(CSIC)                                                                                                                                                                                                               | Noelia Lozano Rodríguez; Sandra Moreno and SeqCOVID-SPAIN consortium                                                                                                                                                                                                                                                                                                                                                                                                                                                                              |
| EPI_ISL_861657                                                                                                                                                                                                                                                                                   | Hospital e Maternidade Sino Brasileiro                                             | Instituto Adolfo Lutz, Interdisciplinary Procedures Center, Strategic Laboratory                                                                                                                                                                  | Claudia Regina Gonçalves; Claudio Tavares Sacchi; Erica Valessa Ramos Gomes; Karoline Rodrigues Campos                                                                                                                                                                                                                                                                                                                                                                                                                                            |
| EPI_ISL_1084613                                                                                                                                                                                                                                                                                  | Hospital for Infectious Diseases, Molecular Diagnostics Laboratory, Warsaw, Poland | 63. Laboratory of Recombinant Vaccines, Intercollegiate Faculty of Biotechnology University of Gdansk and Medical University of Gdansk, 2. ViroGenetics - BSL3 Laboratory of Virology, Maopolska Centre of Biotechnology, Jagiellonian University | Andrzej Horban; Aneta Kopacz; Krystyna Bienkowska-Szewczyk; Krzysztof Pyrc; Lukasz Rabalski; Maciej Kosinski; Natalia Mazur-Panasiuk; Piotr Zabek; Tomasz Dyda                                                                                                                                                                                                                                                                                                                                                                                    |
| EPI_ISL_549167                                                                                                                                                                                                                                                                                   | Hospital of Southern Norway - Kristiansand, Department of Medical Microbiology     | Norwegian Institute of Public Health, Department of Virology                                                                                                                                                                                      | Hilde Elshaug; Hilde Synnøve Vollan; Kamilla Heddeland Instefjord; Karoline Bragstad; Kathrine Stene-Johansen; Olav Hungnes; Rasmus Riis Kopperud                                                                                                                                                                                                                                                                                                                                                                                                 |
| EPI_ISL_545099, EPI_ISL_547201, EPI_ISL_785931, EPI_ISL_785968, EPI_ISL_788246, EPI_ISL_1075865, EPI_ISL_1077072                                                                                                                                                                                 | see above                                                                          | Houston Methodist Hospital                                                                                                                                                                                                                        | Chia-Wei Chou; Concepcion C. Cantu; Daniel Boutz; David W. Bernard; Ghazaleh Eskandari; Heather Hendrickson; Hoang A. T. Nguyen; Hung-Che Kuo; Ilya J. Finkelstein; J. Hunter Long; James J. Davis; Jason S. McLellan; Jessica Cambric; Jimmy Gollihar; Jule Goike; Karmyab Javanmardi; Kristina Reppond; Layne Pruitt; Madison N. Shyer; Marcus Nguyen; Matthew Ojeda Saavedra; Maulik Shukla; Muthiah Kumaraswami; Paul A. Christensen; Prasanti Yerramilli; Randall J. Olsen; Robert Olson; S. Wesley Long; Sishir Subedi; and James M. Musser |
| EPI_ISL_445088                                                                                                                                                                                                                                                                                   | Human Genetic Research Center, Kawsar Biotech Company                              | Human Genetic Research Center, Kawsar Biotech Company                                                                                                                                                                                             | Abbasalipour Bashash, M.; Jadalaha; Keshvar, Y.; Khosravi; M. and Yazdani, R.; M.A.; Sabeghi, S.; Zeinali, S.                                                                                                                                                                                                                                                                                                                                                                                                                                     |
| EPI_ISL_526223, EPI_ISL_526225, EPI_ISL_1041195, EPI_ISL_1041201, EPI_ISL_1041205, EPI_ISL_1041206, EPI_ISL_1041209, EPI_ISL_1041210, EPI_ISL_1041212                                                                                                                                            | see above                                                                          | Hungarian Defence Forces Military Medical Centre                                                                                                                                                                                                  | Balázs Somogyi; Bálint Eszenyi; Csaba Pereszlényi; Endre Gábor Tóth; Ferenc Jakab; Gábor Kemenesi; Ágnes Balázs-Nagy                                                                                                                                                                                                                                                                                                                                                                                                                              |
| EPI_ISL_710541                                                                                                                                                                                                                                                                                   | Hôpital Fattouma-Bourguiba de Monastir                                             | Laboratoire des Procédés de Criblage Moléculaire et Cellulaire-Centre de Biotechnologie de Sfax                                                                                                                                                   | A. and Masmoudi, S.; Abdelmoulah, F.; Abid, N.; Ajili, F.; Aouni, M.; Ben Ayed, I.; Bensaïd, M.; Chtourou, A.; Elargoubi, A.; Fki-berrajah, L.; Gaaloul, I.; Gargouri, S.; Hammami, A.; Kamoun, S.; Karray Hakim, H.; Kharat, N.; Mastouri, M.; Mhalla, S.; Nabl, A.; Rebai; Smeti, I.; Souissi, A.; Stambouli, N.; Turki, M.                                                                                                                                                                                                                     |
| EPI_ISL_961573, EPI_ISL_961574, EPI_ISL_961618, EPI_ISL_961621, EPI_ISL_961642, EPI_ISL_961667                                                                                                                                                                                                   | Hôpital Georges L. Dumont                                                          | National Microbiology Laboratory (NML)                                                                                                                                                                                                            | Anna Majer; Anneliese Landgraff; CanCOGeN's metadata curation team; Darian Hole; Elsie Grudeski; Gary Van Domselaar; Grace Seo; Guillaume Desnoyers; Jennifer Tanner; Kirsten Biggar; Madison Chapel; Madison Graham; Natalie Knox; Nathalie Bastien; Philip Mabon; Public Health Agency of Canada CanCOGeN team; Rhiannon Huzarewicz; Richard Garceau; Russell Mandes; Shari Tyson; Timothy Booth; Yan Li                                                                                                                                        |
| EPI_ISL_912847, EPI_ISL_1085398, EPI_ISL_1088554                                                                                                                                                                                                                                                 | Hôpital Henri Mondor                                                               | Department of Virology, Henri Mondor University Hospital, Assistance Publique Hôpitaux de Paris, Université Paris-Est Créteil, INSERM U955                                                                                                        | Alexandre Soulier; Christophe Rodriguez; Elisabeth Trawinski; Guillaume Gricourt; Jean-Michel Pawlotsky; Melissa N'Debi; Slim Fourati; Vanessa Demontant                                                                                                                                                                                                                                                                                                                                                                                          |
| EPI_ISL_1085855                                                                                                                                                                                                                                                                                  | Hôpital Robert- Debré                                                              | Department of Virology, Henri Mondor University Hospital, Assistance Publique Hôpitaux de Paris, Université Paris-Est Créteil, INSERM U955                                                                                                        | Alexandre Soulier; Christophe Rodriguez; Elisabeth Trawinski; Guillaume Gricourt; Jean-Michel Pawlotsky; Melissa N'Debi; Slim Fourati; Vanessa Demontant                                                                                                                                                                                                                                                                                                                                                                                          |
| EPI_ISL_653782, EPI_ISL_653810, EPI_ISL_653812                                                                                                                                                                                                                                                   | I.R.C.C.S. "S. De Bellis" - Ente Ospedaliero                                       | Istituto Zooprofilattico Sperimentale della Puglia e della Basilicata                                                                                                                                                                             | Bianco A.; Capozzi L.; Cipolletta D.; Del Sambio L.; Galante D.; Lippolis A.; Manzulli V.; Notarnicola M.; Pace L.; Parisi A.; Rondinone V.                                                                                                                                                                                                                                                                                                                                                                                                       |
| EPI_ISL_751742                                                                                                                                                                                                                                                                                   | IA State Hygienic Laboratory                                                       | Genomics and Discovery, Respiratory Viruses Branch, Division of Viral Diseases, Centers for Disease Control and Prevention                                                                                                                        | Anna Montmayeur; Anna Uehara; Clinton R. Paden; Haibin Wang; Jing Zhang; Justin Lee; Krista Queen; Mili Sheth; Peter W. Cook; Rachel Marine; Suxiang Tong; Yan Li; Ying Tao                                                                                                                                                                                                                                                                                                                                                                       |
| EPI_ISL_424895                                                                                                                                                                                                                                                                                   | IA State Hygienic Laboratory                                                       | Pathogen Discovery, Respiratory Viruses Branch, Division of Viral Diseases, Centers for Disease Control and Prevention                                                                                                                            | Alison S. Laufer Halpin; Anna Uehara; Christopher A. Elkins; Clinton R. Paden; Haibin Wang; Jing Zhang; Krista Queen; Mary S. Keckler; Suxiang Tong; Yan Li; Ying Tao                                                                                                                                                                                                                                                                                                                                                                             |
| EPI_ISL_1094706                                                                                                                                                                                                                                                                                  | IA State Hygienic Laboratory                                                       | Respiratory Viruses Branch, Division of Viral Diseases, Centers for Disease Control and Prevention                                                                                                                                                | Anna Montmayeur; Anna Uehara; Ben L. Rambo-Martin; Clinton R. Paden; Dhvani Batra; Haibin Wang; Jasmine Padilla; Jing Zhang; Justin Lee; Krista Queen; Lori Rowe; Mark Burroughs; Mili Sheth; Peter W. Cook; Rachel Marine; Sarah Nobles; Suxiang Tong; Yan Li; Ying Tao                                                                                                                                                                                                                                                                          |
| EPI_ISL_1078981, EPI_ISL_1078984, EPI_ISL_1078987, EPI_ISL_1078997, EPI_ISL_1078999, EPI_ISL_1079006, EPI_ISL_1079007, EPI_ISL_1079159, EPI_ISL_1079161, EPI_ISL_1079163, EPI_ISL_1079165, EPI_ISL_1086036, EPI_ISL_1086051, EPI_ISL_1086052, EPI_ISL_1086053, EPI_ISL_1086054, EPI_ISL_1086055, | see above                                                                          | IAL Regional de Bauru                                                                                                                                                                                                                             | Caio Vinicius Dias Lopes; Claudia Regina Gonçalves; Claudio Tavares Sacchi; Erica Valessa Ramos Gomes; Karoline Rodrigues Campos                                                                                                                                                                                                                                                                                                                                                                                                                  |
| EPI_ISL_984257                                                                                                                                                                                                                                                                                   | IAL Regional de Marilia                                                            | Instituto Adolfo Lutz, Interdisciplinary Procedures Center, Strategic Laboratory                                                                                                                                                                  | Claudia Regina Gonçalves; Claudio Tavares Sacchi; Erica Valessa Ramos Gomes; Karoline Rodrigues Campos                                                                                                                                                                                                                                                                                                                                                                                                                                            |
| EPI_ISL_1123375                                                                                                                                                                                                                                                                                  | IAL Regional de Santos                                                             | Instituto Adolfo Lutz, Interdisciplinary Procedures Center, Strategic Laboratory                                                                                                                                                                  | Caio Vinicius Dias Lopes; Claudia Regina Gonçalves; Claudio Tavares Sacchi; Erica Valessa Ramos Gomes; Karoline Rodrigues Campos                                                                                                                                                                                                                                                                                                                                                                                                                  |
| EPI_ISL_1091779, EPI_ISL_1091780                                                                                                                                                                                                                                                                 | ICMT                                                                               | Universidad Nacional de Colombia - Laboratorio Genómico One Health                                                                                                                                                                                | Andres F. Cardona-Rios; Carlos Franco-Muñoz; Daniel O. Maldonado-Perez; Diego A. Álvarez-Díaz; Idabely Betancur Ortiz; Jorge E. Osorio; Juan P. Hernandez-Ortiz; Karl A. Ciudodieris; Laura Silvana Perez; Marcela Mercado-Reyes; Sandra Ines Cano                                                                                                                                                                                                                                                                                                |
| EPI_ISL_751612, EPI_ISL_751748                                                                                                                                                                                                                                                                   | ID Bureau of Laboratories                                                          | Genomics and Discovery, Respiratory Viruses Branch,                                                                                                                                                                                               | Anna Montmayeur; Anna Uehara; Clinton R. Paden; Haibin Wang; Jing Zhang; Justin Lee; Krista Queen; Mili Sheth; Peter W. Cook; Rachel Marine;                                                                                                                                                                                                                                                                                                                                                                                                      |

|                                                                                                                                                                                                                                                                                                                                                                                                                                                         |                                                                                     |                                                                                                                                                                                                                                                                                                                 |                                                                                                                                                                                                                                                                                                                                                                                                                                                                                                                                       |
|---------------------------------------------------------------------------------------------------------------------------------------------------------------------------------------------------------------------------------------------------------------------------------------------------------------------------------------------------------------------------------------------------------------------------------------------------------|-------------------------------------------------------------------------------------|-----------------------------------------------------------------------------------------------------------------------------------------------------------------------------------------------------------------------------------------------------------------------------------------------------------------|---------------------------------------------------------------------------------------------------------------------------------------------------------------------------------------------------------------------------------------------------------------------------------------------------------------------------------------------------------------------------------------------------------------------------------------------------------------------------------------------------------------------------------------|
|                                                                                                                                                                                                                                                                                                                                                                                                                                                         |                                                                                     | Division of Viral Diseases, Centers for Disease Control and Prevention                                                                                                                                                                                                                                          | Suxiang Tong; Yan Li; Ying Tao                                                                                                                                                                                                                                                                                                                                                                                                                                                                                                        |
| EPI_ISL_648211                                                                                                                                                                                                                                                                                                                                                                                                                                          | INBIRS-UBA                                                                          | Laboratorio Mixto de Biotecnología Acuática (LMBA)                                                                                                                                                                                                                                                              | Adriana Giri; Agustina Cerri; Ana Cavatorta; Ana Paletta; Diego Chouhy; Elisa Bolatti; Elizabeth Tapia; Federico Remes Lenicov; Flavio Spetale; Gastón Viarengo; Ignacio García Labari; Javier Murillo; Joaquín Ezpeleta; Julian Acosta; Laura Angelone; Leandro Ciappina; María Re; Pablo Casal; Pilar Bulacio; Silvana Spinelli; Silvia Arranz; Sofía Lavista Llanos; Vanina Villanova; Victoria Posner                                                                                                                             |
| EPI_ISL_1109633                                                                                                                                                                                                                                                                                                                                                                                                                                         | INNO Diagnostics Reference Laboratory                                               | RCMI-Center for Research Resources, Ponce Research Institute                                                                                                                                                                                                                                                    | Andrea Arias-García; Raphael Sánchez-Torres; Vanessa Rivera-Amill                                                                                                                                                                                                                                                                                                                                                                                                                                                                     |
| EPI_ISL_806544                                                                                                                                                                                                                                                                                                                                                                                                                                          | INSPI Instituto Nacional de Investigación en Salud Pública                          | Av. Julián Coronel 905 entre Esmeraldas y José Mascote Av. Juan Tanca Marengo No. 100 y Av. de las Américas                                                                                                                                                                                                     | Alberto Orlando.; Alfredo Bruno; Andrés Carrazzo; Doménica de Mora; Leandro Patiño; Manuel González; Maritza Olmedo; Mary Regato; Melissa Zambrano; Orson Mestanza                                                                                                                                                                                                                                                                                                                                                                    |
| EPI_ISL_826798, EPI_ISL_826804, EPI_ISL_826814, EPI_ISL_826818, EPI_ISL_826822, EPI_ISL_826825, EPI_ISL_826836, EPI_ISL_831020                                                                                                                                                                                                                                                                                                                          | see above                                                                           | INSPI-CRN DE INFLUENZA Y OTROS VIRUS RESPIRATORIOS                                                                                                                                                                                                                                                              | Instituto de Salud Publica de Chile                                                                                                                                                                                                                                                                                                                                                                                                                                                                                                   |
| EPI_ISL_940769, EPI_ISL_940773, EPI_ISL_940775, EPI_ISL_940781, EPI_ISL_940821                                                                                                                                                                                                                                                                                                                                                                          | INSPI-CRN de Influenza y otros virus respiratorios                                  | INSPI-Centro de Investigación Multidisciplinaria de la DTIDI                                                                                                                                                                                                                                                    | Alberto Orlando; Alberto Orlando.; Alfredo Bruno; Andrés Carrazzo-Montalvo; Doménica de Mora; Leandro Patiño; Manuel González; Maritza Olmedo; Mary Regato-Arrata; Melissa Zambrano; Orson Mestanza                                                                                                                                                                                                                                                                                                                                   |
| EPI_ISL_848453, EPI_ISL_962075                                                                                                                                                                                                                                                                                                                                                                                                                          | Illinois Department of Public Health                                                | Gagnon Lab, Southern Illinois University                                                                                                                                                                                                                                                                        | Keith Gagnon                                                                                                                                                                                                                                                                                                                                                                                                                                                                                                                          |
| EPI_ISL_1063817, EPI_ISL_1063818, EPI_ISL_1063875, EPI_ISL_1063879, EPI_ISL_1063886, EPI_ISL_1063889, EPI_ISL_1063896                                                                                                                                                                                                                                                                                                                                   | see above                                                                           | Immunogenomics lab, Institute of Life Sciences, Bhubaneswar                                                                                                                                                                                                                                                     | Immunogenomics lab, Institute of Life Sciences, Bhubaneswar                                                                                                                                                                                                                                                                                                                                                                                                                                                                           |
| EPI_ISL_1018077, EPI_ISL_1018088, EPI_ISL_1018089, EPI_ISL_1018090, EPI_ISL_1018091, EPI_ISL_1018092, EPI_ISL_1018093, EPI_ISL_1018094, EPI_ISL_1018095, EPI_ISL_1018096, EPI_ISL_1018097, EPI_ISL_1018098, EPI_ISL_1018099, EPI_ISL_1018100, EPI_ISL_1018101                                                                                                                                                                                           | see above                                                                           | Immunology, Noguchi Memorial Institute for Medical Research                                                                                                                                                                                                                                                     | Immunology, Noguchi Memorial Institute for Medical Research                                                                                                                                                                                                                                                                                                                                                                                                                                                                           |
| EPI_ISL_476702, EPI_ISL_476704                                                                                                                                                                                                                                                                                                                                                                                                                          | Incubadora Venezolana de Ciencia, Venezuela                                         | Incubadora Venezolana de Ciencia, Venezuela / Instituto Nacional de Salud, Bogotá, Colombia / Grupo de Investigaciones Microbiológicas-UR (GIMUR), Departamento de Biología, Facultad de Ciencias Naturales, Universidad del Rosario, Bogotá, Colombia / Icahn School of Medicine at Mount Sinai, New York, USA | Alberto Paniz-Mondolfi; Ana S. Gonzalez-Reiche; Angelica Rico; Anibal A. Teherán; Carolina Flegado; Carolina Hernández; Emilia Mia Sordillo; Esther C. Barros; Harm van Bakel; Jesús E. Jaimes; Juan David Ramírez; Lisseth Pardo; Lourdes Delgado; Luis Perez-Garcia; Marina Muñoz; Matthew M. Hernandez; Sergio Gomez; Viviana Simon                                                                                                                                                                                                |
| EPI_ISL_413522                                                                                                                                                                                                                                                                                                                                                                                                                                          | Indian Council of Medical Research - National Institute of Virology                 | National Influenza Center, Indian Council of Medical Research - National Institute of Virology                                                                                                                                                                                                                  | Choudhary ML; Potdar V; Shete-Aich A; Yadav PD                                                                                                                                                                                                                                                                                                                                                                                                                                                                                        |
| EPI_ISL_413523                                                                                                                                                                                                                                                                                                                                                                                                                                          | Indian Council of Medical Research-National Institute of Virology                   | National Influenza Center, Indian Council of Medical Research-National Institute of Virology                                                                                                                                                                                                                    | Choudhary ML; Potdar V; Shete-Aich A; Yadav PD                                                                                                                                                                                                                                                                                                                                                                                                                                                                                        |
| EPI_ISL_969397                                                                                                                                                                                                                                                                                                                                                                                                                                          | Indian Council of Medical Research-National Institute of Virology, Pune             | Indian Council of Medical Research-National Institute of Virology, Maximum Containment Laboratory                                                                                                                                                                                                               | Abhinendra Kumar; Anita Shete-Aich; Dimpal A. Nyayanit; Pragya D. Yadav; Savita Patil; Triparna D. Majumdar                                                                                                                                                                                                                                                                                                                                                                                                                           |
| EPI_ISL_962556                                                                                                                                                                                                                                                                                                                                                                                                                                          | Infectious Disease Control and Prevention Institute                                 | Infectious Disease Control and Prevention Institute                                                                                                                                                                                                                                                             | Bo Pang; Jianxing Wang; Julong Wu; Mingxiao Yao; Ti Liu; Xiaolin Jiang; Yan Li; Yujie He; Yuwei Zhang; Zengqiang Kou                                                                                                                                                                                                                                                                                                                                                                                                                  |
| EPI_ISL_884318, EPI_ISL_884319, EPI_ISL_884354, EPI_ISL_884398                                                                                                                                                                                                                                                                                                                                                                                          | Infectious Diseases, Quest Diagnostics                                              | Infectious Diseases, Quest Diagnostics                                                                                                                                                                                                                                                                          | Anderson, B.; Bernstein; D.F.; Gerasimova, A.; Hua, M.; K.E.; Kagan; L.E.; Lacbawan, F.; Liu, Y.; Livingston; Owen, R.; R.M.; Rosenthal; S.H.; Shalhout                                                                                                                                                                                                                                                                                                                                                                               |
| EPI_ISL_496361, EPI_ISL_496373                                                                                                                                                                                                                                                                                                                                                                                                                          | Infectolab                                                                          | Andersen lab at Scripps Research                                                                                                                                                                                                                                                                                | Carlos A. Cota Haros; Octavio Renteria Pacheco; SEARCH Alliance San Diego with Samuel Navarro Alvarez                                                                                                                                                                                                                                                                                                                                                                                                                                 |
| EPI_ISL_708039                                                                                                                                                                                                                                                                                                                                                                                                                                          | Innlandet Hospital Trust, Division Lillehammer, Department for Medical Microbiology | Norwegian Institute of Public Health, Department of Virology                                                                                                                                                                                                                                                    | Hilde Elshaug; Hilde Vollan; Kamilla Heddeland Instefjord; Karoline Bragstad; Kathrine Stene-Johansen; Marie Paulsen Madsen; Olav Hungnes; Rasmus Riis Kopperud                                                                                                                                                                                                                                                                                                                                                                       |
| EPI_ISL_418206, EPI_ISL_418208, EPI_ISL_418214, EPI_ISL_418216, EPI_ISL_420079, EPI_ISL_476491, EPI_ISL_481238                                                                                                                                                                                                                                                                                                                                          | see above                                                                           | Institut Pasteur Dakar                                                                                                                                                                                                                                                                                          | Institut Pasteur de Dakar                                                                                                                                                                                                                                                                                                                                                                                                                                                                                                             |
| EPI_ISL_498238, EPI_ISL_498239, EPI_ISL_498243                                                                                                                                                                                                                                                                                                                                                                                                          | Institut Pasteur de Dakar                                                           | Institut Pasteur de Dakar                                                                                                                                                                                                                                                                                       | Amadou Alpha Sall.; Mamadou Diop; Mamadou Malado Jallow; Marie Henriette Dior Ndione; Moussa Moise Diagne; Ndongo Dia; Ousmane Faye; Safietou Sanke                                                                                                                                                                                                                                                                                                                                                                                   |
| EPI_ISL_1013417, EPI_ISL_1013423, EPI_ISL_1013431, EPI_ISL_1013434, EPI_ISL_1013435                                                                                                                                                                                                                                                                                                                                                                     | Institut Pasteur de Guadeloupe                                                      | National Reference Center for Viruses of Respiratory Infections, Institut Pasteur, Paris                                                                                                                                                                                                                        | Angela Brisebarre; Camille Capel; Etienne Simon-Lorière; Marion Barbet; Maud Vanpeene; Méline Bizard; Sylvie Behillil; Sylvie van der Werf; Talarmin Antoine; Vincent Enouf                                                                                                                                                                                                                                                                                                                                                           |
| EPI_ISL_999032                                                                                                                                                                                                                                                                                                                                                                                                                                          | Institut Pasteur de Guinée                                                          | Institut Pasteur de Dakar                                                                                                                                                                                                                                                                                       | Dia Ndongo; Diagne Moussa Moïse; Diallo Amadou; Diop Mamadou; Faye Ousmane; Grayo Solere; Loucoubar Cheikh; Mbengue Safietou Sankhe; Ndiaye Ndack; Sall Amadou Alpha; Tordo Noel                                                                                                                                                                                                                                                                                                                                                      |
| EPI_ISL_613421, EPI_ISL_613425, EPI_ISL_613431, EPI_ISL_613433, EPI_ISL_613444, EPI_ISL_613451, EPI_ISL_613454                                                                                                                                                                                                                                                                                                                                          | see above                                                                           | Institut Pasteur de la Guadeloupe                                                                                                                                                                                                                                                                               | Angela Brisebarre; Antoine Talarmin; Camille Capel; Cherina Fleming; Etienne Simon-Lorière; Marion Barbet; Maud Vanpeene; Méline Bizard; Radjin Steingrover; Stéphanie Guymard; Sylvie Behillil; Sylvie van der Werf; Sébastien Breurec; Vincent Enouf                                                                                                                                                                                                                                                                                |
| EPI_ISL_459975, EPI_ISL_459984                                                                                                                                                                                                                                                                                                                                                                                                                          | Institut Pasteur du Maroc                                                           | Institut Pasteur du Maroc                                                                                                                                                                                                                                                                                       | Abdellah Faouzi; Anass Abbad; Andersrahmane Maaroufi; Angela Brisebarre; Camille Capel; Etienne Simon-Lorière; Jalal Nourill; Latifa Anga; Marion Barbet; Maud Vanpeene; Mjid Eloualid; Méline Bizard; Sylvie Behillil; Sylvie van der Werf; Vincent Enouf                                                                                                                                                                                                                                                                            |
| EPI_ISL_1008011                                                                                                                                                                                                                                                                                                                                                                                                                                         | Institut für Pathologie, Salzkammergut Klinikum Vöcklabruck                         | Bergthaler laboratory, CeMM Research Center for Molecular Medicine of the Austrian Academy of Sciences                                                                                                                                                                                                          | Andreas Bergthaler; Anna Schedl; Bekir Erguner; Benedikt Agerer; Christoph Bock; Jan Laine; Lukas Endler; Maelle Le Moing; Martin Senekowitsch; Michael Schuster; Thomas Penz                                                                                                                                                                                                                                                                                                                                                         |
| EPI_ISL_955166                                                                                                                                                                                                                                                                                                                                                                                                                                          | Institute for Biocides and Medical Ecology                                          | Institute of microbiology and Immunology, Faculty of Medicine, University of Belgrade                                                                                                                                                                                                                           | Jankovic, M.; Jovanovic, T.; Knezevic, A.; Milicevic, O.; Sekler, M.; Tesovic, B.; Vidanovic, D.                                                                                                                                                                                                                                                                                                                                                                                                                                      |
| EPI_ISL_430442, EPI_ISL_430443, EPI_ISL_430444, EPI_ISL_490015, EPI_ISL_596449, EPI_ISL_718268, EPI_ISL_718277, EPI_ISL_718298, EPI_ISL_728167, EPI_ISL_728170, EPI_ISL_728209, EPI_ISL_728253, EPI_ISL_877228, EPI_ISL_912397, EPI_ISL_944096, EPI_ISL_944099, EPI_ISL_944100, EPI_ISL_944104, EPI_ISL_1055261, EPI_ISL_1055264, EPI_ISL_1055362, EPI_ISL_1068849, EPI_ISL_1068851, EPI_ISL_1068927, EPI_ISL_1081351, EPI_ISL_1114734, EPI_ISL_1114765 | see above                                                                           | Institute for Medical Research, Infectious Disease Research Centre, National Institutes of Health, Ministry of Health Malaysia                                                                                                                                                                                  | Institute for Medical Research, Infectious Disease Research Centre, National Institutes of Health, Ministry of Health Malaysia                                                                                                                                                                                                                                                                                                                                                                                                        |
| EPI_ISL_733528, EPI_ISL_733530, EPI_ISL_733531, EPI_ISL_733552, EPI_ISL_733566, EPI_ISL_812943, EPI_ISL_812945, EPI_ISL_882776, EPI_ISL_882786, EPI_ISL_882788, EPI_ISL_882791                                                                                                                                                                                                                                                                          | see above                                                                           | Institute for Urban Disease Control and Prevention                                                                                                                                                                                                                                                              | COVID-19 Network Investigations (CONI) Alliance                                                                                                                                                                                                                                                                                                                                                                                                                                                                                       |
| EPI_ISL_1057098                                                                                                                                                                                                                                                                                                                                                                                                                                         | Institute of Biocides and Medical Ecology, Belgrade, Serbia                         | Virology Department Institute of Microbiology and Immunology Faculty of Medicine University of Belgrade                                                                                                                                                                                                         | Amornmas Kongkleng; Anek Mungaomklang; Angkana Huang; Anthony R. Jones; Arporn Wangwiwatsin; Bhakbhoon Panthan; Chonticha Klungtong; Duangkamon Loesbanluetchai; Ekawat Pasomsub; Elizabeth Batty; Insee Sensor; Janjira Thaipadungpanit; Kamolthip Atsawaranunt; Khajohn Joonsalak; Kingkan Rakmanee; Krittikorn Kumpornsin; Namfon Kotanan; Prayuth Kaewmalang; Pukkapon Parmwijitkul; Stefan Fernandez; Thanat Chookajorn; Theerarat Kochakarn; Treerat Watthanachockchai; Vichan Pawun; Wasun Chantraita; Wuditchai Manasatienkij |
|                                                                                                                                                                                                                                                                                                                                                                                                                                                         |                                                                                     |                                                                                                                                                                                                                                                                                                                 | Abazovic Dzihan; Banko Ana; Despot Dragana; Loncar Ana; Milicevic Ognjen; Miljanovic Danijela                                                                                                                                                                                                                                                                                                                                                                                                                                         |

|                                                                                                                                                                                                                                                                                                                                                                                                                                                                                                                                                                                                                                                                                                                                                                                                                                                                                                                                                                                                                                                                                                                                                                                                                                                                                                                                                                                                                                                                                                                                                                                                                                                                                                                                                                                                                                                                                                                                                                                                                                                                                                                                                                                                                                                                                                                                                                                                                                                                                                                                                                                                                                                                                                                                                                                                                                                                                                                                                                                                                                                                                                                                                                                                                                                                                                                                                                                                                                                                                                                                                                                                                                                                                                                                                                                                                                                                                                                                                                                                                                                                                                                                                                                                                                                                                                                                                                                                                                                                                                                                                                                                                                                                                                                                                                                                                                                                                                                                                                                                                                                                                                                                                                                                                                                                                                                                                                                                                                                                                                                                                                                                                                                                                                                                                                                                                                                                                                                                                                                                                                                                                                                                                                                                                                                                                                                                                                                                                                                                                                                                                                                                                                                                                                                                                                                                                                                                                                                                                                                                                                                                                                                                                                                                                                                                                                                                                                                                                                                                                                                                                                                                                                                                                                                                                                                                                                                                                                                                                                                                                                                                                                                                                                                                                                                                                                                                                                                                                                                                                                                                                                                                                                                                                                                                                                                                                                                                                                                                                                                                                                                                                                                                                                                                                                                                                                                                                                                                                                                                                                                                                                                                                                                                                                                                                                                                                                                                                                                                                                                                                                                                                                                                                                                                                                                                                                                                                                                                                                                                                                                                                                                                                                                                                                                                                                                                                                                                                                                                                                                                                                                                                                                                                                                                                                                                                                                                                                                                                                                                                                                                                                                                                                                                                                                                                                                                                                                                                                                                                                                                                                                                                                                                                                                                                                                                                                                                                |                                                                                                 |                                                                                                         |                                                                                                                                                                                                                                                                                                                                                                                                                                                                                                                                                                                                                                                                                                                                                                                                                                                                                                                                                                                                                                                                                                          |
|------------------------------------------------------------------------------------------------------------------------------------------------------------------------------------------------------------------------------------------------------------------------------------------------------------------------------------------------------------------------------------------------------------------------------------------------------------------------------------------------------------------------------------------------------------------------------------------------------------------------------------------------------------------------------------------------------------------------------------------------------------------------------------------------------------------------------------------------------------------------------------------------------------------------------------------------------------------------------------------------------------------------------------------------------------------------------------------------------------------------------------------------------------------------------------------------------------------------------------------------------------------------------------------------------------------------------------------------------------------------------------------------------------------------------------------------------------------------------------------------------------------------------------------------------------------------------------------------------------------------------------------------------------------------------------------------------------------------------------------------------------------------------------------------------------------------------------------------------------------------------------------------------------------------------------------------------------------------------------------------------------------------------------------------------------------------------------------------------------------------------------------------------------------------------------------------------------------------------------------------------------------------------------------------------------------------------------------------------------------------------------------------------------------------------------------------------------------------------------------------------------------------------------------------------------------------------------------------------------------------------------------------------------------------------------------------------------------------------------------------------------------------------------------------------------------------------------------------------------------------------------------------------------------------------------------------------------------------------------------------------------------------------------------------------------------------------------------------------------------------------------------------------------------------------------------------------------------------------------------------------------------------------------------------------------------------------------------------------------------------------------------------------------------------------------------------------------------------------------------------------------------------------------------------------------------------------------------------------------------------------------------------------------------------------------------------------------------------------------------------------------------------------------------------------------------------------------------------------------------------------------------------------------------------------------------------------------------------------------------------------------------------------------------------------------------------------------------------------------------------------------------------------------------------------------------------------------------------------------------------------------------------------------------------------------------------------------------------------------------------------------------------------------------------------------------------------------------------------------------------------------------------------------------------------------------------------------------------------------------------------------------------------------------------------------------------------------------------------------------------------------------------------------------------------------------------------------------------------------------------------------------------------------------------------------------------------------------------------------------------------------------------------------------------------------------------------------------------------------------------------------------------------------------------------------------------------------------------------------------------------------------------------------------------------------------------------------------------------------------------------------------------------------------------------------------------------------------------------------------------------------------------------------------------------------------------------------------------------------------------------------------------------------------------------------------------------------------------------------------------------------------------------------------------------------------------------------------------------------------------------------------------------------------------------------------------------------------------------------------------------------------------------------------------------------------------------------------------------------------------------------------------------------------------------------------------------------------------------------------------------------------------------------------------------------------------------------------------------------------------------------------------------------------------------------------------------------------------------------------------------------------------------------------------------------------------------------------------------------------------------------------------------------------------------------------------------------------------------------------------------------------------------------------------------------------------------------------------------------------------------------------------------------------------------------------------------------------------------------------------------------------------------------------------------------------------------------------------------------------------------------------------------------------------------------------------------------------------------------------------------------------------------------------------------------------------------------------------------------------------------------------------------------------------------------------------------------------------------------------------------------------------------------------------------------------------------------------------------------------------------------------------------------------------------------------------------------------------------------------------------------------------------------------------------------------------------------------------------------------------------------------------------------------------------------------------------------------------------------------------------------------------------------------------------------------------------------------------------------------------------------------------------------------------------------------------------------------------------------------------------------------------------------------------------------------------------------------------------------------------------------------------------------------------------------------------------------------------------------------------------------------------------------------------------------------------------------------------------------------------------------------------------------------------------------------------------------------------------------------------------------------------------------------------------------------------------------------------------------------------------------------------------------------------------------------------------------------------------------------------------------------------------------------------------------------------------------------------------------------------------------------------------------------------------------------------------------------------------------------------------------------------------------------------------------------------------------------------------------------------------------------------------------------------------------------------------------------------------------------------------------------------------------------------------------------------------------------------------------------------------------------------------------------------------------------------------------------------------------------------------------------------------------------------------------------------------------------------------------------------------------------------------------------------------------------------------------------------------------------------------------------------------------------------------------------------------------------------------------------------------------------------------------------------------------------------------------------------------------------------------------------------------------------------------------------------------------------------------------------------------------------------------------------------------------------------------------------------------------------------------------------------------------------------------------------------------------------------------------------------------------------------------------------------------------------------------------------------------------------------------------------------------------------------------------------------------------------------------------------------------------------------------------------------------------------------------------------------------------------------------------------------------------------------------------------------------------------------------------------------------------------------------------------------------------------------------------------------------------------------------------------------------------------------------------------------------------------------------------------------------------------------------------------------------------------------------------------------------------------------------------------------------------------------------------------------------------------------------------------------------------------------------------------------------------------------------------------------------------------------------------------------------------------------------------------------------------------------------------------------------------------------------------------------------------------------------------------------------------------------------------------------------------------------------------------------------------------------------------------------------------------------------------------------------------------------------------------------------------------------------------------------------------------------------------------------------------------------|-------------------------------------------------------------------------------------------------|---------------------------------------------------------------------------------------------------------|----------------------------------------------------------------------------------------------------------------------------------------------------------------------------------------------------------------------------------------------------------------------------------------------------------------------------------------------------------------------------------------------------------------------------------------------------------------------------------------------------------------------------------------------------------------------------------------------------------------------------------------------------------------------------------------------------------------------------------------------------------------------------------------------------------------------------------------------------------------------------------------------------------------------------------------------------------------------------------------------------------------------------------------------------------------------------------------------------------|
| EPI_ISL_600562                                                                                                                                                                                                                                                                                                                                                                                                                                                                                                                                                                                                                                                                                                                                                                                                                                                                                                                                                                                                                                                                                                                                                                                                                                                                                                                                                                                                                                                                                                                                                                                                                                                                                                                                                                                                                                                                                                                                                                                                                                                                                                                                                                                                                                                                                                                                                                                                                                                                                                                                                                                                                                                                                                                                                                                                                                                                                                                                                                                                                                                                                                                                                                                                                                                                                                                                                                                                                                                                                                                                                                                                                                                                                                                                                                                                                                                                                                                                                                                                                                                                                                                                                                                                                                                                                                                                                                                                                                                                                                                                                                                                                                                                                                                                                                                                                                                                                                                                                                                                                                                                                                                                                                                                                                                                                                                                                                                                                                                                                                                                                                                                                                                                                                                                                                                                                                                                                                                                                                                                                                                                                                                                                                                                                                                                                                                                                                                                                                                                                                                                                                                                                                                                                                                                                                                                                                                                                                                                                                                                                                                                                                                                                                                                                                                                                                                                                                                                                                                                                                                                                                                                                                                                                                                                                                                                                                                                                                                                                                                                                                                                                                                                                                                                                                                                                                                                                                                                                                                                                                                                                                                                                                                                                                                                                                                                                                                                                                                                                                                                                                                                                                                                                                                                                                                                                                                                                                                                                                                                                                                                                                                                                                                                                                                                                                                                                                                                                                                                                                                                                                                                                                                                                                                                                                                                                                                                                                                                                                                                                                                                                                                                                                                                                                                                                                                                                                                                                                                                                                                                                                                                                                                                                                                                                                                                                                                                                                                                                                                                                                                                                                                                                                                                                                                                                                                                                                                                                                                                                                                                                                                                                                                                                                                                                                                                                                                                 | Institute of Epidemiology Disease Control And Research                                          | Institute for Developing Science and Health Initiatives                                                 | Firadausi Qadri; Lauren Cowley; Md. Mahfuz-Al-mamun; Mokibul Hassan Afrad; Sadia Isfat Ara Rahman; Tahmina Shirin                                                                                                                                                                                                                                                                                                                                                                                                                                                                                                                                                                                                                                                                                                                                                                                                                                                                                                                                                                                        |
| EPI_ISL_864563, EPI_ISL_1034815                                                                                                                                                                                                                                                                                                                                                                                                                                                                                                                                                                                                                                                                                                                                                                                                                                                                                                                                                                                                                                                                                                                                                                                                                                                                                                                                                                                                                                                                                                                                                                                                                                                                                                                                                                                                                                                                                                                                                                                                                                                                                                                                                                                                                                                                                                                                                                                                                                                                                                                                                                                                                                                                                                                                                                                                                                                                                                                                                                                                                                                                                                                                                                                                                                                                                                                                                                                                                                                                                                                                                                                                                                                                                                                                                                                                                                                                                                                                                                                                                                                                                                                                                                                                                                                                                                                                                                                                                                                                                                                                                                                                                                                                                                                                                                                                                                                                                                                                                                                                                                                                                                                                                                                                                                                                                                                                                                                                                                                                                                                                                                                                                                                                                                                                                                                                                                                                                                                                                                                                                                                                                                                                                                                                                                                                                                                                                                                                                                                                                                                                                                                                                                                                                                                                                                                                                                                                                                                                                                                                                                                                                                                                                                                                                                                                                                                                                                                                                                                                                                                                                                                                                                                                                                                                                                                                                                                                                                                                                                                                                                                                                                                                                                                                                                                                                                                                                                                                                                                                                                                                                                                                                                                                                                                                                                                                                                                                                                                                                                                                                                                                                                                                                                                                                                                                                                                                                                                                                                                                                                                                                                                                                                                                                                                                                                                                                                                                                                                                                                                                                                                                                                                                                                                                                                                                                                                                                                                                                                                                                                                                                                                                                                                                                                                                                                                                                                                                                                                                                                                                                                                                                                                                                                                                                                                                                                                                                                                                                                                                                                                                                                                                                                                                                                                                                                                                                                                                                                                                                                                                                                                                                                                                                                                                                                                                                                                | Institute of Medical Microbiology and Hospital Hygiene                                          | Institute of Medical Microbiology and Hospital Hygiene                                                  | Alojscha Tersteegen; Prof. Dr. Achim Kaasch                                                                                                                                                                                                                                                                                                                                                                                                                                                                                                                                                                                                                                                                                                                                                                                                                                                                                                                                                                                                                                                              |
| EPI_ISL_877428, EPI_ISL_877429, EPI_ISL_877439, EPI_ISL_877455, EPI_ISL_906125, EPI_ISL_906129, EPI_ISL_979246, EPI_ISL_979249, EPI_ISL_979256, EPI_ISL_979261, EPI_ISL_979265, EPI_ISL_1063497, EPI_ISL_1063512, EPI_ISL_1063523, EPI_ISL_1098791, EPI_ISL_1098792, EPI_ISL_1098794, EPI_ISL_1098795, EPI_ISL_1098797, EPI_ISL_1118854, EPI_ISL_1118863, EPI_ISL_1118869                                                                                                                                                                                                                                                                                                                                                                                                                                                                                                                                                                                                                                                                                                                                                                                                                                                                                                                                                                                                                                                                                                                                                                                                                                                                                                                                                                                                                                                                                                                                                                                                                                                                                                                                                                                                                                                                                                                                                                                                                                                                                                                                                                                                                                                                                                                                                                                                                                                                                                                                                                                                                                                                                                                                                                                                                                                                                                                                                                                                                                                                                                                                                                                                                                                                                                                                                                                                                                                                                                                                                                                                                                                                                                                                                                                                                                                                                                                                                                                                                                                                                                                                                                                                                                                                                                                                                                                                                                                                                                                                                                                                                                                                                                                                                                                                                                                                                                                                                                                                                                                                                                                                                                                                                                                                                                                                                                                                                                                                                                                                                                                                                                                                                                                                                                                                                                                                                                                                                                                                                                                                                                                                                                                                                                                                                                                                                                                                                                                                                                                                                                                                                                                                                                                                                                                                                                                                                                                                                                                                                                                                                                                                                                                                                                                                                                                                                                                                                                                                                                                                                                                                                                                                                                                                                                                                                                                                                                                                                                                                                                                                                                                                                                                                                                                                                                                                                                                                                                                                                                                                                                                                                                                                                                                                                                                                                                                                                                                                                                                                                                                                                                                                                                                                                                                                                                                                                                                                                                                                                                                                                                                                                                                                                                                                                                                                                                                                                                                                                                                                                                                                                                                                                                                                                                                                                                                                                                                                                                                                                                                                                                                                                                                                                                                                                                                                                                                                                                                                                                                                                                                                                                                                                                                                                                                                                                                                                                                                                                                                                                                                                                                                                                                                                                                                                                                                                                                                                                                                                                      | Institute of Microbiology and Immunology, Faculty of Medicine, University of Ljubljana          | Institute of Microbiology and Immunology, Faculty of Medicine, University of Ljubljana                  | Alen Sulji; Andrej Celar; Dominika Šturm; Doroteja Vljaj; Mario Poljak; Matic Brvar; Miša Korva; Patricija Pozvek; Samo Zakotnik; Tatjana Avši - Županc; Tatjana Avši - Županc; Tomaž Mark Zorec; Špela Pleh                                                                                                                                                                                                                                                                                                                                                                                                                                                                                                                                                                                                                                                                                                                                                                                                                                                                                             |
| see above                                                                                                                                                                                                                                                                                                                                                                                                                                                                                                                                                                                                                                                                                                                                                                                                                                                                                                                                                                                                                                                                                                                                                                                                                                                                                                                                                                                                                                                                                                                                                                                                                                                                                                                                                                                                                                                                                                                                                                                                                                                                                                                                                                                                                                                                                                                                                                                                                                                                                                                                                                                                                                                                                                                                                                                                                                                                                                                                                                                                                                                                                                                                                                                                                                                                                                                                                                                                                                                                                                                                                                                                                                                                                                                                                                                                                                                                                                                                                                                                                                                                                                                                                                                                                                                                                                                                                                                                                                                                                                                                                                                                                                                                                                                                                                                                                                                                                                                                                                                                                                                                                                                                                                                                                                                                                                                                                                                                                                                                                                                                                                                                                                                                                                                                                                                                                                                                                                                                                                                                                                                                                                                                                                                                                                                                                                                                                                                                                                                                                                                                                                                                                                                                                                                                                                                                                                                                                                                                                                                                                                                                                                                                                                                                                                                                                                                                                                                                                                                                                                                                                                                                                                                                                                                                                                                                                                                                                                                                                                                                                                                                                                                                                                                                                                                                                                                                                                                                                                                                                                                                                                                                                                                                                                                                                                                                                                                                                                                                                                                                                                                                                                                                                                                                                                                                                                                                                                                                                                                                                                                                                                                                                                                                                                                                                                                                                                                                                                                                                                                                                                                                                                                                                                                                                                                                                                                                                                                                                                                                                                                                                                                                                                                                                                                                                                                                                                                                                                                                                                                                                                                                                                                                                                                                                                                                                                                                                                                                                                                                                                                                                                                                                                                                                                                                                                                                                                                                                                                                                                                                                                                                                                                                                                                                                                                                                                                                      | Institute of Microbiology and Immunology, Faculty of Medicine, University of Ljubljana          | Institute of Microbiology and Immunology, Faculty of Medicine, University of Ljubljana                  | Alen Sulji; Andrej Celar; Dominika Šturm; Doroteja Vljaj; Mario Poljak; Matic Brvar; Miša Korva; Patricija Pozvek; Samo Zakotnik; Tatjana Avši - Županc; Tatjana Avši - Županc; Tomaž Mark Zorec; Špela Pleh                                                                                                                                                                                                                                                                                                                                                                                                                                                                                                                                                                                                                                                                                                                                                                                                                                                                                             |
| EPI_ISL_417482, EPI_ISL_486846, EPI_ISL_486851, EPI_ISL_491937, EPI_ISL_491939, EPI_ISL_516649, EPI_ISL_525430, EPI_ISL_539788, EPI_ISL_660529, EPI_ISL_660533, EPI_ISL_660534, EPI_ISL_660535, EPI_ISL_660536, EPI_ISL_660539, EPI_ISL_697788, EPI_ISL_697794, EPI_ISL_697798, EPI_ISL_697799, EPI_ISL_697800, EPI_ISL_728202, EPI_ISL_728203, EPI_ISL_728204, EPI_ISL_728205, EPI_ISL_803098, EPI_ISL_824284, EPI_ISL_824285, EPI_ISL_824286, EPI_ISL_824287, EPI_ISL_824288, EPI_ISL_824289, EPI_ISL_824290, EPI_ISL_824291, EPI_ISL_824292, EPI_ISL_824293, EPI_ISL_824294, EPI_ISL_824295, EPI_ISL_824296, EPI_ISL_824297, EPI_ISL_824298, EPI_ISL_824299, EPI_ISL_824300, EPI_ISL_824301, EPI_ISL_824302, EPI_ISL_824303, EPI_ISL_824304, EPI_ISL_824305, EPI_ISL_824306, EPI_ISL_824307, EPI_ISL_824308, EPI_ISL_824309, EPI_ISL_824310, EPI_ISL_824311, EPI_ISL_824312, EPI_ISL_824313, EPI_ISL_824314, EPI_ISL_824315, EPI_ISL_824316, EPI_ISL_824317, EPI_ISL_824318, EPI_ISL_824319, EPI_ISL_824320, EPI_ISL_824321, EPI_ISL_824322, EPI_ISL_824323, EPI_ISL_824324, EPI_ISL_824325, EPI_ISL_824326, EPI_ISL_824327, EPI_ISL_824328, EPI_ISL_824329, EPI_ISL_824330, EPI_ISL_824331, EPI_ISL_824332, EPI_ISL_824333, EPI_ISL_824334, EPI_ISL_824335, EPI_ISL_824336, EPI_ISL_824337, EPI_ISL_824338, EPI_ISL_824339, EPI_ISL_824340, EPI_ISL_824341, EPI_ISL_824342, EPI_ISL_824343, EPI_ISL_824344, EPI_ISL_824345, EPI_ISL_824346, EPI_ISL_824347, EPI_ISL_824348, EPI_ISL_824349, EPI_ISL_824350, EPI_ISL_824351, EPI_ISL_824352, EPI_ISL_824353, EPI_ISL_824354, EPI_ISL_824355, EPI_ISL_824356, EPI_ISL_824357, EPI_ISL_824358, EPI_ISL_824359, EPI_ISL_824360, EPI_ISL_824361, EPI_ISL_824362, EPI_ISL_824363, EPI_ISL_824364, EPI_ISL_824365, EPI_ISL_824366, EPI_ISL_824367, EPI_ISL_824368, EPI_ISL_824369, EPI_ISL_824370, EPI_ISL_824371, EPI_ISL_824372, EPI_ISL_824373, EPI_ISL_824374, EPI_ISL_824375, EPI_ISL_824376, EPI_ISL_824377, EPI_ISL_824378, EPI_ISL_824379, EPI_ISL_824380, EPI_ISL_824381, EPI_ISL_824382, EPI_ISL_824383, EPI_ISL_824384, EPI_ISL_824385, EPI_ISL_824386, EPI_ISL_824387, EPI_ISL_824388, EPI_ISL_824389, EPI_ISL_824390, EPI_ISL_824391, EPI_ISL_824392, EPI_ISL_824393, EPI_ISL_824394, EPI_ISL_824395, EPI_ISL_824396, EPI_ISL_824397, EPI_ISL_824398, EPI_ISL_824399, EPI_ISL_824400, EPI_ISL_824401, EPI_ISL_824402, EPI_ISL_824403, EPI_ISL_824404, EPI_ISL_824405, EPI_ISL_824406, EPI_ISL_824407, EPI_ISL_824408, EPI_ISL_824409, EPI_ISL_824410, EPI_ISL_824411, EPI_ISL_824412, EPI_ISL_824413, EPI_ISL_824414, EPI_ISL_824415, EPI_ISL_824416, EPI_ISL_824417, EPI_ISL_824418, EPI_ISL_824419, EPI_ISL_824420, EPI_ISL_824421, EPI_ISL_824422, EPI_ISL_824423, EPI_ISL_824424, EPI_ISL_824425, EPI_ISL_824426, EPI_ISL_824427, EPI_ISL_824428, EPI_ISL_824429, EPI_ISL_824430, EPI_ISL_824431, EPI_ISL_824432, EPI_ISL_824433, EPI_ISL_824434, EPI_ISL_824435, EPI_ISL_824436, EPI_ISL_824437, EPI_ISL_824438, EPI_ISL_824439, EPI_ISL_824440, EPI_ISL_824441, EPI_ISL_824442, EPI_ISL_824443, EPI_ISL_824444, EPI_ISL_824445, EPI_ISL_824446, EPI_ISL_824447, EPI_ISL_824448, EPI_ISL_824449, EPI_ISL_824450, EPI_ISL_824451, EPI_ISL_824452, EPI_ISL_824453, EPI_ISL_824454, EPI_ISL_824455, EPI_ISL_824456, EPI_ISL_824457, EPI_ISL_824458, EPI_ISL_824459, EPI_ISL_824460, EPI_ISL_824461, EPI_ISL_824462, EPI_ISL_824463, EPI_ISL_824464, EPI_ISL_824465, EPI_ISL_824466, EPI_ISL_824467, EPI_ISL_824468, EPI_ISL_824469, EPI_ISL_824470, EPI_ISL_824471, EPI_ISL_824472, EPI_ISL_824473, EPI_ISL_824474, EPI_ISL_824475, EPI_ISL_824476, EPI_ISL_824477, EPI_ISL_824478, EPI_ISL_824479, EPI_ISL_824480, EPI_ISL_824481, EPI_ISL_824482, EPI_ISL_824483, EPI_ISL_824484, EPI_ISL_824485, EPI_ISL_824486, EPI_ISL_824487, EPI_ISL_824488, EPI_ISL_824489, EPI_ISL_824490, EPI_ISL_824491, EPI_ISL_824492, EPI_ISL_824493, EPI_ISL_824494, EPI_ISL_824495, EPI_ISL_824496, EPI_ISL_824497, EPI_ISL_824498, EPI_ISL_824499, EPI_ISL_824500, EPI_ISL_824501, EPI_ISL_824502, EPI_ISL_824503, EPI_ISL_824504, EPI_ISL_824505, EPI_ISL_824506, EPI_ISL_824507, EPI_ISL_824508, EPI_ISL_824509, EPI_ISL_824510, EPI_ISL_824511, EPI_ISL_824512, EPI_ISL_824513, EPI_ISL_824514, EPI_ISL_824515, EPI_ISL_824516, EPI_ISL_824517, EPI_ISL_824518, EPI_ISL_824519, EPI_ISL_824520, EPI_ISL_824521, EPI_ISL_824522, EPI_ISL_824523, EPI_ISL_824524, EPI_ISL_824525, EPI_ISL_824526, EPI_ISL_824527, EPI_ISL_824528, EPI_ISL_824529, EPI_ISL_824530, EPI_ISL_824531, EPI_ISL_824532, EPI_ISL_824533, EPI_ISL_824534, EPI_ISL_824535, EPI_ISL_824536, EPI_ISL_824537, EPI_ISL_824538, EPI_ISL_824539, EPI_ISL_824540, EPI_ISL_824541, EPI_ISL_824542, EPI_ISL_824543, EPI_ISL_824544, EPI_ISL_824545, EPI_ISL_824546, EPI_ISL_824547, EPI_ISL_824548, EPI_ISL_824549, EPI_ISL_824550, EPI_ISL_824551, EPI_ISL_824552, EPI_ISL_824553, EPI_ISL_824554, EPI_ISL_824555, EPI_ISL_824556, EPI_ISL_824557, EPI_ISL_824558, EPI_ISL_824559, EPI_ISL_824560, EPI_ISL_824561, EPI_ISL_824562, EPI_ISL_824563, EPI_ISL_824564, EPI_ISL_824565, EPI_ISL_824566, EPI_ISL_824567, EPI_ISL_824568, EPI_ISL_824569, EPI_ISL_824570, EPI_ISL_824571, EPI_ISL_824572, EPI_ISL_824573, EPI_ISL_824574, EPI_ISL_824575, EPI_ISL_824576, EPI_ISL_824577, EPI_ISL_824578, EPI_ISL_824579, EPI_ISL_824580, EPI_ISL_824581, EPI_ISL_824582, EPI_ISL_824583, EPI_ISL_824584, EPI_ISL_824585, EPI_ISL_824586, EPI_ISL_824587, EPI_ISL_824588, EPI_ISL_824589, EPI_ISL_824590, EPI_ISL_824591, EPI_ISL_824592, EPI_ISL_824593, EPI_ISL_824594, EPI_ISL_824595, EPI_ISL_824596, EPI_ISL_824597, EPI_ISL_824598, EPI_ISL_824599, EPI_ISL_824600, EPI_ISL_824601, EPI_ISL_824602, EPI_ISL_824603, EPI_ISL_824604, EPI_ISL_824605, EPI_ISL_824606, EPI_ISL_824607, EPI_ISL_824608, EPI_ISL_824609, EPI_ISL_824610, EPI_ISL_824611, EPI_ISL_824612, EPI_ISL_824613, EPI_ISL_824614, EPI_ISL_824615, EPI_ISL_824616, EPI_ISL_824617, EPI_ISL_824618, EPI_ISL_824619, EPI_ISL_824620, EPI_ISL_824621, EPI_ISL_824622, EPI_ISL_824623, EPI_ISL_824624, EPI_ISL_824625, EPI_ISL_824626, EPI_ISL_824627, EPI_ISL_824628, EPI_ISL_824629, EPI_ISL_824630, EPI_ISL_824631, EPI_ISL_824632, EPI_ISL_824633, EPI_ISL_824634, EPI_ISL_824635, EPI_ISL_824636, EPI_ISL_824637, EPI_ISL_824638, EPI_ISL_824639, EPI_ISL_824640, EPI_ISL_824641, EPI_ISL_824642, EPI_ISL_824643, EPI_ISL_824644, EPI_ISL_824645, EPI_ISL_824646, EPI_ISL_824647, EPI_ISL_824648, EPI_ISL_824649, EPI_ISL_824650, EPI_ISL_824651, EPI_ISL_824652, EPI_ISL_824653, EPI_ISL_824654, EPI_ISL_824655, EPI_ISL_824656, EPI_ISL_824657, EPI_ISL_824658, EPI_ISL_824659, EPI_ISL_824660, EPI_ISL_824661, EPI_ISL_824662, EPI_ISL_824663, EPI_ISL_824664, EPI_ISL_824665, EPI_ISL_824666, EPI_ISL_824667, EPI_ISL_824668, EPI_ISL_824669, EPI_ISL_824670, EPI_ISL_824671, EPI_ISL_824672, EPI_ISL_824673, EPI_ISL_824674, EPI_ISL_824675, EPI_ISL_824676, EPI_ISL_824677, EPI_ISL_824678, EPI_ISL_824679, EPI_ISL_824680, EPI_ISL_824681, EPI_ISL_824682, EPI_ISL_824683, EPI_ISL_824684, EPI_ISL_824685, EPI_ISL_824686, EPI_ISL_824687, EPI_ISL_824688, EPI_ISL_824689, EPI_ISL_824690, EPI_ISL_824691, EPI_ISL_824692, EPI_ISL_824693, EPI_ISL_824694, EPI_ISL_824695, EPI_ISL_824696, EPI_ISL_824697, EPI_ISL_824698, EPI_ISL_824699, EPI_ISL_824700, EPI_ISL_824701, EPI_ISL_824702, EPI_ISL_824703, EPI_ISL_824704, EPI_ISL_824705, EPI_ISL_824706, EPI_ISL_824707, EPI_ISL_824708, EPI_ISL_824709, EPI_ISL_824710, EPI_ISL_824711, EPI_ISL_824712, EPI_ISL_824713, EPI_ISL_824714, EPI_ISL_824715, EPI_ISL_824716, EPI_ISL_824717, EPI_ISL_824718, EPI_ISL_824719, EPI_ISL_824720, EPI_ISL_824721, EPI_ISL_824722, EPI_ISL_824723, EPI_ISL_824724, EPI_ISL_824725, EPI_ISL_824726, EPI_ISL_824727, EPI_ISL_824728, EPI_ISL_824729, EPI_ISL_824730, EPI_ISL_824731, EPI_ISL_824732, EPI_ISL_824733, EPI_ISL_824734, EPI_ISL_824735, EPI_ISL_824736, EPI_ISL_824737, EPI_ISL_824738, EPI_ISL_824739, EPI_ISL_824740, EPI_ISL_824741, EPI_ISL_824742, EPI_ISL_824743, EPI_ISL_824744, EPI_ISL_824745, EPI_ISL_824746, EPI_ISL_824747, EPI_ISL_824748, EPI_ISL_824749, EPI_ISL_824750, EPI_ISL_824751, EPI_ISL_824752, EPI_ISL_824753, EPI_ISL_824754, EPI_ISL_824755, EPI_ISL_824756, EPI_ISL_824757, EPI_ISL_824758, EPI_ISL_824759, EPI_ISL_824760, EPI_ISL_824761, EPI_ISL_824762, EPI_ISL_824763, EPI_ISL_824764, EPI_ISL_824765, EPI_ISL_824766, EPI_ISL_824767, EPI_ISL_824768, EPI_ISL_824769, EPI_ISL_824770, EPI_ISL_824771, EPI_ISL_824772, EPI_ISL_824773, EPI_ISL_824774, EPI_ISL_824775, EPI_ISL_824776, EPI_ISL_824777, EPI_ISL_824778, EPI_ISL_824779, EPI_ISL_824780, EPI_ISL_824781, EPI_ISL_824782, EPI_ISL_824783, EPI_ISL_824784, EPI_ISL_824785, EPI_ISL_824786, EPI_ISL_824787, EPI_ISL_824788, EPI_ISL_824789, EPI_ISL_824790, EPI_ISL_824791, EPI_ISL_824792, EPI_ISL_824793, EPI_ISL_824794, EPI_ISL_824795, EPI_ISL_824796, EPI_ISL_824797, EPI_ISL_824798, EPI_ISL_824799, EPI_ISL_824800, EPI_ISL_824801, EPI_ISL_824802, EPI_ISL_824803, EPI_ISL_824804, EPI_ISL_824805, EPI_ISL_824806, EPI_ISL_824807, EPI_ISL_824808, EPI_ISL_824809, EPI_ISL_824810, EPI_ISL_824811, EPI_ISL_824812, EPI_ISL_824813, EPI_ISL_824814, EPI_ISL_824815, EPI_ISL_824816, EPI_ISL_824817, EPI_ISL_824818, EPI_ISL_824819, EPI_ISL_824820, EPI_ISL_824821, EPI_ISL_824822, EPI_ISL_824823, EPI_ISL_824824, EPI_ISL_824825, EPI_ISL_824826, EPI_ISL_824827, EPI_ISL_824828, EPI_ISL_824829, EPI_ISL_824830, EPI_ISL_824831, EPI_ISL_824832, EPI_ISL_824833, EPI_ISL_824834, EPI_ISL_824835, EPI_ISL_824836, EPI_ISL_824837, EPI_ISL_824838, EPI_ISL_824839, EPI_ISL_824840, EPI_ISL_824841, EPI_ISL_824842, EPI_ISL_824843, EPI_ISL_824844, EPI_ISL_824845, EPI_ISL_824846, EPI_ISL_824847, EPI_ISL_824848, EPI_ISL_824849, EPI_ISL_824850, EPI_ISL_824851, EPI_ISL_824852, EPI_ISL_824853, EPI_ISL_824854, EPI_ISL_824855, EPI_ISL_824856, EPI_ISL_824857, EPI_ISL_824858, EPI_ISL_824859, EPI_ISL_824860, EPI_ISL_824861, EPI_ISL_824862, EPI_ISL_824863, EPI_ISL_824864, EPI_ISL_824865, EPI_ISL_824866, EPI_ISL_824867, EPI_ISL_824868, EPI_ISL_824869, EPI_ISL_824870, EPI_ISL_824871, EPI_ISL_824872, EPI_ISL_824873, EPI_ISL_824874, EPI_ISL_824875, EPI_ISL_824876, EPI_ISL_824877, EPI_ISL_824878, EPI_ISL_824879, EPI_ISL_824880, EPI_ISL_824881, EPI_ISL_824882, EPI_ISL_824883, EPI_ISL_824884, EPI_ISL_824885, EPI_ISL_824886, EPI_ISL_824887, EPI_ISL_824888, EPI_ISL_824889, EPI_ISL_824890, EPI_ISL_824891, EPI_ISL_824892, EPI_ISL_824893, EPI_ISL_824894, EPI_ISL_824895, EPI_ISL_824896, EPI_ISL_824897, EPI_ISL_824898, EPI_ISL_824899, EPI_ISL_824900, EPI_ISL_824901, EPI_ISL_824902, EPI_ISL_824903, EPI_ISL_824904, EPI_ISL_824905, EPI_ISL_824906, EPI_ISL_824907, EPI_ISL_824908, EPI_ISL_824909, EPI_ISL_824910, EPI_ISL_824911, EPI_ISL_824912, EPI_ISL_824913, EPI_ISL_824914, EPI_ISL_824915, EPI_ISL_824916, EPI_ISL_824917, EPI_ISL_824918, EPI_ISL_824919, EPI_ISL_824920, EPI_ISL_824921, EPI_ISL_824922, EPI_ISL_824923, EPI_ISL_824924, EPI_ISL_824925, EPI_ISL_824926, EPI_ISL_824927, EPI_ISL_824928, EPI_ISL_824929, EPI_ISL_824930, EPI_ISL_824931, EPI_ISL_824932, EPI_ISL_824933, EPI_ISL_824934, EPI_ISL_824935, EPI_ISL_824936, EPI_ISL_824937, EPI_ISL_824938, EPI_ISL_824939, EPI_ISL_824940, EPI_ISL_824941, EPI_ISL_824942, EPI_ISL_824943, EPI_ISL_824944, EPI_ISL_824945, EPI_ISL_824946, EPI_ISL_824947, EPI_ISL_824948, EPI_ISL_824949, EPI_ISL_824950, EPI_ISL_824951, EPI_ISL_824952, EPI_ISL_824953, EPI_ISL_824954, EPI_ISL_824955, EPI_ISL_824956, EPI_ISL_824957, EPI_ISL_824958, EPI_ISL_824959, EPI_ISL_824960, EPI_ISL_824961, EPI_ISL_824962, EPI_ISL_824963, EPI_ISL_824964, EPI_ISL_824965, EPI_ISL_824966, EPI_ISL_824967, EPI_ISL_824968, EPI_ISL_824969, EPI_ISL_824970, EPI_ISL_824971, EPI_ISL_824972, EPI_ISL_824973, EPI_ISL_824974, EPI_ISL_824975, EPI_ISL_824976, EPI_ISL_824977, EPI_ISL_824978, EPI_ISL_824979, EPI_ISL_824980, EPI_ISL_824981, EPI_ISL_824982, EPI_ISL_824983, EPI_ISL_824984, EPI_ISL_824985, EPI_ISL_824986, EPI_ISL_824987, EPI_ISL_824988, EPI_ISL_824989, EPI_ISL_824990, EPI_ISL_824991, EPI_ISL_824992, EPI_ISL_824993, EPI_ISL_824994, EPI_ISL_824995, EPI_ISL_824996, EPI_ISL_824997, EPI_ISL_824998, EPI_ISL_824999, EPI_ISL_825000 | Institute of Microbiology, Universidad San Francisco de Quito                                   | Institute of Microbiology, Universidad San Francisco de Quito                                           | Adriana Arnao; Alexandra Noboa; Alexandra Tino; Alvaro Davalos de Castro; Ana Diaz; Andrea Cungan; Andrea Macias; Andres Moreno; Belén Prado-Vivar; Bernardo Gutiérrez; Carla Torres; Carlos Mena; Cristian Pelaez; David Acosta-España; Diana Zambrano; Diego Mora; Diego Moroch; Edgar Espinoza; Edison Chavez; Edmundo Encalada; Eduardo Males; Eulalia Pazmiño; Fabricio Picoita; Fernanda Garcia; Fernando Martinez; Francisco Cordova; Freddy Iza; Fredy Loo; Gabriel Trueba; Hector Moya; Hermelinda Paguay; Jonathan Araujo; Jorge Caamaño; Jorge Montaño; Juan José Guadalupe; Juan Monge; Juan Zuñiga; Katalina Pacheco; Kyllen Briones; Ligia Briceño; Manuel Jaramillo; Manuel Jibaja; Marco Jimenez; Marcos DiStefano; Maribel Cruz; Maureen Mosquera; Michelle Grunauer; Milton Tobar; Monica Becerra-Wong; Nabih Dahik; Nelson Ramacho; Ninfa Hernandez; Pablo Flores; Patricio Reyes; Patricio Rojas-Silva; Paúl Cárdenas; Piedad Villacis; Rosa Avila; Rosario Erazo; Sayra Caiza; Sully Márquez; Tania Guayasamin; Vanesa Ramirez; Veronica Paredes; Verónica Barragán; Viviana Medina |
| see above                                                                                                                                                                                                                                                                                                                                                                                                                                                                                                                                                                                                                                                                                                                                                                                                                                                                                                                                                                                                                                                                                                                                                                                                                                                                                                                                                                                                                                                                                                                                                                                                                                                                                                                                                                                                                                                                                                                                                                                                                                                                                                                                                                                                                                                                                                                                                                                                                                                                                                                                                                                                                                                                                                                                                                                                                                                                                                                                                                                                                                                                                                                                                                                                                                                                                                                                                                                                                                                                                                                                                                                                                                                                                                                                                                                                                                                                                                                                                                                                                                                                                                                                                                                                                                                                                                                                                                                                                                                                                                                                                                                                                                                                                                                                                                                                                                                                                                                                                                                                                                                                                                                                                                                                                                                                                                                                                                                                                                                                                                                                                                                                                                                                                                                                                                                                                                                                                                                                                                                                                                                                                                                                                                                                                                                                                                                                                                                                                                                                                                                                                                                                                                                                                                                                                                                                                                                                                                                                                                                                                                                                                                                                                                                                                                                                                                                                                                                                                                                                                                                                                                                                                                                                                                                                                                                                                                                                                                                                                                                                                                                                                                                                                                                                                                                                                                                                                                                                                                                                                                                                                                                                                                                                                                                                                                                                                                                                                                                                                                                                                                                                                                                                                                                                                                                                                                                                                                                                                                                                                                                                                                                                                                                                                                                                                                                                                                                                                                                                                                                                                                                                                                                                                                                                                                                                                                                                                                                                                                                                                                                                                                                                                                                                                                                                                                                                                                                                                                                                                                                                                                                                                                                                                                                                                                                                                                                                                                                                                                                                                                                                                                                                                                                                                                                                                                                                                                                                                                                                                                                                                                                                                                                                                                                                                                                                                                                                      | Institute of Microbiology, Universidad San Francisco de Quito                                   | Institute of Microbiology, Universidad San Francisco de Quito                                           | Adriana Arnao; Alexandra Noboa; Alexandra Tino; Alvaro Davalos de Castro; Ana Diaz; Andrea Cungan; Andrea Macias; Andres Moreno; Belén Prado-Vivar; Bernardo Gutiérrez; Carla Torres; Carlos Mena; Cristian Pelaez; David Acosta-España; Diana Zambrano; Diego Mora; Diego Moroch; Edgar Espinoza; Edison Chavez; Edmundo Encalada; Eduardo Males; Eulalia Pazmiño; Fabricio Picoita; Fernanda Garcia; Fernando Martinez; Francisco Cordova; Freddy Iza; Fredy Loo; Gabriel Trueba; Hector Moya; Hermelinda Paguay; Jonathan Araujo; Jorge Caamaño; Jorge Montaño; Juan José Guadalupe; Juan Monge; Juan Zuñiga; Katalina Pacheco; Kyllen Briones; Ligia Briceño; Manuel Jaramillo; Manuel Jibaja; Marco Jimenez; Marcos DiStefano; Maribel Cruz; Maureen Mosquera; Michelle Grunauer; Milton Tobar; Monica Becerra-Wong; Nabih Dahik; Nelson Ramacho; Ninfa Hernandez; Pablo Flores; Patricio Reyes; Patricio Rojas-Silva; Paúl Cárdenas; Piedad Villacis; Rosa Avila; Rosario Erazo; Sayra Caiza; Sully Márquez; Tania Guayasamin; Vanesa Ramirez; Veronica Paredes; Verónica Barragán; Viviana Medina |
| EPI_ISL_956312                                                                                                                                                                                                                                                                                                                                                                                                                                                                                                                                                                                                                                                                                                                                                                                                                                                                                                                                                                                                                                                                                                                                                                                                                                                                                                                                                                                                                                                                                                                                                                                                                                                                                                                                                                                                                                                                                                                                                                                                                                                                                                                                                                                                                                                                                                                                                                                                                                                                                                                                                                                                                                                                                                                                                                                                                                                                                                                                                                                                                                                                                                                                                                                                                                                                                                                                                                                                                                                                                                                                                                                                                                                                                                                                                                                                                                                                                                                                                                                                                                                                                                                                                                                                                                                                                                                                                                                                                                                                                                                                                                                                                                                                                                                                                                                                                                                                                                                                                                                                                                                                                                                                                                                                                                                                                                                                                                                                                                                                                                                                                                                                                                                                                                                                                                                                                                                                                                                                                                                                                                                                                                                                                                                                                                                                                                                                                                                                                                                                                                                                                                                                                                                                                                                                                                                                                                                                                                                                                                                                                                                                                                                                                                                                                                                                                                                                                                                                                                                                                                                                                                                                                                                                                                                                                                                                                                                                                                                                                                                                                                                                                                                                                                                                                                                                                                                                                                                                                                                                                                                                                                                                                                                                                                                                                                                                                                                                                                                                                                                                                                                                                                                                                                                                                                                                                                                                                                                                                                                                                                                                                                                                                                                                                                                                                                                                                                                                                                                                                                                                                                                                                                                                                                                                                                                                                                                                                                                                                                                                                                                                                                                                                                                                                                                                                                                                                                                                                                                                                                                                                                                                                                                                                                                                                                                                                                                                                                                                                                                                                                                                                                                                                                                                                                                                                                                                                                                                                                                                                                                                                                                                                                                                                                                                                                                                                                                                 | Institute of Tropical Disease                                                                   | Institute of Tropical Disease, Universitas Airlangga                                                    | Aldise M Nastri; Gatot Soegiarto; Jezzy R Dewantari; Kazufumi Shimizu; Krisnoadi Rahardjo; Laksmi Wulandari; Maria I Lusida; Resti Yudhawati; Rima R Prasetya; Soetjpto; Yasuko Mori                                                                                                                                                                                                                                                                                                                                                                                                                                                                                                                                                                                                                                                                                                                                                                                                                                                                                                                     |
| EPI_ISL_577734, EPI_ISL_577735, EPI_ISL_577738, EPI_ISL_577739, EPI_ISL_718257, EPI_ISL_718259, EPI_ISL_779654, EPI_ISL_779659, EPI_ISL_788987, EPI_ISL_831673, EPI_ISL_875516, EPI_ISL_875531, EPI_ISL_875538, EPI_ISL_903986, EPI_ISL_904003, EPI_ISL_959614, EPI_ISL_959616, EPI_ISL_959617, EPI_ISL_959621, EPI_ISL_959623, EPI_ISL_959636, EPI_ISL_959647                                                                                                                                                                                                                                                                                                                                                                                                                                                                                                                                                                                                                                                                                                                                                                                                                                                                                                                                                                                                                                                                                                                                                                                                                                                                                                                                                                                                                                                                                                                                                                                                                                                                                                                                                                                                                                                                                                                                                                                                                                                                                                                                                                                                                                                                                                                                                                                                                                                                                                                                                                                                                                                                                                                                                                                                                                                                                                                                                                                                                                                                                                                                                                                                                                                                                                                                                                                                                                                                                                                                                                                                                                                                                                                                                                                                                                                                                                                                                                                                                                                                                                                                                                                                                                                                                                                                                                                                                                                                                                                                                                                                                                                                                                                                                                                                                                                                                                                                                                                                                                                                                                                                                                                                                                                                                                                                                                                                                                                                                                                                                                                                                                                                                                                                                                                                                                                                                                                                                                                                                                                                                                                                                                                                                                                                                                                                                                                                                                                                                                                                                                                                                                                                                                                                                                                                                                                                                                                                                                                                                                                                                                                                                                                                                                                                                                                                                                                                                                                                                                                                                                                                                                                                                                                                                                                                                                                                                                                                                                                                                                                                                                                                                                                                                                                                                                                                                                                                                                                                                                                                                                                                                                                                                                                                                                                                                                                                                                                                                                                                                                                                                                                                                                                                                                                                                                                                                                                                                                                                                                                                                                                                                                                                                                                                                                                                                                                                                                                                                                                                                                                                                                                                                                                                                                                                                                                                                                                                                                                                                                                                                                                                                                                                                                                                                                                                                                                                                                                                                                                                                                                                                                                                                                                                                                                                                                                                                                                                                                                                                                                                                                                                                                                                                                                                                                                                                                                                                                                                                                                 | Institute of Virology, Biomedical Research Center of the Slovak Academy of Sciences, Bratislava | Faculty of Natural Sciences, Comenius University, Bratislava                                            | Alena Košalová; Andrej Belák; Boris Klempa; Broa Brejová; Dominika Friová; Edita Staroová; Elena Tichá; Jozef Nosek; Juraj Kopáek; Kristína Boršová; Martina Liková; Martina Neboháová; Monika Slávková; Peter Sabaka; Sabina Fumaová Havlíková; Tomáš Vina; Viktória Hodorová; Viktória abanová; ubomíra Lukáiková                                                                                                                                                                                                                                                                                                                                                                                                                                                                                                                                                                                                                                                                                                                                                                                      |
| see above                                                                                                                                                                                                                                                                                                                                                                                                                                                                                                                                                                                                                                                                                                                                                                                                                                                                                                                                                                                                                                                                                                                                                                                                                                                                                                                                                                                                                                                                                                                                                                                                                                                                                                                                                                                                                                                                                                                                                                                                                                                                                                                                                                                                                                                                                                                                                                                                                                                                                                                                                                                                                                                                                                                                                                                                                                                                                                                                                                                                                                                                                                                                                                                                                                                                                                                                                                                                                                                                                                                                                                                                                                                                                                                                                                                                                                                                                                                                                                                                                                                                                                                                                                                                                                                                                                                                                                                                                                                                                                                                                                                                                                                                                                                                                                                                                                                                                                                                                                                                                                                                                                                                                                                                                                                                                                                                                                                                                                                                                                                                                                                                                                                                                                                                                                                                                                                                                                                                                                                                                                                                                                                                                                                                                                                                                                                                                                                                                                                                                                                                                                                                                                                                                                                                                                                                                                                                                                                                                                                                                                                                                                                                                                                                                                                                                                                                                                                                                                                                                                                                                                                                                                                                                                                                                                                                                                                                                                                                                                                                                                                                                                                                                                                                                                                                                                                                                                                                                                                                                                                                                                                                                                                                                                                                                                                                                                                                                                                                                                                                                                                                                                                                                                                                                                                                                                                                                                                                                                                                                                                                                                                                                                                                                                                                                                                                                                                                                                                                                                                                                                                                                                                                                                                                                                                                                                                                                                                                                                                                                                                                                                                                                                                                                                                                                                                                                                                                                                                                                                                                                                                                                                                                                                                                                                                                                                                                                                                                                                                                                                                                                                                                                                                                                                                                                                                                                                                                                                                                                                                                                                                                                                                                                                                                                                                                                                                                      | Institute of Virology, Biomedical Research Center of the Slovak Academy of Sciences, Bratislava | Faculty of Natural Sciences, Comenius University, Bratislava                                            | Alena Košalová; Andrej Belák; Boris Klempa; Broa Brejová; Dominika Friová; Edita Staroová; Elena Tichá; Jozef Nosek; Juraj Kopáek; Kristína Boršová; Martina Liková; Martina Neboháová; Monika Slávková; Peter Sabaka; Sabina Fumaová Havlíková; Tomáš Vina; Viktória Hodorová; Viktória abanová; ubomíra Lukáiková                                                                                                                                                                                                                                                                                                                                                                                                                                                                                                                                                                                                                                                                                                                                                                                      |
| EPI_ISL_852760, EPI_ISL_893744                                                                                                                                                                                                                                                                                                                                                                                                                                                                                                                                                                                                                                                                                                                                                                                                                                                                                                                                                                                                                                                                                                                                                                                                                                                                                                                                                                                                                                                                                                                                                                                                                                                                                                                                                                                                                                                                                                                                                                                                                                                                                                                                                                                                                                                                                                                                                                                                                                                                                                                                                                                                                                                                                                                                                                                                                                                                                                                                                                                                                                                                                                                                                                                                                                                                                                                                                                                                                                                                                                                                                                                                                                                                                                                                                                                                                                                                                                                                                                                                                                                                                                                                                                                                                                                                                                                                                                                                                                                                                                                                                                                                                                                                                                                                                                                                                                                                                                                                                                                                                                                                                                                                                                                                                                                                                                                                                                                                                                                                                                                                                                                                                                                                                                                                                                                                                                                                                                                                                                                                                                                                                                                                                                                                                                                                                                                                                                                                                                                                                                                                                                                                                                                                                                                                                                                                                                                                                                                                                                                                                                                                                                                                                                                                                                                                                                                                                                                                                                                                                                                                                                                                                                                                                                                                                                                                                                                                                                                                                                                                                                                                                                                                                                                                                                                                                                                                                                                                                                                                                                                                                                                                                                                                                                                                                                                                                                                                                                                                                                                                                                                                                                                                                                                                                                                                                                                                                                                                                                                                                                                                                                                                                                                                                                                                                                                                                                                                                                                                                                                                                                                                                                                                                                                                                                                                                                                                                                                                                                                                                                                                                                                                                                                                                                                                                                                                                                                                                                                                                                                                                                                                                                                                                                                                                                                                                                                                                                                                                                                                                                                                                                                                                                                                                                                                                                                                                                                                                                                                                                                                                                                                                                                                                                                                                                                                                                                 | Institute of Virology, Medical Center, University of Freiburg, Freiburg, Germany                | Institute of Virology, Clinal Virus Genomics, Medical Center, University of Freiburg, Freiburg, Germany | Hajo Grundmann; Jonas Fuchs; Lisa Kern; Marcus Panning; Sandra Reuter                                                                                                                                                                                                                                                                                                                                                                                                                                                                                                                                                                                                                                                                                                                                                                                                                                                                                                                                                                                                                                    |
| EPI_ISL_1017680, EPI_ISL_1017683, EPI_ISL_1017684, EPI_ISL_1017685, EPI_ISL_1017686, EPI_ISL_1017694, EPI_ISL_1017696, EPI_ISL_1017697, EPI_ISL_1017700                                                                                                                                                                                                                                                                                                                                                                                                                                                                                                                                                                                                                                                                                                                                                                                                                                                                                                                                                                                                                                                                                                                                                                                                                                                                                                                                                                                                                                                                                                                                                                                                                                                                                                                                                                                                                                                                                                                                                                                                                                                                                                                                                                                                                                                                                                                                                                                                                                                                                                                                                                                                                                                                                                                                                                                                                                                                                                                                                                                                                                                                                                                                                                                                                                                                                                                                                                                                                                                                                                                                                                                                                                                                                                                                                                                                                                                                                                                                                                                                                                                                                                                                                                                                                                                                                                                                                                                                                                                                                                                                                                                                                                                                                                                                                                                                                                                                                                                                                                                                                                                                                                                                                                                                                                                                                                                                                                                                                                                                                                                                                                                                                                                                                                                                                                                                                                                                                                                                                                                                                                                                                                                                                                                                                                                                                                                                                                                                                                                                                                                                                                                                                                                                                                                                                                                                                                                                                                                                                                                                                                                                                                                                                                                                                                                                                                                                                                                                                                                                                                                                                                                                                                                                                                                                                                                                                                                                                                                                                                                                                                                                                                                                                                                                                                                                                                                                                                                                                                                                                                                                                                                                                                                                                                                                                                                                                                                                                                                                                                                                                                                                                                                                                                                                                                                                                                                                                                                                                                                                                                                                                                                                                                                                                                                                                                                                                                                                                                                                                                                                                                                                                                                                                                                                                                                                                                                                                                                                                                                                                                                                                                                                                                                                                                                                                                                                                                                                                                                                                                                                                                                                                                                                                                                                                                                                                                                                                                                                                                                                                                                                                                                                                                                                                                                                                                                                                                                                                                                                                                                                                                                                                                                                                                                        | Institute of Virology, Vaccines and Sera "Torlak"                                               | Institute of microbiology and Immunology, Faculty of Medicine, University of Belgrade                   | Jankovic, M.; Jovanovic, T.; Knezevic, A.; Milicevic, O.; Sekler, M.; Tesovic, B.; Vidanovic, D.                                                                                                                                                                                                                                                                                                                                                                                                                                                                                                                                                                                                                                                                                                                                                                                                                                                                                                                                                                                                         |
| see above                                                                                                                                                                                                                                                                                                                                                                                                                                                                                                                                                                                                                                                                                                                                                                                                                                                                                                                                                                                                                                                                                                                                                                                                                                                                                                                                                                                                                                                                                                                                                                                                                                                                                                                                                                                                                                                                                                                                                                                                                                                                                                                                                                                                                                                                                                                                                                                                                                                                                                                                                                                                                                                                                                                                                                                                                                                                                                                                                                                                                                                                                                                                                                                                                                                                                                                                                                                                                                                                                                                                                                                                                                                                                                                                                                                                                                                                                                                                                                                                                                                                                                                                                                                                                                                                                                                                                                                                                                                                                                                                                                                                                                                                                                                                                                                                                                                                                                                                                                                                                                                                                                                                                                                                                                                                                                                                                                                                                                                                                                                                                                                                                                                                                                                                                                                                                                                                                                                                                                                                                                                                                                                                                                                                                                                                                                                                                                                                                                                                                                                                                                                                                                                                                                                                                                                                                                                                                                                                                                                                                                                                                                                                                                                                                                                                                                                                                                                                                                                                                                                                                                                                                                                                                                                                                                                                                                                                                                                                                                                                                                                                                                                                                                                                                                                                                                                                                                                                                                                                                                                                                                                                                                                                                                                                                                                                                                                                                                                                                                                                                                                                                                                                                                                                                                                                                                                                                                                                                                                                                                                                                                                                                                                                                                                                                                                                                                                                                                                                                                                                                                                                                                                                                                                                                                                                                                                                                                                                                                                                                                                                                                                                                                                                                                                                                                                                                                                                                                                                                                                                                                                                                                                                                                                                                                                                                                                                                                                                                                                                                                                                                                                                                                                                                                                                                                                                                                                                                                                                                                                                                                                                                                                                                                                                                                                                                                                                      | Institute of Virology, Vaccines and Sera "Torlak"                                               | Institute of microbiology and Immunology, Faculty of Medicine, University of Belgrade                   | Jankovic, M.; Jovanovic, T.; Knezevic, A.; Milicevic, O.; Sekler, M.; Tesovic, B.; Vidanovic, D.                                                                                                                                                                                                                                                                                                                                                                                                                                                                                                                                                                                                                                                                                                                                                                                                                                                                                                                                                                                                         |
| EPI_ISL_755653, EPI_ISL_776751, EPI_ISL_833161                                                                                                                                                                                                                                                                                                                                                                                                                                                                                                                                                                                                                                                                                                                                                                                                                                                                                                                                                                                                                                                                                                                                                                                                                                                                                                                                                                                                                                                                                                                                                                                                                                                                                                                                                                                                                                                                                                                                                                                                                                                                                                                                                                                                                                                                                                                                                                                                                                                                                                                                                                                                                                                                                                                                                                                                                                                                                                                                                                                                                                                                                                                                                                                                                                                                                                                                                                                                                                                                                                                                                                                                                                                                                                                                                                                                                                                                                                                                                                                                                                                                                                                                                                                                                                                                                                                                                                                                                                                                                                                                                                                                                                                                                                                                                                                                                                                                                                                                                                                                                                                                                                                                                                                                                                                                                                                                                                                                                                                                                                                                                                                                                                                                                                                                                                                                                                                                                                                                                                                                                                                                                                                                                                                                                                                                                                                                                                                                                                                                                                                                                                                                                                                                                                                                                                                                                                                                                                                                                                                                                                                                                                                                                                                                                                                                                                                                                                                                                                                                                                                                                                                                                                                                                                                                                                                                                                                                                                                                                                                                                                                                                                                                                                                                                                                                                                                                                                                                                                                                                                                                                                                                                                                                                                                                                                                                                                                                                                                                                                                                                                                                                                                                                                                                                                                                                                                                                                                                                                                                                                                                                                                                                                                                                                                                                                                                                                                                                                                                                                                                                                                                                                                                                                                                                                                                                                                                                                                                                                                                                                                                                                                                                                                                                                                                                                                                                                                                                                                                                                                                                                                                                                                                                                                                                                                                                                                                                                                                                                                                                                                                                                                                                                                                                                                                                                                                                                                                                                                                                                                                                                                                                                                                                                                                                                                                                                 | Instituto Adolfo Lutz - Central                                                                 | Instituto Adolfo Lutz, Interdisciplinary Procedures Center, Strategic Laboratory                        | Claudia Regina Gonçalves; Claudio Tavares Sacchi; Erica Valessa Ramos Gomes; Karoline Rodrigues Campos                                                                                                                                                                                                                                                                                                                                                                                                                                                                                                                                                                                                                                                                                                                                                                                                                                                                                                                                                                                                   |
| EPI_ISL_776769                                                                                                                                                                                                                                                                                                                                                                                                                                                                                                                                                                                                                                                                                                                                                                                                                                                                                                                                                                                                                                                                                                                                                                                                                                                                                                                                                                                                                                                                                                                                                                                                                                                                                                                                                                                                                                                                                                                                                                                                                                                                                                                                                                                                                                                                                                                                                                                                                                                                                                                                                                                                                                                                                                                                                                                                                                                                                                                                                                                                                                                                                                                                                                                                                                                                                                                                                                                                                                                                                                                                                                                                                                                                                                                                                                                                                                                                                                                                                                                                                                                                                                                                                                                                                                                                                                                                                                                                                                                                                                                                                                                                                                                                                                                                                                                                                                                                                                                                                                                                                                                                                                                                                                                                                                                                                                                                                                                                                                                                                                                                                                                                                                                                                                                                                                                                                                                                                                                                                                                                                                                                                                                                                                                                                                                                                                                                                                                                                                                                                                                                                                                                                                                                                                                                                                                                                                                                                                                                                                                                                                                                                                                                                                                                                                                                                                                                                                                                                                                                                                                                                                                                                                                                                                                                                                                                                                                                                                                                                                                                                                                                                                                                                                                                                                                                                                                                                                                                                                                                                                                                                                                                                                                                                                                                                                                                                                                                                                                                                                                                                                                                                                                                                                                                                                                                                                                                                                                                                                                                                                                                                                                                                                                                                                                                                                                                                                                                                                                                                                                                                                                                                                                                                                                                                                                                                                                                                                                                                                                                                                                                                                                                                                                                                                                                                                                                                                                                                                                                                                                                                                                                                                                                                                                                                                                                                                                                                                                                                                                                                                                                                                                                                                                                                                                                                                                                                                                                                                                                                                                                                                                                                                                                                                                                                                                                                                                                 | Instituto Adolfo Lutz - Regional de Santo Andre                                                 | Instituto Adolfo Lutz, Interdisciplinary Procedures Center, Strategic Laboratory                        | Claudia Regina Gonçalves; Claudio Tavares Sacchi; Erica Valessa Ramos Gomes; Karoline Rodrigues Campos                                                                                                                                                                                                                                                                                                                                                                                                                                                                                                                                                                                                                                                                                                                                                                                                                                                                                                                                                                                                   |
| EPI_ISL_755650, EPI_ISL_861679                                                                                                                                                                                                                                                                                                                                                                                                                                                                                                                                                                                                                                                                                                                                                                                                                                                                                                                                                                                                                                                                                                                                                                                                                                                                                                                                                                                                                                                                                                                                                                                                                                                                                                                                                                                                                                                                                                                                                                                                                                                                                                                                                                                                                                                                                                                                                                                                                                                                                                                                                                                                                                                                                                                                                                                                                                                                                                                                                                                                                                                                                                                                                                                                                                                                                                                                                                                                                                                                                                                                                                                                                                                                                                                                                                                                                                                                                                                                                                                                                                                                                                                                                                                                                                                                                                                                                                                                                                                                                                                                                                                                                                                                                                                                                                                                                                                                                                                                                                                                                                                                                                                                                                                                                                                                                                                                                                                                                                                                                                                                                                                                                                                                                                                                                                                                                                                                                                                                                                                                                                                                                                                                                                                                                                                                                                                                                                                                                                                                                                                                                                                                                                                                                                                                                                                                                                                                                                                                                                                                                                                                                                                                                                                                                                                                                                                                                                                                                                                                                                                                                                                                                                                                                                                                                                                                                                                                                                                                                                                                                                                                                                                                                                                                                                                                                                                                                                                                                                                                                                                                                                                                                                                                                                                                                                                                                                                                                                                                                                                                                                                                                                                                                                                                                                                                                                                                                                                                                                                                                                                                                                                                                                                                                                                                                                                                                                                                                                                                                                                                                                                                                                                                                                                                                                                                                                                                                                                                                                                                                                                                                                                                                                                                                                                                                                                                                                                                                                                                                                                                                                                                                                                                                                                                                                                                                                                                                                                                                                                                                                                                                                                                                                                                                                                                                                                                                                                                                                                                                                                                                                                                                                                                                                                                                                                                                                                 | Instituto Adolfo Lutz - Regional de Taubate                                                     | Instituto Adolfo Lutz, Interdisciplinary Procedures Center, Strategic Laboratory                        | Claudia Regina Gonçalves; Claudio Tavares Sacchi; Erica Valessa Ramos Gomes; Karoline Rodrigues Campos                                                                                                                                                                                                                                                                                                                                                                                                                                                                                                                                                                                                                                                                                                                                                                                                                                                                                                                                                                                                   |
| EPI_ISL_491945, EPI_ISL_491950                                                                                                                                                                                                                                                                                                                                                                                                                                                                                                                                                                                                                                                                                                                                                                                                                                                                                                                                                                                                                                                                                                                                                                                                                                                                                                                                                                                                                                                                                                                                                                                                                                                                                                                                                                                                                                                                                                                                                                                                                                                                                                                                                                                                                                                                                                                                                                                                                                                                                                                                                                                                                                                                                                                                                                                                                                                                                                                                                                                                                                                                                                                                                                                                                                                                                                                                                                                                                                                                                                                                                                                                                                                                                                                                                                                                                                                                                                                                                                                                                                                                                                                                                                                                                                                                                                                                                                                                                                                                                                                                                                                                                                                                                                                                                                                                                                                                                                                                                                                                                                                                                                                                                                                                                                                                                                                                                                                                                                                                                                                                                                                                                                                                                                                                                                                                                                                                                                                                                                                                                                                                                                                                                                                                                                                                                                                                                                                                                                                                                                                                                                                                                                                                                                                                                                                                                                                                                                                                                                                                                                                                                                                                                                                                                                                                                                                                                                                                                                                                                                                                                                                                                                                                                                                                                                                                                                                                                                                                                                                                                                                                                                                                                                                                                                                                                                                                                                                                                                                                                                                                                                                                                                                                                                                                                                                                                                                                                                                                                                                                                                                                                                                                                                                                                                                                                                                                                                                                                                                                                                                                                                                                                                                                                                                                                                                                                                                                                                                                                                                                                                                                                                                                                                                                                                                                                                                                                                                                                                                                                                                                                                                                                                                                                                                                                                                                                                                                                                                                                                                                                                                                                                                                                                                                                                                                                                                                                                                                                                                                                                                                                                                                                                                                                                                                                                                                                                                                                                                                                                                                                                                                                                                                                                                                                                                                                                                 | Instituto Nacional de Investigación en Salud Pública - INSPI                                    | INSPI - Charité                                                                                         | Alberto Orlando; Alexandra Usiña; Alfredo Bruno Caicedo; Andres Moreira-Soto; Anna-Lena Sander; Denisses Portugal; Domenica de Mora Coloma; Jan Felix Drexler; Juan Carlos Zeballos; Manuel Gonzalez; Maritza Olmedo; Nina Krause; Silvia Salgado                                                                                                                                                                                                                                                                                                                                                                                                                                                                                                                                                                                                                                                                                                                                                                                                                                                        |
| EPI_ISL_955194, EPI_ISL_1005575                                                                                                                                                                                                                                                                                                                                                                                                                                                                                                                                                                                                                                                                                                                                                                                                                                                                                                                                                                                                                                                                                                                                                                                                                                                                                                                                                                                                                                                                                                                                                                                                                                                                                                                                                                                                                                                                                                                                                                                                                                                                                                                                                                                                                                                                                                                                                                                                                                                                                                                                                                                                                                                                                                                                                                                                                                                                                                                                                                                                                                                                                                                                                                                                                                                                                                                                                                                                                                                                                                                                                                                                                                                                                                                                                                                                                                                                                                                                                                                                                                                                                                                                                                                                                                                                                                                                                                                                                                                                                                                                                                                                                                                                                                                                                                                                                                                                                                                                                                                                                                                                                                                                                                                                                                                                                                                                                                                                                                                                                                                                                                                                                                                                                                                                                                                                                                                                                                                                                                                                                                                                                                                                                                                                                                                                                                                                                                                                                                                                                                                                                                                                                                                                                                                                                                                                                                                                                                                                                                                                                                                                                                                                                                                                                                                                                                                                                                                                                                                                                                                                                                                                                                                                                                                                                                                                                                                                                                                                                                                                                                                                                                                                                                                                                                                                                                                                                                                                                                                                                                                                                                                                                                                                                                                                                                                                                                                                                                                                                                                                                                                                                                                                                                                                                                                                                                                                                                                                                                                                                                                                                                                                                                                                                                                                                                                                                                                                                                                                                                                                                                                                                                                                                                                                                                                                                                                                                                                                                                                                                                                                                                                                                                                                                                                                                                                                                                                                                                                                                                                                                                                                                                                                                                                                                                                                                                                                                                                                                                                                                                                                                                                                                                                                                                                                                                                                                                                                                                                                                                                                                                                                                                                                                                                                                                                                                                                | Instituto Nacional de Medicina Genomica                                                         | Instituto Nacional de Medicina Genomica                                                                 | Cedro-Tanda A; Cisneros-Villanueva M; Herrera-Montalvo LA; Hidalgo-Miranda A; Mendoza-Vargas A; Peñaloza-Figueroa F; Reyes-Grajeda JP                                                                                                                                                                                                                                                                                                                                                                                                                                                                                                                                                                                                                                                                                                                                                                                                                                                                                                                                                                    |
| EPI_ISL_536489, EPI_ISL_536491, EPI_ISL_536500, EPI_ISL_536531                                                                                                                                                                                                                                                                                                                                                                                                                                                                                                                                                                                                                                                                                                                                                                                                                                                                                                                                                                                                                                                                                                                                                                                                                                                                                                                                                                                                                                                                                                                                                                                                                                                                                                                                                                                                                                                                                                                                                                                                                                                                                                                                                                                                                                                                                                                                                                                                                                                                                                                                                                                                                                                                                                                                                                                                                                                                                                                                                                                                                                                                                                                                                                                                                                                                                                                                                                                                                                                                                                                                                                                                                                                                                                                                                                                                                                                                                                                                                                                                                                                                                                                                                                                                                                                                                                                                                                                                                                                                                                                                                                                                                                                                                                                                                                                                                                                                                                                                                                                                                                                                                                                                                                                                                                                                                                                                                                                                                                                                                                                                                                                                                                                                                                                                                                                                                                                                                                                                                                                                                                                                                                                                                                                                                                                                                                                                                                                                                                                                                                                                                                                                                                                                                                                                                                                                                                                                                                                                                                                                                                                                                                                                                                                                                                                                                                                                                                                                                                                                                                                                                                                                                                                                                                                                                                                                                                                                                                                                                                                                                                                                                                                                                                                                                                                                                                                                                                                                                                                                                                                                                                                                                                                                                                                                                                                                                                                                                                                                                                                                                                                                                                                                                                                                                                                                                                                                                                                                                                                                                                                                                                                                                                                                                                                                                                                                                                                                                                                                                                                                                                                                                                                                                                                                                                                                                                                                                                                                                                                                                                                                                                                                                                                                                                                                                                                                                                                                                                                                                                                                                                                                                                                                                                                                                                                                                                                                                                                                                                                                                                                                                                                                                                                                                                                                                                                                                                                                                                                                                                                                                                                                                                                                                                                                                                                                                 | Instituto Nacional de Salud                                                                     | Laboratorio de Infecciones Respiratorias Agudas                                                         | David Tarazona; Dennis Carhuarica; Eduardo Juscamayta Lopez; Faviola Valdivia Guerrero; Lenin Maturano Hernandez; Nancy Rojas Serrano; Ronnie Gavilan Chavez                                                                                                                                                                                                                                                                                                                                                                                                                                                                                                                                                                                                                                                                                                                                                                                                                                                                                                                                             |
| EPI_ISL_791084, EPI_ISL_791086, EPI_ISL_791087, EPI_ISL_791088, EPI_ISL_791093, EPI_ISL_791094, EPI_ISL_791096                                                                                                                                                                                                                                                                                                                                                                                                                                                                                                                                                                                                                                                                                                                                                                                                                                                                                                                                                                                                                                                                                                                                                                                                                                                                                                                                                                                                                                                                                                                                                                                                                                                                                                                                                                                                                                                                                                                                                                                                                                                                                                                                                                                                                                                                                                                                                                                                                                                                                                                                                                                                                                                                                                                                                                                                                                                                                                                                                                                                                                                                                                                                                                                                                                                                                                                                                                                                                                                                                                                                                                                                                                                                                                                                                                                                                                                                                                                                                                                                                                                                                                                                                                                                                                                                                                                                                                                                                                                                                                                                                                                                                                                                                                                                                                                                                                                                                                                                                                                                                                                                                                                                                                                                                                                                                                                                                                                                                                                                                                                                                                                                                                                                                                                                                                                                                                                                                                                                                                                                                                                                                                                                                                                                                                                                                                                                                                                                                                                                                                                                                                                                                                                                                                                                                                                                                                                                                                                                                                                                                                                                                                                                                                                                                                                                                                                                                                                                                                                                                                                                                                                                                                                                                                                                                                                                                                                                                                                                                                                                                                                                                                                                                                                                                                                                                                                                                                                                                                                                                                                                                                                                                                                                                                                                                                                                                                                                                                                                                                                                                                                                                                                                                                                                                                                                                                                                                                                                                                                                                                                                                                                                                                                                                                                                                                                                                                                                                                                                                                                                                                                                                                                                                                                                                                                                                                                                                                                                                                                                                                                                                                                                                                                                                                                                                                                                                                                                                                                                                                                                                                                                                                                                                                                                                                                                                                                                                                                                                                                                                                                                                                                                                                                                                                                                                                                                                                                                                                                                                                                                                                                                                                                                                                                                                                 | Instituto Nacional de Salud - Unidad de Secuenciación y Análisis Genómico                       | Instituto Nacional de Salud - Dirección de Investigación en Salud Pública                               | Carlos Franco-Muñoz                                                                                                                                                                                                                                                                                                                                                                                                                                                                                                                                                                                                                                                                                                                                                                                                                                                                                                                                                                                                                                                                                      |

|                                                                                                                                                                                                                                                                                                                                                                                                                                                                                                                                                                                                                                                                                                                                                                                                                                                   |           |                                                                                                                                                                                                                           |                                                                                                                                                                                            |                                                                                                                                                                                                                                                                                                                                                                                                                                                                                                                                                                                                                                                     |
|---------------------------------------------------------------------------------------------------------------------------------------------------------------------------------------------------------------------------------------------------------------------------------------------------------------------------------------------------------------------------------------------------------------------------------------------------------------------------------------------------------------------------------------------------------------------------------------------------------------------------------------------------------------------------------------------------------------------------------------------------------------------------------------------------------------------------------------------------|-----------|---------------------------------------------------------------------------------------------------------------------------------------------------------------------------------------------------------------------------|--------------------------------------------------------------------------------------------------------------------------------------------------------------------------------------------|-----------------------------------------------------------------------------------------------------------------------------------------------------------------------------------------------------------------------------------------------------------------------------------------------------------------------------------------------------------------------------------------------------------------------------------------------------------------------------------------------------------------------------------------------------------------------------------------------------------------------------------------------------|
| EPI_ISL_732134, EPI_ISL_732244, EPI_ISL_941648, EPI_ISL_941676, EPI_ISL_941719, EPI_ISL_941859, EPI_ISL_1117321                                                                                                                                                                                                                                                                                                                                                                                                                                                                                                                                                                                                                                                                                                                                   | see above | Instituto Nacional de Saude (INSA) and Instituto Gulbenkian de Ciencia (IGC)                                                                                                                                              | Instituto Nacional de Saude (INSA) and Instituto Gulbenkian de Ciencia (IGC)                                                                                                               | Borges et al                                                                                                                                                                                                                                                                                                                                                                                                                                                                                                                                                                                                                                        |
| EPI_ISL_492036, EPI_ISL_492040                                                                                                                                                                                                                                                                                                                                                                                                                                                                                                                                                                                                                                                                                                                                                                                                                    |           | Instituto de Biologia do Exército                                                                                                                                                                                         | Laboratório Metabolismo Macromolecular FirminoTorres de Castro, Instituto de Biofísica Carlos Chagas Filho, Universidade Federal do Rio de Janeiro                                         | Aline Rosa Vianna de Souza; Bianca Catarina Azevedo Cabral; Caleb GM Santos; Clarissa Damaso; Elizabeth Valentin; Marcio da Costa Cipitelli; Marcos Dornelas-Ribeiro; Nádia Vaez Gonçalves da Cruz; Rodrigo Soares de Moura Neto; Rosane Silva; Tatiana LS Nogueira; Virginia Sara Grancieri do Amaral                                                                                                                                                                                                                                                                                                                                              |
| EPI_ISL_493335, EPI_ISL_493339, EPI_ISL_493342, EPI_ISL_493344, EPI_ISL_493348, EPI_ISL_516623, EPI_ISL_576258, EPI_ISL_576266, EPI_ISL_576267, EPI_ISL_576269, EPI_ISL_658870, EPI_ISL_658883, EPI_ISL_658886, EPI_ISL_658893, EPI_ISL_658901, EPI_ISL_872089, EPI_ISL_872097                                                                                                                                                                                                                                                                                                                                                                                                                                                                                                                                                                    | see above | Instituto de Diagnostico y Referencia Epidemiologicos (INDRE)                                                                                                                                                             | Instituto de Diagnostico y Referencia Epidemiologicos (INDRE)                                                                                                                              | Abril Rodriguez-Maldonado; Adnan Araiza-Rodríguez; Adnan-Araiza Rodríguez; Claudia Wong-Arambula; Dayanira Arellano-Suarez; Edgar Mendieta-Condado; Ernesto Ramirez-Gonzalez; Ernesto Ramirez-Gonzalez.; Fabiola Garcés-Ayala; Gisela Barrera-Badillo.; Irma Lopez-Martinez; Lucia Hernandez-Rivas; Natividad Cruz-Ortiz; Tatiana Nunez-Garcia                                                                                                                                                                                                                                                                                                      |
| EPI_ISL_660068                                                                                                                                                                                                                                                                                                                                                                                                                                                                                                                                                                                                                                                                                                                                                                                                                                    |           | Instituto de Diagnostico y Referencia Epidemiologicos (INDRE)                                                                                                                                                             | Instituto de diagnóstico y Referencia Epidemiologicos (INDRE) Departamento de Virología                                                                                                    | Abril Rodriguez-Maldonado; Claudia Wong-Arambula; Dayanira Arellano-Suarez; Ernesto Ramirez-Gonzalez.; Fabiola Garcés-Ayala; Gisela Barrera-Badillo; Irma Lopez-Martinez; Lucia Hernandez-Rivas; Natividad Cruz-Ortiz; Tatiana Nunez-Garcia                                                                                                                                                                                                                                                                                                                                                                                                         |
| EPI_ISL_1060678, EPI_ISL_1060680, EPI_ISL_1060682, EPI_ISL_1060684, EPI_ISL_1060686, EPI_ISL_1060689, EPI_ISL_1060692, EPI_ISL_1060693, EPI_ISL_1060694, EPI_ISL_1060697, EPI_ISL_1060701, EPI_ISL_1060704, EPI_ISL_1060707, EPI_ISL_1060709, EPI_ISL_1060718, EPI_ISL_1060722, EPI_ISL_1060724, EPI_ISL_1060727, EPI_ISL_1060728, EPI_ISL_1060745, EPI_ISL_1060746                                                                                                                                                                                                                                                                                                                                                                                                                                                                               | see above | Instituto de Diagnostico y Referencia Epidemiologicos (INDRE)_RNLS                                                                                                                                                        | Instituto de Diagnostico y Referencia Epidemiologicos (INDRE)                                                                                                                              | Abril Rodriguez-Maldonado; Adnan Araiza-Rodríguez; Claudia Wong-Arambula; David Fragoso-Fonseca; Ernesto Ramirez-Gonzalez.; Fabiola Garcés-Ayala; Gisela Barrera-Badillo; Irma Lopez-Martinez; Lucia Hernandez-Rivas; Mayra Jimenez-Morales; Nancy Munoz-Hernandez; Natividad Cruz-Ortiz; Sergio Rangel-Guerrero; Tatiana Nunez-Garcia                                                                                                                                                                                                                                                                                                              |
| EPI_ISL_913913, EPI_ISL_913915, EPI_ISL_913919, EPI_ISL_913921, EPI_ISL_913925, EPI_ISL_913926, EPI_ISL_913934, EPI_ISL_913936, EPI_ISL_913938, EPI_ISL_913939, EPI_ISL_913940, EPI_ISL_913950, EPI_ISL_913955, EPI_ISL_913956, EPI_ISL_913958, EPI_ISL_913959, EPI_ISL_913961, EPI_ISL_913963, EPI_ISL_913966, EPI_ISL_913969, EPI_ISL_913970, EPI_ISL_913971, EPI_ISL_913973, EPI_ISL_913976, EPI_ISL_913981, EPI_ISL_913982, EPI_ISL_913983, EPI_ISL_933668, EPI_ISL_933700, EPI_ISL_933701, EPI_ISL_933703, EPI_ISL_933708, EPI_ISL_1054969, EPI_ISL_1054980                                                                                                                                                                                                                                                                                  | see above | Instituto de Diagnostico y Referencia Epidemiologicos INDRE_RNLS                                                                                                                                                          | Instituto de Diagnostico y Referencia Epidemiologicos (INDRE)                                                                                                                              | Abril Rodriguez-Maldonado; Adnan Araiza-Rodríguez; Claudia Wong-Arambula; David Fragoso-Fonseca; Ernesto Ramirez-Gonzalez.; Fabiola Garcés-Ayala; Gisela Barrera-Badillo; Irma Lopez-Martinez; Lucia Hernandez-Rivas; Mayra Jimenez-Morales; Nancy Munoz-Hernandez; Natividad Cruz-Ortiz; Sergio Rangel-Guerrero; Tatiana Nunez-Garcia                                                                                                                                                                                                                                                                                                              |
| EPI_ISL_747615, EPI_ISL_748138, EPI_ISL_748140, EPI_ISL_748143                                                                                                                                                                                                                                                                                                                                                                                                                                                                                                                                                                                                                                                                                                                                                                                    |           | Instituto de Investigaciones Biologicas Clemente Estable                                                                                                                                                                  | Institut Pasteur de Montevideo                                                                                                                                                             | Ana Carolina Mendonça; Andres Lizasoain; Camila Simoes; Cecilia Alonso; Cecilia Salazar; Daiana Mir; Fernando Lopez-Tort; Fernando Motta; Gonzalo Bello; Ighor Arantes; Ignacio Ferrés; Jose Sotelo; Leticia Maya; Leticia Garay Martins; Luciana Appolinario; Lucia Spangenberg; Mailen Arleo; Mariana Brandes; Marilda Mendonça Siqueira; Marilda Tereza Mar da Rosa; Maria Jose Benitez-Galeano; Martin Graña; Matias Castells; Matias Victoria; Matias Salvo; Natalia Rego; Natalia Reyes; Pablo Smircich; Paola Cristina Resende; Rodney Colina; Tamara Fernandez-Calero; Tania Possi; Tatiana Schäffer Gregianini; Veronica Noya; Yasser Vega |
| EPI_ISL_510066                                                                                                                                                                                                                                                                                                                                                                                                                                                                                                                                                                                                                                                                                                                                                                                                                                    |           | Instituto de Investigaciones Biomédicas de Barcelona (CSIC), Hospital Clinic i Provincial de Barcelona, Instituto de Biomedicina de Valencia (CSIC), Hospital de Sant Pau                                                 | SeqCOVID-SPAIN consortium/IBV(CSIC)                                                                                                                                                        | Alex Soriano; Andrea Vergara; Anna M. Planas; Israel Fernández Cadenas and SeqCOVID-SPAIN consortium; Jordi Pérez Tur; Miguel J. Martínez; M <sup>9</sup> Angeles Marcos                                                                                                                                                                                                                                                                                                                                                                                                                                                                            |
| EPI_ISL_729910                                                                                                                                                                                                                                                                                                                                                                                                                                                                                                                                                                                                                                                                                                                                                                                                                                    |           | Instituto de Medicina Tropical, Universidad Nacional Toribio Rodríguez de Mendoza de Amazonas                                                                                                                             | Laboratorio de Genómica Microbiana, Universidad Peruana Cayetano Heredia                                                                                                                   | Alejandra Dávila-Barclay; Brenda Ayzanoa; Carla Montenegro; Cecilia Pajuelo; Janet Huancachoque; Luis González; Pablo Tsukayama; Pedro E. Romero; Pool Marcos; Rafael Tapia; Stella Chenet                                                                                                                                                                                                                                                                                                                                                                                                                                                          |
| EPI_ISL_836978                                                                                                                                                                                                                                                                                                                                                                                                                                                                                                                                                                                                                                                                                                                                                                                                                                    |           | Irmandade da Santa Casa de Misericórdia de Lorena                                                                                                                                                                         | Instituto Adolfo Lutz, Interdisciplinary Procedures Center, Strategic Laboratory                                                                                                           | Claudia Regina Gonçalves; Claudio Tavares Sacchi; Erica Valessa Ramos Gomes; Karoline Rodrigues Campos                                                                                                                                                                                                                                                                                                                                                                                                                                                                                                                                              |
| EPI_ISL_956392                                                                                                                                                                                                                                                                                                                                                                                                                                                                                                                                                                                                                                                                                                                                                                                                                                    |           | Isolation - Virology Unit, Institut Pasteur du Cambodge; Sequencing - US National Institute of Allergy and Infectious Diseases Cambodia, US Naval Medical Research Unit -2, Cambodia National Institute for Public Health | Virology Unit, Institut Pasteur du Cambodge                                                                                                                                                | Chau Darapheak; Chin Savuth; Erik A Karlsson; Jennifer Bohl; Jessica Manning; Jose A Garcia-Rivera; Kraing Sidonn; Ly Sovann; Sophana Chea; Sreyngim Lay; Veasna Duong; Vireak Heang; Yi Sengdoeurn                                                                                                                                                                                                                                                                                                                                                                                                                                                 |
| EPI_ISL_516907, EPI_ISL_575332, EPI_ISL_649094                                                                                                                                                                                                                                                                                                                                                                                                                                                                                                                                                                                                                                                                                                                                                                                                    |           | Israel Central Virology laboratory                                                                                                                                                                                        | Israel Central Virology laboratory                                                                                                                                                         | Efrat Dahan Bucris; Ella Mendelson; Michal Mandelboim; Neta Zuckerman; Oran Erster                                                                                                                                                                                                                                                                                                                                                                                                                                                                                                                                                                  |
| EPI_ISL_804075, EPI_ISL_804129, EPI_ISL_804201, EPI_ISL_889051, EPI_ISL_889141, EPI_ISL_889144, EPI_ISL_889165, EPI_ISL_889251, EPI_ISL_944464, EPI_ISL_944530, EPI_ISL_1073469, EPI_ISL_1073598, EPI_ISL_1073616, EPI_ISL_1073617                                                                                                                                                                                                                                                                                                                                                                                                                                                                                                                                                                                                                | see above | Israel Central Virology laboratory                                                                                                                                                                                        | Israel National Consortium for SARS-CoV-2 sequencing                                                                                                                                       | Assaf Rokney; Dana Bar-Ilan; David A. Zeevi; Efrat Dahan Bucris; Efrat Glick-Saar; Efrat Roman; Ella Mendelson; Ephraim Fass; Eva Nachum; Gal Zizelski Valenci; Gideon Rechavi; Israel Nissari; Joseph Jaffe; Maya Davidovich Cohen; Michal Mandelboim; Mor Rubinstein; Neta Zuckerman; Omer Murik; Omri Nayshool; Oran Erster; Orna Mor; Tzvia Mann                                                                                                                                                                                                                                                                                                |
| EPI_ISL_778765, EPI_ISL_833527, EPI_ISL_837488, EPI_ISL_960443, EPI_ISL_960594, EPI_ISL_960646                                                                                                                                                                                                                                                                                                                                                                                                                                                                                                                                                                                                                                                                                                                                                    |           | Istituto Zooprofilattico Sperimentale del Mezzogiorno                                                                                                                                                                     | TIGEM                                                                                                                                                                                      | Andrea Ballabio; Anna Manfredi; Antonio Grimaldi; Antonio Limone; Biancamaria Pierri; Chiara Colantuono; Davide Cacchiarelli.; Denise Di Concilio; Francesco Panariello; Lucio Di Filippo; Marcello Salvi; Maria Concetta Cuomo; Patrizia Annunziata; Pellegrino Cerino; Valentina Bouche                                                                                                                                                                                                                                                                                                                                                           |
| EPI_ISL_722892, EPI_ISL_794813                                                                                                                                                                                                                                                                                                                                                                                                                                                                                                                                                                                                                                                                                                                                                                                                                    |           | Istituto Zooprofilattico Sperimentale della Puglia e della Basilicata                                                                                                                                                     | Istituto Zooprofilattico Sperimentale della Puglia e della Basilicata                                                                                                                      | Bianco A.; Capozzi L.; Cipolletta D.; Del Sambio L.; Galante D.; Manzulli V; Pace L.; Parisi A.; Rondinone V.                                                                                                                                                                                                                                                                                                                                                                                                                                                                                                                                       |
| EPI_ISL_450793                                                                                                                                                                                                                                                                                                                                                                                                                                                                                                                                                                                                                                                                                                                                                                                                                                    |           | Jamaica Ministry of Health and Wellness                                                                                                                                                                                   | Pathogen Discovery, Respiratory Viruses Branch, Division of Viral Diseases, Centers for Disease Control and Prevention                                                                     | Anna Montmayeur; Anna Uehara; Bettina Bankamp; Clinton R. Paden; Haibin Wang; Jing Zhang; Krista Queen; Rachel Marine; Suxiang Tong; Yan Li; Ying Tao; Zachary Weiner                                                                                                                                                                                                                                                                                                                                                                                                                                                                               |
| EPI_ISL_779257, EPI_ISL_779260, EPI_ISL_779266, EPI_ISL_779276, EPI_ISL_779289                                                                                                                                                                                                                                                                                                                                                                                                                                                                                                                                                                                                                                                                                                                                                                    |           | Jamil-ur-Rahman Center for Genome Research, Dr. Panjwani Center for Molecular Medicine and Drug Research                                                                                                                  | Jamil-ur-Rahman Center for Genome Research, Dr. Panjwani Center for Molecular Medicine and Drug Research                                                                                   | Ansari, S.; Irfan, M.; Khan, I.; Nisa, Z.; Rashid, M.; Shakeel, M.                                                                                                                                                                                                                                                                                                                                                                                                                                                                                                                                                                                  |
| EPI_ISL_451958                                                                                                                                                                                                                                                                                                                                                                                                                                                                                                                                                                                                                                                                                                                                                                                                                                    |           | Jamil-ur-Rahman Center for Genome Research, Dr. Panjwani Center for Molecular Medicine and Drug Research, International Center for Chemical and Biological Sciences, University of Karachi                                | Jamil-ur-Rahman Center for Genome Research, Dr. Panjwani Center for Molecular Medicine and Drug Research, International Center for Chemical and Biological Sciences, University of Karachi | B.A.; I.A.; Khan, S.; M.A.and Khan; Qureshi; Raza; S.A.; Shakeel, M.; Zahid, M.                                                                                                                                                                                                                                                                                                                                                                                                                                                                                                                                                                     |
| EPI_ISL_416578                                                                                                                                                                                                                                                                                                                                                                                                                                                                                                                                                                                                                                                                                                                                                                                                                                    |           | Japanese Quarantine Stations                                                                                                                                                                                              | Pathogen Genomics Center, National Institute of Infectious Diseases                                                                                                                        | Hajime Kamiya; Hideki Hasegawa; Ikuyo Takayama; Kentaro Itokawa; Makoto Kuroda; Masanori Hashino; Motoi Suzuki; Rina Tanaka; Shinji Saito; Takaji Wakita; Takuri Takahashi; Takuya Yamagishi; Tsutomu Kagayama; Tsuyoshi Sekizuka                                                                                                                                                                                                                                                                                                                                                                                                                   |
| EPI_ISL_995743                                                                                                                                                                                                                                                                                                                                                                                                                                                                                                                                                                                                                                                                                                                                                                                                                                    |           | Jayanagar General Hospital                                                                                                                                                                                                | Department of Neurovirology, National Institute of Mental Health and Neurosciences (NIMHANS)                                                                                               | Anita S Desai; Anson Kunjumon George; Chitra Pattabiraman; Darshan Sreenivas; Harsha.P.K; Nakka Vijay Kiran Reddy; Pramada Prasad; Risha Rasheed; V Ravi                                                                                                                                                                                                                                                                                                                                                                                                                                                                                            |
| EPI_ISL_940598, EPI_ISL_1014919                                                                                                                                                                                                                                                                                                                                                                                                                                                                                                                                                                                                                                                                                                                                                                                                                   |           | Jessa                                                                                                                                                                                                                     | Jessa                                                                                                                                                                                      | Jessa_cmdLab                                                                                                                                                                                                                                                                                                                                                                                                                                                                                                                                                                                                                                        |
| EPI_ISL_791338, EPI_ISL_791347, EPI_ISL_791353, EPI_ISL_791383, EPI_ISL_861010, EPI_ISL_981076, EPI_ISL_1036358, EPI_ISL_1091929                                                                                                                                                                                                                                                                                                                                                                                                                                                                                                                                                                                                                                                                                                                  | see above | Johns Hopkins Hospital Department of Pathology                                                                                                                                                                            | Johns Hopkins Hospital Department of Pathology                                                                                                                                             | Adannaya Amadi; C. Paul Morris; Chun Huai Luo; Heba H. Mostafa; Matthew Schwartz; Nicholas Gallagher                                                                                                                                                                                                                                                                                                                                                                                                                                                                                                                                                |
| EPI_ISL_995713                                                                                                                                                                                                                                                                                                                                                                                                                                                                                                                                                                                                                                                                                                                                                                                                                                    |           | KEMPEGOWDA INTERNATIONAL AIRPORT                                                                                                                                                                                          | Department of Neurovirology, National Institute of Mental Health and Neurosciences (NIMHANS)                                                                                               | Anita S Desai; Anson Kunjumon George; Chitra Pattabiraman; Darshan Sreenivas; Nakka Vijay Kiran Reddy; Pramada Prasad; Risha Rasheed; V Ravi                                                                                                                                                                                                                                                                                                                                                                                                                                                                                                        |
| EPI_ISL_457875                                                                                                                                                                                                                                                                                                                                                                                                                                                                                                                                                                                                                                                                                                                                                                                                                                    |           | KEMRI-CGMR-C                                                                                                                                                                                                              | KEMRI-Wellcome Trust Research Programme/KEMRI-CGMR-C Kilifi                                                                                                                                | Githinji G. et al 2020                                                                                                                                                                                                                                                                                                                                                                                                                                                                                                                                                                                                                              |
| EPI_ISL_568699, EPI_ISL_806552, EPI_ISL_806611, EPI_ISL_806617, EPI_ISL_806652, EPI_ISL_806716, EPI_ISL_806717, EPI_ISL_855536, EPI_ISL_855542, EPI_ISL_855547, EPI_ISL_968807, EPI_ISL_968808, EPI_ISL_968810, EPI_ISL_968813, EPI_ISL_968821, EPI_ISL_968828, EPI_ISL_968829, EPI_ISL_968834, EPI_ISL_968849, EPI_ISL_968869, EPI_ISL_968881, EPI_ISL_968887, EPI_ISL_968891, EPI_ISL_968902, EPI_ISL_968907, EPI_ISL_968909, EPI_ISL_968910, EPI_ISL_968911, EPI_ISL_968913, EPI_ISL_968916, EPI_ISL_968919, EPI_ISL_968920, EPI_ISL_968922, EPI_ISL_968929, EPI_ISL_968956, EPI_ISL_968988, EPI_ISL_968990, EPI_ISL_968992, EPI_ISL_968996, EPI_ISL_968997, EPI_ISL_968999, EPI_ISL_969001, EPI_ISL_969012, EPI_ISL_969013, EPI_ISL_969014, EPI_ISL_969017, EPI_ISL_969018, EPI_ISL_969074, EPI_ISL_1039226, EPI_ISL_1039228, EPI_ISL_1039229 |           |                                                                                                                                                                                                                           |                                                                                                                                                                                            |                                                                                                                                                                                                                                                                                                                                                                                                                                                                                                                                                                                                                                                     |

|                                                                                                                                                                        |                                                                                                                                       |                                                                                                                                       | Githinji et al; Githinji et al 2020                                                                                                                                                                                                                                                                                                               |
|------------------------------------------------------------------------------------------------------------------------------------------------------------------------|---------------------------------------------------------------------------------------------------------------------------------------|---------------------------------------------------------------------------------------------------------------------------------------|---------------------------------------------------------------------------------------------------------------------------------------------------------------------------------------------------------------------------------------------------------------------------------------------------------------------------------------------------|
| see above                                                                                                                                                              | KEMRI-Wellcome Trust Research Programme/KEMRI-CGMR-C Kilifi                                                                           | KEMRI-Wellcome Trust Research Programme/KEMRI-CGMR-C Kilifi                                                                           |                                                                                                                                                                                                                                                                                                                                                   |
| EPI_ISL_455638                                                                                                                                                         | KRISP, KZN Research Innovation and Sequencing Platform                                                                                | KRISP, KZN Research Innovation and Sequencing Platform                                                                                | Chimukangara B; Deforche K; Giandhari J; Lessells R; Pillay S; Tegally H; Wilkinson E; de Oliveira T                                                                                                                                                                                                                                              |
| EPI_ISL_1094645, EPI_ISL_1094648                                                                                                                                       | KS Health and Environmental Laboratories                                                                                              | Respiratory Viruses Branch, Division of Viral Diseases, Centers for Disease Control and Prevention                                    | Anna Montmayeur; Anna Uehara; Ben L. Rambo-Martin; Clinton R. Paden; Dhvani Batra; Haibin Wang; Jasmine Padilla; Jing Zhang; Justin Lee; Krista Queen; Lori Rowe; Mark Burroughs; Mili Sheth; Peter W. Cook; Rachel Marine; Sarah Nobles; Suxiang Tong; Yan Li; Ying Tao                                                                          |
| EPI_ISL_912423, EPI_ISL_1048849, EPI_ISL_1057069                                                                                                                       | KU Leuven, Rega Institute, Clinical and Epidemiological Virology                                                                      | KU Leuven, Rega Institute, Clinical and Epidemiological Virology                                                                      | Bert Vanmechelen; Joan Marti-Carerras; Piet Maes; Tony Wawina-Bokalanga                                                                                                                                                                                                                                                                           |
| EPI_ISL_1039038                                                                                                                                                        | Kamchatka Regional Children's Infectious Diseases Hospital                                                                            | WHO National Influenza Centre Russian Federation                                                                                      | Andrey Komissarov; Anna Ivanova; Artem Fadeev; Daria Danilenko; Dmitry Bazhenov; Dmitry Lioznov; Elena Nabieva; Georgii Bazykin; Ksenia Safina; Kseniya Komissarova; Maria Pisareva; Maria Timofeeva; Tamila Musaeva; Veronika Eder                                                                                                               |
| EPI_ISL_883047, EPI_ISL_983365, EPI_ISL_1054889, EPI_ISL_1067720, EPI_ISL_1073818, EPI_ISL_1110572, EPI_ISL_1110576, EPI_ISL_1137048, EPI_ISL_1137049, EPI_ISL_1137051 |                                                                                                                                       |                                                                                                                                       |                                                                                                                                                                                                                                                                                                                                                   |
| see above                                                                                                                                                              | Kansas Health and Environmental Lab                                                                                                   | Kansas Health and Environmental Lab                                                                                                   | Ben Olsen; Carissa Robertson; Jonathan Barnell; Mike Grose; Paige Drury; and Phil Adam                                                                                                                                                                                                                                                            |
| EPI_ISL_1113759                                                                                                                                                        | Kashi Clinical Laboratory                                                                                                             | Kashi Clinical Laboratory                                                                                                             | Jenefer DeKoning; Zahra Kashi                                                                                                                                                                                                                                                                                                                     |
| EPI_ISL_512811, EPI_ISL_512812, EPI_ISL_512816                                                                                                                         | Kenema Government Hospital, Ministry of Health and Sanitation                                                                         | Kenema Government Hospital, Ministry of Health and Sanitation                                                                         | Andersen, K.; Garry, R.; Goba, A.; Grant, D.; Happi, C.; Jalloh, S.; Mehta, S.; Momoh, M.; Olawoye, I.; Oluniyi, P.; Park, D.; Sandi, J.; Siddle, K.; Tomkins-Tinch, C.                                                                                                                                                                           |
| EPI_ISL_745166                                                                                                                                                         | Khayelitsha Hospital wc KHA                                                                                                           | National Health Laboratory Service (NHLS), Tygerberg                                                                                  | Bronwyn Kleinhans; Eduan Wilkindon; Gert van Zyl; Houriyah Tegally; Kayla Delaney; Susan Engelbrecht; Tulio de Oliveira; Wolfgang Preiser                                                                                                                                                                                                         |
| EPI_ISL_845881                                                                                                                                                         | Kidwai Memorial Institute of Oncology                                                                                                 | Department of Neurovirology, National Institute of Mental Health and Neurosciences (NIMHANS)                                          | Anita S Desai; Chitra Pattabiraman; Darshan Sreenivas; Nakka Vijay Kiran Reddy; Pramada Prasad; Risha Rasheed; V Ravi                                                                                                                                                                                                                             |
| EPI_ISL_490002                                                                                                                                                         | King Fahad Medical City                                                                                                               | King Fahad Medical City                                                                                                               | Alghoraibi, M.; Alosaimi, B.; Enani, M.; Naeem, A.                                                                                                                                                                                                                                                                                                |
| EPI_ISL_483544, EPI_ISL_483550, EPI_ISL_483557, EPI_ISL_483564                                                                                                         | Kingdom of Bahrain Ministry of Health                                                                                                 | Erasmus Medical Center                                                                                                                | Amjad Ghanem Mohamed; Anne van der Linden; Bas Oude Munnink; Claudia Schapendonk; David Nieuwenhuijse; Ebrahim Shehad; Fatema; Hashmeya Al Wasti; Irina Chestakova; Marion Koopmans; Mark Pronk; Pascal Lexmond; Reina Sikkena; Richard Molenkamp; Stefan van Nieuwkoop; Theo Bestebroer; on behalf of the Dutch national COVID-19 response team. |
| EPI_ISL_538367                                                                                                                                                         | Kingston Health Sciences Centre / Queen's University                                                                                  | Ontario Institute for Cancer Research                                                                                                 | Bernard Lam; Calvin Sjaarda; Ilinca Lungu; Jared T. Simpson; Katya Douchant; Lawrence E Heisler; Michael Laszloffy; Paul Krzyzanowski; Prameet M. Sheth; Richard de Borja; Robert Colautti                                                                                                                                                        |
| EPI_ISL_676497, EPI_ISL_789017                                                                                                                                         | Klinisk Mikrobiologi                                                                                                                  | The Public Health Agency of Sweden                                                                                                    | Department of Microbiology; The Public Health Agency of Sweden                                                                                                                                                                                                                                                                                    |
| EPI_ISL_710600, EPI_ISL_766623, EPI_ISL_934335, EPI_ISL_934382, EPI_ISL_1064692                                                                                        | Klinisk mikrobiologi                                                                                                                  | The Public Health Agency of Sweden                                                                                                    | Anna Risberg; Anna-Malin Linde; Carlo Berg; Department of Microbiology; Karin Tegmark-Wisell; Maria Lind Karlberg; Mattias Haukland; Mia Brytting; Noura Walai; Oskar Karlsson Lindsjo; Petra Edquist; Petra Holmstrom; Reza Advani; Samuel Ohman; Sofia Stamouli; The Public Health Agency of Sweden                                             |
| EPI_ISL_648133                                                                                                                                                         | Klinisk mikrobiologi centralsjukhuset Karlstad                                                                                        | The Public Health Agency of Sweden                                                                                                    | Anna Risberg; Anna-Malin Linde; Karin Tegmark-Wisell; Maria Lind Karlberg; Mattias Haukland; Mia Brytting; Olov Svartstrom; Oskar Karlsson Lindsjo; Petra Edquist; Reza Advani; Sandra Brodsson                                                                                                                                                   |
| EPI_ISL_985376, EPI_ISL_1091527, EPI_ISL_1091558, EPI_ISL_1091560, EPI_ISL_1093539                                                                                     | Klinisk mikrobiologi, Region Västerbotten                                                                                             | CBRN Defence and Security, Swedish Defence Research Agency                                                                            | Andreas Sjödin; Anna-Lena Johansson; Annika Allard; Annika Osterman; Carolin Öhrman; Caroline Öhrman; David Sundell; Emelie Näslund Salomonsson; Ingrid Dacklin; Jonas Näslund; Kerstin Myrtennäs; Linda Karlsson; Malin Granberg; Mats Forsman; Stina Bäckman                                                                                    |
| EPI_ISL_831979                                                                                                                                                         | Klinisk mikrobiologi, Viruslab                                                                                                        | The Public Health Agency of Sweden                                                                                                    | Department of Microbiology; The Public Health Agency of Sweden                                                                                                                                                                                                                                                                                    |
| EPI_ISL_510876, EPI_ISL_582774, EPI_ISL_661285                                                                                                                         | Klinsisk mikrobiologi Linköping                                                                                                       | The Public Health Agency of Sweden                                                                                                    | Anna Risberg; Anna-Malin Linde; Department of Microbiology; Karin Tegmark-Wisell; Maria Lind Karlberg; Mattias Haukland; Mia Brytting; Olov Svartstrom; Oskar Karlsson Lindsjo; Petra Edquist; Reza Advani; Sandra Brodsson; The Public Health Agency of Sweden                                                                                   |
| EPI_ISL_700429                                                                                                                                                         | Knysna Hospital wc KNY                                                                                                                | NHLS/UCT                                                                                                                              | Arash Iranzadeh; Bruna Galvao; Carolyn Williamson; Deelan Doolabh; Diana Hardie; Houriyah Tegally; Innocent Mudau; Kruger Marais; Lynn Tyers; Marvin Hsiao; Stephen Korsman                                                                                                                                                                       |
| EPI_ISL_407193                                                                                                                                                         | Korea Centers for Disease Control & Prevention (KCDC) Center for Laboratory Control of Infectious Diseases Division of Viral Diseases | Korea Centers for Disease Control & Prevention (KCDC) Center for Laboratory Control of Infectious Diseases Division of Viral Diseases | Heui Man Kim; Hye-Joon Jo; Jeong-Min Kim; Mi-Seon Kim; Myung Guk Han; Namjoo Lee; SangHee Woo; Sehee Park; Yoon-Seok Chung                                                                                                                                                                                                                        |
| EPI_ISL_515181                                                                                                                                                         | Kumasi Centre for Collaborative Research in Tropical Medicine, Kumasi.                                                                | Institute of Virology, Charité - Universitätsmedizin Berlin                                                                           | Augustina Sylverken; Christian Drosten; Eric Adu; Jesse Addo Asamoah; Julia Schneider; Jörn Beheim-Schwarzbach; Michael Owusu; Philip El-Duah; Richard Phillips.; Richmond Gorman; Richmond Yeboah; Sherihane Aryeetey; Victor Max Corman                                                                                                         |
| EPI_ISL_735492                                                                                                                                                         | Kumilla Medical College                                                                                                               | Central Biological Research Laboratory and Department of Biochemistry and Molecular Biology                                           | H. M. Abdullah Al Masud; Imam Hossen; Md. Arif Hossain; Md. Imranul Hoq; Md. Khondakar Raziur Rahman; Md. Omer Faruq; Mohammad Omar Faruque; Robiul Hasan Bhuiyan; Sajib Rudra; Shanta Paul                                                                                                                                                       |
| EPI_ISL_956303                                                                                                                                                         | LABORATORIO ANALIZAR SYNLAB                                                                                                           | Instituto Nacional de Salud- Dirección de Investigación en Salud Pública                                                              | Carlos Franco-Muñoz; Diego A. Álvarez-Díaz; Gerardo Santamaría; Hector Alejandro Ruiz-Moreno; Jhonnatan Reales-González; Julian Naizaque; Katherine Laiton-Donato; Magdalena Wiesner; Marcela Mercado-Reyes; María T. Herrera-Sepúlveda; Martha Lucia Ospina Martínez; Mauricio Pacheco-Montealegre; Sheryll Corchuelo                            |
| EPI_ISL_914833                                                                                                                                                         | LABORATORIO CLINICO LABIN                                                                                                             | Incienza, Instituto Costarricense de Investigación y Enseñanza en Nutrición y Salud                                                   | Adriana Godínez; Claudio Soto-Garita; Estela Cordero; Francisco Duarte; Hebleen Porras; Melany Calderón & Pei Ling Chan Ma                                                                                                                                                                                                                        |
| EPI_ISL_918502, EPI_ISL_918507, EPI_ISL_918535                                                                                                                         | LACEN - Laboratório Central de Saúde Pública do Amazonas                                                                              | Evandro Chagas Institute                                                                                                              | A.M.; Barbagelata; E.C.; E.M.A.; Ferreira; J.A.; Junior; K.C.; L.C.; L.S.; M.C.; P.S.; Pinheiro; Santos; Silva; Sousa; Sousa Junior; W.D.C.; da Silva                                                                                                                                                                                             |
| EPI_ISL_1086373                                                                                                                                                        | LACEN - Laboratório Central de Saúde Pública do Maranhao                                                                              | Evandro Chagas Institute                                                                                                              | A.M.; Barbagelata; E.C.; E.M.A.; Ferreira; J.A.; Junior; K.C.; L.C.; L.S.; M.C.; P.S.; Pinheiro; Santos; Silva; Sousa; Sousa Junior; W.D.C.; da Silva                                                                                                                                                                                             |
| EPI_ISL_918524, EPI_ISL_918526, EPI_ISL_918545, EPI_ISL_918547, EPI_ISL_918548, EPI_ISL_918550                                                                         | LACEN - Laboratório Central de Saúde Pública do Para                                                                                  | Evandro Chagas Institute                                                                                                              | A.M.; Barbagelata; E.C.; E.M.A.; Ferreira; J.A.; Junior; K.C.; L.C.; L.S.; M.C.; P.S.; Pinheiro; Santos; Silva; Sousa; Sousa Junior; W.D.C.; da Silva                                                                                                                                                                                             |
| EPI_ISL_717832                                                                                                                                                         | LACEN Dr. Francisco Rimolo Neto                                                                                                       | Bioinformatics Laboratory / LNCC                                                                                                      | Alexandra L Gerber; Amílcar Tanuri; Ana Paula de C Guimarães; Ana Tereza R de Vasconcelos; Andréa Cony Cavalcanti; Carolina M Voloch; Claudia dos Santos Rodrigues; Cynthia C Cardoso; Diana Mariani; Luiz G P de Almeida; Otavio Bustrolini; Ronaldo da Silva F Jr; Terezinha M P P Castiñeira                                                   |
| EPI_ISL_717909                                                                                                                                                         | LACEN RJ - Noel Nutels                                                                                                                | Bioinformatics Laboratory / LNCC                                                                                                      | Alexandra L Gerber; Amílcar Tanuri; Ana Paula de C Guimarães; Ana Tereza R de Vasconcelos; Andréa Cony Cavalcanti; Carolina M Voloch; Claudia dos Santos Rodrigues; Cynthia C Cardoso; Diana Mariani; Luiz G P de Almeida; Otavio Bustrolini; Ronaldo da Silva F Jr; Terezinha M P P Castiñeira                                                   |
| EPI_ISL_985307                                                                                                                                                         | LACEN do Estado de Goias                                                                                                              | Instituto Adolfo Lutz, Interdisciplinary Procedures Center, Strategic Laboratory                                                      | Claudia Regina Gonçalves; Claudio Tavares Sacchi; Erica Valessa Ramos Gomes; Karoline Rodrigues Campos                                                                                                                                                                                                                                            |
| EPI_ISL_943981                                                                                                                                                         | LACEN do Estado de Tocantins                                                                                                          | Instituto Adolfo Lutz, Interdisciplinary Procedures Center, Strategic Laboratory                                                      | Claudia Regina Gonçalves; Claudio Tavares Sacchi; Erica Valessa Ramos Gomes; Karoline Rodrigues Campos                                                                                                                                                                                                                                            |
| EPI_ISL_1040827, EPI_ISL_1040828, EPI_ISL_1040833                                                                                                                      | LACEN do Mato Grosso do Sul                                                                                                           | Instituto Adolfo Lutz, Interdisciplinary Procedures Center, Strategic Laboratory                                                      | Claudia Regina Gonçalves; Claudio Tavares Sacchi; Erica Valessa Ramos Gomes; Karoline Rodrigues Campos                                                                                                                                                                                                                                            |
| EPI_ISL_861880, EPI_ISL_861894, EPI_ISL_861903, EPI_ISL_861909                                                                                                         | LATE - Laboratório de Técnicas Especiais - Hospital Israelita Albert Einstein                                                         | LATE - Laboratório de Técnicas Especiais - Hospital Israelita Albert Einstein                                                         | Ana Paula Moreira Salles; Deyvid Amgarten; Fernanda de Mello Malta; João Renato Rebello Pinho; Pedro Henrique Sebe Rodrigues; Raquel Riyuzo                                                                                                                                                                                                       |
| EPI_ISL_1091786                                                                                                                                                        | LDSP                                                                                                                                  | Universidad Nacional de Colombia - Laboratorio Genómico One Health                                                                    | Andres F. Cardona-Rios; Carlos Franco-Muñoz; Daniel O. Maldonado-Perez; Diego A. Álvarez-Díaz; Idabely Betancur Ortiz; Jorge E. Osorio; Juan P. Hernandez-Ortiz; Karl A Ciudadis; Laura Silvana Perez; Marcela Mercado-Reyes; María Angélica Maya; Sandra Ines Cano                                                                               |
| EPI_ISL_794653                                                                                                                                                         | LSP DEL TOLIMA                                                                                                                        | Instituto Nacional de Salud - Dirección de Investigación en                                                                           | Carlos Franco-Muñoz; Diego A. Álvarez-Díaz; Diego Andrés Prada; Gerardo Santamaría; Jonathan Reales; Julian Naizaque; Katherine Laiton-Donato;                                                                                                                                                                                                    |



|                                                                                                                                                                                                                                                                                                                                                                                                                                                                                                                                                                                                                                                                                                                                             |                                                                                                                   |                                                                                                                                                                                                                                                                                                                                                                                                                                                                                                                                                                                                                                                                                                                                                                                                                                                                                                            |
|---------------------------------------------------------------------------------------------------------------------------------------------------------------------------------------------------------------------------------------------------------------------------------------------------------------------------------------------------------------------------------------------------------------------------------------------------------------------------------------------------------------------------------------------------------------------------------------------------------------------------------------------------------------------------------------------------------------------------------------------|-------------------------------------------------------------------------------------------------------------------|------------------------------------------------------------------------------------------------------------------------------------------------------------------------------------------------------------------------------------------------------------------------------------------------------------------------------------------------------------------------------------------------------------------------------------------------------------------------------------------------------------------------------------------------------------------------------------------------------------------------------------------------------------------------------------------------------------------------------------------------------------------------------------------------------------------------------------------------------------------------------------------------------------|
|                                                                                                                                                                                                                                                                                                                                                                                                                                                                                                                                                                                                                                                                                                                                             | Salud Pública                                                                                                     | Magdalena Wiesner; Marcela Mercado-Reyes; María T. Herrera; Martha Lucia Ospina Martinez; Mauricio Pacheco-Montealegre; Paola Muñoz-Laiton; Sheryl Corchuelo                                                                                                                                                                                                                                                                                                                                                                                                                                                                                                                                                                                                                                                                                                                                               |
| EPI_ISL_778994, EPI_ISL_889588, EPI_ISL_1039676, EPI_ISL_1040078                                                                                                                                                                                                                                                                                                                                                                                                                                                                                                                                                                                                                                                                            | LSUHS Emerging Viral Threat Laboratory                                                                            | Microbial Genome Sequencing Center                                                                                                                                                                                                                                                                                                                                                                                                                                                                                                                                                                                                                                                                                                                                                                                                                                                                         |
| EPI_ISL_1109892                                                                                                                                                                                                                                                                                                                                                                                                                                                                                                                                                                                                                                                                                                                             | Lab voor klinische biologie                                                                                       | Lab voor klinische biologie                                                                                                                                                                                                                                                                                                                                                                                                                                                                                                                                                                                                                                                                                                                                                                                                                                                                                |
| EPI_ISL_456196, EPI_ISL_456197, EPI_ISL_456381, EPI_ISL_548022, EPI_ISL_548072, EPI_ISL_579403, EPI_ISL_582017, EPI_ISL_622807, EPI_ISL_622822, EPI_ISL_626352, EPI_ISL_626353, EPI_ISL_626354, EPI_ISL_637089, EPI_ISL_661257, EPI_ISL_661262, EPI_ISL_661263, EPI_ISL_682293, EPI_ISL_682294, EPI_ISL_707797, EPI_ISL_707803, EPI_ISL_707805, EPI_ISL_732964, EPI_ISL_732967, EPI_ISL_756627, EPI_ISL_756631, EPI_ISL_756632, EPI_ISL_756633, EPI_ISL_877209, EPI_ISL_877212, EPI_ISL_877221, EPI_ISL_877226, EPI_ISL_1016846, EPI_ISL_1016847, EPI_ISL_1016849, EPI_ISL_1016853, EPI_ISL_1016854, EPI_ISL_1016858, EPI_ISL_1016862, EPI_ISL_1016867, EPI_ISL_1016869, EPI_ISL_1016871, EPI_ISL_1016873, EPI_ISL_1082265, EPI_ISL_1082268 | Bruno Verhasselt; Hannelore Hamerlinck; Marija Janevska                                                           |                                                                                                                                                                                                                                                                                                                                                                                                                                                                                                                                                                                                                                                                                                                                                                                                                                                                                                            |
| see above                                                                                                                                                                                                                                                                                                                                                                                                                                                                                                                                                                                                                                                                                                                                   | LabPLUS                                                                                                           | Institute of Environmental Science and Research (ESR)                                                                                                                                                                                                                                                                                                                                                                                                                                                                                                                                                                                                                                                                                                                                                                                                                                                      |
| EPI_ISL_547971, EPI_ISL_547995, EPI_ISL_548104, EPI_ISL_548105, EPI_ISL_579422, EPI_ISL_1016856, EPI_ISL_1113757                                                                                                                                                                                                                                                                                                                                                                                                                                                                                                                                                                                                                            |                                                                                                                   | Anja Werno; Antje van der Linden; Arlo Upton; Chris Mansell; David Hammer; Dragana Drinkovic; Erasmus Smit; Gary McAuliffe; Hana Sofia Andersson; Hermes Perez; James Ussher; Jill Sherwood; Jing Wang; Joep de Ligt; Josh Freeman; Julia Howard; Juliet Elvy; Lauren Jelly; Mary DeAlmeida; Matt Blakiston; Matt Storey; Matthew Rogers; Max Bloomfield; Michael Addidle; Michelle Balm; Muhammad Faisal; Nikki Freed; Olin Silander; Olivia Stroeven; Rachel Boyle; Sally Roberts; SallyAnn Harbison; Sarah Jefferies; Sharmini Muttaiyah; Susan Morpeth; Susan Taylor; Timothy Blackmore; Vani Sathyendran; Veronica Playle; Virginia Hope; Xiaoyun Ren                                                                                                                                                                                                                                                 |
| see above                                                                                                                                                                                                                                                                                                                                                                                                                                                                                                                                                                                                                                                                                                                                   | LabTests                                                                                                          | Institute of Environmental Science and Research (ESR)                                                                                                                                                                                                                                                                                                                                                                                                                                                                                                                                                                                                                                                                                                                                                                                                                                                      |
| EPI_ISL_886353, EPI_ISL_886706, EPI_ISL_886771, EPI_ISL_886917, EPI_ISL_887614, EPI_ISL_887638, EPI_ISL_887675, EPI_ISL_887783, EPI_ISL_888179, EPI_ISL_888237, EPI_ISL_888402, EPI_ISL_888411, EPI_ISL_888462                                                                                                                                                                                                                                                                                                                                                                                                                                                                                                                              |                                                                                                                   | Anja Werno; Antje van der Linden; Arlo Upton; Chris Mansell; David Hammer; Dragana Drinkovic; Erasmus Smit; Gary McAuliffe; Hana Sofia Andersson; Hermes Perez; James Ussher; Jill Sherwood; Jing Wang; Joep de Ligt; Josh Freeman; Julia Howard; Juliet Elvy; Lauren Jelly; Mary DeAlmeida; Matt Blakiston; Matt Storey; Matthew Rogers; Max Bloomfield; Michael Addidle; Michelle Balm; Muhammad Faisal; Nikki Freed; Olin Silander; Olivia Stroeven; Rachel Boyle; Sally Roberts; SallyAnn Harbison; Sarah Jefferies; Sharmini Muttaiyah; Susan Morpeth; Susan Taylor; Timothy Blackmore; Vani Sathyendran; Veronica Playle; Virginia Hope; Xiaoyun Ren                                                                                                                                                                                                                                                 |
| see above                                                                                                                                                                                                                                                                                                                                                                                                                                                                                                                                                                                                                                                                                                                                   | Labcorp                                                                                                           | Genomics and Discovery, Respiratory Viruses Branch, Division of Viral Diseases, Centers for Disease Control and Prevention                                                                                                                                                                                                                                                                                                                                                                                                                                                                                                                                                                                                                                                                                                                                                                                 |
| EPI_ISL_768840, EPI_ISL_769863, EPI_ISL_775219, EPI_ISL_775220, EPI_ISL_775221, EPI_ISL_775222, EPI_ISL_775225, EPI_ISL_775256, EPI_ISL_775258, EPI_ISL_775260, EPI_ISL_775262, EPI_ISL_775263                                                                                                                                                                                                                                                                                                                                                                                                                                                                                                                                              |                                                                                                                   | : Amanda Douglas; Amanda Suchanek; Andrea Throop; Ayla Burns; Ben L. Rambo-Martin; Bobbi Croy; Brian Krueger; Brian Norvell; Christos Petropoulos; Clinton R. Paden; Craig Lukaski; Debbie Boles; Dhvani Batra; Duncan MacCannell; Eyad Almasri; Goran Stevovic; Howard Engler; Hrushikesh Deshmukh; Jake Humphrey; Jana Schroth; Joe Voshell; John Pruitt; Jonathan Meltzer; Jonathan Williams; Kimberly Wagner; Lax Iyer; Lyndon Tilson; Manoj Jain; Marcia Eisenberg; Mary Ann Cristobal; Mary Williamson; Michael Levandoski; Mike Sapeta; Mindy Nye; Mino Agarwal; Mohan Kolli; Nuthawin Charoensri; Oren Cohen; Peter W. Cook; Prashant Gupta; Qian Zeng; Rama Ghatti; Scott Parker; Scott Ryan; Stanley Letovsky; Steven Ragan; Summer Galloway; Suresh Babu Selvaraju; Susan Countryman; Susan Hicks; Suxiang Tong; Suzanne Dale; Thomas Urban; Tim Kuphal; Tricia Zwiefelhofer; Vincent Drouillon |
| see above                                                                                                                                                                                                                                                                                                                                                                                                                                                                                                                                                                                                                                                                                                                                   | Laboratoire Biolife                                                                                               | Laboratoire de Biotechnologie                                                                                                                                                                                                                                                                                                                                                                                                                                                                                                                                                                                                                                                                                                                                                                                                                                                                              |
| EPI_ISL_1013443                                                                                                                                                                                                                                                                                                                                                                                                                                                                                                                                                                                                                                                                                                                             | Laboratoire associé au CNR des Virus Influenzae                                                                   | National Reference Center for Viruses of Respiratory Infections, Institut Pasteur, Paris                                                                                                                                                                                                                                                                                                                                                                                                                                                                                                                                                                                                                                                                                                                                                                                                                   |
| EPI_ISL_1103576, EPI_ISL_1107189, EPI_ISL_1109622, EPI_ISL_1109623, EPI_ISL_1116465, EPI_ISL_1116466, EPI_ISL_1116470, EPI_ISL_1116555, EPI_ISL_1117289, EPI_ISL_1120732                                                                                                                                                                                                                                                                                                                                                                                                                                                                                                                                                                    |                                                                                                                   | Abdelmunim Essabbar; Amal Zouaki; Ghizlane EL Amin; Hakima Kabbaj; Lahcen Belyamani and Azeddine Ibrahim; Lahcen Belyamani and Azeddine Ibrahim; Mouna Ouadghiri; Myriam Seffar; Saaid Amzazi; Tarik Aanniz                                                                                                                                                                                                                                                                                                                                                                                                                                                                                                                                                                                                                                                                                                |
| see above                                                                                                                                                                                                                                                                                                                                                                                                                                                                                                                                                                                                                                                                                                                                   | Laboratoire central de Virologie                                                                                  | Laboratoire de Biotechnologie                                                                                                                                                                                                                                                                                                                                                                                                                                                                                                                                                                                                                                                                                                                                                                                                                                                                              |
| EPI_ISL_1103584                                                                                                                                                                                                                                                                                                                                                                                                                                                                                                                                                                                                                                                                                                                             | Laboratoire central de Virologie, Centre hospitalo-universitaire Ibn Sina, Hôpital des spécialités                | Laboratoire de Biotechnologie                                                                                                                                                                                                                                                                                                                                                                                                                                                                                                                                                                                                                                                                                                                                                                                                                                                                              |
| EPI_ISL_1105946                                                                                                                                                                                                                                                                                                                                                                                                                                                                                                                                                                                                                                                                                                                             | Laboratoire central de Virologie, Centre hospitalo-universitaire Ibn Sina Hôpital des spécialités                 | Laboratoire de Biotechnologie                                                                                                                                                                                                                                                                                                                                                                                                                                                                                                                                                                                                                                                                                                                                                                                                                                                                              |
| EPI_ISL_1103579                                                                                                                                                                                                                                                                                                                                                                                                                                                                                                                                                                                                                                                                                                                             | Laboratoire central de Virologie, Centre hospitalo-universitaire Ibn Sina, Hôpital des spécialités                | Laboratoire de Biotechnologie                                                                                                                                                                                                                                                                                                                                                                                                                                                                                                                                                                                                                                                                                                                                                                                                                                                                              |
| EPI_ISL_1103569                                                                                                                                                                                                                                                                                                                                                                                                                                                                                                                                                                                                                                                                                                                             | Laboratoire central de Virologie, Centre hospitalo-universitaire Ibn Sina, Hôpital des spécialités, Rabat         | Laboratoire de Biotechnologie                                                                                                                                                                                                                                                                                                                                                                                                                                                                                                                                                                                                                                                                                                                                                                                                                                                                              |
| EPI_ISL_660446, EPI_ISL_660448, EPI_ISL_660450, EPI_ISL_660451, EPI_ISL_660452, EPI_ISL_660455, EPI_ISL_660473, EPI_ISL_660478, EPI_ISL_660479, EPI_ISL_660488, EPI_ISL_660496, EPI_ISL_660511, EPI_ISL_660519                                                                                                                                                                                                                                                                                                                                                                                                                                                                                                                              |                                                                                                                   | Abdoul-Salam Ouedraogo; Arsène Zongo; Essia Belarbi; Fabian Leendertz; Grit Schubert; Halidou Tinto; Lassana Sangaré; Soumeiya Ouangraoua; Yacouba Sawadogo; Zekiba Tamagda                                                                                                                                                                                                                                                                                                                                                                                                                                                                                                                                                                                                                                                                                                                                |
| see above                                                                                                                                                                                                                                                                                                                                                                                                                                                                                                                                                                                                                                                                                                                                   | Laboratoire de Microbiologie CHU Souro Sanou                                                                      | Centre Muraz                                                                                                                                                                                                                                                                                                                                                                                                                                                                                                                                                                                                                                                                                                                                                                                                                                                                                               |
| EPI_ISL_1116464, EPI_ISL_1116469, EPI_ISL_1118884, EPI_ISL_1118923, EPI_ISL_1118926                                                                                                                                                                                                                                                                                                                                                                                                                                                                                                                                                                                                                                                         | Laboratoire de Microbiologie- CHU Habib Bourguiba - Sfax                                                          | Laboratoire des Procédés de Criblage Moléculaire et Cellulaire-Centre de Biotechnologie de Sfax                                                                                                                                                                                                                                                                                                                                                                                                                                                                                                                                                                                                                                                                                                                                                                                                            |
| EPI_ISL_712062, EPI_ISL_712063, EPI_ISL_712064, EPI_ISL_712065, EPI_ISL_712066, EPI_ISL_712067, EPI_ISL_712069                                                                                                                                                                                                                                                                                                                                                                                                                                                                                                                                                                                                                              |                                                                                                                   | A. and Masmoudi, S.; Abdelmoulah, F.; Abid, N.; Ajili, F.; Aouni, M.; Ben Ayed, I.; Bensaïd, M.; Chtourou, A.; Elargoubi, A.; Fki-berrajah, L.; Gaaloul, I.; Gargouri, S.; Hammami, A.; Kamoun, S.; Karray Hakim, H.; Kharat, N.; Mastouri, M.; Mhalla, S.; Nabli, A.; Rebai; Smeti, I.; Souissi, A.; Stambouli, N.; Turki, M.                                                                                                                                                                                                                                                                                                                                                                                                                                                                                                                                                                             |
| see above                                                                                                                                                                                                                                                                                                                                                                                                                                                                                                                                                                                                                                                                                                                                   | Laboratoire de Microbiologie- CHU Habib Bourguiba - Sfax adresse                                                  | Laboratoire des Procédés de Criblage Moléculaire et Cellulaire-Centre de Biotechnologie de Sfax                                                                                                                                                                                                                                                                                                                                                                                                                                                                                                                                                                                                                                                                                                                                                                                                            |
| EPI_ISL_825759, EPI_ISL_890399, EPI_ISL_1004175, EPI_ISL_1004176, EPI_ISL_1004177                                                                                                                                                                                                                                                                                                                                                                                                                                                                                                                                                                                                                                                           | Laboratoire de santé publique du Québec                                                                           | Laboratoire de santé publique du Québec                                                                                                                                                                                                                                                                                                                                                                                                                                                                                                                                                                                                                                                                                                                                                                                                                                                                    |
| EPI_ISL_779781                                                                                                                                                                                                                                                                                                                                                                                                                                                                                                                                                                                                                                                                                                                              | Laboratoire de virologie, CHU de Grenoble                                                                         | CNR Virus des Infections Respiratoires - France SUD                                                                                                                                                                                                                                                                                                                                                                                                                                                                                                                                                                                                                                                                                                                                                                                                                                                        |
| EPI_ISL_476824, EPI_ISL_476826, EPI_ISL_476830, EPI_ISL_476831                                                                                                                                                                                                                                                                                                                                                                                                                                                                                                                                                                                                                                                                              | Laboratoire des Fièvres Hémostatiques Virales du Benin                                                            | Charité-Universitätsmedizin Berlin                                                                                                                                                                                                                                                                                                                                                                                                                                                                                                                                                                                                                                                                                                                                                                                                                                                                         |
| EPI_ISL_629098                                                                                                                                                                                                                                                                                                                                                                                                                                                                                                                                                                                                                                                                                                                              | Laboratoire du Centre Hospitalier Annecy Genevois                                                                 | CNR Virus des Infections Respiratoires - France SUD                                                                                                                                                                                                                                                                                                                                                                                                                                                                                                                                                                                                                                                                                                                                                                                                                                                        |
| EPI_ISL_910439, EPI_ISL_910626, EPI_ISL_910908, EPI_ISL_910912, EPI_ISL_910914, EPI_ISL_911006, EPI_ISL_911107, EPI_ISL_911185, EPI_ISL_911210                                                                                                                                                                                                                                                                                                                                                                                                                                                                                                                                                                                              |                                                                                                                   | Guillaume Bourque; Ioannis Ragoussis; Jesse Shapiro; Mark Lathrop and Michel Roger on behalf of the CoVSeQ research group; Mark Lathrop and Michel Roger on behalf of the CoVSeQ research group ( <a href="http://covseq.ca/researchgroup/">http://covseq.ca/researchgroup/</a> ); Sandrine Moreira                                                                                                                                                                                                                                                                                                                                                                                                                                                                                                                                                                                                        |
| see above                                                                                                                                                                                                                                                                                                                                                                                                                                                                                                                                                                                                                                                                                                                                   | Laboratoire national de sante, Microbiology, Virology                                                             | Laboratoire national de sante, Microbiology, Microbial Genomics Platform                                                                                                                                                                                                                                                                                                                                                                                                                                                                                                                                                                                                                                                                                                                                                                                                                                   |
| EPI_ISL_739827, EPI_ISL_740456, EPI_ISL_740472, EPI_ISL_740538, EPI_ISL_744136, EPI_ISL_745025, EPI_ISL_745026, EPI_ISL_771060, EPI_ISL_771072                                                                                                                                                                                                                                                                                                                                                                                                                                                                                                                                                                                              |                                                                                                                   | Antonin Bal; Bruno Lina; Gregory Destras; Gwendolynne Burfin; Hadrien Règue; Laurence Josset; Martine Valette; Quentin Semanas; Sylvie Larrat                                                                                                                                                                                                                                                                                                                                                                                                                                                                                                                                                                                                                                                                                                                                                              |
| see above                                                                                                                                                                                                                                                                                                                                                                                                                                                                                                                                                                                                                                                                                                                                   | Laboratoire national de santé, Microbiology, Virology                                                             | Laboratoire national de santé, Microbiology, Microbial Genomics Platform                                                                                                                                                                                                                                                                                                                                                                                                                                                                                                                                                                                                                                                                                                                                                                                                                                   |
| EPI_ISL_792497                                                                                                                                                                                                                                                                                                                                                                                                                                                                                                                                                                                                                                                                                                                              | Laboratorio Central Mg. Luis Alfredo Pianciola                                                                    | Hospital Regional Ushuaia - Centro Austral De Investigaciones Cientificas - Universidad Nacional De Tierra Del Fuego on behalf of 'Proyecto Argentino Interinstitucional de genómica de SARS-CoV-2' (PAIS Consortium)                                                                                                                                                                                                                                                                                                                                                                                                                                                                                                                                                                                                                                                                                      |
| EPI_ISL_964914                                                                                                                                                                                                                                                                                                                                                                                                                                                                                                                                                                                                                                                                                                                              | Laboratorio Central Mg. Luis Alfredo Pianciola on behalf of 'Proyecto Argentino Interinstitucional de genómica de | Laboratorio Central Mg. Luis Alfredo Pianciola on behalf of 'Proyecto Argentino Interinstitucional de genómica de                                                                                                                                                                                                                                                                                                                                                                                                                                                                                                                                                                                                                                                                                                                                                                                          |
|                                                                                                                                                                                                                                                                                                                                                                                                                                                                                                                                                                                                                                                                                                                                             |                                                                                                                   | C; CF; Ceballos; F; Gallego; Gramundi; ID; M; MC; Mazzeo; Nardi; Pianciola, L.; Pinto; SG; Ziehm                                                                                                                                                                                                                                                                                                                                                                                                                                                                                                                                                                                                                                                                                                                                                                                                           |
|                                                                                                                                                                                                                                                                                                                                                                                                                                                                                                                                                                                                                                                                                                                                             |                                                                                                                   | C Pintos; C Ziehm; J Ousset; L Pianciola.; M Fernandez; M Mazzeo; M Nabaes                                                                                                                                                                                                                                                                                                                                                                                                                                                                                                                                                                                                                                                                                                                                                                                                                                 |

|                                                                                                                                                                                                                                                                                                                                                                                                                                                                                                                                                                                                  | SARS-CoV-2' (PAIS Consortium)                                                                                                                                                                                         | SARS-CoV-2' (PAIS Consortium)                                                                                                                                                                       |                                                                                                                                                                                                                                                                                                                                                                            |
|--------------------------------------------------------------------------------------------------------------------------------------------------------------------------------------------------------------------------------------------------------------------------------------------------------------------------------------------------------------------------------------------------------------------------------------------------------------------------------------------------------------------------------------------------------------------------------------------------|-----------------------------------------------------------------------------------------------------------------------------------------------------------------------------------------------------------------------|-----------------------------------------------------------------------------------------------------------------------------------------------------------------------------------------------------|----------------------------------------------------------------------------------------------------------------------------------------------------------------------------------------------------------------------------------------------------------------------------------------------------------------------------------------------------------------------------|
| EPI_ISL_981032                                                                                                                                                                                                                                                                                                                                                                                                                                                                                                                                                                                   | Laboratorio Central Sección Virología. Hospital Regional Artemides Zatti (Viedma, Río Negro); Laboratorio MICROBIOM (General Roca, Río Negro); Hospital Zonal Dr. Ramón Carrillo (San Carlos De Bariloche, Río Negro) | Laboratorio Central Mg. Luis Alfredo Pianiola on behalf of 'Proyecto Argentino Interinstitucional de genómica de SARS-CoV-2' (PAIS Consortium)                                                      | Antonela De Fino; C Pintos; C Ziehm; Darío Fabián de Prátula; J Ousset; L PIANCIOLA.; Liliana Fonseca; M Fernandez; M Nabaes; Marcela Nóbile; María Laura Álvarez; Patricia Valeria Blanco; Silvana Cecchi; Yesica Espasandin                                                                                                                                              |
| EPI_ISL_792546                                                                                                                                                                                                                                                                                                                                                                                                                                                                                                                                                                                   | Laboratorio Central, Ministerio de Salud Córdoba                                                                                                                                                                      | Instituto de Patología Vegetal (CIAP-INTA) on behalf of 'Proyecto Argentino Interinstitucional de genómica de SARS-CoV-2' (PAIS Consortium)                                                         | Barbas, G.; Castro, G.; Debat, HJ.; FD; Fernández; MB; Pisano; Re; V                                                                                                                                                                                                                                                                                                       |
| EPI_ISL_779189, EPI_ISL_779196, EPI_ISL_779198, EPI_ISL_979331, EPI_ISL_979334, EPI_ISL_979338, EPI_ISL_1092458                                                                                                                                                                                                                                                                                                                                                                                                                                                                                  |                                                                                                                                                                                                                       |                                                                                                                                                                                                     |                                                                                                                                                                                                                                                                                                                                                                            |
| see above                                                                                                                                                                                                                                                                                                                                                                                                                                                                                                                                                                                        | Laboratorio Estatal de Salud Pública de Nuevo León                                                                                                                                                                    | Laboratorio de Infectología Molecular, Departamento de Bioquímica y Medicina Molecular, Facultad de Medicina - Universidad Autónoma de Nuevo León                                                   | Ana M. Rivas-Estilla; Consuelo Treviño-Garza; Daniel Arellanos-Soto; Else del Carmen García-García; Gloria A. Jasso-de-la-Peña; Kame A. Galán-Huerta; Manuel E. de-la-O-Cavazos; María F. Herrera-Saldivar; Natalia Martínez-Acuña; Roberto Montes-de-Oca; Samuel Buentello-Wong; Sonia A. Lozano-Sepúlveda                                                                |
| EPI_ISL_794592                                                                                                                                                                                                                                                                                                                                                                                                                                                                                                                                                                                   | Laboratorio Estatal de Salud Pública de Tamaulipas                                                                                                                                                                    | Instituto de diagnóstico y Referencia Epidemiológicos (INDRE)                                                                                                                                       | Abril Rodríguez-Maldonado; Ana María Cortez-Calderon; Bernardita Reyes-Berrones; Celia Alpuche-Aranda; Claudia Wong-Arambula; Ernesto Ramirez-Gonzalez.; Fabiola Garces-Ayala; Gisela Barrera-Badillo; Gloria Molina-Gamboá; Hilda del Carmen-Selvera; Hugo Lopez Gatell-Ramirez; Irma Lopez-Martinez; Jose Luis Alomia-Zegarra; Lucia Hernandez-Rivas                     |
| EPI_ISL_1092006                                                                                                                                                                                                                                                                                                                                                                                                                                                                                                                                                                                  | Laboratorio IMAT                                                                                                                                                                                                      | Instituto Nacional de Salud- Dirección de Investigación en Salud Pública                                                                                                                            | Carlos Franco-Muñoz; Diego A. Álvarez-Díaz; Diego Andrés Prada; Gerardo Santamaría; Hector Alejandro Ruiz-Moreno; Jhonnatan Reales-González; Julian Naizaque; Katherine Laiton-Donato; Magdalena Wiesner; Marcela Mercado-Reyes; María T. Herrera-Sepúlveda; Martha Lucia Ospina Martinez; Sheryll Corchuelo                                                               |
| EPI_ISL_837584                                                                                                                                                                                                                                                                                                                                                                                                                                                                                                                                                                                   | Laboratorio Nacional de Salud                                                                                                                                                                                         | Laboratory of Respiratory Viruses and Measles, Oswaldo Cruz Institute, FIOCRUZ                                                                                                                      | Ana Carolina Mendonca; Anna Carolina Paixao; Cesar Roberto Conde Pereira; Claudia Estrada; Fernando Motta; Luciana Appolinario; Marilda Siqueira on behalf of the Fiocruz COVID-19 Genomic Surveillance Network; Paola Resende                                                                                                                                             |
| EPI_ISL_1091272                                                                                                                                                                                                                                                                                                                                                                                                                                                                                                                                                                                  | Laboratorio PGM                                                                                                                                                                                                       | Laboratorio de Infectología Molecular, Departamento de Bioquímica y Medicina Molecular, Facultad de Medicina - Universidad Autónoma de Nuevo León                                                   | Ana M. Rivas-Estilla; Daniel Arellanos-Soto; Eduardo Garza-de-la-Peña; Gabriela Elizondo; Javier Ramos-Jimenez; Kame A. Galán-Huerta; María F. Herrera-Saldivar; Natalia Martínez-Acuña; Sonia A. Lozano-Sepúlveda                                                                                                                                                         |
| EPI_ISL_1092361                                                                                                                                                                                                                                                                                                                                                                                                                                                                                                                                                                                  | Laboratorio de Apoyo a la Vigilancia e Investigación Epidemiológica - CIBO                                                                                                                                            | Laboratorio de Infectología Molecular, Departamento de Bioquímica y Medicina Molecular, Facultad de Medicina - Universidad Autónoma de Nuevo León                                                   | Alma M. Perez-Rios; Ana M. Rivas-Estilla; Blanca M. Torres; Claudia L. Charles-Niño; Daniel Arellanos-Soto; Diego A. Gonzalez-Altamirano; Hector Montoya-Fuentes; Javier Ramos-Jimenez; Jose J. Figueroa-Delgado; Kame A. Galán-Huerta; María F. Herrera-Saldivar; Natalia Martínez-Acuña; Rafael Soto-Alvarez; Sonia A. Lozano-Sepúlveda                                  |
| EPI_ISL_457969                                                                                                                                                                                                                                                                                                                                                                                                                                                                                                                                                                                   | Laboratorio de Biología Molecular Asociación Española Primera en Salud                                                                                                                                                | Departments of Pathology and Medicine, New York University School of Medicine                                                                                                                       | Adriana Heguy; Christian Marier; Gael Westby; Gonzalo Manrique; Maria Noel Zubillaga; María Victoria Elizondo; Matthew T Maurano; Paul Zappile                                                                                                                                                                                                                             |
| EPI_ISL_842652                                                                                                                                                                                                                                                                                                                                                                                                                                                                                                                                                                                   | Laboratorio de Biología Molecular Hospital Pedro de Elizalde                                                                                                                                                          | Grupo de Genómica y Bioinformática del Instituto de Investigación de la Cadena Láctea CONICET-INTA on behalf of 'Proyecto Argentino Interinstitucional de genómica de SARS-CoV-2' (PAIS Consortium) | A; AF; Alegre; Alexay; Amadio; Aulicino; B; Bressan; C; Chamorro; Claps; D; Diaz; E; Eberhardt; F; F; G; Gondolesi; Goya; Gómez; Indart; Irazoqui; J; König; L; Lorenzo; Lusso; M; ME; MF; ML; MS; Marchetti; Martin; Montoto Piazza; Morandi; N; Nabaes Jodar; Natale; Osaba; P; Paez; Rocovich; Rosales; S; Sanchez; Sueiro; Torres; Valinotto; Viegas, M.; Wenk; Zamora |
| EPI_ISL_1093146                                                                                                                                                                                                                                                                                                                                                                                                                                                                                                                                                                                  | Laboratorio de Diagnostico de Enfermedades Emergentes y Reemergentes                                                                                                                                                  | Instituto de Diagnostico y Referencia Epidemiológicos (INDRE)                                                                                                                                       | Abril Rodríguez-Maldonado; Claudia Wong-Arambula; Ernesto Ramirez-Gonzalez.; Fabiola Garces-Ayala; Gisela Barrera-Badillo; Irma Lopez-Martinez; Lucia Hernandez-Rivas; Natali Vega-Magana; Navidad Cruz-Ortiz; Tatiana Nunez-Garcia                                                                                                                                        |
| EPI_ISL_833139, EPI_ISL_1068089, EPI_ISL_1068101, EPI_ISL_1068132, EPI_ISL_1068135, EPI_ISL_1068142, EPI_ISL_1068158, EPI_ISL_1068160, EPI_ISL_1068226, EPI_ISL_1068289, EPI_ISL_1068292                                                                                                                                                                                                                                                                                                                                                                                                         |                                                                                                                                                                                                                       |                                                                                                                                                                                                     |                                                                                                                                                                                                                                                                                                                                                                            |
| see above                                                                                                                                                                                                                                                                                                                                                                                                                                                                                                                                                                                        | Laboratorio de Ecología de Doencas Transmissíveis na Amazonia, Instituto Leonidas e Maria Deane - Fiocruz Amazonia                                                                                                    | Laboratorio de Ecología de Doencas Transmissíveis na Amazonia, Instituto Leonidas e Maria Deane - Fiocruz Amazonia                                                                                  | André Corado; Debora Duarte; Felipe Naveca on behalf of the Fiocruz COVID-19 Genomic Surveillance Network; Fernanda Nascimento; George Silva; Karina Pessoa; Luciana Gonçalves; Maria Júlia Brandão; Matilde Mejía; Michele Jesus; Valdinete Nascimento; Victor Souza; Ágatha Costa                                                                                        |
| EPI_ISL_648609, EPI_ISL_961765                                                                                                                                                                                                                                                                                                                                                                                                                                                                                                                                                                   | Laboratorio de Infectología, Servicio de Infectología, Hospital Universitario Dr. José Eleuterio González - Universidad Autónoma de Nuevo León                                                                        | Laboratorio de Infectología Molecular, Departamento de Bioquímica y Medicina Molecular, Facultad de Medicina - Universidad Autónoma de Nuevo León                                                   | Adrian Camacho-Ortiz; Ana M. Rivas-Estilla; Consuelo Treviño-Garza; Daniel Arellanos-Soto; Eduardo Perez-Alba; Elvira Garza-González; Kame A. Galán-Huerta; Laura Nuzzolo-Shihadeh; Manuel E. de-la-O-Cavazos; María F. Herrera-Saldivar; Natalia Martínez-Acuña; Paola Bocanegra-Ibarias; Roberto Montes-de-Oca; Samantha M. Flores-Treviño; Sonia A. Lozano-Sepúlveda    |
| EPI_ISL_648318, EPI_ISL_648326, EPI_ISL_648327, EPI_ISL_648329, EPI_ISL_648339, EPI_ISL_648346, EPI_ISL_648366, EPI_ISL_648369                                                                                                                                                                                                                                                                                                                                                                                                                                                                   |                                                                                                                                                                                                                       |                                                                                                                                                                                                     |                                                                                                                                                                                                                                                                                                                                                                            |
| see above                                                                                                                                                                                                                                                                                                                                                                                                                                                                                                                                                                                        | Laboratorio de Investigaciones de Baney                                                                                                                                                                               | University Hospital Basel, Clinical Bacteriology                                                                                                                                                    | Adrian Egli; Alfredo Mari; Bonifacio Manguire Nlavo; Carlos Cortes; Claudia Daubenberger; Diosdado Odjama Nseng Ada; Elizabeth Nyakarungu; Guillermo Garcia; Helena Seth-Smith; Madlen Stange; Maximilian Mpin; Mitoha Ondo O Ayekaba; Philip Wonder Phiri; Salome Hosch; Tim Roloff; Tobias Schindler                                                                     |
| EPI_ISL_1111070, EPI_ISL_1111409, EPI_ISL_1111431                                                                                                                                                                                                                                                                                                                                                                                                                                                                                                                                                | Laboratorio de Referencia Nacional de Enteropatógenos. Instituto Nacional de Salud del Perú                                                                                                                           | Laboratorio de Referencia Nacional de Enteropatógenos. Instituto Nacional de Salud del Perú                                                                                                         | Fiorella Orellana Peralta; Iris Silva Molina; Junior Caro Castro; Ronnie Gavilan Chavez; Veronica Hurtado Vela; Willi Quino Sifuentes                                                                                                                                                                                                                                      |
| EPI_ISL_943570, EPI_ISL_1092331, EPI_ISL_1093156, EPI_ISL_1093163, EPI_ISL_1093166                                                                                                                                                                                                                                                                                                                                                                                                                                                                                                               | Laboratorio de Referencia Nacional de Virus Respiratorio. Instituto Nacional de Salud Perú                                                                                                                            | Laboratorio de Referencia Nacional de Biotecnología y Biología Molecular. Instituto Nacional de Salud Perú                                                                                          | Carlos Padilla Rojas; Henri Bailon Calderon; Johanna Balbuena Torrez; Karolyn Vega Chozo; Marc Barcena; Marco Galarza Perez; Maribel Huaringa Nuñez; Nancy Rojas Serrano; Omar Caceres Rey; Priscila Lope Pari                                                                                                                                                             |
| EPI_ISL_1111069, EPI_ISL_1111133, EPI_ISL_1111140, EPI_ISL_1111144, EPI_ISL_1111154, EPI_ISL_1111173, EPI_ISL_1111246, EPI_ISL_1111281, EPI_ISL_1111282, EPI_ISL_1111283, EPI_ISL_1111286, EPI_ISL_1111289, EPI_ISL_1111295, EPI_ISL_1111309, EPI_ISL_1111312, EPI_ISL_1111328, EPI_ISL_1111330, EPI_ISL_1111331, EPI_ISL_1111334, EPI_ISL_1111335, EPI_ISL_1111338, EPI_ISL_1111349, EPI_ISL_1111351, EPI_ISL_1111353, EPI_ISL_1111359, EPI_ISL_1111367, EPI_ISL_1111452, EPI_ISL_1111462, EPI_ISL_1111466, EPI_ISL_1111481, EPI_ISL_1111492, EPI_ISL_1111493, EPI_ISL_1111497, EPI_ISL_1111498 |                                                                                                                                                                                                                       |                                                                                                                                                                                                     |                                                                                                                                                                                                                                                                                                                                                                            |
| see above                                                                                                                                                                                                                                                                                                                                                                                                                                                                                                                                                                                        | Laboratorio de Referencia Nacional de Virus Respiratorio. Instituto Nacional de Salud Perú                                                                                                                            | Laboratorio de Referencia Nacional de Enteropatógenos. Instituto Nacional de Salud del Perú                                                                                                         | Fiorella Orellana Peralta; Iris Silva Molina; Junior Caro Castro; Ronnie Gavilan Chavez; Veronica Hurtado Vela; Willi Quino Sifuentes                                                                                                                                                                                                                                      |
| EPI_ISL_540933, EPI_ISL_540942, EPI_ISL_540944, EPI_ISL_540953, EPI_ISL_540965, EPI_ISL_540966, EPI_ISL_729864, EPI_ISL_729868, EPI_ISL_729882, EPI_ISL_729883, EPI_ISL_729885, EPI_ISL_812443, EPI_ISL_812455, EPI_ISL_812459, EPI_ISL_812470, EPI_ISL_812474, EPI_ISL_812475, EPI_ISL_812476, EPI_ISL_812483, EPI_ISL_812488, EPI_ISL_812489, EPI_ISL_812491, EPI_ISL_812503, EPI_ISL_812509, EPI_ISL_812512, EPI_ISL_812513, EPI_ISL_812515, EPI_ISL_812718, EPI_ISL_812720                                                                                                                   |                                                                                                                                                                                                                       |                                                                                                                                                                                                     |                                                                                                                                                                                                                                                                                                                                                                            |
| see above                                                                                                                                                                                                                                                                                                                                                                                                                                                                                                                                                                                        | Laboratorio de Referencia Nacional de Virus Respiratorios, Instituto Nacional de Salud Peru                                                                                                                           | Laboratorio de Genómica Microbiana, Universidad Peruana Cayetano Heredia                                                                                                                            | Alejandra Dávila-Barclay; Brenda Ayzanoa; Camila Castillo-Vilcahuaman; Camila Castillo-Vilcahuamán; Guillermo Salvatierra; Janet Huancachoque; Luis González; Marco Galarza; Maribel Huaringa; Nancy Rojas; Oscar Escalante; Pablo Tsukayama; Pedro E. Romero; Pool Marcos; Priscila Lope                                                                                  |
| EPI_ISL_1092005                                                                                                                                                                                                                                                                                                                                                                                                                                                                                                                                                                                  | Laboratorio de Salud Publica de Cesar                                                                                                                                                                                 | Instituto Nacional de Salud- Dirección de Investigación en Salud Pública                                                                                                                            | Carlos Franco-Muñoz; Diego A. Álvarez-Díaz; Diego Andrés Prada; Gerardo Santamaría; Hector Alejandro Ruiz-Moreno; Jhonnatan Reales-González; Julian Naizaque; Katherine Laiton-Donato; Magdalena Wiesner; Marcela Mercado-Reyes; María T. Herrera-Sepúlveda; Martha Lucia Ospina Martinez; Sheryll Corchuelo                                                               |
| EPI_ISL_845635, EPI_ISL_845638, EPI_ISL_845641                                                                                                                                                                                                                                                                                                                                                                                                                                                                                                                                                   | Laboratorio de Salud Pública - Secretaría Distrital de Salud                                                                                                                                                          | Instituto Nacional de Salud - Dirección de Investigación en Salud Pública                                                                                                                           | Carlos Franco-Muñoz; Diego A. Álvarez-Díaz; Diego Andrés Prada; Gerardo Santamaría; Jonathan Reales; Julian Naizaque; Katherine Laiton-Donato; Magdalena Wiesner; Marcela Mercado-Reyes; María T. Herrera-Sepúlveda; Martha Lucia Ospina Martinez; Mauricio Pacheco-Montealegre; Paola Muñoz-Laiton; Sheryll Corchuelo                                                     |
| EPI_ISL_1017701                                                                                                                                                                                                                                                                                                                                                                                                                                                                                                                                                                                  | Laboratorio de Salud Pública de Boyacá                                                                                                                                                                                | Instituto Nacional de Salud- Dirección de Investigación en Salud Pública                                                                                                                            | Carlos Franco-Muñoz; Diego A. Álvarez-Díaz; Diego Andrés Prada; Gerardo Santamaría; Hector Alejandro Ruiz-Moreno; Jhonnatan Reales-González; Julian Naizaque; Katherine Laiton-Donato; Magdalena Wiesner; Marcela Mercado-Reyes; María T. Herrera-Sepúlveda; Martha Lucia Ospina Martinez; Sheryll Corchuelo                                                               |
| EPI_ISL_792364                                                                                                                                                                                                                                                                                                                                                                                                                                                                                                                                                                                   | Laboratorio de Virología - HIEAyC San Juan de Dios                                                                                                                                                                    | Área de Secuenciación del Laboratorio de Virología del Hospital de Niños Dr. Ricardo Gutierrez on behalf of 'Proyecto Argentino Interinstitucional de genómica de SARS-CoV-2' (PAIS Consortium)     | A; Colmeiro; Ercole; Ferioli; Gatelli; Goya; LE; Lusso; M; MI; MS; Nabaes Jodar; Natale; R; S; Valinotto; Viegas, M.                                                                                                                                                                                                                                                       |
| EPI_ISL_623123, EPI_ISL_717831, EPI_ISL_717853, EPI_ISL_717869, EPI_ISL_717889, EPI_ISL_717940, EPI_ISL_717941, EPI_ISL_717942, EPI_ISL_717951                                                                                                                                                                                                                                                                                                                                                                                                                                                   |                                                                                                                                                                                                                       |                                                                                                                                                                                                     |                                                                                                                                                                                                                                                                                                                                                                            |
| see above                                                                                                                                                                                                                                                                                                                                                                                                                                                                                                                                                                                        | Laboratorio de Virología Molecular / UFRJ                                                                                                                                                                             | Bioinformatics Laboratory / LNCC                                                                                                                                                                    | Alexandra L Gerber; Amílcar Tanuri; Ana Paula de C Guimarães; Ana Tereza R de Vasconcelos; Andréa Cony Cavalcanti; Carolina M Voloch; Claudia dos                                                                                                                                                                                                                          |

|                                                                                                                                                                                                                                                                                                                                                    |                                                                                                                                                                            |                                                                                                                                                                                                                                           |                                                                                                                                                                                                                                                                                                                                                                                                                                                                                               |
|----------------------------------------------------------------------------------------------------------------------------------------------------------------------------------------------------------------------------------------------------------------------------------------------------------------------------------------------------|----------------------------------------------------------------------------------------------------------------------------------------------------------------------------|-------------------------------------------------------------------------------------------------------------------------------------------------------------------------------------------------------------------------------------------|-----------------------------------------------------------------------------------------------------------------------------------------------------------------------------------------------------------------------------------------------------------------------------------------------------------------------------------------------------------------------------------------------------------------------------------------------------------------------------------------------|
| EPI_ISL_792522, EPI_ISL_792523, EPI_ISL_792524                                                                                                                                                                                                                                                                                                     | Laboratorio de Virología del Hospital de Niños Dr. Ricardo Gutierrez                                                                                                       | Grupo de Genómica y Bioinformática del Instituto de Investigación de la Cadena Láctea CONICET-INTA on behalf of 'Proyecto Argentino Interinstitucional de genómica de SARS-CoV-2' (PAIS Consortium)                                       | Santos Rodrigues; Covid19-UFRJ Workgroup; Cynthia C Cardoso; Diana Mariani; Luiz G P de Almeida; Luís Cristóvão Pôrto; Orlando C. Ferreira; Otavio Bustrolini; Otavio J. Brustolini; Renato S Aguiar; Ronaldo S Francisco Jr; Ronaldo da Silva F Jr; Terezinha M P P Castiñeira; Terezinha M P P Castiñeiras; AF; AS; Acevedo; Alexay; Alvarez Lopez; Amadio; Aulicino; C; Eberhardt; G; Goya; Irazoqui; Jacques; König; M; ME; MF; MS; Mistchenko; Nabaes Jodar; O; P; S; Torres; Viegas, M. |
| EPI_ISL_430801, EPI_ISL_792179                                                                                                                                                                                                                                                                                                                     | Laboratorio de Virología del Hospital de Niños Dr. Ricardo Gutierrez                                                                                                       | Área de Secuenciación del Laboratorio de Virología del Hospital de Niños Dr. Ricardo Gutierrez on behalf of 'Proyecto Argentino Interinstitucional de genómica de SARS-CoV-2' (PAIS Consortium)                                           | AS; Acevedo; Alexay; Alvarez Lopez; C; E; Goya; Gravis; Jacques; LE; Lusso; ME; MI; MS; Mistchenko; Nabaes Jodar; Natale; O; S; Valinotto; Viegas, M.                                                                                                                                                                                                                                                                                                                                         |
| EPI_ISL_956300                                                                                                                                                                                                                                                                                                                                     | Laboratorio de salud publica Arauca                                                                                                                                        | Instituto Nacional de Salud- Dirección de Investigación en Salud Pública                                                                                                                                                                  | Carlos Franco-Muñoz; Diego A. Álvarez-Díaz; Diego Andrés Prada; Gerardo Santamaría; Hector Alejandro Ruiz-Moreno; Jhonnatan Reales-González; Julian Naizaque; Katherine Laiton-Donato; Magdalena Wiesner; Marcela Mercado-Reyes; Maria T. Herrera-Sepúlveda; Martha Lucia Ospina Martinez; Mauricio Pacheco-Montealegre; Sheryll Corchuelo                                                                                                                                                    |
| EPI_ISL_1091923                                                                                                                                                                                                                                                                                                                                    | Laboratorio de salud público de Atlantico                                                                                                                                  | Instituto Nacional de Salud- Dirección de Investigación en Salud Pública                                                                                                                                                                  | Carlos Franco-Muñoz; Diego A. Álvarez-Díaz; Diego Andrés Prada; Gerardo Santamaría; Hector Alejandro Ruiz-Moreno; Jhonnatan Reales-González; Julian Naizaque; Katherine Laiton-Donato; Magdalena Wiesner; Marcela Mercado-Reyes; Maria T. Herrera-Sepúlveda; Martha Lucia Ospina Martinez; Sheryll Corchuelo                                                                                                                                                                                  |
| EPI_ISL_792306, EPI_ISL_792314                                                                                                                                                                                                                                                                                                                     | Laboratorio del Hospital El Cruce Dr. Néstor C. Kirchner                                                                                                                   | Área de Secuenciación del Laboratorio de Virología del Hospital de Niños Dr. Ricardo Gutierrez on behalf of 'Proyecto Argentino Interinstitucional de genómica de SARS-CoV-2' (PAIS Consortium)                                           | Goya; LE; Lusso; M; MI; MS; Nabaes Jodar; Natale; Rahhal; S; Valinotto; Viegas, M.; Zubieta                                                                                                                                                                                                                                                                                                                                                                                                   |
| EPI_ISL_792525                                                                                                                                                                                                                                                                                                                                     | Laboratorio del Hospital Interzonal General de Agudos Evita                                                                                                                | Grupo de Genómica y Bioinformática del Instituto de Investigación de la Cadena Láctea CONICET-INTA on behalf of 'Proyecto Argentino Interinstitucional de genómica de SARS-CoV-2' (PAIS Consortium)                                       | AF; Alexay; Amadio; Aulicino; C; Desimone; E; Eberhardt; G; Goya; Grossi; I; Irazoqui; König; L; Luczac; M; MF; MS; Musto; Nabaes Jodar; O; P; S; Serrano; Torres; Viegas, M.                                                                                                                                                                                                                                                                                                                 |
| EPI_ISL_792455                                                                                                                                                                                                                                                                                                                                     | Laboratorio del Hospital Regional Ushuaia Gdor. Ernesto Campos                                                                                                             | Hospital Regional Ushuaia - Centro Austral De Investigaciones Cientificas - Universidad Nacional De Tierra Del Fuego on behalf of 'Proyecto Argentino Interinstitucional de genómica de SARS-CoV-2' (PAIS Consortium)                     | Boutureira, MF.; CA; CB; CF; Castro; Ceballos; Cáceres; De Roccis; F; G; Gallego; Gramundi; ID; Nardi; SB; SG; Yulan                                                                                                                                                                                                                                                                                                                                                                          |
| EPI_ISL_961466                                                                                                                                                                                                                                                                                                                                     | Laboratorios Lister                                                                                                                                                        | Instituto de Diagnostico y Referencia Epidemiologicos (INDRE)                                                                                                                                                                             | Abril Rodriguez-Maldonado; Claudia Wong-Arambula; Ernesto Ramirez-Gonzalez.; Fabiola Garces-Ayala; Gisela Barrera-Badillo; Irma Lopez-Martinez; Lucia Hernandez-Rivas; Natividad Cruz-Ortiz; Tatiana Nunez-Garcia                                                                                                                                                                                                                                                                             |
| EPI_ISL_882961                                                                                                                                                                                                                                                                                                                                     | Laboratorium Diagnostyi Mikrobiologicznej z Pracowni Prtka Grulicy SPSzW im. Jana Boego w Lublinie                                                                         | National Institute of Public Health - National Institute of Hygiene                                                                                                                                                                       | Gawor Jan; Wokowicz Tomasz; Zacharczuk Katarzyna                                                                                                                                                                                                                                                                                                                                                                                                                                              |
| EPI_ISL_905753                                                                                                                                                                                                                                                                                                                                     | Laboratorium Mikrobiologiczne SYNEVO                                                                                                                                       | National Institute of Public Health - National Institute of Hygiene                                                                                                                                                                       | Wokowicz Tomasz; Zacharczuk Katarzyna                                                                                                                                                                                                                                                                                                                                                                                                                                                         |
| EPI_ISL_1020845, EPI_ISL_1021241, EPI_ISL_1021297, EPI_ISL_1021684, EPI_ISL_1021807, EPI_ISL_1026089, EPI_ISL_1029482, EPI_ISL_1029816, EPI_ISL_1030506, EPI_ISL_1030527, EPI_ISL_1030894, EPI_ISL_1032148, EPI_ISL_1038514, EPI_ISL_1038523, EPI_ISL_1038553, EPI_ISL_1038638, EPI_ISL_1038735, EPI_ISL_1038761, EPI_ISL_1038768, EPI_ISL_1038787 | see above                                                                                                                                                                  | Respiratory Viruses Branch, Division of Viral Diseases, Centers for Disease Control and Prevention                                                                                                                                        | Ben L. Rambo-Martin; Clinton R. Paden; Dakota Howard; Dhvani Batra; Duncan MacCannell; Peter W. Cook; Suxiang Tong                                                                                                                                                                                                                                                                                                                                                                            |
| EPI_ISL_904008                                                                                                                                                                                                                                                                                                                                     | Laboratory Diagnostic, Veterinary Specialized Institute Kraljevo                                                                                                           | Laboratory Diagnostic, Veterinary Specialized Institute Kraljevo                                                                                                                                                                          | Afonso, C.; Banovic Djeri, B.; Jankovic, M.; Jovanovic, T.; Knezevic, A.; Petrovic, T.; Sekler, M.; Tesovic, B.; Vidanovic, D.; Volkening, J.                                                                                                                                                                                                                                                                                                                                                 |
| EPI_ISL_754906                                                                                                                                                                                                                                                                                                                                     | Laboratory Diagnostics and Clinical Immunology of Developmental Age, Medical University of Warsaw                                                                          | genXone SA, Research & Development Laboratory; The Faculty of Mathematics, Informatics and Mechanics of the University of Warsaw                                                                                                          | Anna Gambin; Grzegorz Nowicki; Jakub Grabowski; Maciej Sykulski; Micha Kaszuba; Monika Makowska-Woniak; Natalia Drwska-Matelska; Urszula Demkow; ukasz Krych                                                                                                                                                                                                                                                                                                                                  |
| EPI_ISL_415741, EPI_ISL_415743, EPI_ISL_452179, EPI_ISL_660543, EPI_ISL_660545, EPI_ISL_667809, EPI_ISL_956317, EPI_ISL_956318, EPI_ISL_956328, EPI_ISL_956329                                                                                                                                                                                     | see above                                                                                                                                                                  | Department of Laboratory Medicine, Lin-Kou Chang Gung Memorial Hospital, Taoyuan, Taiwan                                                                                                                                                  | Cheng-Hsun Chiu; Cheng-Ta Yang; Chi-Hsien Huang; Chung-Guei Huang; Guang-Wu Chen; Kuang-Tso Le; Kuo-Chien Tsao; Kuo-Ming Lee; Mei-Jen Hsiao; Peng-Nien Huang; Po-Wei Huang; Shin-Ru Shih; Shu-Li Yang; Shu-Min Lin; Yi-Chun Liu; Yu-Nong Gong                                                                                                                                                                                                                                                 |
| EPI_ISL_411915                                                                                                                                                                                                                                                                                                                                     | Laboratory Medicine                                                                                                                                                        | Department of Laboratory Medicine, Lin-Kou Chang Gung Memorial Hospital, Taoyuan, Taiwan.                                                                                                                                                 | Chung-Guei Huang; Kuo-Chien Tsao; Shin-Ru Shih; Shu-Li Yang; Yhu-Chering Huang; Yi-Chun Li; Yu-Nong Gong                                                                                                                                                                                                                                                                                                                                                                                      |
| EPI_ISL_1017690                                                                                                                                                                                                                                                                                                                                    | Laboratory for COVID19 diagnostics, Clinical Centre of Serbia                                                                                                              | Institute of microbiology and Immunology, Faculty of Medicine, University of Belgrade                                                                                                                                                     | Jankovic, M.; Jovanovic, T.; Knezevic, A.; Miiicevic, O.; Sekler, M.; Tesovic, B.; Vidanovic, D.                                                                                                                                                                                                                                                                                                                                                                                              |
| EPI_ISL_933533                                                                                                                                                                                                                                                                                                                                     | Laboratory for HIV and opportunistic infections diagnosis The Republican Research and Practical Center for Epidemiology and Microbiology (RRPCEM)                          | Laboratory for HIV and opportunistic infections diagnosis The Republican Research and Practical Center for Epidemiology and Microbiology (RRPCEM)                                                                                         | Artur Akhremchuk; Elena Gasich; Kirill Bulda; Leonid Valentovich; Vladimir Gorbunov                                                                                                                                                                                                                                                                                                                                                                                                           |
| EPI_ISL_910029                                                                                                                                                                                                                                                                                                                                     | Laboratory for Respiratory Viruses, Cantacuzino National Military-Medical Institute for Research and Development                                                           | Cantacuzino Institute Virology                                                                                                                                                                                                            | Luiza Ustea; Mihaela Lazar; Nicoleta Paraschiv                                                                                                                                                                                                                                                                                                                                                                                                                                                |
| EPI_ISL_471424                                                                                                                                                                                                                                                                                                                                     | Laboratory for Respiratory Viruses, National Influenza Centre, Cantacuzino National Military-Medical Institute for Research and Development                                | Cantacuzino Institute                                                                                                                                                                                                                     | Luiza Ustea; Mihaela Lazar; Nicoleta Paraschiv; Tim Durfee                                                                                                                                                                                                                                                                                                                                                                                                                                    |
| EPI_ISL_435047                                                                                                                                                                                                                                                                                                                                     | Laboratory of Applied Genetics                                                                                                                                             | RSE "National Center for Biotechnology"                                                                                                                                                                                                   | Alexandr Shevtsov; Asylulan Amirgazin; Ilyas Akhmetollayev; Ruslan Kalendar; Viktoriya Lutsay; Yerlan Ramanculov                                                                                                                                                                                                                                                                                                                                                                              |
| EPI_ISL_1098895                                                                                                                                                                                                                                                                                                                                    | Laboratory of Communicable Diseasea                                                                                                                                        | Laboratory of Communicable Diseasea                                                                                                                                                                                                       | Liidia Dotsenko                                                                                                                                                                                                                                                                                                                                                                                                                                                                               |
| EPI_ISL_1020323, EPI_ISL_1101253                                                                                                                                                                                                                                                                                                                   | Laboratory of Communicable Diseases                                                                                                                                        | Laboratory of Communicable Diseases                                                                                                                                                                                                       | Liidia Dotsenko                                                                                                                                                                                                                                                                                                                                                                                                                                                                               |
| EPI_ISL_760246, EPI_ISL_1096336                                                                                                                                                                                                                                                                                                                    | Laboratory of Genetics and Personalized Medicine, Zan Mitrev Clinic                                                                                                        | Laboratory of Genetics and Personalized Medicine, Zan Mitrev Clinic                                                                                                                                                                       | 2020; Kungulovski G. et al.; Kungulovski et al.                                                                                                                                                                                                                                                                                                                                                                                                                                               |
| EPI_ISL_717979                                                                                                                                                                                                                                                                                                                                     | Laboratory of Microbiology and Infectious Diseases, Faculty of Veterinary Medicine, Aristotle University of Thessaloniki, University Campus, 541 24, Thessaloniki, Greece. | Laboratory of Biology, Department of Medicine, Democritus University of Thrace, Alexandroupolis, Greece                                                                                                                                   | Bampali M.; Chaintoutis S.; Dimitriou M.; Dovas C.; Dovolris N.; Karakasiliotis I.                                                                                                                                                                                                                                                                                                                                                                                                            |
| EPI_ISL_427043, EPI_ISL_437910                                                                                                                                                                                                                                                                                                                     | Laboratory of Microbiology, Medical School, National and Kapodistrian University of Athens                                                                                 | Laboratory of Biology, Department of Medicine, Democritus University of Thrace                                                                                                                                                            | Bampali, M.; Dovolris, N.; Froukala, E.; Gatzidou, E.; Kassela K.; N. and Karakasiliotis, I.; Spanakis; Stavropoulou, A.; Tsakris, A.; Veletza, S.                                                                                                                                                                                                                                                                                                                                            |
| EPI_ISL_654017, EPI_ISL_654018, EPI_ISL_654019                                                                                                                                                                                                                                                                                                     | Laboratory of Microbiology, National Reference Lab, Charles Nicolle Hospital; 2-University of Tunis ElManar, Faculty of Medicine of Tunis, LR99ES09, Tunis, Tunisia        | 1-Clinical and Experimental Pharmacology Lab, LR18SP02, National Center of Pharmacovigilance, University of Tunis El Manar, Tunis, Tunisia. 2-Neurodegenerative diseases and psychiatric troubles, LR18SP03, Razi Hospital, University of | Alia Ben Kahla; Gaies Emna; Ilhem Boutiba-Ben Boubaker; Imen Kacem; Imen Mkada; Jalila Ben Kheili; Maher Kharrat; Mouna Ben Sassi; Mouna Safer; Nissaf Ben Alaya; Riadh Daghfous; Riadh Gouider.; Salma Abid; Sameh Trabelsi; Sana Ferjani; Soumaya Rammeh                                                                                                                                                                                                                                    |

|                                                                                                                                                |                                                                                                                                                                     |                                                                                                                                                                                                                                                                                                                                                                        |                                                                                                                                                                                                                                                                                                                                                                                                                                                                                                                                                           |
|------------------------------------------------------------------------------------------------------------------------------------------------|---------------------------------------------------------------------------------------------------------------------------------------------------------------------|------------------------------------------------------------------------------------------------------------------------------------------------------------------------------------------------------------------------------------------------------------------------------------------------------------------------------------------------------------------------|-----------------------------------------------------------------------------------------------------------------------------------------------------------------------------------------------------------------------------------------------------------------------------------------------------------------------------------------------------------------------------------------------------------------------------------------------------------------------------------------------------------------------------------------------------------|
|                                                                                                                                                |                                                                                                                                                                     | Tunis El Manar, Tunis, Tunisia. 3- Ministry of Health, National Observatory of New and Emerging Diseases, 1006, Tunis, Tunisia                                                                                                                                                                                                                                         |                                                                                                                                                                                                                                                                                                                                                                                                                                                                                                                                                           |
| EPI_ISL_796782, EPI_ISL_803119, EPI_ISL_803120, EPI_ISL_803430, EPI_ISL_803851                                                                 | Laboratory of Microbiology, National Reference Lab, Charles Nicolle Hospital; 2-University of Tunis ElManar, Faculty of Medicine of Tunis, LR99ES09, Tunis, Tunisia | Clinical and Experimental Pharmacology Lab, LR16SP02, National Center of Pharmacovigilance, University of Tunis El Manar, Tunis, Tunisia. 2-Neurodegenerative diseases and psychiatric troubles, LR18SP03, Razi Hospital, University of Tunis El Manar, Tunis, Tunisia. 3- Ministry of Health, National Observatory of New and Emerging Diseases, 1006, Tunis, Tunisia | Ahmed Fakhfakh; Alia BenKahla; Gaies Emna; Guedi Ali Barreh; Habiba Ben Romdhane; Hanen El Jebari; Ilhem Boutiba-Ben Boubaker; Jallia Ben Khelil; Maher Kharrat; Mouna Ben Sassi; Mouna Safer; Nissaf Ben Alaya; Riadh Daghfous; Riadh Gouider.; Saima Abid; Sameh Trabelsi; Sana Ferjani; Sarra Chamman; Souissi Amira; Zaineb Hamzaoui                                                                                                                                                                                                                  |
| EPI_ISL_875970, EPI_ISL_875979, EPI_ISL_875988, EPI_ISL_876016, EPI_ISL_876019                                                                 | Laboratory of Molecular Biology, Diagnostyka sp. z o.o.                                                                                                             | genXone SA, Research & Development Laboratory                                                                                                                                                                                                                                                                                                                          | Grzegorz Nowicki; Jakub Grabowski; Maciej Sykulski; Micha Kaszuba; Monika Makowska-Woniak; Natalia Drwska-Matelska; ukasz Krych                                                                                                                                                                                                                                                                                                                                                                                                                           |
| EPI_ISL_801565, EPI_ISL_801627, EPI_ISL_801656, EPI_ISL_801717, EPI_ISL_801729, EPI_ISL_801746, EPI_ISL_801819, EPI_ISL_801840                 | see above                                                                                                                                                           | Laboratory of Molecular Virology, Pontificia Universidad Católica de Chile                                                                                                                                                                                                                                                                                             | MSSH Pathogen Surveillance Program                                                                                                                                                                                                                                                                                                                                                                                                                                                                                                                        |
|                                                                                                                                                |                                                                                                                                                                     |                                                                                                                                                                                                                                                                                                                                                                        | Adolfo Garcia-Sastre; Adriana van De Guchte; Ajay Obla; Aldo Gaggero; Ana María Contreras; Ana S. Gonzalez-Reiche; Bremy Albuquerque; Carlos Palma; Constanza Maldonado; Edward C. Holmes; Eileen Serrano; Erick Salinas; Fernando Valiente; Hala Alshammary; Harm van Bakel; Jayeeta Dutta; Jorge Levican; Juan Soto; Leonardo I. Almonacid; M. Belen Leyton; Manuel Ampuero; Marcela Ferrer; Matthew M. Hernandez; Melissa Smith; Rafael A. Medina.; Robert Sebra; Shwetha Hara Sridhar; Tamara Garcia-Salum; Viviana Simon; Ying-Chih Wang; Zenab Khan |
| EPI_ISL_939650                                                                                                                                 | Laboratory of Virology and Molecular Diagnostics                                                                                                                    | Institute of Public Health of Republic of North Macedonia Laboratory of Virology and Molecular Diagnostics                                                                                                                                                                                                                                                             | Elizabeta Janchevska; Golubinka Boshevska; Maja Kuzmanovska                                                                                                                                                                                                                                                                                                                                                                                                                                                                                               |
| EPI_ISL_984654                                                                                                                                 | Laboratory of Virology of Federal Budget Health Care Institution Center of Hygiene and Epidemiology in Arkhangelsk region                                           | Group of Genomics and Postgenomic Technologies of Central Research Institute of Epidemiology                                                                                                                                                                                                                                                                           | Akimkin VG; Bulanenko VP; Kaptelova VV; Kondrasheva LV; Korneenko EV; Ponomareva YA; Saenko SS; Sarnoilov AE; Semyina LV; Shishko LA; Speranskaya AS; Tivanova EV; Valdokhina AV                                                                                                                                                                                                                                                                                                                                                                          |
| EPI_ISL_454585                                                                                                                                 | Laboratory of virology, National Center of Expertise                                                                                                                | Laboratory of molecular-genetic research, National Center for Expertise, Kazakhstan National Center for Biotechnology, Kazakhstan                                                                                                                                                                                                                                      | ; Abdaliyev Askar; Akhmetollayev Ilyas; Amirgazin Asylulan; Aushakhmetova Zabira; Kalendar Ruslan; Lutsay Viktoriya; Rakhmetova Akbota; Ramankulov Yerlan; Shevtsov Alexandr                                                                                                                                                                                                                                                                                                                                                                              |
| EPI_ISL_454604                                                                                                                                 | Laboratory of virology, National Center of Expertise                                                                                                                | Laboratory of molecular-genetic research, National Center for Expertise, Kazakhstan National Center for Biotechnology, Kazakhstan                                                                                                                                                                                                                                      | ; Abdaliyev Askar; Akhmetollayev Ilyas; Amirgazin Asylulan; Aushakhmetova Zabira; Kalendar Ruslan; Lutsay Viktoriya; Rakhmetova Akbota; Ramankulov Yerlan; Shevtsov Alexandr                                                                                                                                                                                                                                                                                                                                                                              |
| EPI_ISL_454580                                                                                                                                 | Laboratory of virology, National Center of Expertise                                                                                                                | Laboratory of molecular-genetic research, National Center of Expertise, Kazakhstan National Center for Biotechnology, Kazakhstan                                                                                                                                                                                                                                       | ; Abdaliyev Askar; Akhmetollayev Ilyas; Amirgazin Asylulan; Aushakhmetova Zabira; Kalendar Ruslan; Lutsay Viktoriya; Rakhmetova Akbota; Ramankulov Yerlan; Shevtsov Alexandr                                                                                                                                                                                                                                                                                                                                                                              |
| EPI_ISL_576119                                                                                                                                 | Laboratory, The Bio Arte Limited                                                                                                                                    | Laboratory, The Bio Arte Limited                                                                                                                                                                                                                                                                                                                                       | Biazzo, M.; Madeddu, S.; Pinzauti, D.; Santoro, F.                                                                                                                                                                                                                                                                                                                                                                                                                                                                                                        |
| EPI_ISL_427293                                                                                                                                 | Laboratório Central de Saúde Pública Professor Gonçalo Moniz (LACEN-BA)                                                                                             | Laboratory of Respiratory Viruses and Measles, Oswaldo Cruz Institute, FIOCRUZ                                                                                                                                                                                                                                                                                         | Aline Mattos; Braulia Caetano; Cristiana Garcia; Fernando Motta; Jonathan Lopes; Luciana Appolinario; Maria Ogrzewalska; Marilda Siqueira on behalf of the Fiocruz COVID-19 Genomic Surveillance Network; Milene Miranda; Paola Resende; Priscila Born; Sunando Roy                                                                                                                                                                                                                                                                                       |
| EPI_ISL_792596, EPI_ISL_792603, EPI_ISL_792609                                                                                                 | Laboratório Central de Saúde Pública do Estado da Paraíba (LACEN-PB)                                                                                                | Laboratory of Respiratory Viruses and Measles, Oswaldo Cruz Institute, FIOCRUZ                                                                                                                                                                                                                                                                                         | Ana Carolina Mendonca; Anna Carolina Paixão; Dalane Loudal Florentino Teixeira; Fernando Motta; João Felipe Bezerra; Luciana Appolinario; Marilda Siqueira on behalf of the Fiocruz COVID-19 Genomic Surveillance Network; Paola Resende; Romero Henrique Teixeira de Vasconcelos; Thiago Franco de Oliveira Carneiro                                                                                                                                                                                                                                     |
| EPI_ISL_792639                                                                                                                                 | Laboratório Central de Saúde Pública do Estado de Alagoas (LACEN-AL)                                                                                                | Laboratory of Respiratory Viruses and Measles, Oswaldo Cruz Institute, FIOCRUZ                                                                                                                                                                                                                                                                                         | Ana Carolina Mendonca; Anderson Brandao Leite; Anna Carolina Paixão; Fernando Motta; Luciana Appolinario; Marilda Siqueira on behalf of the Fiocruz COVID-19 Genomic Surveillance Network; Paola Resende                                                                                                                                                                                                                                                                                                                                                  |
| EPI_ISL_729812                                                                                                                                 | Laboratório Central de Saúde Pública do Estado do Rio Grande do Sul (LACEN-RS)                                                                                      | Laboratory of Respiratory Viruses and Measles, Oswaldo Cruz Institute, FIOCRUZ                                                                                                                                                                                                                                                                                         | Ana Carolina Mendonça; Anna Carolina Paixão; Fernando Motta; Luciana Appolinario; Marilda Siqueira on behalf of the Fiocruz COVID-19 Genomic Surveillance Network; Marilda Tereza Mar da Rosa; Paola Resende; Tatiana Schaffer Gregiani                                                                                                                                                                                                                                                                                                                   |
| EPI_ISL_1133258, EPI_ISL_1133259, EPI_ISL_1133269, EPI_ISL_1133270                                                                             | Laboratório Hermes Pardini                                                                                                                                          | Laboratório de Biologia Integrativa, Instituto de Ciências Biológicas, Universidade Federal de Minas Gerais                                                                                                                                                                                                                                                            | Alessandro Clayton de Souza Ferreira; Aline Brito de Lima; Carolina Moreira Voloch; Daniel Costa Queiroz; Danielle Alves Gomes Zauli; Diego Menezes Bonfim; Filipe Romero Rebelo Moreira; Frederico Scott Varella Malta; Joice do Prado Silva; Rafael Marques de Souza; Renan Pedra de Souza; Renato Santana Aguiar.; Renann Garcias Moreira; Victor Cavalcanti Pardini; Victor Emmanuel Viana Geddes; Wagner Carlos Santos Magalhães; Walyson Coelho Costa                                                                                               |
| EPI_ISL_693223                                                                                                                                 | Laboratório Municipal de Piracicaba                                                                                                                                 | Instituto Adolfo Lutz, Interdisciplinary Procedures Center, Strategic Laboratory                                                                                                                                                                                                                                                                                       | Claudia Regina Gonçalves; Claudio Tavares Sacchi; Erica Valessa Ramos Gomes; Karoline Rodrigues Campos                                                                                                                                                                                                                                                                                                                                                                                                                                                    |
| EPI_ISL_770551, EPI_ISL_770553, EPI_ISL_770559, EPI_ISL_770570, EPI_ISL_770589, EPI_ISL_770606, EPI_ISL_770629, EPI_ISL_770630, EPI_ISL_779166 | see above                                                                                                                                                           | Laboratório de Microbiologia Molecular - Universidade FEEVALE                                                                                                                                                                                                                                                                                                          | Bioinformatics Laboratory / LNCC                                                                                                                                                                                                                                                                                                                                                                                                                                                                                                                          |
|                                                                                                                                                |                                                                                                                                                                     |                                                                                                                                                                                                                                                                                                                                                                        | Alana Witt Hansen; Alessandra Pavan Lamarca da Silva; Alexandra L Gerber; Ana Karolina Eisen Antunes; Ana Luiza Ziulkoski; Ana Paula de C Guimarães; Ana Tereza R de Vasconcelos; Bruna Hermann; Fagner Henrique Heldt; Felipe Benites; Fernando Rosado Spilki; Juliana Schons; Juliane Deise Fleck; Karoline Schallenberger; Larissa Mallmann; Luiz G P de Almeida; Matheus Nunes Weber; Meriane Demoliner; Paula Rodrigues de Almeida; Ronaldo da Silva F Jr; Vytoria Goes                                                                              |
| EPI_ISL_1004233                                                                                                                                | Laboratório de Virologia - Instituto de Medicina Tropical - Universidade de São Paulo                                                                               | Laboratório de Parasitologia Médica - Instituto de Medicina Tropical - Universidade de São Paulo                                                                                                                                                                                                                                                                       | Alvina Clara Felix; Anderson de Paula; Brazil-UK Centre for Arbovirus Discovery Diagnosis Genomics and Epidemiology (CADDE) Genomic Network - Instituto de Medicina Tropical; Camilla Malta Romano; Darlan Candido; Esmeria Coelho; Ester C. Sabino; Flavia Cristina Sales; Franciane Mendes; Giulia Magalhães Ferreira; Ingra Moraes Claro; Jaqueline Goes de Jesus; Lucas A. Moyses Franco; Midia Ferreira; Nuno Faria; Pamela dos Santos Andrade                                                                                                       |
| EPI_ISL_1036069, EPI_ISL_1036100, EPI_ISL_1036102, EPI_ISL_1036130, EPI_ISL_1036135, EPI_ISL_1036137                                           | Labormedizinisches Zentrum Dr Risch                                                                                                                                 | University Hospital Basel, Clinical Bacteriology                                                                                                                                                                                                                                                                                                                       | Adrian Egli; Alfredo Mari; Hans Hirsch; Helena MB Seth-Smith; Julia Bielicki; Karoline Leuzinger; Lorenz Risch; Madlen Stange; Manuel Battegay; Martin Risch; Nadia Wohlwend; Tim Roloff                                                                                                                                                                                                                                                                                                                                                                  |
| EPI_ISL_1034891                                                                                                                                | Landesamt für Verbraucherschutz Sachsen Anhalt, Magdeburg                                                                                                           | Institute of Medical Microbiology and Hospital Hygiene                                                                                                                                                                                                                                                                                                                 | Aljoscha Tersteegen; Prof. Dr. Achim Kaasch                                                                                                                                                                                                                                                                                                                                                                                                                                                                                                               |
| EPI_ISL_738318, EPI_ISL_738331                                                                                                                 | Landstuhl Regional Medical Center                                                                                                                                   | United States Air Force School of Aerospace Medicine                                                                                                                                                                                                                                                                                                                   | Amanda Javorina; Anthony Fries; Clarise Starr; Cole Anderson; Elizabeth Macias; Fritz Castillo; Jennifer Meyer; Sarah Purves; William Gruner                                                                                                                                                                                                                                                                                                                                                                                                              |
| EPI_ISL_407079                                                                                                                                 | Lapland Central Hospital                                                                                                                                            | Department of Virology, University of Helsinki and Helsinki University Hospital, Helsinki, Finland                                                                                                                                                                                                                                                                     | Hannimari Kallio-Kokko; Olli Vapalahti; Suvi Kuivanen; Teemu Smura                                                                                                                                                                                                                                                                                                                                                                                                                                                                                        |
| EPI_ISL_437092                                                                                                                                 | Latvijas Infektoloijas centrs                                                                                                                                       | Latvian Biomedical Research and Study Centre                                                                                                                                                                                                                                                                                                                           | Ivars Silamielis; Jeena Storoženko; Jnis Kloviš; Kaspars Megnis; Monta Ustinova; Oksana Savicka; Tatjana Kolupajeva; Uga Dumpis; Vita Rovte; ikitā Zrelavs                                                                                                                                                                                                                                                                                                                                                                                                |
| EPI_ISL_629009, EPI_ISL_740893, EPI_ISL_767880                                                                                                 | Laverty Pathology                                                                                                                                                   | NSW Health Pathology - Institute of Clinical Pathology and Medical Research; Westmead Hospital; University of Sydney                                                                                                                                                                                                                                                   | CIDM-PH et al.                                                                                                                                                                                                                                                                                                                                                                                                                                                                                                                                            |
| EPI_ISL_1083789                                                                                                                                | Lighthouse Lab in Alderley Park                                                                                                                                     | Wellcome Sanger Institute for the COVID-19 Genomics UK (COG-UK) Consortium                                                                                                                                                                                                                                                                                             | Cordelia Langford; David K. Jackson; Dominic Kwiatkowski; Ewan Harrison; Ian Johnston; Jacquelyn Wynn; Jeffrey Barrett; John Sillitoe on behalf of the Wellcome Sanger Institute COVID-19 Surveillance Team; Mairead Hyland; Roberto Amato; Sonia Goncalves; The Lighthouse Lab in Alderley Park and Alex Alderton                                                                                                                                                                                                                                        |
| EPI_ISL_643863, EPI_ISL_986750, EPI_ISL_1033344, EPI_ISL_1082604, EPI_ISL_1101937                                                              | Lighthouse Lab in Cambridge                                                                                                                                         | Wellcome Sanger Institute for the COVID-19 Genomics UK (COG-UK) Consortium                                                                                                                                                                                                                                                                                             | Cordelia Langford; David K. Jackson; Dominic Kwiatkowski; Ewan Harrison; Ian Johnston; Jeffrey Barrett; John Sillitoe on behalf of the Wellcome Sanger Institute COVID-19 Surveillance Team; John Sillitoe on behalf of the Wellcome Sanger Institute COVID-19 Surveillance Team ( <a href="http://www.sanger.ac.uk/covid-team">http://www.sanger.ac.uk/covid-team</a> ); Rob Howes; Roberto Amato; Sonia Goncalves; The Lighthouse Lab in Cambridge and Alex Alderton                                                                                    |

|                                                                                                                                                                                                                                                                                                |                                                                                      |                                                                                                                            |                                                                                                                                                                                                                                                                                                                                                                                                                                                                                                                                                                                                                                                                                                                                                                                                                                                                                                                                                                                                                        |
|------------------------------------------------------------------------------------------------------------------------------------------------------------------------------------------------------------------------------------------------------------------------------------------------|--------------------------------------------------------------------------------------|----------------------------------------------------------------------------------------------------------------------------|------------------------------------------------------------------------------------------------------------------------------------------------------------------------------------------------------------------------------------------------------------------------------------------------------------------------------------------------------------------------------------------------------------------------------------------------------------------------------------------------------------------------------------------------------------------------------------------------------------------------------------------------------------------------------------------------------------------------------------------------------------------------------------------------------------------------------------------------------------------------------------------------------------------------------------------------------------------------------------------------------------------------|
| EPI_ISL_642314, EPI_ISL_662407, EPI_ISL_662782, EPI_ISL_782379, EPI_ISL_1057559                                                                                                                                                                                                                | Lighthouse Lab in Glasgow                                                            | Wellcome Sanger Institute for the COVID-19 Genomics UK (COG-UK) Consortium                                                 | Anna Dominiczak and Alex Alderton; Carol Clugston; Cordelia Langford; David Gray; David K. Jackson; Dominic Kwiatkowski; Ewan Harrison; Harper VanSteenhouse; Ian Johnston; Jeffrey Barrett; John Sillitoe on behalf of the Wellcome Sanger Institute COVID-19 Surveillance Team; Roberto Amato; Sonia Goncalves; Yumi Kasai                                                                                                                                                                                                                                                                                                                                                                                                                                                                                                                                                                                                                                                                                           |
| EPI_ISL_557840, EPI_ISL_1100945, EPI_ISL_1102625                                                                                                                                                                                                                                               | Lighthouse Lab in Milton Keynes                                                      | Wellcome Sanger Institute for the COVID-19 Genomics UK (COG-UK) Consortium                                                 | Cordelia Langford; David K. Jackson; Dominic Kwiatkowski; Ewan Harrison; Ian Johnston; Jeffrey Barrett; John Sillitoe on behalf of the Wellcome Sanger Institute COVID-19 Surveillance Team; Roberto Amato; Sonia Goncalves; The Lighthouse Lab in Milton Keynes and Alex Alderton                                                                                                                                                                                                                                                                                                                                                                                                                                                                                                                                                                                                                                                                                                                                     |
| EPI_ISL_581143                                                                                                                                                                                                                                                                                 | Lighthouse Lab in Milton Keynes                                                      | Wellcome Sanger Institute for the COVID-19 Genomics UK (COG-UK) consortium                                                 | Cordelia Langford; David K. Jackson; Dominic Kwiatkowski; Ewan Harrison; Ian Johnston; John Sillitoe on behalf of the Wellcome Sanger Institute COVID-19 Surveillance Team; Roberto Amato; Sonia Goncalves; The Lighthouse Lab in Milton Keynes and Alex Alderton                                                                                                                                                                                                                                                                                                                                                                                                                                                                                                                                                                                                                                                                                                                                                      |
| EPI_ISL_1008713                                                                                                                                                                                                                                                                                | Lister Laboratório de Referencia S.A. de C.V.                                        | Instituto de diagnóstico y Referencia Epidemiológicos (INDRE) Departamento de Virología                                    | Abril Rodriguez-Maldonado; Claudia Wong-Arambula; Ernesto Ramirez-Gonzalez.; Fabiola Garces-Ayala; Gisela Barrera-Badillo; Irma Lopez-Martinez; Lucia Hernandez-Rivas; Natividad Cruz-Ortiz; Tatiana Nunez-Garcia                                                                                                                                                                                                                                                                                                                                                                                                                                                                                                                                                                                                                                                                                                                                                                                                      |
| EPI_ISL_541860                                                                                                                                                                                                                                                                                 | Lithuanian University of Health Sciences Hospital, Department of Laboratory Medicine | Lithuanian University of Health Sciences, Laboratory of Molecular Cardiology                                               | Arnoldas Pautienius; Astra Vitkauskiene; Dovydas Gecys; Kamile Tamusauskaite; Laura Pareckaitė; Lukas Zemaitis; Vaiva Lesauskaite                                                                                                                                                                                                                                                                                                                                                                                                                                                                                                                                                                                                                                                                                                                                                                                                                                                                                      |
| EPI_ISL_838380                                                                                                                                                                                                                                                                                 | Liverpool Clinical Laboratories                                                      | COVID-19 Genomics UK (COG-UK) Consortium                                                                                   | A Alrezaihi; Alessandro Gerada; Alistair Darby; Angela Cowell; Anita Lucaci; Anu Chawla; Cassie Olateju; Catherine Hartley; Charlotte Nelson; Eaterina Vamos; Elaine O'Toole; Eleanor G Bentley; Ghada T Shawli; Isabel Garcia-Dorival; James Johnson; James P Stewart; Jenifer Manson; Joanne Watts; Jones Benjamin; Jordan J Clark; Julian Hiscox; L Luu; Lucille Rainbow; M Aimsaud; Margaret Hughes; Mark Whitehead; Matthew Gemmill; Miren Iturriza-Gomara; Muhannad Alruwaili; N.P Randle; Neil Swainston; PKF Gilmore; Parul Sharma; Rebekah Penrice-Randal; Richard Eccles; Richard Gregory; Sam Haldenby; Steve Paterson; Stuart D Armstrong; Trevor Ian Robinson; Ximeng Han                                                                                                                                                                                                                                                                                                                                 |
| EPI_ISL_1095327                                                                                                                                                                                                                                                                                | MD DOH Laboratories Administration                                                   | Respiratory Viruses Branch, Division of Viral Diseases, Centers for Disease Control and Prevention                         | Anna Montmayeur; Anna Uehara; Ben L. Rambo-Martin; Clinton R. Paden; Dhvani Batra; Haibin Wang; Jasmine Padilla; Jing Zhang; Justin Lee; Krista Queen; Lori Rowe; Mark Burroughs; Mili Sheth; Peter W. Cook; Rachel Marine; Sarah Nobles; Suxiang Tong; Yan Li; Ying Tao                                                                                                                                                                                                                                                                                                                                                                                                                                                                                                                                                                                                                                                                                                                                               |
| EPI_ISL_534712, EPI_ISL_648276                                                                                                                                                                                                                                                                 | MD PHL                                                                               | MD PHL                                                                                                                     | Maryland Department of Health Laboratories Administration                                                                                                                                                                                                                                                                                                                                                                                                                                                                                                                                                                                                                                                                                                                                                                                                                                                                                                                                                              |
| EPI_ISL_736930                                                                                                                                                                                                                                                                                 | MDS                                                                                  | KRISP, KZN Research Innovation and Sequencing Platform                                                                     | ChimukangaraB; Gandhari J; Khan S; Lessells R; Mdlalose K; Pillay S; Tegally H; Wilkinson E; York D; de Oliveira T                                                                                                                                                                                                                                                                                                                                                                                                                                                                                                                                                                                                                                                                                                                                                                                                                                                                                                     |
| EPI_ISL_982919                                                                                                                                                                                                                                                                                 | MEPHI Aix Marseille University (AMU)                                                 | MEPHI Aix Marseille University (AMU)                                                                                       | Anthony LEVASSEUR                                                                                                                                                                                                                                                                                                                                                                                                                                                                                                                                                                                                                                                                                                                                                                                                                                                                                                                                                                                                      |
| EPI_ISL_568979, EPI_ISL_569126, EPI_ISL_569167                                                                                                                                                                                                                                                 | MEPHI, Aix Marseille University                                                      | MEPHI, Aix Marseille University                                                                                            | Anthony LEVASSEUR                                                                                                                                                                                                                                                                                                                                                                                                                                                                                                                                                                                                                                                                                                                                                                                                                                                                                                                                                                                                      |
| EPI_ISL_751653, EPI_ISL_903660                                                                                                                                                                                                                                                                 | MN PHL Division, Minnesota Department of Health                                      | Genomics and Discovery, Respiratory Viruses Branch, Division of Viral Diseases, Centers for Disease Control and Prevention | Anna Montmayeur; Anna Uehara; Ben L. Rambo-Martin; Clinton R. Paden; Dhvani Batra; Haibin Wang; Jasmine Padilla; Jing Zhang; Justin Lee; Krista Queen; Lori Rowe; Mark Burroughs; Mili Sheth; Peter W. Cook; Rachel Marine; Sarah Nobles; Suxiang Tong; Yan Li; Ying Tao                                                                                                                                                                                                                                                                                                                                                                                                                                                                                                                                                                                                                                                                                                                                               |
| EPI_ISL_751737                                                                                                                                                                                                                                                                                 | MO State Public Health Laboratory                                                    | Genomics and Discovery, Respiratory Viruses Branch, Division of Viral Diseases, Centers for Disease Control and Prevention | Anna Montmayeur; Anna Uehara; Clinton R. Paden; Haibin Wang; Jing Zhang; Justin Lee; Krista Queen; Mili Sheth; Peter W. Cook; Rachel Marine; Suxiang Tong; Yan Li; Ying Tao                                                                                                                                                                                                                                                                                                                                                                                                                                                                                                                                                                                                                                                                                                                                                                                                                                            |
| EPI_ISL_424870                                                                                                                                                                                                                                                                                 | MO State Public Health Laboratory                                                    | Pathogen Discovery, Respiratory Viruses Branch, Division of Viral Diseases, Centers for Disease Control and Prevention     | Alison S. Laufer Halpin; Anna Uehara; Christopher A. Elkins; Clinton R. Paden; Haibin Wang; Jing Zhang; Krista Queen; Mary S. Keckler; Rachel Marine; Suxiang Tong; Yan Li; Ying Tao                                                                                                                                                                                                                                                                                                                                                                                                                                                                                                                                                                                                                                                                                                                                                                                                                                   |
| EPI_ISL_903375, EPI_ISL_903376, EPI_ISL_903377, EPI_ISL_903378, EPI_ISL_903379, EPI_ISL_903381, EPI_ISL_903382, EPI_ISL_903389                                                                                                                                                                 | MOH - Jaber Al-Ahmad Hospital (Innovation Research Laboratory)                       | MOH - Jaber Al-Ahmad Hospital (Innovation Research Laboratory)                                                             | Mohammad Alghounaim; Salman Al-Sabab                                                                                                                                                                                                                                                                                                                                                                                                                                                                                                                                                                                                                                                                                                                                                                                                                                                                                                                                                                                   |
| see above                                                                                                                                                                                                                                                                                      | MOH - Jaber Al-Ahmad Hospital (Innovation Research Laboratory)                       | MOH - Jaber Al-Ahmad Hospital (Innovation Research Laboratory)                                                             | Mohammad Alghounaim; Salman Al-Sabab                                                                                                                                                                                                                                                                                                                                                                                                                                                                                                                                                                                                                                                                                                                                                                                                                                                                                                                                                                                   |
| EPI_ISL_854406, EPI_ISL_983134, EPI_ISL_983168                                                                                                                                                                                                                                                 | MONTEFIORE MEDICAL CENTER LABORATORIES                                               | Wadsworth Center, New York State Department of Health                                                                      | Alexis Russel; Daryl M. Lamson; Erasmus Schneider; Erica Lasek-Nesselquist; John Kelly; Jonathan Plitnick; Kirsten St. George; Matthew Shudt; Melissa A Leisner; Navjot Singh                                                                                                                                                                                                                                                                                                                                                                                                                                                                                                                                                                                                                                                                                                                                                                                                                                          |
| EPI_ISL_954226, EPI_ISL_954227, EPI_ISL_954242, EPI_ISL_954247, EPI_ISL_954255, EPI_ISL_954257, EPI_ISL_954263, EPI_ISL_954270, EPI_ISL_954271, EPI_ISL_954279, EPI_ISL_954283, EPI_ISL_954284, EPI_ISL_954287, EPI_ISL_954291, EPI_ISL_954297, EPI_ISL_954298, EPI_ISL_954299, EPI_ISL_954300 | MRC/UVRI & LSHTM Uganda Research Unit                                                | Where sequence data have been generated and submitted to GISAID                                                            | Dan Lule Bugembe; Isaac Sseewanyana; Matthew Cotten; My V.T. Phan; Patrick Semanda; Pontiano Kaleebu; Susan Nabadda                                                                                                                                                                                                                                                                                                                                                                                                                                                                                                                                                                                                                                                                                                                                                                                                                                                                                                    |
| see above                                                                                                                                                                                                                                                                                      | MRC/UVRI & LSHTM Uganda Research Unit                                                | Where sequence data have been generated and submitted to GISAID                                                            | Dan Lule Bugembe; Isaac Sseewanyana; Matthew Cotten; My V.T. Phan; Patrick Semanda; Pontiano Kaleebu; Susan Nabadda                                                                                                                                                                                                                                                                                                                                                                                                                                                                                                                                                                                                                                                                                                                                                                                                                                                                                                    |
| EPI_ISL_428856                                                                                                                                                                                                                                                                                 | MRCG at LSHTM Genomics Lab                                                           | MRCG at LSHTM Genomics lab                                                                                                 | Sesay et al                                                                                                                                                                                                                                                                                                                                                                                                                                                                                                                                                                                                                                                                                                                                                                                                                                                                                                                                                                                                            |
| EPI_ISL_471159, EPI_ISL_471160, EPI_ISL_471163, EPI_ISL_561202, EPI_ISL_561259, EPI_ISL_561266, EPI_ISL_810982, EPI_ISL_811024, EPI_ISL_915192, EPI_ISL_915421                                                                                                                                 | MRCG at LSHTM Genomics lab                                                           | MRCG at LSHTM Genomics lab                                                                                                 | Abdoulie Kante; Abdul Karim sesay; Bakary Sanyang; Jarra Manneh; Mariama Kujabi; Sesay et al                                                                                                                                                                                                                                                                                                                                                                                                                                                                                                                                                                                                                                                                                                                                                                                                                                                                                                                           |
| see above                                                                                                                                                                                                                                                                                      | MRCG at LSHTM Genomics lab                                                           | MRCG at LSHTM Genomics lab                                                                                                 | Abdoulie Kante; Abdul Karim sesay; Bakary Sanyang; Jarra Manneh; Mariama Kujabi; Sesay et al                                                                                                                                                                                                                                                                                                                                                                                                                                                                                                                                                                                                                                                                                                                                                                                                                                                                                                                           |
| EPI_ISL_903745                                                                                                                                                                                                                                                                                 | MS Public Health Laboratory                                                          | Genomics and Discovery, Respiratory Viruses Branch, Division of Viral Diseases, Centers for Disease Control and Prevention | Anna Montmayeur; Anna Uehara; Ben L. Rambo-Martin; Clinton R. Paden; Dhvani Batra; Haibin Wang; Jasmine Padilla; Jing Zhang; Justin Lee; Krista Queen; Lori Rowe; Mark Burroughs; Mili Sheth; Peter W. Cook; Rachel Marine; Sarah Nobles; Suxiang Tong; Yan Li; Ying Tao                                                                                                                                                                                                                                                                                                                                                                                                                                                                                                                                                                                                                                                                                                                                               |
| EPI_ISL_648039                                                                                                                                                                                                                                                                                 | MS Public Health Laboratory                                                          | Pathogen Discovery, Respiratory Viruses Branch, Division of Viral Diseases, Centers for Disease Control and Prevention     | Anna Montmayeur; Anna Uehara; Brian Lynch; Clinton R. Paden; Haibin Wang; Jing Zhang; Krista Queen; Rachel Marine; Suxiang Tong; Yan Li; Ying Tao                                                                                                                                                                                                                                                                                                                                                                                                                                                                                                                                                                                                                                                                                                                                                                                                                                                                      |
| EPI_ISL_414476, EPI_ISL_802417                                                                                                                                                                                                                                                                 | MSHS Clinical Microbiology Laboratories                                              | MSHS Pathogen Surveillance Program                                                                                         | Adolfo Garcia-Sarstre; Adolfo Garcia-Sastre; Adriana van de Guchte; Ajay Obla; Alberto Paniz-Mondolfi; Alberto Paniz-mondolfi; Ana S. Gonzalez-Reiche; Ana Sylvia Gonzalez-Reiche; Andrew Kasarskis; Angela Amoako; Ashley S. Salimbangon; Betsaida Salom Melo; Bremy Albuquerque; Brienne Ciferri; Charles Gleason; Deena R. Altman; Denise Juczyszak; Elena Hirsch; Emilia Mia Sordillo; Emilia Sordillo; Emily Ferreri; Florian Krammer; Gintaras Deikus; Giulio Kleiner; Gopi Patel; Hala Alshammary; Harm van Bakel; Irina Oussenko; Jayeeta Dutta; Jose Polanco; Juan Soto; Judith Aberg; Katherine Beach; Kathryn Twyman; Kayla Russo; Komal Srivastava; Levy Sominsky; Lisa Miorini; Mahmoud Awawda; Marta Luksza; Matthew Hernandez; Matthew M. Hernandez; Melissa Gitman; Melissa Smith; Michael D. Nowak; Mitchell J. Sullivan; Nancy Francoeur; Rachel Chernet; Randy Albrecht; Robert Sebra; Sarah Schaefer; Shclcie Fabre; Shwetha Hara Sridhar; Viviana Simon; Wen-chun Liu; Ying-Chih Wang; Zenab Khan |
| EPI_ISL_903853                                                                                                                                                                                                                                                                                 | MT Public Health Laboratory                                                          | Genomics and Discovery, Respiratory Viruses Branch, Division of Viral Diseases, Centers for Disease Control and Prevention | Anna Montmayeur; Anna Uehara; Ben L. Rambo-Martin; Clinton R. Paden; Dhvani Batra; Haibin Wang; Jasmine Padilla; Jing Zhang; Justin Lee; Krista Queen; Lori Rowe; Mark Burroughs; Mili Sheth; Peter W. Cook; Rachel Marine; Sarah Nobles; Suxiang Tong; Yan Li; Ying Tao                                                                                                                                                                                                                                                                                                                                                                                                                                                                                                                                                                                                                                                                                                                                               |
| EPI_ISL_1094213, EPI_ISL_1094328, EPI_ISL_1094415, EPI_ISL_1094931, EPI_ISL_1094940                                                                                                                                                                                                            | MT Public Health Laboratory                                                          | Respiratory Viruses Branch, Division of Viral Diseases, Centers for Disease Control and Prevention                         | Anna Montmayeur; Anna Uehara; Ben L. Rambo-Martin; Clinton R. Paden; Dhvani Batra; Haibin Wang; Jasmine Padilla; Jing Zhang; Justin Lee; Krista Queen; Lori Rowe; Mark Burroughs; Mili Sheth; Peter W. Cook; Rachel Marine; Sarah Nobles; Suxiang Tong; Yan Li; Ying Tao                                                                                                                                                                                                                                                                                                                                                                                                                                                                                                                                                                                                                                                                                                                                               |
| EPI_ISL_832853, EPI_ISL_1048624, EPI_ISL_1048638                                                                                                                                                                                                                                               | Maine HETL                                                                           | Tewhey Lab, The Jackson Laboratory                                                                                         | Barter, M.; Dewey, H.; H. and Tewhey, R.; Iosue, F.; Lynch, R.; Matluk, N.; Munger                                                                                                                                                                                                                                                                                                                                                                                                                                                                                                                                                                                                                                                                                                                                                                                                                                                                                                                                     |
| EPI_ISL_755308, EPI_ISL_755309, EPI_ISL_755312, EPI_ISL_755332, EPI_ISL_755430, EPI_ISL_755492                                                                                                                                                                                                 | Maine Health and Environmental Testing Laboratory                                    | Tewhey Lab, The Jackson Laboratory                                                                                         | Barter, M.; Dewey, H.; H. and Tewhey, R.; Iosue, F.; Lynch, R.; Matluk, N.; Munger                                                                                                                                                                                                                                                                                                                                                                                                                                                                                                                                                                                                                                                                                                                                                                                                                                                                                                                                     |
| EPI_ISL_937414                                                                                                                                                                                                                                                                                 | Maine Health and Environmental Testing Laboratory (Maine HETL)                       | Tewhey Lab, The Jackson Laboratory                                                                                         | Barter, M.; Dewey, H.; H. and Tewhey, R.; Iosue, F.; Lynch, R.; Matluk, N.; Munger                                                                                                                                                                                                                                                                                                                                                                                                                                                                                                                                                                                                                                                                                                                                                                                                                                                                                                                                     |
| EPI_ISL_528740, EPI_ISL_528743, EPI_ISL_568875, EPI_ISL_582124                                                                                                                                                                                                                                 | Malaysia Genome Institute                                                            | Malaysia Genome Institute                                                                                                  | Azrin Ahmad; Enizza Kasim; Irni Suhayu Sapian; Mohd Faizal Abu Bakar; Mohd Noor Mat Isa; Nor Azfa Johari; Nurhezreen Md Iqbal; Shahrul Hisham Zainal Ariffin; Shamsidar Sopia; Siti Noraini Othman; Yusuf Muhammad Noor                                                                                                                                                                                                                                                                                                                                                                                                                                                                                                                                                                                                                                                                                                                                                                                                |
| EPI_ISL_481272                                                                                                                                                                                                                                                                                 | Maryland Department of Health                                                        | Maryland Department of Health                                                                                              | Keller, E.                                                                                                                                                                                                                                                                                                                                                                                                                                                                                                                                                                                                                                                                                                                                                                                                                                                                                                                                                                                                             |
| EPI_ISL_1038825                                                                                                                                                                                                                                                                                | Maryland Public Health Laboratory                                                    | Maryland Public Health Laboratory                                                                                          | Maryland Department of Health Laboratories Administration                                                                                                                                                                                                                                                                                                                                                                                                                                                                                                                                                                                                                                                                                                                                                                                                                                                                                                                                                              |

|                                                                                                                                                                                                                                                                                                                                                                                                                                                                                                                          |                                                                                                             |                                                                                                                                                                                         |                                                                                                                                                                                                                                                                                                                                                                                                                                                                                                                                                                                                    |
|--------------------------------------------------------------------------------------------------------------------------------------------------------------------------------------------------------------------------------------------------------------------------------------------------------------------------------------------------------------------------------------------------------------------------------------------------------------------------------------------------------------------------|-------------------------------------------------------------------------------------------------------------|-----------------------------------------------------------------------------------------------------------------------------------------------------------------------------------------|----------------------------------------------------------------------------------------------------------------------------------------------------------------------------------------------------------------------------------------------------------------------------------------------------------------------------------------------------------------------------------------------------------------------------------------------------------------------------------------------------------------------------------------------------------------------------------------------------|
| EPI_ISL_676999, EPI_ISL_734472                                                                                                                                                                                                                                                                                                                                                                                                                                                                                           | Masonic Medical Research Institute                                                                          | Wadsworth Center, New York State Department of Health                                                                                                                                   | Alexis Russel; Daryl M. Lamson; Erasmus Schneider; Erica Lasek-Nesselquist; John Kelly; Jonathan Plitnick; Kirsten St. George; Nathan Tucker; Navjot Singh; Ryan D. Pfeiffer; Sara Griesemer                                                                                                                                                                                                                                                                                                                                                                                                       |
| EPI_ISL_765673, EPI_ISL_765704, EPI_ISL_765707                                                                                                                                                                                                                                                                                                                                                                                                                                                                           | Massachusetts General Hospital                                                                              | Infectious Disease Program, Broad Institute of Harvard and MIT                                                                                                                          | A.E.; Adams, G.; Anahar, M.; B.L.; B.W.; Bauer, M.; Birren; Branda, J.; Carter, A.; Cerrato, F.; Chaluvadi, S.; Chapman; Cusick, C.; D.J.; DeRuff, K.; E. and Sabeti; Flowers, K.; Gallagher, G.; Gladden-Young, A.; Gnirke, A.; Harris, J.; J.E.; K.J.; LaRoque, R.; Lagerborg, K.; Lemieux; Lin; Loreth, C.; MacInnis; Neumann, A.; Normandin, E.; P.C.; Park; Pierce, V.; Reilly, S.; Rosenberg; Rudy, M.; Ryan, E.; S.B.; Shaw, B.; Siddle; Slater, D.; Smole, S.; Tomkins-Tinch, C.; Turbett, S.                                                                                              |
| EPI_ISL_692818, EPI_ISL_876069, EPI_ISL_1009795                                                                                                                                                                                                                                                                                                                                                                                                                                                                          | Massachusetts State Public Health Laboratory                                                                | Massachusetts State Public Health Laboratory                                                                                                                                            | Andrew Lang; Glen Gallagher; Sandra Smole; Timelia Fink                                                                                                                                                                                                                                                                                                                                                                                                                                                                                                                                            |
| EPI_ISL_418801                                                                                                                                                                                                                                                                                                                                                                                                                                                                                                           | Mater Pathology                                                                                             | Public Health Virology Laboratory                                                                                                                                                       | Alyssa Pyke; Amanda De Jong; Andrew Van Den Hurk; Bixing Huang; Carmel Taylor; David Warrilow; Doris Genge; Elisabeth Gamez; Glen Hewitson; Ian Maxwell Mackay; Inga Sultana; Jamie McMahon; Jean Barcelon; Judy Northill; Mitchell Finger; Natalie Simpson; Neelima Nair; Peter Burtonclay; Peter Moore; Sarah Wheatley; Sean Moody; Sonja Hall-Mendelin; Timothy Gardam; and Frederick Moore                                                                                                                                                                                                     |
| EPI_ISL_500517                                                                                                                                                                                                                                                                                                                                                                                                                                                                                                           | Mayo Clinic Laboratories                                                                                    | University of Washington Virology Lab                                                                                                                                                   | Alexander Greninger; Amin Addetia; Hong Xie; Keith R Jerome; Lasata Shrestha; Meei-Li Huang; Pavitra Roychoudhury; Truong Nguyen; Victoria M Rachleff                                                                                                                                                                                                                                                                                                                                                                                                                                              |
| EPI_ISL_456378                                                                                                                                                                                                                                                                                                                                                                                                                                                                                                           | MedLab Central Ltd                                                                                          | Institute of Environmental Science and Research (ESR)                                                                                                                                   | Anja Werno; Antje van der Linden; Arlo Upton; Chris Mansell; David Hammer; Dragana Drinkovic; Erasmus Smit; Gary McAuliffe; Hana Sofia Andersson; James Ussher; Jill Sherwood; Joep de Ligt; Josh Freeman; Julia Howard; Juliet Elvy; Lauren Jelly; Mary DeAlmeida; Matt Blakiston; Matt Storey; Matthew Rogers; Max Bloomfield; Michael Addide; Michelle Balm; Sally Roberts; Sarah Jefferies; Sharmini Muttaiyah; Susan Morpeth; Susan Taylor; Timothy Blackmore; Vani Sathyendran; Veronica Playle; Virginia Hope; Xiaoyun Ren                                                                  |
| EPI_ISL_482760, EPI_ISL_1109484, EPI_ISL_1109485, EPI_ISL_1109629, EPI_ISL_1109630                                                                                                                                                                                                                                                                                                                                                                                                                                       | Medical Ain Shams Research Institute (MASRI), Ain Shams University                                          | Medical Ain Shams Research Institute (MASRI), Ain Shams University                                                                                                                      | Ahmad Moustafa; Ashraf Omar; Aya Mohamed; Fatma Ebied; Ghada Ismael; Hagar Elshora; Hala Hafez; Hesham Elghazaly; Hoda Ezz Elarab; Iman Foda; Mahmoud Elmeitini; Manal Hamdy Elsaid; Mohamed Elhadidi; Osama Mansour; Osama Mansour.; Reham Kassab; Reham Mamdouh; Samia Abdou Girgis; Sara Elnakeep; Sara Hassan Agwa; Shaimaa Moustafa; Shimaa Moustafa                                                                                                                                                                                                                                          |
| EPI_ISL_1040938, EPI_ISL_1040988, EPI_ISL_1041004, EPI_ISL_1096199                                                                                                                                                                                                                                                                                                                                                                                                                                                       | Medical Laboratory Bruss                                                                                    | Laboratory of Recombinant Vaccines                                                                                                                                                      | Boguslaw Szewczyk; Krystyna Bienkowska-Szewczyk; Lukasz Rabalski; Maciej Grzybek; Maciej Kosinski; Pawel Pisarek                                                                                                                                                                                                                                                                                                                                                                                                                                                                                   |
| EPI_ISL_873164, EPI_ISL_873165                                                                                                                                                                                                                                                                                                                                                                                                                                                                                           | Medical Laboratory Sciences, Arab American University                                                       | Medical Laboratory Sciences, Arab American University                                                                                                                                   | Al-Jawabreh, A.; Al-Jawabreh, H.; Dumaidi, k.; Ereqat, S.; Nasereddin, A.                                                                                                                                                                                                                                                                                                                                                                                                                                                                                                                          |
| EPI_ISL_708139                                                                                                                                                                                                                                                                                                                                                                                                                                                                                                           | Medical Microbiology Unit, Department for Laboratory Medicine, Drammen Hospital, Vestre Viken Health Trust, | Norwegian Institute of Public Health, Department of Virology                                                                                                                            | Hilde Elshaug; Hilde Vollen; Kamilla Heddeland Instefjord; Karoline Bragstad; Kathrine Stene-Johansen; Marie Paulsen Madsen; Olav Hungnes; Rasmus Riis Kopperud                                                                                                                                                                                                                                                                                                                                                                                                                                    |
| EPI_ISL_591527                                                                                                                                                                                                                                                                                                                                                                                                                                                                                                           | Medicina Norte U Chile - Servicio Medico Legal                                                              | Center for Mathematical Modeling and Center for Genome Regulation. Santiago, Chile                                                                                                      | Allende ML; Ferres M.; Gaete A; Gaggero A; González M; Maass A; Palma R; Travisany D; Urra C; Valiente F; Varas M                                                                                                                                                                                                                                                                                                                                                                                                                                                                                  |
| EPI_ISL_845803                                                                                                                                                                                                                                                                                                                                                                                                                                                                                                           | Medlab Pathology                                                                                            | NSW Health Pathology - Institute of Clinical Pathology and Medical Research; Westmead Hospital; University of Sydney                                                                    | CIDM-PH et al.                                                                                                                                                                                                                                                                                                                                                                                                                                                                                                                                                                                     |
| EPI_ISL_1048371                                                                                                                                                                                                                                                                                                                                                                                                                                                                                                          | Megalab, Molecular and Cytogenetics Diagnostics                                                             | Department for Virology, Molecular Biology and Genome Research, R. G. Lugar Center for Public Health Research, National Center for Disease Control and Public Health (NCDC) of Georgia. | Adam Kotorashvili; Amiran Gamkrelidze. Submitter information; Ana Pakpauri; Ann Machablashvili; Anna Kasradze; Davit Tsaguria; Ekaterine Khmaladze; Ekaterine Zangaladze; Ekaterine Zhgenti; Giorgi Gogoladze; Giorgi Tomashvili; Gvantsa Brachveli; Gvantsa Chanturia; Irma Burjanadze; Ketevan Sidamonidze; Khatuna Zakhshvili; Lela Sabadze; Lela Urushadze; Magda Dgebuadze; Maia Alkhashvili; Mari Gavashelidze; Mariam Zakalashvili; Marine Murtskhaladze; Meri Pantsulaia; Nato Kotaria; Nino Berishvili; Paata Imnadze; Roena Sukhishvili; Tamar Jashishvili; Tata Imnadze; Tea Tvedoradze |
| EPI_ISL_460565, EPI_ISL_507420, EPI_ISL_516212, EPI_ISL_708305, EPI_ISL_824351, EPI_ISL_913621, EPI_ISL_1058914                                                                                                                                                                                                                                                                                                                                                                                                          | see above                                                                                                   | Michigan Department of Health and Human Services, Bureau of Laboratories                                                                                                                | Blankenship HM; Riner D; Soehnlén MK                                                                                                                                                                                                                                                                                                                                                                                                                                                                                                                                                               |
| EPI_ISL_426479                                                                                                                                                                                                                                                                                                                                                                                                                                                                                                           | Microbial Genomics Laboratory, Institut Pasteur Montevideo                                                  | Microbial Genomics Laboratory, Institut Pasteur Montevideo                                                                                                                              | Cecilia Salazar; Florencia Diaz-Viraqué; Gonzalo Moratorio; Gregorio Iraola; Marianoel Pereira; Pilar Moreno                                                                                                                                                                                                                                                                                                                                                                                                                                                                                       |
| EPI_ISL_426476                                                                                                                                                                                                                                                                                                                                                                                                                                                                                                           | Microbial Genomics Laboratory, Institut Pasteur Montevideo                                                  | Microbial Genomics Laboratory, Institut Pasteur Montevideo, Uruguay                                                                                                                     | Cecilia Salazar; Florencia Diaz-Viraqué; Gonzalo Moratorio; Gregorio Iraola; Marianoel Pereira; Pilar Moreno                                                                                                                                                                                                                                                                                                                                                                                                                                                                                       |
| EPI_ISL_480337, EPI_ISL_480340, EPI_ISL_480342                                                                                                                                                                                                                                                                                                                                                                                                                                                                           | Microbial Genomics Laboratory, Institut Pasteur de Montevideo                                               | Microbial Genomics Laboratory, Institut Pasteur de Montevideo                                                                                                                           | Cecilia Salazar; Gonzalo Moratorio; Gregorio Iraola; Ignacio Ferrés; Marianoel Pereira; Pilar Moreno                                                                                                                                                                                                                                                                                                                                                                                                                                                                                               |
| EPI_ISL_519920, EPI_ISL_521927, EPI_ISL_562026, EPI_ISL_563983, EPI_ISL_564129, EPI_ISL_592243, EPI_ISL_593427, EPI_ISL_640682, EPI_ISL_779630, EPI_ISL_779641, EPI_ISL_779646, EPI_ISL_812425, EPI_ISL_812427, EPI_ISL_812429, EPI_ISL_812431, EPI_ISL_854750, EPI_ISL_877571, EPI_ISL_877573, EPI_ISL_933778, EPI_ISL_979358, EPI_ISL_979360, EPI_ISL_979361, EPI_ISL_1033145, EPI_ISL_1033146, EPI_ISL_1033147, EPI_ISL_1033148, EPI_ISL_1033150, EPI_ISL_1033151, EPI_ISL_1033153, EPI_ISL_1033156                   | see above                                                                                                   | MDU-PHL                                                                                                                                                                                 | M. B.; M.L.; N.L.; Sait; Sait, M.; Schultz; Schultz M.; Schultz M. B.; Schultz M.B.; Seemann T.; Seemann, T.; Sherry; Sherry, N.                                                                                                                                                                                                                                                                                                                                                                                                                                                                   |
| EPI_ISL_427063                                                                                                                                                                                                                                                                                                                                                                                                                                                                                                           | Microbiological Diagnostic Unit Public Health Laboratory                                                    | Microbiological Diagnostic Unit Public Health Laboratory                                                                                                                                | Sait, M.; Schultz M.; Seemann T.; Sherry, N.                                                                                                                                                                                                                                                                                                                                                                                                                                                                                                                                                       |
| EPI_ISL_833358, EPI_ISL_833361                                                                                                                                                                                                                                                                                                                                                                                                                                                                                           | Microbiology Division, South Carolina Department of Health and Environmental Control (SC DHEC)              | Microbiology Division, South Carolina Department of Health and Environmental Control (SC DHEC)                                                                                          | Flores, H.; Freeman, J.                                                                                                                                                                                                                                                                                                                                                                                                                                                                                                                                                                            |
| EPI_ISL_873168                                                                                                                                                                                                                                                                                                                                                                                                                                                                                                           | Microbiology Division, South Carolina Department of Health and Environmental Control (SC DHEC)              | Microbiology Division, South Carolina Department of Health and Environmental Control (SC DHEC)                                                                                          | Flores, H.; Freeman, J.                                                                                                                                                                                                                                                                                                                                                                                                                                                                                                                                                                            |
| EPI_ISL_848191, EPI_ISL_848194                                                                                                                                                                                                                                                                                                                                                                                                                                                                                           | Microbiology Lab                                                                                            | NBCC Sequencing Facility                                                                                                                                                                | Dr. Jeff Wrana                                                                                                                                                                                                                                                                                                                                                                                                                                                                                                                                                                                     |
| EPI_ISL_1064101                                                                                                                                                                                                                                                                                                                                                                                                                                                                                                          | Microbiology and Virology Unit, Azienda Ospedale Padova, Padova, Italy                                      | Department of Molecular Medicine, Computational Medicine Group, Univeresity of Padova, Padova, Italy                                                                                    | Andrea Crisanti; Andrea Spitaleri; Claudia Del Vecchio; Daniela Maria Cirillo; Dejan Lazarevic; Elisa Franchin; Enrico Lavezzo; Fabio Simeoni; Federico Bianca; Francesca Saluzzo; Francesco Onelia; Giovanni Lorenzin; Giovanni Tono; Laura Manuto; Marco Grazioli; Stefano Toppo                                                                                                                                                                                                                                                                                                                 |
| EPI_ISL_456214, EPI_ISL_548125, EPI_ISL_548130, EPI_ISL_548132, EPI_ISL_548145, EPI_ISL_579100, EPI_ISL_622792, EPI_ISL_622831, EPI_ISL_649122, EPI_ISL_661265, EPI_ISL_682279, EPI_ISL_682280, EPI_ISL_682282, EPI_ISL_682288, EPI_ISL_682289, EPI_ISL_682290, EPI_ISL_732969, EPI_ISL_755624, EPI_ISL_755635, EPI_ISL_877216, EPI_ISL_877217, EPI_ISL_1016857, EPI_ISL_1016868, EPI_ISL_1016872, EPI_ISL_1016874, EPI_ISL_1016879, EPI_ISL_1082257, EPI_ISL_1082258, EPI_ISL_1082259, EPI_ISL_1082262, EPI_ISL_1113756 | see above                                                                                                   | Middlemore Hospital                                                                                                                                                                     | Institute of Environmental Science and Research (ESR)                                                                                                                                                                                                                                                                                                                                                                                                                                                                                                                                              |
| EPI_ISL_661292                                                                                                                                                                                                                                                                                                                                                                                                                                                                                                           | Mikrobiologen                                                                                               | The Public Health Agency of Sweden                                                                                                                                                      | Department of Microbiology; The Public Health Agency of Sweden                                                                                                                                                                                                                                                                                                                                                                                                                                                                                                                                     |
| EPI_ISL_718186, EPI_ISL_718201, EPI_ISL_718208, EPI_ISL_718209                                                                                                                                                                                                                                                                                                                                                                                                                                                           | Ministry of Health Hospitals                                                                                | Institute of Health and Community Medicine                                                                                                                                              | Chan Chia Jui; Chua Hock Hin; David Perera; Ooi Mong How; Tonni Sia Loong Loong; Wong Jyn Shan; Wong Kiing Aik                                                                                                                                                                                                                                                                                                                                                                                                                                                                                     |
| EPI_ISL_812765, EPI_ISL_812777, EPI_ISL_812907, EPI_ISL_894250, EPI_ISL_935072, EPI_ISL_939627, EPI_ISL_983417, EPI_ISL_1063980, EPI_ISL_1073695, EPI_ISL_1073784, EPI_ISL_1097189                                                                                                                                                                                                                                                                                                                                       | see above                                                                                                   | Ministry of Health Turkey                                                                                                                                                               | Ministry of Health Turkey                                                                                                                                                                                                                                                                                                                                                                                                                                                                                                                                                                          |
| EPI_ISL_708461, EPI_ISL_913700                                                                                                                                                                                                                                                                                                                                                                                                                                                                                           | Minnesota Department of Health, Public Health Laboratory                                                    | Minnesota Department of Health, Public Health Laboratory                                                                                                                                | Alexandra Lorentz; Jacob Plumb; and Xiong Wang                                                                                                                                                                                                                                                                                                                                                                                                                                                                                                                                                     |
| EPI_ISL_435137, EPI_ISL_520739                                                                                                                                                                                                                                                                                                                                                                                                                                                                                           | Mohammed Bin Rashid University of Medicine and Health Sciences                                              | Al Jalila Genomics Center                                                                                                                                                               | Abdulmajeed Alkhaja; Abiola Catherine Senok; Ahmad Abou Tayoun; Alawi Alsheikh-Ali; Divinlal Harilal; Hamda Khansaheb; Hanan Al Suwaidi; Mohammed Uddin; Norbert Nowotny; Qutayba Hamid; Rabih Halwani; Rifat Hamoudi; Rupa Murthy Varghese; Sathiskumar Ramaswamy; Tom Loney; Zulfa Omar Deesi                                                                                                                                                                                                                                                                                                    |

|                                                                                                                                                                                                                                                                                |                                                                                                                                                                                  |                                                                                                                                                                                  |                                                                                                                                                                                                                                                                                                                                                                                                                                                                                        |
|--------------------------------------------------------------------------------------------------------------------------------------------------------------------------------------------------------------------------------------------------------------------------------|----------------------------------------------------------------------------------------------------------------------------------------------------------------------------------|----------------------------------------------------------------------------------------------------------------------------------------------------------------------------------|----------------------------------------------------------------------------------------------------------------------------------------------------------------------------------------------------------------------------------------------------------------------------------------------------------------------------------------------------------------------------------------------------------------------------------------------------------------------------------------|
| EPI_ISL_904015, EPI_ISL_904016                                                                                                                                                                                                                                                 | Molecular Biology and Virology lab, Faculty of Veterinary Medicine, Jordan University of Science and Technology                                                                  | Molecular Biology and Virology lab, Faculty of Veterinary Medicine, Jordan University of Science and Technology                                                                  | Dr. Moh'D Borhan Al-Zghoul; Dr.Mahmoud Hamad Gazo; Dr.Moh'D Borhan Al-Zghoul; Dr.Mustafa Ababneh; Dr.Saied Jaradat; Ghaya Abdellatif Alwahdane; Hazaem Haddad; Hazem Haddad; Mohammad Hussien Alboom; Suhaila Ibrahim Khalil; Suhaila Ibrahim Khalil                                                                                                                                                                                                                                   |
| EPI_ISL_1063806, EPI_ISL_1063861                                                                                                                                                                                                                                               | Molecular Laboratory, Vikash Multispeciality Hospital, Bargharh                                                                                                                  | Immunogenomics lab, Institute of Life Sciences, Bhubaneswar                                                                                                                      | Ajay Parida; Amol M. Kanampalliwar; Arup Ghosh; Atimukta Jha; INSACOG Consortium; Kirtal Hansdah; Punit Prasad; Rajeeb Swain; Rupesh Dash; Safal Walia; Shifu Aggarwal; Sunil K. Raghav                                                                                                                                                                                                                                                                                                |
| EPI_ISL_681690                                                                                                                                                                                                                                                                 | Molecular Medicine Laboratory, University of Magallanes                                                                                                                          | Centro Asistencial Docente y de Investigacion, Universidad de Magallanes                                                                                                         | Diego Alvarez; Hermy Alvarez; Jacqueline Aldridge; Jorge González; Marcelo Navarrete; Marco Montes de Oca; Roberto Uribe-Paredes                                                                                                                                                                                                                                                                                                                                                       |
| EPI_ISL_460091                                                                                                                                                                                                                                                                 | Molecular Virology Unit, Fondazione IRCCS Policlinico San Matteo, Pavia                                                                                                          | Laboratory of Virology, INMI Lazzaro Spallanzani IRCCS                                                                                                                           | Antonino Di Caro; Antonio Piralla; Barbara Bartolini; Cesare E.M. Gruber; Fausto Baldanti; Maria R. Capobianchi; Martina Rueca                                                                                                                                                                                                                                                                                                                                                         |
| EPI_ISL_895789                                                                                                                                                                                                                                                                 | Molecular biology division, Institute of Clinical Biochemistry and Diagnostics, Charles University, Faculty of Medicine in Hradec Králové and University Hospital Hradec Králové | Molecular biology division, Institute of Clinical Biochemistry and Diagnostics, Charles University, Faculty of Medicine in Hradec Králové and University Hospital Hradec Králové | Helena Kovaiková; Ivana Baranová; Jitka Novotná; Kateina Hrochová; Kateina Pehliková; Petr Brož; Tereza Baková; Vladimír Palika. Cooperation project with BioVendor-R&D and bioinformatics company BIOXSYS s.r.o.                                                                                                                                                                                                                                                                      |
| EPI_ISL_614348, EPI_ISL_614355, EPI_ISL_614356, EPI_ISL_614370, EPI_ISL_614377, EPI_ISL_681832                                                                                                                                                                                 | Molecular diagnostic unit for viral haemorrhagic fevers and emerging viruses, Bouaké CHU Laboratory                                                                              | Project group Epidemiology of Highly Pathogenic Microorganisms, Robert Koch-Institute                                                                                            | Adjaratou Traoré; Bamba Fatoumata Touré; Chantal Akoua-Koffi; Coulibaly Mbegan; Diané Bamourou; Essia Belarbi; Etilé Anoch; Fabian Leenderitz; Grit Schubert; Kra Ouffoué; Monemo Pacome; Safiatou Karidioula; Soundélé Maité                                                                                                                                                                                                                                                          |
| EPI_ISL_1017479                                                                                                                                                                                                                                                                | Murphy Medical Associates                                                                                                                                                        | Grubaugh Lab - Yale School of Public Health                                                                                                                                      | Annie Watkins; Caleb Neal; Chantal Vogels; Joseph Fauver; Mallery Breban; Mary Petrone; Nathan Grubaugh; Steven Murphy; Tara Alpert                                                                                                                                                                                                                                                                                                                                                    |
| EPI_ISL_903569                                                                                                                                                                                                                                                                 | NC State Laboratory of Public Health                                                                                                                                             | Genomics and Discovery, Respiratory Viruses Branch, Division of Viral Diseases, Centers for Disease Control and Prevention                                                       | Anna Montmayeur; Anna Uehara; Ben L. Rambo-Martin; Clinton R. Paden; Dhvani Batra; Haibin Wang; Jasmine Padilla; Jing Zhang; Justin Lee; Krista Queen; Lori Rowe; Mark Burroughs; Mili Sheth; Peter W. Cook; Rachel Marine; Sarah Nobles; Suxiang Tong; Yan Li; Ying Tao                                                                                                                                                                                                               |
| EPI_ISL_1036056                                                                                                                                                                                                                                                                | NCSLPH                                                                                                                                                                           | NCSLPH                                                                                                                                                                           | Chase K; Glover W; Greene S; Miller MC                                                                                                                                                                                                                                                                                                                                                                                                                                                 |
| EPI_ISL_903814                                                                                                                                                                                                                                                                 | ND Dept. of Health Laboratory Services-Microbiology                                                                                                                              | Genomics and Discovery, Respiratory Viruses Branch, Division of Viral Diseases, Centers for Disease Control and Prevention                                                       | Anna Montmayeur; Anna Uehara; Ben L. Rambo-Martin; Clinton R. Paden; Dhvani Batra; Haibin Wang; Jasmine Padilla; Jing Zhang; Justin Lee; Krista Queen; Lori Rowe; Mark Burroughs; Mili Sheth; Peter W. Cook; Rachel Marine; Sarah Nobles; Suxiang Tong; Yan Li; Ying Tao                                                                                                                                                                                                               |
| EPI_ISL_1094911                                                                                                                                                                                                                                                                | ND Dept. of Health Laboratory Services-Microbiology                                                                                                                              | Respiratory Viruses Branch, Division of Viral Diseases, Centers for Disease Control and Prevention                                                                               | Anna Montmayeur; Anna Uehara; Ben L. Rambo-Martin; Clinton R. Paden; Dhvani Batra; Haibin Wang; Jasmine Padilla; Jing Zhang; Justin Lee; Krista Queen; Lori Rowe; Mark Burroughs; Mili Sheth; Peter W. Cook; Rachel Marine; Sarah Nobles; Suxiang Tong; Yan Li; Ying Tao                                                                                                                                                                                                               |
| EPI_ISL_751638, EPI_ISL_751732                                                                                                                                                                                                                                                 | NE Public Health Laboratory                                                                                                                                                      | Genomics and Discovery, Respiratory Viruses Branch, Division of Viral Diseases, Centers for Disease Control and Prevention                                                       | Anna Montmayeur; Anna Uehara; Clinton R. Paden; Haibin Wang; Jing Zhang; Justin Lee; Krista Queen; Mili Sheth; Peter W. Cook; Rachel Marine; Suxiang Tong; Yan Li; Ying Tao                                                                                                                                                                                                                                                                                                            |
| EPI_ISL_605899                                                                                                                                                                                                                                                                 | NGS Lab, DNA SOLUTION LTD.                                                                                                                                                       | NGS Lab, DNA SOLUTION LTD.                                                                                                                                                       | Chowdhury, M.; H.U.; Haider; Hasan; K.N.; Khaleque, A.; Khan; Khan, M.; M.F.A.; M.H.; M.I.; M.N.I.; Poloi; Rabbi; Rahman, M.; Razu; Sufian, A.                                                                                                                                                                                                                                                                                                                                         |
| EPI_ISL_751582, EPI_ISL_903681                                                                                                                                                                                                                                                 | NH Dept. of Health and Human Services Public Health Labs                                                                                                                         | Genomics and Discovery, Respiratory Viruses Branch, Division of Viral Diseases, Centers for Disease Control and Prevention                                                       | Anna Montmayeur; Anna Uehara; Ben L. Rambo-Martin; Clinton R. Paden; Dhvani Batra; Haibin Wang; Jasmine Padilla; Jing Zhang; Justin Lee; Krista Queen; Lori Rowe; Mark Burroughs; Mili Sheth; Peter W. Cook; Rachel Marine; Sarah Nobles; Suxiang Tong; Yan Li; Ying Tao                                                                                                                                                                                                               |
| EPI_ISL_912470, EPI_ISL_912490, EPI_ISL_912503, EPI_ISL_912533, EPI_ISL_912536                                                                                                                                                                                                 | NHLS Universitas Academic                                                                                                                                                        | UFS Virology                                                                                                                                                                     | D Goedhals; MM Nyaga; MT Mogotsi; P Nthiga; PA Bester; T de Oliveira                                                                                                                                                                                                                                                                                                                                                                                                                   |
| EPI_ISL_467515, EPI_ISL_602699, EPI_ISL_660223, EPI_ISL_660224, EPI_ISL_660226, EPI_ISL_660227, EPI_ISL_660623, EPI_ISL_660650, EPI_ISL_660655, EPI_ISL_678600, EPI_ISL_678601, EPI_ISL_678602, EPI_ISL_678606, EPI_ISL_678621, EPI_ISL_736946, EPI_ISL_736991, EPI_ISL_825443 | see above                                                                                                                                                                        | NHLS-IALCH                                                                                                                                                                       | Chimukangara B; ChimukangaraB; Giandhari J; Khan S; Lessells R; Mdlalose K; Pillay S; Tegally H; Wilkinson E; York D; de Oliveira T                                                                                                                                                                                                                                                                                                                                                    |
| EPI_ISL_860559, EPI_ISL_860601, EPI_ISL_860614                                                                                                                                                                                                                                 | NHLS-IALCH                                                                                                                                                                       | KRISP, KZn Research Innovation and Sequencing Platform                                                                                                                           | Giandhari J; Khan S; Lessells R; Mdlalose K; Pillay S; Tegally H; Wilkinson E; York D; de Oliveira T                                                                                                                                                                                                                                                                                                                                                                                   |
| EPI_ISL_418241, EPI_ISL_418242, EPI_ISL_420037, EPI_ISL_766864, EPI_ISL_766869                                                                                                                                                                                                 | NIC Viral Respiratory Unit - Institut Pasteur of Algeria                                                                                                                         | National Reference Center for Viruses of Respiratory Infections, Institut Pasteur, Paris                                                                                         | Angela Brisebarre; Etienne Simon-Lorière; Fawzi Derrar; Flora Donati; Marion Barbet; Maud Vanpeene; Mélanie Albert; Méline Bizard; Sylvie Behillil; Sylvie van der Werf; Vincent Enouf                                                                                                                                                                                                                                                                                                 |
| EPI_ISL_751659, EPI_ISL_751662                                                                                                                                                                                                                                                 | NJ Public Health and Environmental Laboratories                                                                                                                                  | Genomics and Discovery, Respiratory Viruses Branch, Division of Viral Diseases, Centers for Disease Control and Prevention                                                       | Anna Montmayeur; Anna Uehara; Clinton R. Paden; Haibin Wang; Jing Zhang; Justin Lee; Krista Queen; Mili Sheth; Peter W. Cook; Rachel Marine; Suxiang Tong; Yan Li; Ying Tao                                                                                                                                                                                                                                                                                                            |
| EPI_ISL_1060771, EPI_ISL_1060803                                                                                                                                                                                                                                               | NJ Rapid Response Teams                                                                                                                                                          | New Jersey Public Health Environmental Laboratories (NJ_PHEL)                                                                                                                    | Byeong Jeong; Dana Woell; Lindsey Bodnar; Shiv Verma                                                                                                                                                                                                                                                                                                                                                                                                                                   |
| EPI_ISL_960305                                                                                                                                                                                                                                                                 | NLZOH, Laboratory for Virology                                                                                                                                                   | NLZOH, Laboratory for Virology                                                                                                                                                   | Cesare Camma (IZSAM); Erik Alm (ECDC); Katarina Prosenč (Laboratory for Virology)                                                                                                                                                                                                                                                                                                                                                                                                      |
| EPI_ISL_422402                                                                                                                                                                                                                                                                 | NMIMR, Department of Virology                                                                                                                                                    | WACCBIP, University of Ghana                                                                                                                                                     | Abraham Kwabena Anang; Augustina Arjarquah; Bright Adu; Collins M. Morang'a; Dominic S. Y. Amuzu; Erasmus Kotey; Evelyn Bonney; Fred Tei-Maya; George B. Kyei; Gordon A. Awandare; Ivy Asante; Joyce M. Ngoi; Kofi Bonney; Linda Boatemaa; Miriam Eshun; Peter Quashie; Selassie Kumordjie; Vanessa Magnussen; William Ampofo                                                                                                                                                          |
| EPI_ISL_416742                                                                                                                                                                                                                                                                 | NRL for Influenza, Centrum Epidemiology and Microbiology of National Institute of Public Health, Czech Republic                                                                  | Charite Universitaetsmedizin Berlin, Institute of Virology                                                                                                                       | Akexander Nagy; Barbara Muehleemann; Christian Drosten; Dusan Trnka; Helena Jirincova; Jaromira Vecerova; Jorn Beheim-Schwarzbach; Julia Schneider; Ludmila Novakova; Talitha Veith; Terry Jones; Victor M Corman                                                                                                                                                                                                                                                                      |
| EPI_ISL_940777                                                                                                                                                                                                                                                                 | NSPI-CRN de Influenza y otros virus respiratorios                                                                                                                                | INSPI-Centro de Investigación Multidisciplinaria de la DTIDI                                                                                                                     | Alberto Orlando.; Alfredo Bruno; Andrés Carrasco-Montalvo; Doménica de Mora; Leandro Patiño; Manuel González; Maritza Olmedo; Mary Regato-Arrata; Melissa Zambrano; Orson Mestanza                                                                                                                                                                                                                                                                                                     |
| EPI_ISL_1060655                                                                                                                                                                                                                                                                | NYU Langone Health                                                                                                                                                               | Departments of Pathology and Medicine, New York University School of Medicine                                                                                                    | Adriana Heguy; Christian Marier; Dacia Dimartino; Emily Guzman; Gael Westby; Guiqing Wang; Paolo Cotzia; Paul Zappile; Peter Meyn; Sitharam Ramaswami; Yutong Zhang                                                                                                                                                                                                                                                                                                                    |
| EPI_ISL_523962                                                                                                                                                                                                                                                                 | National Agency for Public Health, Republic of Moldova                                                                                                                           | Charite Universitaetsmedizin Berlin, Institute of Virology                                                                                                                       | Barbara Muhlemann; Christian Drosten; Elizabeta Jancheska; Golubinka Bosevska; Joern Beheim-Schwarzbach; Julia Schneider; Maja Kuzmanovska; Talitha Veith; Terry Jones; Victor M Corman                                                                                                                                                                                                                                                                                                |
| EPI_ISL_626569                                                                                                                                                                                                                                                                 | National Centre for Communicable Disease (NCCD) National Influenza Center                                                                                                        | National Centre for Communicable Disease (NCCD) National Influenza Center                                                                                                        | Ankhubayar S; Bayasgalan N; Darmaa B; Erden-Ochir Ts; Naranzul Ts; Nyamkhuu D; Nymadawa P Chang-Seon Song                                                                                                                                                                                                                                                                                                                                                                              |
| EPI_ISL_435066                                                                                                                                                                                                                                                                 | National Centre for Disease control (NCDC), CSIR-Institute of Genomics and Integrative Biology (CSIR-IGIB)                                                                       | NCDC/CSIR-IGIB                                                                                                                                                                   | Aarti Tewari; Anurag Agrawal; Bharathram Uppili; Bibhash Nandi; Debasis Dash; Dharendra Kumar; Hema Gogia; Hemlata Lall; Himanshu Vashisht; Mahesh Dhar; Manju Bala; Meena Datta; Mitali Mukerji; Mohammed Faruq; Nidhi Saini; Nishu Tyagi; Partha Rakshit; Pooja Sharma; Poonam Gupta; Pramod Kumar; Prateek Singh; Preeti Madan; Priyanka Singh; Rajesh Pandey; Sandhya Kabra; Saruchi Wadhwat; Satyabrata Bag; Simitra Singh; Sujeet Singh; Uma Sharma; Varun Jaiswal; Vivekanand A |
| EPI_ISL_414378                                                                                                                                                                                                                                                                 | National Centre for Infectious Diseases                                                                                                                                          | Programme in Emerging Infectious Diseases, Duke-NUS Medical School                                                                                                               | Barnaby E Young; Danielle E Anderson; David CB Lye; Gavin JD Smith; Jayanthi Jayakumar; Louisa Sun; Martin Linster; Yan Zhuang; Yee Sin Leo; Yvonne CF Su                                                                                                                                                                                                                                                                                                                              |
| EPI_ISL_560388                                                                                                                                                                                                                                                                 | National Health Laboratory                                                                                                                                                       | Botswana Institute for Technology Research and Innovation                                                                                                                        | Dineo Emang Tshiamo. Gape Nyepetsi; Kefentse Arnold Tumedji; Madisa Mine; Maitshwarelo Ignatius Matsheka; Thongbotho Mphoyakgosi                                                                                                                                                                                                                                                                                                                                                       |
| EPI_ISL_560386                                                                                                                                                                                                                                                                 | National Health Laboratory                                                                                                                                                       | Botswana Institute for Technology Research and Innovation                                                                                                                        | Dineo Emang Tshiamo. Gape Nyepetsi; Kefentse Arnold Tumedji; Madisa Mine; Maitshwarelo Ignatius Matsheka; Thongbotho Mphoyakgosi                                                                                                                                                                                                                                                                                                                                                       |
| EPI_ISL_944156, EPI_ISL_944163                                                                                                                                                                                                                                                 | National Health Laboratory Service, South Africa                                                                                                                                 | KRISP, KZn Research Innovation and Sequencing Platform                                                                                                                           | Emmanuel SJ; Giandhari J; Khan S; Laguda-Akingba O; Lessells R; Mdlalose K; Pillay S; Tegally H; Wilkinson E; York D; de Oliveira T                                                                                                                                                                                                                                                                                                                                                    |
| EPI_ISL_1048435, EPI_ISL_1048442, EPI_ISL_1048481, EPI_ISL_1048505, EPI_ISL_1048508, EPI_ISL_1048516, EPI_ISL_1048548, EPI_ISL_1048553, EPI_ISL_1048554, EPI_ISL_1048555, EPI_ISL_1048556, EPI_ISL_1048561, EPI_ISL_1048562, EPI_ISL_1048563, EPI_ISL_1048564, EPI_ISL_1048567 | see above                                                                                                                                                                        | National Health Laboratory Service, South Africa                                                                                                                                 | Emmanuel SJ; Giandhari J; Khan S; Laguda-Akingba O; Lessells R; Mdlalose K; Pillay S; Tegally H; Wilkinson E; York D; de Oliveira T                                                                                                                                                                                                                                                                                                                                                    |

|                                                                                                                                                                                                                                                                                                                                                                                                                                                                                                                                                                                                                                                                                                                                   |                                                                                                                                         |                                                                                                                                         |                                                                                                                                                                                                                                                                                                                                                                                                                                                                                                                                                    |
|-----------------------------------------------------------------------------------------------------------------------------------------------------------------------------------------------------------------------------------------------------------------------------------------------------------------------------------------------------------------------------------------------------------------------------------------------------------------------------------------------------------------------------------------------------------------------------------------------------------------------------------------------------------------------------------------------------------------------------------|-----------------------------------------------------------------------------------------------------------------------------------------|-----------------------------------------------------------------------------------------------------------------------------------------|----------------------------------------------------------------------------------------------------------------------------------------------------------------------------------------------------------------------------------------------------------------------------------------------------------------------------------------------------------------------------------------------------------------------------------------------------------------------------------------------------------------------------------------------------|
| EPI_ISL_456601                                                                                                                                                                                                                                                                                                                                                                                                                                                                                                                                                                                                                                                                                                                    | National Health Laboratory, Timor-Leste                                                                                                 | Microbiological Diagnostic Unit Public Health Laboratory, The Peter Doherty Institute for Infection and Immunity                        | Antonia da Costa, E.; Baird, R.; Barreto, I.; Cally, L.; Canisia, D.; Dakh, F.; Dolores de Jesus da Costa, M.; Douglas, N.; Francis, J.; Freeman, K.; Jayanti Pereira Tilman, A.; Marr, I.; Sait, M.; Salles de Sousa, A.; Schultz, M.; Seemann, T.; Sherry, N.; Soares da Silva, E.; Wapling, J.; Ximenes, J.                                                                                                                                                                                                                                     |
| EPI_ISL_770470, EPI_ISL_770471, EPI_ISL_770472, EPI_ISL_770473, EPI_ISL_770474                                                                                                                                                                                                                                                                                                                                                                                                                                                                                                                                                                                                                                                    | National Health Laboratory                                                                                                              | Botswana Institute for Technology Research and Innovation                                                                               | Dineo Emang Tshiamo. Gape Nyepetsi; Kefentse Arnold Turnedi; Madisa Mine; Maitshwarelo Ignatius Matsheka; Malebogo Kebabonye; Thongbotho Mphoyakgosi                                                                                                                                                                                                                                                                                                                                                                                               |
| EPI_ISL_416429                                                                                                                                                                                                                                                                                                                                                                                                                                                                                                                                                                                                                                                                                                                    | National Influenza Center, National Institute of Hygiene and Epidemiology (NIHE)                                                        | National Influenza Center, National Institute of Hygiene and Epidemiology (NIHE)                                                        | Dang Duc Anh; Futoshi Hasebe; Hoang Vu Mai Phuong; Kouichi Morita; Le Quynh Mai; Le Thi Thanh; Meng Ling Moi; Nguyen Le Khanh Hang; Nguyen Phuong Anh; Nguyen Vu Son; Pham Hong Quynh Anh; Pham Thi Hien; Taichiro Takemura; Takeshi Nabeshima; Tran Thu Huong; Ung Thi Hong Trang; Vuong Duc Cuong                                                                                                                                                                                                                                                |
| EPI_ISL_862075, EPI_ISL_862077, EPI_ISL_862078, EPI_ISL_862080, EPI_ISL_959279, EPI_ISL_959282, EPI_ISL_959284, EPI_ISL_1014676, EPI_ISL_1014684, EPI_ISL_1014685, EPI_ISL_1014686, EPI_ISL_1014687                                                                                                                                                                                                                                                                                                                                                                                                                                                                                                                               | see above                                                                                                                               | National Influenza Center, Virology Department                                                                                          | National Influenza Center                                                                                                                                                                                                                                                                                                                                                                                                                                                                                                                          |
| EPI_ISL_410301                                                                                                                                                                                                                                                                                                                                                                                                                                                                                                                                                                                                                                                                                                                    | National Influenza Centre, National Public Health Laboratory, Kathmandu, Nepal                                                          | The University of Hong Kong                                                                                                             | Alfonso J. Rodriguez-Morales; Anup Bastola; Basu Dev Pandey; Bibek Kumar Lal; Daniel Chu; Haoguo Gu; Leo Poon; Malik Peiris; Ranjit Sah; Runa Jha                                                                                                                                                                                                                                                                                                                                                                                                  |
| EPI_ISL_402125                                                                                                                                                                                                                                                                                                                                                                                                                                                                                                                                                                                                                                                                                                                    | National Institute for Communicable Disease Control and Prevention (ICDC) Chinese Center for Disease Control and Prevention (China CDC) | National Institute for Communicable Disease Control and Prevention (ICDC) Chinese Center for Disease Control and Prevention (China CDC) | Chen; Dai; F.-H.; Hu, Y.; J.-H.; J.-J.; J.-L. and Zhu; Liu, Y.; Pei; Q.-M.; She; Song; T.-Y.; Tao; Tian; Wang; Wang, W.; Wu, F.; Xu, L.; Y.-L.; Y.-M.; Y.-Y.; Y.-Z.; Yu, B.; Z.-G.; Z.-W.; Zhang; Zhao, S.; Zheng                                                                                                                                                                                                                                                                                                                                  |
| EPI_ISL_718263                                                                                                                                                                                                                                                                                                                                                                                                                                                                                                                                                                                                                                                                                                                    | National Institute for Infectious Diseases, INMI, "L. Spallanzani" IRCCS                                                                | National Institute for Infectious Diseases, INMI, "L. Spallanzani" IRCCS                                                                | A Di Caro; B Bartolini; C.E.M Gruber; E Giombini; F Messina; M Rueca; MR Capobianchi                                                                                                                                                                                                                                                                                                                                                                                                                                                               |
| EPI_ISL_469254, EPI_ISL_469255                                                                                                                                                                                                                                                                                                                                                                                                                                                                                                                                                                                                                                                                                                    | National Institute for Viral Disease Control and Prevention, China CDC                                                                  | Institute of Viral Disease Control and Prevention, China CDC                                                                            | Chun Huang; Dayan Wang; George F. Gao; George Fu Gao; Guizhen Wu; Jun Han; Li Zhao; Lijuan Chen; Peihua NiuBaoying Huang; Roujian Lu; Shiwen Wang; Weifeng Shi; Wenbo Xu; Wenjie Tan; Wenling Wang; William J. Liu; Xiang Zhao; Lijuan Chen; Yanhai Wang; Yao Meng; Zhixiao Chen; Yuchao Wu; Yong Zhang; Yubai Bi                                                                                                                                                                                                                                  |
| EPI_ISL_591271, EPI_ISL_591272, EPI_ISL_591273, EPI_ISL_591276, EPI_ISL_591278, EPI_ISL_591280, EPI_ISL_850947, EPI_ISL_850949, EPI_ISL_850950                                                                                                                                                                                                                                                                                                                                                                                                                                                                                                                                                                                    | see above                                                                                                                               | National Institute for Viral Disease Control and Prevention, China CDC                                                                  | National Institute for Viral Disease Control and Prevention, China CDC                                                                                                                                                                                                                                                                                                                                                                                                                                                                             |
| EPI_ISL_708839, EPI_ISL_709542                                                                                                                                                                                                                                                                                                                                                                                                                                                                                                                                                                                                                                                                                                    | National Institute of Blood Diseases (NIBD), Molecular Biology Lab                                                                      | Genomics Lab NIBD                                                                                                                       | Aneeta Shahni; Arshi Naz; Gul Sufaida; Samina Naz Mukry; Sayed Ali Raza; Shariq Ahmed; Tahir Sultan Shamsi                                                                                                                                                                                                                                                                                                                                                                                                                                         |
| EPI_ISL_943548, EPI_ISL_1118207, EPI_ISL_1118210, EPI_ISL_1118212, EPI_ISL_1118215, EPI_ISL_1118216, EPI_ISL_1118933                                                                                                                                                                                                                                                                                                                                                                                                                                                                                                                                                                                                              | see above                                                                                                                               | National Institute of Health Research and Development                                                                                   | National Institute of Health Research and Development                                                                                                                                                                                                                                                                                                                                                                                                                                                                                              |
| EPI_ISL_479756                                                                                                                                                                                                                                                                                                                                                                                                                                                                                                                                                                                                                                                                                                                    | National Institute of Hygiene and Epidemiology (NIHE)                                                                                   | National Key Laboratory of Gene Technology, Institute of Biotechnology (IBT)                                                            | Agustini Sih; Arie Ardiansyah Nugraha; Fauzul Muna; Hana Aparsi Pawestri; Hartanti Dian Ikawati; Herna; Holy Arif Wibowo; Irene Lorinda Indalao; Kartika Dewi Puspa; Kindi Adam; Krisna Nur Andriana Pangesti; Natalie Laurencia Kipuw; Nelly Puspandari; Ni Ketut Susilarini; Nike Susanti; Nurika Hariastuti; Rinir Ramadhany; Subangkit; Tati Febriyanti; Triyani Soekarso; Ulyi Alfi Nikmah; Vivi Setiawaty; Yuni Rukminiaty                                                                                                                   |
| EPI_ISL_979959, EPI_ISL_979961, EPI_ISL_1116436, EPI_ISL_1116439, EPI_ISL_1116446, EPI_ISL_1116455                                                                                                                                                                                                                                                                                                                                                                                                                                                                                                                                                                                                                                | National Institute of Infectious Diseases-Prof. Dr. Matei Bals Molecular Diagnostics Laboratory                                         | National Institute of Infectious Diseases-Prof. Dr. Matei Bals Molecular Diagnostics Laboratory                                         | Andreea Tudor; Corina Casangiu; Dan Otelea; Leontina Banica; Marius Surleac; Petre Milu; Simona Paraschiv                                                                                                                                                                                                                                                                                                                                                                                                                                          |
| EPI_ISL_469299, EPI_ISL_603221, EPI_ISL_603239, EPI_ISL_603250, EPI_ISL_959309, EPI_ISL_959545, EPI_ISL_964886, EPI_ISL_1040481, EPI_ISL_1040483, EPI_ISL_1040484                                                                                                                                                                                                                                                                                                                                                                                                                                                                                                                                                                 | see above                                                                                                                               | National Institute of Laboratory Medicine and Referral Center                                                                           | Genomic Research Lab, BCSIR                                                                                                                                                                                                                                                                                                                                                                                                                                                                                                                        |
| EPI_ISL_1091436                                                                                                                                                                                                                                                                                                                                                                                                                                                                                                                                                                                                                                                                                                                   | National Institute of Public Health - National Institute of Hygiene                                                                     | 1. National Institute of Public Health - National Institute of Hygiene; 2. Eurofins Genomics Europe Sequencing GmbH                     | A. K. M. Shamsuzzaman; A. K. M. Shamsuzzaman; Abu Sayeed Mohammad Mahmud; Arifa Akram; Asish Kumar Ghosh; Barna Goswami; Bayiz Bin Monir; Eshrar Osman; Iffat Jahan; Mahmuda Yeasmin; Md. Ahasan Habib; Md. Ahasan Habib; Md. Maruf Ahmed Molla; Md. Masum Hossain Arif; Md. Murshed Hasan Sarkar; Md. Saddam Hossain; Md. Salim Khan; Mohammad Samir Uzzaman; Monira Parveen; Salek Ahmed Sajib; Shahina Akter; Sheikh Md. Selim Al Din; Tanjina Akhter Banu; Tanjina Akhter Banu; Tanjina Akhter Banu; Tasnim Nafisa; Utpal Chandra Ray          |
| EPI_ISL_856910, EPI_ISL_904126                                                                                                                                                                                                                                                                                                                                                                                                                                                                                                                                                                                                                                                                                                    | National Institute of Public Health - National Institute of Hygiene                                                                     | National Institute of Public Health - National Institute of Hygiene                                                                     | ECDC COVID-19 WGS support team; Eurofins Genomics Europe Sequencing Team; Gierczyki Rafa; Sadkowska-Todys Magorzata; Wokowicz Tomasz; Zacharczuk Katarzyna                                                                                                                                                                                                                                                                                                                                                                                         |
| EPI_ISL_434557                                                                                                                                                                                                                                                                                                                                                                                                                                                                                                                                                                                                                                                                                                                    | National Institutes of Health, University of the Philippines Manila                                                                     | Philippine Genome Center                                                                                                                | Gawor Jan; Wokowicz Tomasz; Zacharczuk Katarzyna                                                                                                                                                                                                                                                                                                                                                                                                                                                                                                   |
| EPI_ISL_852616, EPI_ISL_892367                                                                                                                                                                                                                                                                                                                                                                                                                                                                                                                                                                                                                                                                                                    | National Laboratory for Health, Environment and Food                                                                                    | National Laboratory for Health, Environment and Food                                                                                    | Alessandra C. Sanchez; Benedict A. Maralit; Bernard Demot; Carlo M. Lapid; Christina Tan; El King D. Morado; Eva Maria Cutiongco-de la Paz; Francis A. Tablizo; Haifa L.Gaza; Jan Michael C. Yap; Jarvin E. Nipales; Jo-Hannah S. Llamas; John Mark Velasco; Joshua Gregor A. Dizon; Joy Ann Petronio-Santos; Julius Aaron Mejia; Kris P. Punayan; Kristianne Anielle D. Gabriel; Maribell Dollete; Marissa M. Alejandria; Raul V. Destura; Shana F. Genavia; Shebna Rose D. Fabiloren; Shiela Mae M. Araiza; Sonia Salamat; and Cynthia P. Saloma |
| EPI_ISL_512602, EPI_ISL_512617                                                                                                                                                                                                                                                                                                                                                                                                                                                                                                                                                                                                                                                                                                    | National Laboratory for Influenza/Virology reference laboratory, Public Health Center of the Ministry of Health of Ukraine              | Respiratory Virus Unit, Microbiology Services Colindale, Public Health England                                                          | Aleksander Mahnic; Maja Rupnik; Sandra Janezic<br>Dr. Iryna Demchyshyna; PHE Covid Sequencing Team                                                                                                                                                                                                                                                                                                                                                                                                                                                 |
| EPI_ISL_647971, EPI_ISL_647977, EPI_ISL_647978, EPI_ISL_647980                                                                                                                                                                                                                                                                                                                                                                                                                                                                                                                                                                                                                                                                    | National Microbiology Reference Laboratory                                                                                              | Quadram Institute Bioscience                                                                                                            | Agnes Juru; Alexander Goredema; Ana-Victoria Gutierrez; Andrew J. Page; Andrew Tarupiwa; Barbra Murwira; Beuty Makamure; Charles Nyagupe; David Baker; Gaetan Thilliez; Gemma Kay; Gibson Mhlanga; Hlanai Gumbo; Isaac Phiri; Justin O'Grady; Leonardo de Oliveira Martins; Muchaneta Mugabe; Portia Manangazira; Robert Kingsley; Sekesai Zinyowera; Tapfumaneni Mashé; Tatenda Takawira; Thanh Le Viet                                                                                                                                           |
| EPI_ISL_1039973, EPI_ISL_1039974, EPI_ISL_1039978, EPI_ISL_1040135                                                                                                                                                                                                                                                                                                                                                                                                                                                                                                                                                                                                                                                                | National Public Health Center, COVID Laboratory                                                                                         | National Public Health Center, National Biosafety Laboratory                                                                            | Bernadett Pályi; Dániel Déri; Judit Henczkó; Norbert Solymosi; Nóra Magyar; Zoltán Kis                                                                                                                                                                                                                                                                                                                                                                                                                                                             |
| EPI_ISL_416829, EPI_ISL_416884, EPI_ISL_416907                                                                                                                                                                                                                                                                                                                                                                                                                                                                                                                                                                                                                                                                                    | National Public Health Laboratory                                                                                                       | Malaysia Genome Institute                                                                                                               | Azrin Ahmad; Enizza Kasim; Hani Mat Hussin; Irni Suhayu Sapijan; Mohd Faizal Abu Bakar; Mohd Noor Mat Isa; Noorliza Mohamad Noordin; Nor Azfa Johari; Norazimah Tajudin; Nurhezreen Md Iqbal; Rehan Shuhada Abu Bakar; Selvanesan Sengol; Shahrul Hisham Zainal Ariffin; Shamsidar Sopie; Siti Noraini Othman; W Afiza W Mohd Arifin; Yu Kie Chem; Yusuf Muhammad Noor                                                                                                                                                                             |
| EPI_ISL_845549, EPI_ISL_845550, EPI_ISL_845554, EPI_ISL_845557, EPI_ISL_845558, EPI_ISL_845560, EPI_ISL_845561, EPI_ISL_845562, EPI_ISL_845563, EPI_ISL_845564, EPI_ISL_845565                                                                                                                                                                                                                                                                                                                                                                                                                                                                                                                                                    | see above                                                                                                                               | National Public Health Laboratory, Cameroon                                                                                             | African Centre of Excellence for Genomics of Infectious Diseases (ACEGID), Redeemer's University<br>Olunjiye P.E. et al                                                                                                                                                                                                                                                                                                                                                                                                                            |
| EPI_ISL_462316, EPI_ISL_462422, EPI_ISL_493402, EPI_ISL_498573, EPI_ISL_498596, EPI_ISL_536432, EPI_ISL_536434, EPI_ISL_536445, EPI_ISL_549002, EPI_ISL_574527, EPI_ISL_596479, EPI_ISL_596497, EPI_ISL_626641, EPI_ISL_626642, EPI_ISL_626643, EPI_ISL_626644, EPI_ISL_626646, EPI_ISL_645118, EPI_ISL_645126, EPI_ISL_645127, EPI_ISL_654812, EPI_ISL_693309, EPI_ISL_693318, EPI_ISL_693320, EPI_ISL_693322, EPI_ISL_728201, EPI_ISL_768629, EPI_ISL_803969, EPI_ISL_803980, EPI_ISL_803983, EPI_ISL_833376, EPI_ISL_833387, EPI_ISL_857478, EPI_ISL_862820, EPI_ISL_891240, EPI_ISL_937519, EPI_ISL_981012, EPI_ISL_981014, EPI_ISL_995294, EPI_ISL_995295, EPI_ISL_995300, EPI_ISL_1034271, EPI_ISL_1081939, EPI_ISL_1081947 | see above                                                                                                                               | National Public Health Laboratory, National Centre for Infectious Diseases                                                              | National Public Health Laboratory, National Centre for Infectious Diseases                                                                                                                                                                                                                                                                                                                                                                                                                                                                         |
| EPI_ISL_1122419, EPI_ISL_1122420, EPI_ISL_1122421                                                                                                                                                                                                                                                                                                                                                                                                                                                                                                                                                                                                                                                                                 | National Public Health Laboratory, National Centre for Infectious Diseases                                                              | National Virology Reference Laboratory                                                                                                  | Chavatte JM; Cui L; Lin Cui; Lin RTP; Mak TM; Octavia S; Raymond Tzer Pin Lin; Sophie Octavia; Tze Minn Mak; Zhenyang Zhou; Zhou Z<br>Lin Cui; Raymond Tzer Pin Lin; Surita Taib; Tze Minn Mak; Zainun Zaini; Zhenyang Zhou                                                                                                                                                                                                                                                                                                                        |
| EPI_ISL_1073019                                                                                                                                                                                                                                                                                                                                                                                                                                                                                                                                                                                                                                                                                                                   | National Public Health Surveillance Laboratory                                                                                          | MB1554                                                                                                                                  | Ana Steponkiene; B.B. Oude Munnink; DVM PhD; Danas Bakša; Lukas Žemaitis; M.P.G. Koopmans; Svajn Muralyt                                                                                                                                                                                                                                                                                                                                                                                                                                           |



|                                                                                                                                                                                                                                                                                                                                                                                                                                                                                                                                                |                                                                          |                                                                                                                            |                                                                                                                                                                                                                                                                                                                                                                                                                                                                                                                                                                                                      |
|------------------------------------------------------------------------------------------------------------------------------------------------------------------------------------------------------------------------------------------------------------------------------------------------------------------------------------------------------------------------------------------------------------------------------------------------------------------------------------------------------------------------------------------------|--------------------------------------------------------------------------|----------------------------------------------------------------------------------------------------------------------------|------------------------------------------------------------------------------------------------------------------------------------------------------------------------------------------------------------------------------------------------------------------------------------------------------------------------------------------------------------------------------------------------------------------------------------------------------------------------------------------------------------------------------------------------------------------------------------------------------|
| EPI_ISL_480306                                                                                                                                                                                                                                                                                                                                                                                                                                                                                                                                 | National Reference Laboratory "Influenza and acute respiratory diseases" | NRL-HIV                                                                                                                    | Ivailo Alexiev; Ivan Ivanov; Ivva Philipova                                                                                                                                                                                                                                                                                                                                                                                                                                                                                                                                                          |
| EPI_ISL_833578                                                                                                                                                                                                                                                                                                                                                                                                                                                                                                                                 | National Reference Laboratory for COVID-19, Pasteur Institute of Iran    | National Reference Laboratory for COVID-19, Pasteur Institute of Iran                                                      | Ahmad Ghasemi; Farideh Niknam; Hessam Nemati; Kayhan Azadmanesh; Mahsa Tavakoli; Maryam Rostamtabar; Marzieh Sadjadi; Mohamad Sadegh Shams Nosrati; Mohammad Hassan Pouriaeyvali; Mohammad Mehdi Mortazavipour; Mostafa Salehi-Vaziri; Parastoo Yekta; Sahar Khakifrouz; Sana Eybpoosh; Sanam Azad-Manjiri; Sepideh Gerdooei; Setareh Kashaian; Tahereh Mohammadi; Tahmineh Jalali; Zabiollah Shoja; Zahra Ahmadi; Zahra Fereydouni; Zeynab Veisizadeh                                                                                                                                               |
| EPI_ISL_443187, EPI_ISL_962877, EPI_ISL_962878                                                                                                                                                                                                                                                                                                                                                                                                                                                                                                 | National Virology Reference Laboratory                                   | National Public Health Laboratory, National Centre for Infectious Diseases                                                 | Chavatte Jean-Marc; Cui Lin; Lin Cui; Lin Raymond Tzer Pin; Mak Tze Minn; Octavia Sophie; Raymond Tzer Pin Lin; Taib Surita; Tze Minn Mak; Zaini Zainun; Zhenyang Zhou                                                                                                                                                                                                                                                                                                                                                                                                                               |
| EPI_ISL_791288                                                                                                                                                                                                                                                                                                                                                                                                                                                                                                                                 | National Virus Reference Laboratory                                      | Irish Coronavirus Sequencing Consortium - Teagasc Moorepark                                                                | Alejandro Abner Garcia Leon; Calum Walsh; Fiona Crispie; John Kenny; Paddy Mallon; Paul Cotter                                                                                                                                                                                                                                                                                                                                                                                                                                                                                                       |
| EPI_ISL_732428, EPI_ISL_732472, EPI_ISL_752519, EPI_ISL_752585, EPI_ISL_752587, EPI_ISL_909871, EPI_ISL_909883, EPI_ISL_909901, EPI_ISL_1001243, EPI_ISL_1001254, EPI_ISL_1055113, EPI_ISL_1055133, EPI_ISL_1092732, EPI_ISL_1132485                                                                                                                                                                                                                                                                                                           | National Virus Reference Laboratory                                      | National Virus Reference Laboratory                                                                                        | Charlene Bennet; Cillian F De Gascun; Daniel Hare; Gabriel Gonzalez; Guerrino Macori; Jonathan Dean; Michael Carr; Seamus Fanning; Zoe Yandle                                                                                                                                                                                                                                                                                                                                                                                                                                                        |
| see above                                                                                                                                                                                                                                                                                                                                                                                                                                                                                                                                      | National health Laboratory                                               | Botswana Institute for Technology Research and Innovation                                                                  | Dineo Emang Tshiamo. Gape Nyepetsi; Kefentse Arnold Tumedi; Madisa Mine; Maitshwarelo Ignatius Matsheka; Malebogo Kebabonye; Thongbotho Mphoyakgosi                                                                                                                                                                                                                                                                                                                                                                                                                                                  |
| EPI_ISL_770475                                                                                                                                                                                                                                                                                                                                                                                                                                                                                                                                 | National health Laboratory                                               | Botswana Institute for Technology Research and Innovation                                                                  | Dineo Emang Tshiamo. Gape Nyepetsi; Kefentse Arnold Tumedi; Madisa Mine; Maitshwarelo Ignatius Matsheka; Malebogo Kebabonye; Thongbotho Mphoyakgosi                                                                                                                                                                                                                                                                                                                                                                                                                                                  |
| EPI_ISL_877436                                                                                                                                                                                                                                                                                                                                                                                                                                                                                                                                 | National laboratory of health, environment and food Celje                | Institute of Microbiology and Immunology, Faculty of Medicine, University of Ljubljana                                     | Mario Poljak; Matic Brvar; Miša Korva; Samo Zakotnik; Tatjana Avši - Županc; Tomaž Mark Zorec                                                                                                                                                                                                                                                                                                                                                                                                                                                                                                        |
| EPI_ISL_444999                                                                                                                                                                                                                                                                                                                                                                                                                                                                                                                                 | Naval Health Research Center                                             | Naval Medical Research Center Biological Defense Research Directorate                                                      | Adrian Paskey; Chris Myers; Dessiree Pena-Gomez; Ewell Hollis; Kimberly Bishop-Lilly; Kyle Long; Logan Voegtly; Melinda Balansay-Ames; Nathaniel Christy; Regina Cer; Roger Pan                                                                                                                                                                                                                                                                                                                                                                                                                      |
| EPI_ISL_1121087                                                                                                                                                                                                                                                                                                                                                                                                                                                                                                                                | Nebraska Public Health Laboratory                                        | NPHL COVID-19 Response Team                                                                                                | NPHL COVID-19 Response Team                                                                                                                                                                                                                                                                                                                                                                                                                                                                                                                                                                          |
| EPI_ISL_475179                                                                                                                                                                                                                                                                                                                                                                                                                                                                                                                                 | Nebraska Public Health Laboratory                                        | UNMC COVID-19 Response Team                                                                                                | UNMC COVID-19 Response Team                                                                                                                                                                                                                                                                                                                                                                                                                                                                                                                                                                          |
| EPI_ISL_754068, EPI_ISL_754069                                                                                                                                                                                                                                                                                                                                                                                                                                                                                                                 | Nepal Korea Friendship Municipality Hospital                             | Nepal Health Research Council                                                                                              | Meghnath Dhimal; Pradip Gyanwali                                                                                                                                                                                                                                                                                                                                                                                                                                                                                                                                                                     |
| EPI_ISL_1085957, EPI_ISL_1085958                                                                                                                                                                                                                                                                                                                                                                                                                                                                                                               | Netcare/AMPATH                                                           | KRISP, KZN Research Innovation and Sequencing Platform                                                                     | Emmanuel SJ; Giandhari J; Khan S; Lessells R; Maslo C; Mdlalose K; Pillay S; Sitharam L; Tegally H; Wilkinson E; York D; de Oliveira T                                                                                                                                                                                                                                                                                                                                                                                                                                                               |
| EPI_ISL_1136254, EPI_ISL_1136895                                                                                                                                                                                                                                                                                                                                                                                                                                                                                                               | Nevada State Public Health Laboratory                                    | Nevada State Public Health Laboratory                                                                                      | Andrew Gorzalski; Mark Pandori                                                                                                                                                                                                                                                                                                                                                                                                                                                                                                                                                                       |
| EPI_ISL_1121537                                                                                                                                                                                                                                                                                                                                                                                                                                                                                                                                | New Mexico Department of Health Scientific Laboratory                    | Center for Global Health, University of New Mexico Health Sciences Center                                                  | Anastacia Griego; Darrell Dinwiddie; Daryl Domman; Joseph Hicks; Kurt Schwalm; Michael Edwards; Twila Kunde                                                                                                                                                                                                                                                                                                                                                                                                                                                                                          |
| EPI_ISL_767073, EPI_ISL_1055031, EPI_ISL_1114698                                                                                                                                                                                                                                                                                                                                                                                                                                                                                               | New Mexico Department of Health Scientific Laboratory                    | New Mexico Department of Health Scientific Laboratory                                                                      | Anastacia Griego-Fisher; D'eldra Malone; Ellie Johnson; Jennifer Benoit                                                                                                                                                                                                                                                                                                                                                                                                                                                                                                                              |
| EPI_ISL_467652                                                                                                                                                                                                                                                                                                                                                                                                                                                                                                                                 | New Mexico Department of Health Scientific Laboratory Division           | Center for Global Health, University of New Mexico Health Sciences Center                                                  | Darrell Dinwiddie; Daryl Domman; Joseph Hicks; Kurt Schwalm; Michael Edwards; Twila Kunde                                                                                                                                                                                                                                                                                                                                                                                                                                                                                                            |
| EPI_ISL_1010702, EPI_ISL_1010712, EPI_ISL_1061037, EPI_ISL_1121979, EPI_ISL_1121983, EPI_ISL_1121985, EPI_ISL_1121987                                                                                                                                                                                                                                                                                                                                                                                                                          | New South Wales Health Pathology Royal Prince Alfred Hospital            | Microbiology RPAH                                                                                                          | Au, J.; Bull, R.; Deveson, I.; Foster, C.; Rawlinson, W.; Ruiz Silva, M.; Van Hal, S.                                                                                                                                                                                                                                                                                                                                                                                                                                                                                                                |
| see above                                                                                                                                                                                                                                                                                                                                                                                                                                                                                                                                      | New South Wales Health Pathology Royal Prince Alfred Hospital            | Microbiology RPAH                                                                                                          | Au, J.; Bull, R.; Deveson, I.; Foster, C.; Rawlinson, W.; Ruiz Silva, M.; Van Hal, S.                                                                                                                                                                                                                                                                                                                                                                                                                                                                                                                |
| EPI_ISL_632048                                                                                                                                                                                                                                                                                                                                                                                                                                                                                                                                 | New York Presbyterian-Brooklyn Methodist Hospital                        | New York City Public Health Laboratory                                                                                     | Jade Wang; et al.                                                                                                                                                                                                                                                                                                                                                                                                                                                                                                                                                                                    |
| EPI_ISL_516938                                                                                                                                                                                                                                                                                                                                                                                                                                                                                                                                 | Nicolae Testemitanu State University of Medicine and Pharmacy            | International Centre for Genetic Engineering and Biotechnology (ICGEB) and ARGO Open Lab Platform for Genome Sequencing    | Dal Monego S; Licastro D; Marcello A; Rajasekharan S; Ulinici M                                                                                                                                                                                                                                                                                                                                                                                                                                                                                                                                      |
| EPI_ISL_825714, EPI_ISL_825807, EPI_ISL_1073639, EPI_ISL_1073640                                                                                                                                                                                                                                                                                                                                                                                                                                                                               | Nigeria Centre For Disease Control                                       | National reference Laboratory, NCDC, Gaduwa, Abuja                                                                         | Anthony Ahumbe; Catherine Okoi; Celestina Obiekea; Chimaobi Chukwu; Dr Chikwe Ihekweazu; Dr Ndodo Nnaemeka; Dr Omoare Adesuyi; Esebanmen Grace; Grace Esebanmen; Naidoo Dhamari; Nwando Mba; Olusola Anuoluwapo Akanbi                                                                                                                                                                                                                                                                                                                                                                               |
| EPI_ISL_872602, EPI_ISL_872603, EPI_ISL_872604, EPI_ISL_872605, EPI_ISL_872608, EPI_ISL_872609, EPI_ISL_872610, EPI_ISL_872623, EPI_ISL_872625, EPI_ISL_872626, EPI_ISL_906285, EPI_ISL_906288, EPI_ISL_941276, EPI_ISL_941279, EPI_ISL_941280, EPI_ISL_941281, EPI_ISL_941283                                                                                                                                                                                                                                                                 | Nigeria Centre for Disease Control (NCDC)                                | African Centre of Excellence for Genomics of Infectious Diseases (ACEGID), Redeemer's University                           | Oluniyi P.E. et al                                                                                                                                                                                                                                                                                                                                                                                                                                                                                                                                                                                   |
| see above                                                                                                                                                                                                                                                                                                                                                                                                                                                                                                                                      | Nigeria Centre for Disease Control (NCDC)                                | African Centre of Excellence for Genomics of Infectious Diseases (ACEGID), Redeemer's University                           | Oluniyi P.E. et al                                                                                                                                                                                                                                                                                                                                                                                                                                                                                                                                                                                   |
| EPI_ISL_455419, EPI_ISL_455424, EPI_ISL_527875, EPI_ISL_527905, EPI_ISL_729920, EPI_ISL_729933, EPI_ISL_729935, EPI_ISL_729960, EPI_ISL_729978, EPI_ISL_729979, EPI_ISL_729982, EPI_ISL_729984, EPI_ISL_729989, EPI_ISL_729990, EPI_ISL_730017, EPI_ISL_730042                                                                                                                                                                                                                                                                                 | Nigeria Centre for Disease Control (NCDC)                                | African Centre of Excellence for Genomics of Infectious Diseases (ACEGID), Redeemer's University, Ede, Osun State, Nigeria | Ajogbasile F.V.; Folarin O.A.; Happi C.T.; Ihekweazu C.; Kayode A.; Oguzie J.; Olawoye I.; Olumade T.; Oluniyi P.E.; Oluniyi P.E. et al; Uwanibe J.                                                                                                                                                                                                                                                                                                                                                                                                                                                  |
| see above                                                                                                                                                                                                                                                                                                                                                                                                                                                                                                                                      | Nigeria Centre for Disease Control (NCDC)                                | African Centre of Excellence for Genomics of Infectious Diseases (ACEGID), Redeemer's University, Ede, Osun State, Nigeria | Ajogbasile F.V.; Folarin O.A.; Happi C.T.; Ihekweazu C.; Kayode A.; Oguzie J.; Olawoye I.; Olumade T.; Oluniyi P.E.; Oluniyi P.E. et al; Uwanibe J.                                                                                                                                                                                                                                                                                                                                                                                                                                                  |
| EPI_ISL_977557, EPI_ISL_977564                                                                                                                                                                                                                                                                                                                                                                                                                                                                                                                 | Nigeria Centre of Disease Control (NCDC)                                 | African Centre of Excellence for Genomics of Infectious Diseases (ACEGID), Redeemer's University                           | Olawoye I. B. et al                                                                                                                                                                                                                                                                                                                                                                                                                                                                                                                                                                                  |
| EPI_ISL_1093434, EPI_ISL_1093442, EPI_ISL_1093449, EPI_ISL_1093466, EPI_ISL_1093471, EPI_ISL_1093474, EPI_ISL_1093476                                                                                                                                                                                                                                                                                                                                                                                                                          | Nigerian Centre for Disease Control (NCDC)                               | African Centre of Excellence for Genomics of Infectious Diseases (ACEGID), Redeemer's University                           | I.B.; Olawoye; et al                                                                                                                                                                                                                                                                                                                                                                                                                                                                                                                                                                                 |
| see above                                                                                                                                                                                                                                                                                                                                                                                                                                                                                                                                      | Nigerian Centre for Disease Control (NCDC)                               | African Centre of Excellence for Genomics of Infectious Diseases (ACEGID), Redeemer's University                           | I.B.; Olawoye; et al                                                                                                                                                                                                                                                                                                                                                                                                                                                                                                                                                                                 |
| EPI_ISL_1035821, EPI_ISL_1035827                                                                                                                                                                                                                                                                                                                                                                                                                                                                                                               | Nigerian Centre for Disease Control (NCDC)                               | African Centre of Excellence for Genomics of Infectious Diseases (ACEGID), Redeemer's University, Ede                      | I.B.; Olawoye; et al                                                                                                                                                                                                                                                                                                                                                                                                                                                                                                                                                                                 |
| EPI_ISL_775405                                                                                                                                                                                                                                                                                                                                                                                                                                                                                                                                 | Nordland Hospital - Bodo, Laboratory Department, Molecular Biology Unit  | Norwegian Institute of Public Health, Department of Virology                                                               | Atiya R Ali; Hilde Elshaug; Hilde Vollan; Kamilla Heddeland Instefjord; Karoline Bragstad; Kathrine Stene-Johansen; Marie Paulsen Madsen; Olav Hungnes; Rasmus Riis Kopperud                                                                                                                                                                                                                                                                                                                                                                                                                         |
| EPI_ISL_534242                                                                                                                                                                                                                                                                                                                                                                                                                                                                                                                                 | Norra Alvsborgs länssjukhus                                              | The Public Health Agency of Sweden                                                                                         | Anna Risberg; Anna-Malin Linde; Karin Tegmark-Wisell; Maria Lind Karlberg; Mattias Haukland; Mia Brytting; Olov Svartstrom; Oskar Karlsson Lindsjö; Petra Edquist; Reza Advani; Sandra Broddesson                                                                                                                                                                                                                                                                                                                                                                                                    |
| EPI_ISL_812233, EPI_ISL_1035870, EPI_ISL_1054900, EPI_ISL_1054922                                                                                                                                                                                                                                                                                                                                                                                                                                                                              | North Dakota Department of Health, Public Health Laboratory              | North Dakota Department of Health, Public Health Laboratory                                                                | Lisa Wingerter                                                                                                                                                                                                                                                                                                                                                                                                                                                                                                                                                                                       |
| EPI_ISL_1016848                                                                                                                                                                                                                                                                                                                                                                                                                                                                                                                                | North Shore Hospital                                                     | Institute of Environmental Science and Research (ESR)                                                                      | Anja Werno; Antje van der Linden; Arlo Upton; Chris Mansell; David Hammer; Dragana Drinkovic; Erasmus Smit; Gary McAuliffe; Hana Sofia Andersson; Hermes Perez; James Ussher; Jill Sherwood; Jing Wang; Joep de Lig; Josh Freeman; Julia Howard; Juliet Elvy; Lauren Jelly; Mary DeAlmeida; Matt Blakiston; Matt Storey; Matthew Rogers; Max Bloomfield; Michael Addle; Michelle Balm; Muhammad Faisal; Nikki Freed; Olin Silander; Sally Roberts; Sarah Jefferies; Sharmini Mutaiyah; Susan Morpeth; Susan Taylor; Timothy Blackmore; Vani Sathyendran; Veronica Playle; Virginia Hope; Xiaoyun Ren |
| EPI_ISL_936593, EPI_ISL_936607, EPI_ISL_936755                                                                                                                                                                                                                                                                                                                                                                                                                                                                                                 | Northwestern Memorial Hospital                                           | Ozer Lab                                                                                                                   | Chad J. Achenbach; Egon A. Ozer; Judd F. Hultquist; Lacy M. Simons; Lawrence J. Jennings; Michael G. Ison; Ramon Lorenzo-Redondo                                                                                                                                                                                                                                                                                                                                                                                                                                                                     |
| EPI_ISL_708040, EPI_ISL_708141                                                                                                                                                                                                                                                                                                                                                                                                                                                                                                                 | Norwegian Institute of Public Health, Department of Virology             | Norwegian Institute of Public Health, Department of Virology                                                               | Hilde Elshaug; Hilde Vollan; Kamilla Heddeland Instefjord; Karoline Bragstad; Kathrine Stene-Johansen; Marie Paulsen Madsen; Olav Hungnes; Rasmus Riis Kopperud                                                                                                                                                                                                                                                                                                                                                                                                                                      |
| EPI_ISL_925861, EPI_ISL_925862, EPI_ISL_925864, EPI_ISL_925868, EPI_ISL_925873, EPI_ISL_925874, EPI_ISL_925881, EPI_ISL_925882, EPI_ISL_925884, EPI_ISL_925885, EPI_ISL_925890, EPI_ISL_925891, EPI_ISL_925892, EPI_ISL_925893, EPI_ISL_925894, EPI_ISL_925895, EPI_ISL_925900, EPI_ISL_925901, EPI_ISL_925902, EPI_ISL_925903, EPI_ISL_925904, EPI_ISL_925905, EPI_ISL_925906, EPI_ISL_925907, EPI_ISL_925908, EPI_ISL_925909, EPI_ISL_925910, EPI_ISL_925912, EPI_ISL_925914, EPI_ISL_960232, EPI_ISL_960264, EPI_ISL_960300, EPI_ISL_960301 | Nucleic Acid Testing, National Reference Laboratory                      | GIGA Medical Genomics                                                                                                      | Bouchra Boujemla; Corinne Fasquelle; Esperence Umumararungu; Jacob Souopgui; Keith Durkin; Léon Mutesa; Maria Artesi; Marie-Pierre Hayette;                                                                                                                                                                                                                                                                                                                                                                                                                                                          |
| see above                                                                                                                                                                                                                                                                                                                                                                                                                                                                                                                                      | Nucleic Acid Testing, National Reference Laboratory                      | GIGA Medical Genomics                                                                                                      | Bouchra Boujemla; Corinne Fasquelle; Esperence Umumararungu; Jacob Souopgui; Keith Durkin; Léon Mutesa; Maria Artesi; Marie-Pierre Hayette;                                                                                                                                                                                                                                                                                                                                                                                                                                                          |

|                                                                                                                                                                                                                                                                                                                                                                                                                                                                                                                                                                                                 |                                                                                                                                                  |                                                                                                                            |                                                                                                                                                                                                                                                                                                                                                                                                                                                                                                                                                                                                                                                    |
|-------------------------------------------------------------------------------------------------------------------------------------------------------------------------------------------------------------------------------------------------------------------------------------------------------------------------------------------------------------------------------------------------------------------------------------------------------------------------------------------------------------------------------------------------------------------------------------------------|--------------------------------------------------------------------------------------------------------------------------------------------------|----------------------------------------------------------------------------------------------------------------------------|----------------------------------------------------------------------------------------------------------------------------------------------------------------------------------------------------------------------------------------------------------------------------------------------------------------------------------------------------------------------------------------------------------------------------------------------------------------------------------------------------------------------------------------------------------------------------------------------------------------------------------------------------|
| EPI_ISL_1117401, EPI_ISL_1117433                                                                                                                                                                                                                                                                                                                                                                                                                                                                                                                                                                | Nucleo de Pesquisa em Inovacao Terapeutica - UFPE                                                                                                | LABBE, Federal University of Pernambuco                                                                                    | Nathalie Renotte; Patrick Tuyisenge; Robert Rutayisire; Sabin Nsanzimana; Swaibu Gatara; Sébastien Bontems; Vincent Bours; Yvan Butera<br>Bruno Sampaio; Heidi Lacerda Alves da Cruz; Maira Galdino da Rocha Pitta; Marco Katzenberger; Marcos da Silveira Regueira Neto; Michelly Cristiny Pereira; Reginaldo Goncalves de Lima Neto; Valdir de Queiroz Balbino; Wilson Jose da Silva Junior                                                                                                                                                                                                                                                      |
| EPI_ISL_1094253                                                                                                                                                                                                                                                                                                                                                                                                                                                                                                                                                                                 | OH Department of Health Laboratory                                                                                                               | Respiratory Viruses Branch, Division of Viral Diseases, Centers for Disease Control and Prevention                         | Anna Montmayeur; Anna Uehara; Ben L. Rambo-Martin; Clinton R. Paden; Dhvani Batra; Haibin Wang; Jasmine Padilla; Jing Zhang; Justin Lee; Krista Queen; Lori Rowe; Mark Burroughs; Mili Sheth; Peter W. Cook; Rachel Marine; Sarah Nobles; Suxiang Tong; Yan Li; Ying Tao                                                                                                                                                                                                                                                                                                                                                                           |
| EPI_ISL_525971, EPI_ISL_667226, EPI_ISL_832599, EPI_ISL_832605, EPI_ISL_832706, EPI_ISL_832722, EPI_ISL_905883, EPI_ISL_1122320                                                                                                                                                                                                                                                                                                                                                                                                                                                                 | OHSU Lab Services Molecular Microbiology Lab                                                                                                     | Oregon SARS-CoV-2 Genome Sequencing Center                                                                                 | Alec J. Hirsch; Andrew C. Adey; Benjamin N. Bimber; Brendan L. O'Connell; Brian J. O'Roak; Daniel N. Streblov; Donna Hansel; Guang Fan; Kayla Carter; Qiu; Ruth V. Nichols; Sally Grindstaff; William B. Messer; Xuan                                                                                                                                                                                                                                                                                                                                                                                                                              |
| EPI_ISL_498172                                                                                                                                                                                                                                                                                                                                                                                                                                                                                                                                                                                  | OUCRU                                                                                                                                            | OUCRU                                                                                                                      | Dinh Nguyen Huy Man; Guy Thwaites; Lam Anh Nguyen; Lam Minh Yen; Le Manh Hung; Le Nguyen Truc Nhu; Nghiem My Ngoc; Ngo Ngoc Quang Minh; Nguyen Tan Binh; Nguyen Thanh Dung; Nguyen Thanh Phong; Nguyen Thanh Truong; Nguyen Thi Han Ny; Nguyen Thi Thu Hong; Nguyen Tri Dung; Nguyen Van Vinh Chau; Tang Chi Thuong; Tran Chanh Xuan; Tran Nguyen Hoang Tu; Tran Tan Thanh; Tran Tinh Hien; Vo Thanh Lam; and Le Van Tan; for OUCRU COVID-19 research group*                                                                                                                                                                                       |
| EPI_ISL_450744                                                                                                                                                                                                                                                                                                                                                                                                                                                                                                                                                                                  | OUCRU/HTD                                                                                                                                        | OUCRU/HTD                                                                                                                  | Dinh Nguyen Huy Man; Guy Thwaites; Lam Anh Nguyen; Lam Minh Yen; Le Manh Hung; Le Nguyen Truc Nhu; Nghiem My Ngoc; Ngo Ngoc Quang Minh; Nguyen Tan Binh; Nguyen Thanh Dung; Nguyen Thanh Phong; Nguyen Thanh Truong; Nguyen Thi Han Ny; Nguyen Thi Thu Hong; Nguyen Tri Dung; Nguyen Van Vinh Chau; Tang Chi Thuong; Tran Chanh Xuan; Tran Nguyen Hoang Tu; Tran Tan Thanh; Tran Tinh Hien; Vo Thanh Lam; and Le Van Tan; for OUCRU COVID-19 research group*                                                                                                                                                                                       |
| EPI_ISL_1073990, EPI_ISL_1074000, EPI_ISL_1074006, EPI_ISL_1074009, EPI_ISL_1074021                                                                                                                                                                                                                                                                                                                                                                                                                                                                                                             | Office of Diseases Prevention and Control Region 4 Saraburi                                                                                      | COVID-19 Network Investigations (CONI) Alliance                                                                            | Angkana Huang; Anthony R. Jones; Arporn Wangwiwatsin; Bhakbhoom Panthan; Chonticha Klungtong; Duangkamon Loesbanluechai; Ekawat Pasomsab; Elizabeth Batty; Insee Semsorn; Janjira Thaipadungpanit; Jutikul Kaewmalakul; Khajohn Joonlasak; Kingkan Rakmanee; Krittikorn Kumpornsin; Namfon Kotanan; Nathamon Runnachot; Pakjira Rimdusi; Payon Pengyo; Praima Moonmuang; Sataporn Hatsadichart; Sirinapa Singthong; Siriporn Lakesukthom; Siriwan Yaeminnual; Stefan Fernandez; Suttiruk Changchawai; Thanat Chookajorn; Theerarat Kochakarn; Treewat Watthanachockchai; Wasun Chantrattita; Worvimol Lemprasert; Wudtichai Manasatienkij          |
| EPI_ISL_882650                                                                                                                                                                                                                                                                                                                                                                                                                                                                                                                                                                                  | Ohio Department of Health Laboratory                                                                                                             | Ohio Department of Health Laboratory                                                                                       | Caitlin McDonnell; Eric Brandt; Erica Leasure; Glen McGilivray; Heather Blankenship; Holmes; Jennifer; Kelsey Florek; Keoni Omura; Kirtana Ramadugu; Quanta Brown; and Tammy Bannerman                                                                                                                                                                                                                                                                                                                                                                                                                                                             |
| EPI_ISL_457704                                                                                                                                                                                                                                                                                                                                                                                                                                                                                                                                                                                  | Oman-NIC                                                                                                                                         | Oman-NIC                                                                                                                   | Abdulla Balkhair; Ahlam Al-Amri; Aisha Al-Amri; Aisha Al-Busaidi; Amina Al-Jardani; Fahad Zadjali; Fatma BaAlawi; Hamida AL Barwani; Hanan Al-kind; Intisar Al-Shukri; Khulood Al-Mammary; Mohammed Al-Tobi; Samiha Al-Kharusi; Samira Al-Maruqi; Zeyana AL-Dahmani                                                                                                                                                                                                                                                                                                                                                                                |
| EPI_ISL_525425                                                                                                                                                                                                                                                                                                                                                                                                                                                                                                                                                                                  | Oman-National Influenza Center                                                                                                                   | Biotechnology & OMICs Laboratory                                                                                           | Abdul Latif Khan; Adil Al-Wahaibi; Adil Khan; Ahmed Al-Harrasi; Ahmed Al-Rawahi; Amina Al-Jardani; Hanan Al-Kindi; Intisar Al-Shukri; Sajjad Asaf; Samiha Al-Kharusi; Samira Al-Mahruqi; Seif Al-Abri                                                                                                                                                                                                                                                                                                                                                                                                                                              |
| EPI_ISL_518830, EPI_ISL_518833, EPI_ISL_518846                                                                                                                                                                                                                                                                                                                                                                                                                                                                                                                                                  | Oman-National Influenza Center                                                                                                                   | Biotechnology & OMICs Laboratory, Natural & Medical Sciences Research Center, University of Nizwa                          | Abdul Latif Khan; Adil Al-Wahaibi; Adil Khan; Ahlam Al-Amri; Ahmed Al-Harrasi; Ahmed Al-Rawahi; Aisha Al-Amri; Aisha Al-Busaidi; Amina Al-Jardani; Hanan Al-Kindi; Intisar Al-Shukri; Sajjad Asaf; Samiha Al-Kharusi; Samira Al-Mahruqi; Seif Al-Abri; Seif Al-Abri.                                                                                                                                                                                                                                                                                                                                                                               |
| EPI_ISL_766569                                                                                                                                                                                                                                                                                                                                                                                                                                                                                                                                                                                  | Oman-National Influenza Center                                                                                                                   | Oman-National Influenza Center                                                                                             | Aisha Al-Busaidi; Amina Al-Jardani; Hamida Al-Barwani; Hanan Al-Kindi; Intisar Al-Shukri; Laila Al-Balushi; Samiha Al-Kharusi; Samira Al-Mahruqi                                                                                                                                                                                                                                                                                                                                                                                                                                                                                                   |
| EPI_ISL_854764                                                                                                                                                                                                                                                                                                                                                                                                                                                                                                                                                                                  | Ontario's COVID-19 Genomics Rapid Response Coalition                                                                                             | McMaster University                                                                                                        | Ahmed Draia; Allison McGeer; Ana Cabrera; Andrew G. McArthur; Angel Li; Emily Panousis; Hooman Derakhshani; Jalees Nasir; Kuganya Nirmalarajah; Michael Surette; Patryk Aftanas; Samira Mubareka                                                                                                                                                                                                                                                                                                                                                                                                                                                   |
| EPI_ISL_1055371                                                                                                                                                                                                                                                                                                                                                                                                                                                                                                                                                                                 | Oregon State Public Health Laboratory                                                                                                            | Oregon SARS-CoV-2 Genome Sequencing Center                                                                                 | Alec J. Hirsch; Andrew C. Adey; Benjamin N. Bimber; Brendan L. O'Connell; Brian J. O'Roak; Daniel N. Streblov; Donna Hansel; Guang Fan; John Fontana; Kayla Carter; LaDonna Grenz; Qin; Ruth V. Nichols; Sally Grindstaff; Sonia Acharya; William B. Messer; Xuan                                                                                                                                                                                                                                                                                                                                                                                  |
| EPI_ISL_1040028, EPI_ISL_1040029, EPI_ISL_1040030                                                                                                                                                                                                                                                                                                                                                                                                                                                                                                                                               | Original detection - Virology Unit, Institut Pasteur du Cambodge; Sequencing - US National Institute of Allergy and Infectious Diseases Cambodia | Virology Unit, Institut Pasteur du Cambodge                                                                                | Chau Darapeak; Chin Savuth; Erik A Karlsson; Jennifer Bohl; Jessica Manning; Kraing Sidonn; Ly Sovann; Sophana Chea; Sreyngim Lay; Veasna Duong; Yi Sengdoeum                                                                                                                                                                                                                                                                                                                                                                                                                                                                                      |
| EPI_ISL_1131428                                                                                                                                                                                                                                                                                                                                                                                                                                                                                                                                                                                 | Osaka Institute of Public Health, Morinomiya Center                                                                                              | Pathogen Genomics Center, National Institute of Infectious Diseases                                                        | Kentaro Itokawa; Makoto Kuroda; Masanori Hashino; Rina Tanaka; Tsuyoshi Sekizuka                                                                                                                                                                                                                                                                                                                                                                                                                                                                                                                                                                   |
| EPI_ISL_493351, EPI_ISL_775293                                                                                                                                                                                                                                                                                                                                                                                                                                                                                                                                                                  | Oslo University Hospital, Department of Medical Microbiology                                                                                     | Norwegian Institute of Public Health, Department of Virology                                                               | Atiya R Ali; Hilde Elshaug; Hilde Vollan; Kamilla Heddeland Instefjord; Karoline Bragstad; Kathrine Stene-Johansen; Marie Paulsen Madsen; Olav Hungnes; Rasmus Riis Kopperud                                                                                                                                                                                                                                                                                                                                                                                                                                                                       |
| EPI_ISL_549099, EPI_ISL_962904, EPI_ISL_1118323                                                                                                                                                                                                                                                                                                                                                                                                                                                                                                                                                 | Ostfold Hospital Trust - Kalnes, Centre for Laboratory Medicine, Section for gene technology and infection serology                              | Norwegian Institute of Public Health, Department of Virology                                                               | Atiya R Ali; Debec Nadia; Engebretsen Serina Beate; Garcia Llorente Ignacio; Hilde Elshaug; Hilde Synnøve Vollan; Hilde Vollan; Ignacio Garcia Llorente; Kamilla Heddeland Instefjord; Karoline Bragstad; Kathrine Stene-Johansen; Marie Paulsen Madsen; Olav Hungnes; Pedersen Benedikte Nevjen; Rasmus Riis Kopperud; Serina B Engebretsen                                                                                                                                                                                                                                                                                                       |
| EPI_ISL_679673, EPI_ISL_706038                                                                                                                                                                                                                                                                                                                                                                                                                                                                                                                                                                  | Oxford Viromics, NDM, University of Oxford; Oxford University Hospitals; Basingstoke and North Hampshire Hospital                                | COVID-19 Genomics UK (COG-UK) Consortium                                                                                   | Alex Mobbs; Amy Trebes; Anita Justice; Catrin Moore; Christophe Fraser; David Bonsall; David Buck; Emma Wise; George Macintyre; Jessica Lynch; John Todd; Mariateresa de Cesare; Matilde Mori; Monique Andersson; Nathan Moore; Nick Cortes; Robert Shaw; Stephen Kidd; Tanya Golubchik; Timothy Peto                                                                                                                                                                                                                                                                                                                                              |
| EPI_ISL_903748                                                                                                                                                                                                                                                                                                                                                                                                                                                                                                                                                                                  | PA Department of Health, Bureau of Laboratories                                                                                                  | Genomics and Discovery, Respiratory Viruses Branch, Division of Viral Diseases, Centers for Disease Control and Prevention | Anna Montmayeur; Anna Uehara; Ben L. Rambo-Martin; Clinton R. Paden; Dhvani Batra; Haibin Wang; Jasmine Padilla; Jing Zhang; Justin Lee; Krista Queen; Lori Rowe; Mark Burroughs; Mili Sheth; Peter W. Cook; Rachel Marine; Sarah Nobles; Suxiang Tong; Yan Li; Ying Tao                                                                                                                                                                                                                                                                                                                                                                           |
| EPI_ISL_949067                                                                                                                                                                                                                                                                                                                                                                                                                                                                                                                                                                                  | PHI Institute of Nephrology - Struga                                                                                                             | Research Center for Genetic Engineering and Biotechnology "Georgi D. Efremov", Macedonian Academy of Sciences and Arts     | Aleksandar J. Dimovski; Dijana Plasheska-Karanfilska; Gjorgji Bozinovski; Milena Jakimovska; Predrag Noveski                                                                                                                                                                                                                                                                                                                                                                                                                                                                                                                                       |
| EPI_ISL_968212                                                                                                                                                                                                                                                                                                                                                                                                                                                                                                                                                                                  | PHV-FSS                                                                                                                                          | PHV-FSS                                                                                                                    | Son Nguyen et al                                                                                                                                                                                                                                                                                                                                                                                                                                                                                                                                                                                                                                   |
| EPI_ISL_596500, EPI_ISL_596518, EPI_ISL_596530, EPI_ISL_596538, EPI_ISL_596547, EPI_ISL_596567                                                                                                                                                                                                                                                                                                                                                                                                                                                                                                  | Palestinian Ministry of Health                                                                                                                   | Molecular Genetics Lab                                                                                                     | Damien Richard; Dana Najjar; Francois Balloux; Hisham Darwish; Husam Sallam; Issa Shatah; Lucy van Dorp; Mahmoud Ruzayqat; Nouar Qutob; Osama Najjar; Zaidoun Sallah                                                                                                                                                                                                                                                                                                                                                                                                                                                                               |
| EPI_ISL_955905                                                                                                                                                                                                                                                                                                                                                                                                                                                                                                                                                                                  | Pamela Youde Nethersole Eastern Hospital                                                                                                         | Hong Kong Department of Health                                                                                             | Alan K.L. Tsang; Dominic N.C. Tsang; Edman T.K. Lam; Peter C.W. Yip; Rickjason C.W. Chan                                                                                                                                                                                                                                                                                                                                                                                                                                                                                                                                                           |
| EPI_ISL_708194                                                                                                                                                                                                                                                                                                                                                                                                                                                                                                                                                                                  | Pamukkale University Hospital                                                                                                                    | Pamukkale University Department of Medical Genetics                                                                        | Onur TOKGUN et al.                                                                                                                                                                                                                                                                                                                                                                                                                                                                                                                                                                                                                                 |
| EPI_ISL_1041537, EPI_ISL_1041626                                                                                                                                                                                                                                                                                                                                                                                                                                                                                                                                                                | Pandemic Response Lab - NYC                                                                                                                      | Pandemic Response Lab, R&D                                                                                                 | Cybill del Castillo; Haijing Hao; Henry Lee; Jon Laurent; Melissa Hopkins; Michael Hammerling; Pradeep Bugga; William Ward                                                                                                                                                                                                                                                                                                                                                                                                                                                                                                                         |
| EPI_ISL_654868, EPI_ISL_812922                                                                                                                                                                                                                                                                                                                                                                                                                                                                                                                                                                  | Pasteur Institute in Ho Chi Minh city                                                                                                            | Department of Microbiology and Immunology - Pasteur Institute in Ho Chi Minh city                                          | Anh Hoang Nguyen; Cao Minh Thng; Hang Thi Thu Pham; Hieu Minh Le; Hieu Trung Nguyen; Hoàng Minh; Hoàng Nh ão; Hoàng Quc Cng; Hunh Phng Tho; Hunh Th Kim Loan; Hà Bích Ngc; Lan Trong Phan; Loan Thi Kim Huynh; Long Thanh Nguyen; Lng Chn Quang; Manh Huy Dao; Nguyen Hoàng Anh; Nguyn Hoàng Quân; Nguyn Thanh Long; Nguyn Thu Ngc; Nguyn Th Ngc Tho; Nguyn Th Thanh Thng; Nguyn Trung Hiu; Nguyn V Thng; Nhung Pham Hong Vu; Phan Trng Lãn; Phm Duy Quang; Phm Th Nhung; Phm Th Thu Hng; Quang Chan Luong; Quang Duy Pham; Thng Minh Cao; Thao Thi Ngoc Nguyen; Thinh Viet Nguyen; Thuong Vu Nguyen.; Trn Th Hng Kim; V Phm Hng Nhung; ào Huy Mnh |
| EPI_ISL_456163, EPI_ISL_456194, EPI_ISL_456222, EPI_ISL_456301, EPI_ISL_582018, EPI_ISL_637088, EPI_ISL_755626                                                                                                                                                                                                                                                                                                                                                                                                                                                                                  | see above                                                                                                                                        | PathLab Bay of Plenty                                                                                                      | Institute of Environmental Science and Research (ESR)                                                                                                                                                                                                                                                                                                                                                                                                                                                                                                                                                                                              |
| EPI_ISL_420456, EPI_ISL_470851                                                                                                                                                                                                                                                                                                                                                                                                                                                                                                                                                                  | PathWest Laboratory Medicine WA                                                                                                                  | PathWest Laboratory Medicine WA                                                                                            | Avram Levy; Chisha Sikazwe; David Smith and David Speers; Jurissa Lang                                                                                                                                                                                                                                                                                                                                                                                                                                                                                                                                                                             |
| EPI_ISL_512716, EPI_ISL_512733, EPI_ISL_594167, EPI_ISL_596734, EPI_ISL_596740, EPI_ISL_596745, EPI_ISL_596777, EPI_ISL_605829, EPI_ISL_605831, EPI_ISL_605833, EPI_ISL_672629, EPI_ISL_708747, EPI_ISL_708789, EPI_ISL_708790, EPI_ISL_708791, EPI_ISL_708793, EPI_ISL_708794, EPI_ISL_708795, EPI_ISL_708796, EPI_ISL_794672, EPI_ISL_794673, EPI_ISL_794677, EPI_ISL_794683, EPI_ISL_794686, EPI_ISL_794692, EPI_ISL_794698, EPI_ISL_794700, EPI_ISL_794710, EPI_ISL_794711, EPI_ISL_794713, EPI_ISL_794715, EPI_ISL_794716, EPI_ISL_794717, EPI_ISL_794718, EPI_ISL_794726, EPI_ISL_794727, |                                                                                                                                                  |                                                                                                                            | Anja Werno; Antje van der Linden; Arlo Upton; Chris Mansell; David Hammer; Dragana Drinkovic; Erasmus Smit; Gary McAuliffe; Hana Sofia Andersson; Hermes Perez; James Ussher; Jill Sherwood; Jing Wang; Joep de Ligt; Josh Freeman; Julia Howard; Juliet Elvy; Lauren Jelly; Mary DeAlmeida; Matt Blakiston; Matt Storey; Matthew Rogers; Max Bloomfield; Michael Addidle; Michelle Balm; Muhammad Faisal; Nikki Freed; Olin Silander; Sally Roberts; Sarah Jefferies; Sharmini Mutaiyah; Susan Morpeth; Susan Taylor; Timothy Blackmore; Vani Sathyendran; Veronica Playle; Virginia Hope; Xiaoyun Ren                                            |

|                                                                                                                                                                                                                                                                                                                                                                                                                                                                                                                                                                                                                |           |                                                                                                     |                                                                                                                                                                                                 |                                                                                                                                                                                                                                                                                                                                                                                                                                                                                                                                                                                                                                                                                                               |
|----------------------------------------------------------------------------------------------------------------------------------------------------------------------------------------------------------------------------------------------------------------------------------------------------------------------------------------------------------------------------------------------------------------------------------------------------------------------------------------------------------------------------------------------------------------------------------------------------------------|-----------|-----------------------------------------------------------------------------------------------------|-------------------------------------------------------------------------------------------------------------------------------------------------------------------------------------------------|---------------------------------------------------------------------------------------------------------------------------------------------------------------------------------------------------------------------------------------------------------------------------------------------------------------------------------------------------------------------------------------------------------------------------------------------------------------------------------------------------------------------------------------------------------------------------------------------------------------------------------------------------------------------------------------------------------------|
| EPI_ISL_794729, EPI_ISL_794730, EPI_ISL_794731, EPI_ISL_794732, EPI_ISL_794733, EPI_ISL_794734, EPI_ISL_810796, EPI_ISL_810801, EPI_ISL_810804, EPI_ISL_810968, EPI_ISL_857466, EPI_ISL_885139, EPI_ISL_933790, EPI_ISL_933792, EPI_ISL_933793, EPI_ISL_933795, EPI_ISL_933798, EPI_ISL_933802, EPI_ISL_1017678, EPI_ISL_1069391, EPI_ISL_1069392, EPI_ISL_1069393                                                                                                                                                                                                                                             | see above | PathWest Laboratory Medicine WA                                                                     | PathWest Laboratory Medicine WA Microbial Surveillance Unit                                                                                                                                     | PathWest Laboratory Medicine WA Microbial Surveillance Unit                                                                                                                                                                                                                                                                                                                                                                                                                                                                                                                                                                                                                                                   |
| EPI_ISL_667739, EPI_ISL_684398, EPI_ISL_685722, EPI_ISL_688725, EPI_ISL_690867, EPI_ISL_691204, EPI_ISL_768658, EPI_ISL_892379, EPI_ISL_892936, EPI_ISL_893300, EPI_ISL_894489, EPI_ISL_894525, EPI_ISL_894561, EPI_ISL_895408, EPI_ISL_897023, EPI_ISL_898072, EPI_ISL_901512, EPI_ISL_901575, EPI_ISL_901608, EPI_ISL_902583, EPI_ISL_1123485, EPI_ISL_1124988, EPI_ISL_1127607, EPI_ISL_1127939, EPI_ISL_1128360, EPI_ISL_1129018, EPI_ISL_1131692                                                                                                                                                          | see above | Pathogen Genomics Center, National Institute of Infectious Diseases                                 | Pathogen Genomics Center, National Institute of Infectious Diseases                                                                                                                             | Kentaro Itokawa; Makoto Kuroda; Masanori Hashino; Rina Tanaka; Tsuyoshi Sekizuka                                                                                                                                                                                                                                                                                                                                                                                                                                                                                                                                                                                                                              |
| EPI_ISL_437754, EPI_ISL_513006, EPI_ISL_513062, EPI_ISL_513170, EPI_ISL_677959, EPI_ISL_678037, EPI_ISL_678043, EPI_ISL_678216, EPI_ISL_678221, EPI_ISL_678223, EPI_ISL_751236, EPI_ISL_751501                                                                                                                                                                                                                                                                                                                                                                                                                 | see above | Pathogen Genomics Lab King Abdullah University of Science and Technology(KAUST)                     | Pathogen Genomics Lab King Abdullah University of Science and Technology(KAUST)                                                                                                                 | Abbas Al Mutair; Abdulaziz Alahmadi; Afrah Alsomali; Ahmad Bakur Mahmoud; Amanda Ooi; Amit Kumar Subudhi; Anwar Hashem; Arnab Pain; Asim Khogeer; Awad Al-Omari; Fadwa Alofi; Fathia Ben Rached; Fathia Ben-Rached; Jumana Taha; Kahled Alghithami; Khaled Alghithami; Luke Esau; Naif Almontashiri; Nashwa Al-khotani; Olga Douvropoulou; Raaeece Naem; Rahul P Salunke; Rahul Salunke; Raushan Nugmanova; Samer Salih; Sara Marrej; Sharif Hala                                                                                                                                                                                                                                                             |
| EPI_ISL_596329                                                                                                                                                                                                                                                                                                                                                                                                                                                                                                                                                                                                 |           | Pathogenic Microorganisms Variability Laboratory                                                    | WHO National Influenza Centre Russian Federation                                                                                                                                                | Alexander Gintsburg; Alexey Shchetinin; Andrey Komissarov; Andrey Pochtovny; Anna Ignatieva; Anna Ivanova; Artem Fadeev; Artem Tkachuk; Daria Danilenko; Dmitry Bazhenov; Dmitry Lioznov; Ekaterina Milashenko; Elena Burtseva; Elena Shidlovskaya; Elizaveta Divisenko; Evgeniya Mukasheva; Evgeny Usachev; Kirill Krasnoslobotsev; Kseniya Komissarova; Ludmila Kolobukhina; Maria Nikiforova; Nadezhda Kuznetsova; Olga Burgasova; Svetlana Smetanina; Svetlana Trushakova; Valeria Bacalin; Vladimir Gushchin                                                                                                                                                                                             |
| EPI_ISL_812521                                                                                                                                                                                                                                                                                                                                                                                                                                                                                                                                                                                                 |           | Pathology North - Royal North Shore Hospital - NSW Health Pathology                                 | NSW Health Pathology - Institute of Clinical Pathology and Medical Research; Westmead Hospital; University of Sydney                                                                            | CIDM-PH et al.                                                                                                                                                                                                                                                                                                                                                                                                                                                                                                                                                                                                                                                                                                |
| EPI_ISL_407894, EPI_ISL_407896, EPI_ISL_410717, EPI_ISL_417031                                                                                                                                                                                                                                                                                                                                                                                                                                                                                                                                                 |           | Pathology Queensland                                                                                | Public Health Virology Laboratory                                                                                                                                                               | Alyssa Pyke; Amanda De Jong; Andrew Van Den Hurk; Ben Huang; Bixing Huang; Carmel Taylor; David Warrilow; Doris Genge; Elisabeth Gamez; Glen Hewitson; Ian Maxwell Mackay; Inga Sultana; Jamie McMahon; Jean Barcelon; Judy Northill; Mitchell Finger; Natalie Simpson; Neelima Nair; Peter Burtonclay; Peter Moore; Sarah Wheatley; Sean Moody; Sonja Hall-Mendelin; Timothy Gardam; and Frederick Moore; and Frederick Moore.                                                                                                                                                                                                                                                                               |
| EPI_ISL_455029, EPI_ISL_545033, EPI_ISL_591501                                                                                                                                                                                                                                                                                                                                                                                                                                                                                                                                                                 |           | Pathology West - NSW Health Pathology                                                               | NSW Health Pathology - Institute of Clinical Pathology and Medical Research; Westmead Hospital; University of Sydney                                                                            | CIDM-PH et al.                                                                                                                                                                                                                                                                                                                                                                                                                                                                                                                                                                                                                                                                                                |
| EPI_ISL_1081794                                                                                                                                                                                                                                                                                                                                                                                                                                                                                                                                                                                                |           | Philippine Red Cross                                                                                | Philippine Genome Center                                                                                                                                                                        | Alethea R. de Guzman; Anna Ong-Lim; Arianne A. Zamora; Asia Louisa U. Chong; Benedict A. Maralit; Candice Francheska B. Tambaoan; Carlo M. Lapid; Celia Carlos; Cynthia P. Saloma; Devon Ray Pacial; Edsel Maurice Salvaña; El King D. Morado; Eva Maria Cutiongo-de la Paz; Francis A. Tablizo; Irish Coleen A. Asin; Jaime C. Montoya; Jan Michael C. Yap; Jo-Hannah S. Llames; John Q. Wong; Joshua Gregor A. Dizon; Juan Antonio R. Magalang; Karol Sophia Agape R. Padilla; Kenneth M. Kim; Kris P. Punayan; Marc Edsel C. Ayes; Marc Jerrone R. Castro; Maria Sofia L. Yangzon; Marissa Alejandria; Razel Nikka M. Hao; Rianna Patricia S. Cruz; Sheila Mae M. Araiza; and Maria Rosario Singh-Vergeire |
| EPI_ISL_1081810                                                                                                                                                                                                                                                                                                                                                                                                                                                                                                                                                                                                |           | Philippine Red Cross - Port Area                                                                    | Philippine Genome Center                                                                                                                                                                        | Alethea R. de Guzman; Anna Ong-Lim; Arianne A. Zamora; Asia Louisa U. Chong; Benedict A. Maralit; Candice Francheska B. Tambaoan; Carlo M. Lapid; Celia Carlos; Cynthia P. Saloma; Devon Ray Pacial; Edsel Maurice Salvaña; El King D. Morado; Eva Maria Cutiongo-de la Paz; Francis A. Tablizo; Irish Coleen A. Asin; Jaime C. Montoya; Jan Michael C. Yap; Jo-Hannah S. Llames; John Q. Wong; Joshua Gregor A. Dizon; Juan Antonio R. Magalang; Karol Sophia Agape R. Padilla; Kenneth M. Kim; Kris P. Punayan; Marc Edsel C. Ayes; Marc Jerrone R. Castro; Maria Sofia L. Yangzon; Marissa Alejandria; Razel Nikka M. Hao; Rianna Patricia S. Cruz; Sheila Mae M. Araiza; and Maria Rosario Singh-Vergeire |
| EPI_ISL_792395                                                                                                                                                                                                                                                                                                                                                                                                                                                                                                                                                                                                 |           | Plataforma de Servicios Biotecnológicos: UTTIPP/PSB , Universidad Nacional de Quilmes.              | Área de Secuenciación del Laboratorio de Virología del Hospital de Niños Dr. Ricardo Gutierrez on behalf of 'Proyecto Argentino Interinstitucional de genómica de SARS-CoV-2' (PAIS Consortium) | A; Cardama; Castello; Farina; G; Goya; Goñi; H; LE; Lusso; MI; MS; Nabaes Jodar; Natale; S; Valinotto; Viegas, M.                                                                                                                                                                                                                                                                                                                                                                                                                                                                                                                                                                                             |
| EPI_ISL_960115                                                                                                                                                                                                                                                                                                                                                                                                                                                                                                                                                                                                 |           | Plettenberg Bay Clinic wc PLC                                                                       | National Health Laboratory Service/UCT                                                                                                                                                          | Arash Iranzadeh; Bruna Galvao; Carolyn Williamson; Deelan Doolabh; Diana Hardie; Innocent Mudau; Kruger Marais; Lynn Tyers; Marvin Hsiao; Stephen Korsman                                                                                                                                                                                                                                                                                                                                                                                                                                                                                                                                                     |
| EPI_ISL_539851                                                                                                                                                                                                                                                                                                                                                                                                                                                                                                                                                                                                 |           | Pok Oi Hospital                                                                                     | Hong Kong Department of Health                                                                                                                                                                  | Alan K.L. Tsang; Dominic N.C. Tsang; Edman T.K. Lam; Peter C.W. Yip; Rickjason C.W. Chan                                                                                                                                                                                                                                                                                                                                                                                                                                                                                                                                                                                                                      |
| EPI_ISL_712085, EPI_ISL_712090                                                                                                                                                                                                                                                                                                                                                                                                                                                                                                                                                                                 |           | Port Elizabeth Provincial Hospital, National Health Laboratory Services, Eastern Cape, South Africa | National Institute for Communicable Diseases of the National Health Laboratory Service                                                                                                          | Allam M; Bhiman JN; Ismail A; Mahlangu B; Mohale T; Ntuli N                                                                                                                                                                                                                                                                                                                                                                                                                                                                                                                                                                                                                                                   |
| EPI_ISL_513526                                                                                                                                                                                                                                                                                                                                                                                                                                                                                                                                                                                                 |           | Programa de Oncovirologia, Instituto Nacional de Câncer                                             | Programa de Oncovirologia, Instituto Nacional de Câncer                                                                                                                                         | Andrea C. de Melo; Brunna M. Alves; Claudia Cicala; James Arthos; João P.B. Viola; Juliana D. Siqueira; Livia R. Goes; Marcelo A. Soares                                                                                                                                                                                                                                                                                                                                                                                                                                                                                                                                                                      |
| EPI_ISL_1092076, EPI_ISL_1092266                                                                                                                                                                                                                                                                                                                                                                                                                                                                                                                                                                               |           | Protzer Lab                                                                                         | Protzer Lab, Laboratory for Functional Genome Analysis, Dept. Genomics, Gene Center of the LMU Munich                                                                                           | Alexander Graf; Dieter Hoffmann; Elisabeth Esser; Eva C.Schulte; Helmut Blum; Stefan Krebs; Till Bunse; Ulrike Protzer                                                                                                                                                                                                                                                                                                                                                                                                                                                                                                                                                                                        |
| EPI_ISL_887202                                                                                                                                                                                                                                                                                                                                                                                                                                                                                                                                                                                                 |           | Protzer Lab                                                                                         | Protzer Lab, Gagneur Lab, Robert Koch Institut                                                                                                                                                  | Aleksandar Radonic; Alexander Karollus; Andrea Theumer; Dieter Hoffmann; Eva Schulte; Julien Gagneur; Max von Kleist; Oliver Drechsel; Stephan Fuchs; Ulrike Protzer                                                                                                                                                                                                                                                                                                                                                                                                                                                                                                                                          |
| EPI_ISL_1017337                                                                                                                                                                                                                                                                                                                                                                                                                                                                                                                                                                                                |           | Providence Oregon Regional Laboratories                                                             | Providence St. Joseph Health Molecular Genomics Laboratory                                                                                                                                      | Alexa K Dowdell; Brian D Piening; Carlo B Bifulco; Fred L Robinson; Mary Campbell                                                                                                                                                                                                                                                                                                                                                                                                                                                                                                                                                                                                                             |
| EPI_ISL_1017135                                                                                                                                                                                                                                                                                                                                                                                                                                                                                                                                                                                                |           | Providence St. Joseph Health Orange - Chapman                                                       | Providence St. Joseph Health Molecular Genomics Laboratory                                                                                                                                      | Alexa K Dowdell; Brian D Piening; Carlo B Bifulco; Fred L Robinson; Mary Campbell                                                                                                                                                                                                                                                                                                                                                                                                                                                                                                                                                                                                                             |
| EPI_ISL_1112298, EPI_ISL_1112301, EPI_ISL_1112320, EPI_ISL_1112323, EPI_ISL_1112334, EPI_ISL_1112336, EPI_ISL_1112753                                                                                                                                                                                                                                                                                                                                                                                                                                                                                          | see above | Public Health Center of Ukraine                                                                     | Charite Universitätsmedizin Berlin, Institute of Virology                                                                                                                                       | Barbara Mühlemann; Christian Drosten; Ihor Kuzin; Iryna Demchyshyna; Julia Schneider; Jörn Beheim-Schwarzbach; Liudmyla Chernenko; Roman Rodyna; Talitha Veith; Terry Jones; Victor M Corman                                                                                                                                                                                                                                                                                                                                                                                                                                                                                                                  |
| EPI_ISL_469232                                                                                                                                                                                                                                                                                                                                                                                                                                                                                                                                                                                                 |           | Public Health Laboratory                                                                            | National Microbiology Laboratory                                                                                                                                                                | Adel Malek; Anna Majer; Elsie Grudeski; Gary Van Domselaar; George Zahariadis; Grace Seo; Jennifer Tanner; Kristyn Burak; Laura Gilbert; Matthew Gilmour; Morag Graham; Natalie Knox; Nathalie Bastien; Philip Mabon; Rhiannon Huzarewicz; Robert Needie; Russell Mandes; Shari Tyson; Timothy Booth; Yan Li; Yang Yu                                                                                                                                                                                                                                                                                                                                                                                         |
| EPI_ISL_576139, EPI_ISL_576140, EPI_ISL_593641, EPI_ISL_593642, EPI_ISL_639750, EPI_ISL_693269, EPI_ISL_693282, EPI_ISL_693283, EPI_ISL_693284, EPI_ISL_693285, EPI_ISL_693290, EPI_ISL_693297, EPI_ISL_849682, EPI_ISL_849683, EPI_ISL_849685, EPI_ISL_849686, EPI_ISL_849691, EPI_ISL_849692, EPI_ISL_849693, EPI_ISL_849694, EPI_ISL_849727, EPI_ISL_849728, EPI_ISL_849729, EPI_ISL_849730, EPI_ISL_849732, EPI_ISL_849734, EPI_ISL_849735, EPI_ISL_849744, EPI_ISL_849746, EPI_ISL_849750, EPI_ISL_849751, EPI_ISL_849752, EPI_ISL_849753, EPI_ISL_849757, EPI_ISL_849759, EPI_ISL_849760, EPI_ISL_849762 | see above | Public Health Virology Laboratory, Forensic and Scientific Services (PHV-FSS)                       | Public Health Virology Laboratory, Forensic and Scientific Services (PHV-FSS)                                                                                                                   | Son Nguyen et al                                                                                                                                                                                                                                                                                                                                                                                                                                                                                                                                                                                                                                                                                              |
| EPI_ISL_985234, EPI_ISL_985235, EPI_ISL_1061309, EPI_ISL_1061310, EPI_ISL_1121039, EPI_ISL_1121040                                                                                                                                                                                                                                                                                                                                                                                                                                                                                                             |           | Public Health Virology-Forensic and Scientific Services                                             | Public Health Virology-Forensic and Scientific Services                                                                                                                                         | Son Nguyen; Son Nguyen et al                                                                                                                                                                                                                                                                                                                                                                                                                                                                                                                                                                                                                                                                                  |
| EPI_ISL_944644, EPI_ISL_944736, EPI_ISL_944737, EPI_ISL_944739, EPI_ISL_944741, EPI_ISL_944742, EPI_ISL_944743, EPI_ISL_944744, EPI_ISL_944748, EPI_ISL_962180, EPI_ISL_968081                                                                                                                                                                                                                                                                                                                                                                                                                                 | see above | Public Health Virology-Forensic and Scientific Services (PHV-FSS)                                   | Public Health Virology-Forensic and Scientific Services (PHV-FSS)                                                                                                                               | Alyssa T. Pyke et al.; Son Nguyen et al                                                                                                                                                                                                                                                                                                                                                                                                                                                                                                                                                                                                                                                                       |
| EPI_ISL_513313                                                                                                                                                                                                                                                                                                                                                                                                                                                                                                                                                                                                 |           | Public Health, United States Air Force School of Aerospace Medicine                                 | Public Health, United States Air Force School of Aerospace Medicine                                                                                                                             | A.C.; A.K.; A.W.; B.C.; C.R.; Chappleau; Connors; E.A.; Fries; J.R.; Javorina; Lambert; Macias; Meyer; Purves; R.R. and Starr; S.M.                                                                                                                                                                                                                                                                                                                                                                                                                                                                                                                                                                           |
| EPI_ISL_434550, EPI_ISL_434552, EPI_ISL_434553                                                                                                                                                                                                                                                                                                                                                                                                                                                                                                                                                                 |           | Puerto Rico Department of Health                                                                    | Centers for Disease Control and Prevention, Dengue Branch                                                                                                                                       | Betzabel Flores; Chaney Kalinich; Fabiola Cruz; Gilberto A. Santiago; Glenda Gonzalez; Jessica I. Falcon; Jorge L. Munoz-Jordan; Joseph Fauver; Keyla Charriez; Nathan Grubaugh                                                                                                                                                                                                                                                                                                                                                                                                                                                                                                                               |
| EPI_ISL_579558, EPI_ISL_960225, EPI_ISL_1055464, EPI_ISL_1055553, EPI_ISL_1055621, EPI_ISL_1055647, EPI_ISL_1055690, EPI_ISL_1055718                                                                                                                                                                                                                                                                                                                                                                                                                                                                           | see above | QeII Health Sciences Centre                                                                         | National Microbiology Laboratory (NML)                                                                                                                                                          | Anna Majer; Anneliese Landgraaf; CanCOGen's metadata curation team; Dan Gaston; Darian Hole; Elsie Grudeski; Gary Van Domselaar; Grace Seo;                                                                                                                                                                                                                                                                                                                                                                                                                                                                                                                                                                   |

|                                                                                                                                                                                                                                                                                                                                                                                                                                         |                                                                                                                         |                                                                                                                                                                                                                                                                                                                                                                                                                                                                                                                                                          |                                                                                                                                                                                                                                                                                                                                                                                                                                                                                                                                                              |
|-----------------------------------------------------------------------------------------------------------------------------------------------------------------------------------------------------------------------------------------------------------------------------------------------------------------------------------------------------------------------------------------------------------------------------------------|-------------------------------------------------------------------------------------------------------------------------|----------------------------------------------------------------------------------------------------------------------------------------------------------------------------------------------------------------------------------------------------------------------------------------------------------------------------------------------------------------------------------------------------------------------------------------------------------------------------------------------------------------------------------------------------------|--------------------------------------------------------------------------------------------------------------------------------------------------------------------------------------------------------------------------------------------------------------------------------------------------------------------------------------------------------------------------------------------------------------------------------------------------------------------------------------------------------------------------------------------------------------|
|                                                                                                                                                                                                                                                                                                                                                                                                                                         |                                                                                                                         |                                                                                                                                                                                                                                                                                                                                                                                                                                                                                                                                                          | Janice Pettipas; Jason LeBlanc; Jennifer Tanner; Kirsten Biggar; Madison Chapel; Morag Graham; Natalie Knox; Nathalie Bastien; Philip Mabon; Public Health Agency of Canada CanCOGen team; Public Health Agency of Canada's CanCOGen team; Rhiannon Huzarewicz; Russell Mandes; Shari Tyson; Timothy Booth; Todd Hachette; Yan Li                                                                                                                                                                                                                            |
| EPI_ISL_432925                                                                                                                                                                                                                                                                                                                                                                                                                          | Queens Medical Centre, Clinical Microbiology Department / DeepSeq Nottingham                                            | COVID-19 Genomics UK (COG-UK) Consortium                                                                                                                                                                                                                                                                                                                                                                                                                                                                                                                 | Christopher Moore; Fei Sang; Gemma Clark; Hannah Howson-Wells; Johnny Debebe; Jonathan Ball; Joseph Chappell; Manjinder Khakh; Matthew Carlisle; Matthew Loose; Nadine Holmes; Patrick McClure; Theocharis Tsoleridis; Victoria Wright; Wendy Smith                                                                                                                                                                                                                                                                                                          |
| EPI_ISL_530239, EPI_ISL_530247, EPI_ISL_530249, EPI_ISL_530250, EPI_ISL_530283                                                                                                                                                                                                                                                                                                                                                          | Queensland Health Forensic and Scientific Services, Public Health Virology                                              | Public Health Virology Laboratory, Forensic and Scientific Services, Queensland Health                                                                                                                                                                                                                                                                                                                                                                                                                                                                   | Son Nguyen et al                                                                                                                                                                                                                                                                                                                                                                                                                                                                                                                                             |
| EPI_ISL_498696, EPI_ISL_498737, EPI_ISL_571553, EPI_ISL_603866, EPI_ISL_855100, EPI_ISL_876836, EPI_ISL_876839, EPI_ISL_876851, EPI_ISL_876853, EPI_ISL_876854, EPI_ISL_876856, EPI_ISL_876859, EPI_ISL_876909, EPI_ISL_937026                                                                                                                                                                                                          | see above                                                                                                               | Quest Diagnostics                                                                                                                                                                                                                                                                                                                                                                                                                                                                                                                                        | Anderson, B.; Bernstein; D.F.; Gerasimova, A.; Grover, D.; Hua, M.; I.A.; K.E.; Kagan; L.E.; Lacbawan, F.; Liu Y.; Livingston; Owen, R.; Perez, A.; R.M.; R.M. and Owen, R.; Rosenthal; S.H.; Shalhout; Shlyakhter; Tanpaiboon, P.                                                                                                                                                                                                                                                                                                                           |
| EPI_ISL_1086289, EPI_ISL_1086509, EPI_ISL_1086839, EPI_ISL_1086852, EPI_ISL_1086901, EPI_ISL_1086950, EPI_ISL_1087190, EPI_ISL_1087266, EPI_ISL_1087472, EPI_ISL_1087603, EPI_ISL_1087747, EPI_ISL_1087757, EPI_ISL_1088251, EPI_ISL_1088544, EPI_ISL_1090317, EPI_ISL_1090577, EPI_ISL_1090605, EPI_ISL_1090743, EPI_ISL_1090928, EPI_ISL_1091068, EPI_ISL_1091081, EPI_ISL_1114126, EPI_ISL_1114543, EPI_ISL_1114633, EPI_ISL_1114656 | see above                                                                                                               | Quest Diagnostics Incorporated                                                                                                                                                                                                                                                                                                                                                                                                                                                                                                                           | A. Gerasimova; A. Perez; B. Anderson; Ben L. Rambo-Martin; Clinton R. Paden; Dakota Howard; Dhvani Batra; Duncan MacCannell; F. Lacbawan; I. A. Shlyakhter; K.E. Livingston; L.E. Bernstein; M. Hua; P. Tanpaiboon; Peter W. Cook; R. M. Kagan; R. Owen; R. V. Rolando; S. H. Rosenthal; Suxiang Tong; Y. Liu                                                                                                                                                                                                                                                |
| EPI_ISL_415641, EPI_ISL_415643                                                                                                                                                                                                                                                                                                                                                                                                          | R. G. Lugar Center for Public Health Research, National Center for Disease Control and Public Health (NCDC) of Georgia. | R. G. Lugar Center for Public Health Research, National Center for Disease Control and Public Health (NCDC) of Georgia.                                                                                                                                                                                                                                                                                                                                                                                                                                  | Adam Kotorashvili; Amiran Gamkrelidze.; Ana Papkiuri; Ann Machabishvili; Anna Kasradze; Davit Tsaguria; Ekaterine Khmaladze; Ekaterine Zangaladze; Ekaterine Zghenti; Giorgi Tomashvili; Gvantsa Brachveli; Gvantsa Chanturia; Irma Burjanadze; Ketevan Sidamondze; Khatuna Zakhashvili; Lela Sabadze; Lela Urushadze; Magda Dgebuadze; Maia Alkhazashvili; Mari Gavashelidze; Mariam Zakatashvili; Marine Murtskhvaladze; Meri Pantsulaia; Nato Kotaria; Nino Berishvili; Paata Innadze; Roena Sukhiasvili; Tamar Jashiasvili; Tata Innadze; Tea Tvedoradze |
| EPI_ISL_1061412                                                                                                                                                                                                                                                                                                                                                                                                                         | RHS - PRO MIMAROPA                                                                                                      | Research Institute for Tropical Medicine                                                                                                                                                                                                                                                                                                                                                                                                                                                                                                                 | Catalino Demetria; Daria Manalo; Edelwisa Mercado; Francisco Gerardo Polotan; Hannah Leah Morito; Inez Andrea Medado; John Leonard Chan; Joseph Hughes; Kirstyn Brunker; Ma Angelica Tujan; Othoniel Jan Onza                                                                                                                                                                                                                                                                                                                                                |
| EPI_ISL_1094355                                                                                                                                                                                                                                                                                                                                                                                                                         | RI State Health Laboratories                                                                                            | Respiratory Viruses Branch, Division of Viral Diseases, Centers for Disease Control and Prevention                                                                                                                                                                                                                                                                                                                                                                                                                                                       | Anna Montmayeur; Anna Uehara; Ben L. Rambo-Martin; Clinton R. Paden; Dhvani Batra; Haibin Wang; Jasmine Padilla; Jing Zhang; Justin Lee; Krista Queen; Lori Rowe; Mark Burroughs; Mili Sheth; Peter W. Cook; Rachel Marine; Sarah Nobles; Suxiang Tong; Yan Li; Ying Tao                                                                                                                                                                                                                                                                                     |
| EPI_ISL_766039                                                                                                                                                                                                                                                                                                                                                                                                                          | RS Bhayangkara Tk. III                                                                                                  | Eijkman Institute for Molecular Biology, Ministry of Research and Technology/National Agency for Research and Innovation                                                                                                                                                                                                                                                                                                                                                                                                                                 | Amin Soebandrio; David H Muljono; Edison Johar; Filasita A Yudhaputri; Hidayat Trimarsanto; Khin Saw Myint; Safarina G Malik                                                                                                                                                                                                                                                                                                                                                                                                                                 |
| EPI_ISL_947257                                                                                                                                                                                                                                                                                                                                                                                                                          | RS Bina Husada Cibinong                                                                                                 | Eijkman Institute for Molecular Biology, Ministry of Research and Technology/National Agency for Research and Innovation                                                                                                                                                                                                                                                                                                                                                                                                                                 | Amin Soebandrio; Edison Johar; Filasita A Yudhaputri; Hidayat Trimarsanto; Iskandar Adnan; Khin Saw Myint; Lydia V. Panggalo; Safarina G Malik; Sukma Oktavianthi; Willy Agustine                                                                                                                                                                                                                                                                                                                                                                            |
| EPI_ISL_888983                                                                                                                                                                                                                                                                                                                                                                                                                          | RS Hermina Daan Mogot                                                                                                   | Eijkman Institute for Molecular Biology, Ministry of Research and Technology/National Agency for Research and Innovation                                                                                                                                                                                                                                                                                                                                                                                                                                 | Amin Soebandrio; Edison Johar; Filasita A Yudhaputri; Hidayat Trimarsanto; Iskandar Adnan; Khin Saw Myint; Lydia V. Panggalo; Safarina G Malik; Sukma Oktavianthi; Willy Agustine                                                                                                                                                                                                                                                                                                                                                                            |
| EPI_ISL_833505, EPI_ISL_833507                                                                                                                                                                                                                                                                                                                                                                                                          | RS MMC, Jakarta, Indonesia                                                                                              | Biosafety Level-3 Laboratory, Indonesian Institute of Sciences (LIPI)                                                                                                                                                                                                                                                                                                                                                                                                                                                                                    | Ade Andriani; Ahmad Fathoni; Andri Wardiana; Anggia Prasetyoputri; Anik Budhi Dharmayanthi; Isa Nuryana; Muhammad Ridwan; Pangda Sopha; Ratih Asmana Ningrum; Syaiful Rizal; Syam Budi Iryanto                                                                                                                                                                                                                                                                                                                                                               |
| EPI_ISL_889020                                                                                                                                                                                                                                                                                                                                                                                                                          | RS Omni Cikarang                                                                                                        | Eijkman Institute for Molecular Biology, Ministry of Research and Technology/National Agency for Research and Innovation                                                                                                                                                                                                                                                                                                                                                                                                                                 | Amin Soebandrio; Edison Johar; Filasita A Yudhaputri; Hidayat Trimarsanto; Iskandar Adnan; Khin Saw Myint; Lydia V. Panggalo; Safarina G Malik; Sukma Oktavianthi; Willy Agustine                                                                                                                                                                                                                                                                                                                                                                            |
| EPI_ISL_833496                                                                                                                                                                                                                                                                                                                                                                                                                          | RS PMI Bogor, Indonesia                                                                                                 | Biosafety Level-3 Laboratory, Indonesian Institute of Sciences (LIPI)                                                                                                                                                                                                                                                                                                                                                                                                                                                                                    | Ade Andriani; Ahmad Fathoni; Andri Wardiana; Anggia Prasetyoputri; Anik Budhi Dharmayanthi; Arie Wulandari; Isa Nuryana; Ratih Asmana Ningrum; Syam Budi Iryanto; Yana Rubiyana                                                                                                                                                                                                                                                                                                                                                                              |
| EPI_ISL_1117451                                                                                                                                                                                                                                                                                                                                                                                                                         | RS PMI, Bogor, West Java                                                                                                | Biosafety Level-3 Laboratory, Indonesian Institute of Sciences (LIPI)                                                                                                                                                                                                                                                                                                                                                                                                                                                                                    | Ade Andriani; Anik Budhi Dharmayanthi; Asep M. Ridwanuloh; Eko Wahyu Putro; Gita Syahputra; Hariyatun; Inswasti Cahyani; Matthew W. Loose; Mohammad Ilyas; Susanti; Syam Budi Iryanto; Wien Kusharyoto                                                                                                                                                                                                                                                                                                                                                       |
| EPI_ISL_888990                                                                                                                                                                                                                                                                                                                                                                                                                          | RS Pondok Indah Bintaro Jaya                                                                                            | Eijkman Institute for Molecular Biology, Ministry of Research and Technology/National Agency for Research and Innovation                                                                                                                                                                                                                                                                                                                                                                                                                                 | Amin Soebandrio; Edison Johar; Filasita A Yudhaputri; Hidayat Trimarsanto; Iskandar Adnan; Khin Saw Myint; Lydia V. Panggalo; Safarina G Malik; Sukma Oktavianthi; Willy Agustine                                                                                                                                                                                                                                                                                                                                                                            |
| EPI_ISL_574611                                                                                                                                                                                                                                                                                                                                                                                                                          | RS Premier Bintaro                                                                                                      | Eijkman Institute for Molecular Biology, Ministry of Research and Technology/National Agency for Research and Innovation                                                                                                                                                                                                                                                                                                                                                                                                                                 | Amin Soebandrio; David H Muljono; Edison Johar; Filasita A Yudhaputri; Herawati Sudoyo; Hidayat Trimarsanto; Iskandar A Adnan; Khin Saw Myint; Safarina G Malik; Willy Agustine                                                                                                                                                                                                                                                                                                                                                                              |
| EPI_ISL_791985                                                                                                                                                                                                                                                                                                                                                                                                                          | RS Santa Maria Pekanbaru                                                                                                | National Institute of Health Research and Development                                                                                                                                                                                                                                                                                                                                                                                                                                                                                                    | AA; Fridayenti; HA; HD; Ikawati; KD; KNA; N; Nugraha; Pangesti; Pawestri; Puspa; Puspandari; Setiawaty; Soekarso; Subangkit; T; V                                                                                                                                                                                                                                                                                                                                                                                                                            |
| EPI_ISL_766042                                                                                                                                                                                                                                                                                                                                                                                                                          | RS Sari Asih Ciledug                                                                                                    | Eijkman Institute for Molecular Biology, Ministry of Research and Technology/National Agency for Research and Innovation                                                                                                                                                                                                                                                                                                                                                                                                                                 | Amin Soebandrio; David H Muljono; Edison Johar; Filasita A Yudhaputri; Hidayat Trimarsanto; Khin Saw Myint; Safarina G Malik                                                                                                                                                                                                                                                                                                                                                                                                                                 |
| EPI_ISL_1020183                                                                                                                                                                                                                                                                                                                                                                                                                         | RS Trimitra, Bogor, West java                                                                                           | Biosafety Level-3 Laboratory, Indonesian Institute of Sciences (LIPI)                                                                                                                                                                                                                                                                                                                                                                                                                                                                                    | Ali T. Fathurahman; Idris; Linda Sukmarini; Masrukhin; Ratih Asmana Ningrum; Ruby Setiawan; Sri Swasthikawati; Sugiyono Saputra                                                                                                                                                                                                                                                                                                                                                                                                                              |
| EPI_ISL_454497, EPI_ISL_454511                                                                                                                                                                                                                                                                                                                                                                                                          | RSE "National Center for Biotechnology"                                                                                 | RSE "National Center for Biotechnology"                                                                                                                                                                                                                                                                                                                                                                                                                                                                                                                  | Akbota Rakhmetova; Alexandr Shevtsov; Askar Abdaliyev; Asylulan Amirgazin; Ilyas Akhmetolayev; Ruslan Kalendar; Viktoriya Lutsay; Yerlan Ramankulov; Zabira Aushakhmetova                                                                                                                                                                                                                                                                                                                                                                                    |
| EPI_ISL_947304                                                                                                                                                                                                                                                                                                                                                                                                                          | RSU Harapan Bunda                                                                                                       | Eijkman Institute for Molecular Biology, Ministry of Research and Technology/National Agency for Research and Innovation                                                                                                                                                                                                                                                                                                                                                                                                                                 | Amin Soebandrio; Edison Johar; Filasita A Yudhaputri; Hidayat Trimarsanto; Iskandar Adnan; Khin Saw Myint; Lydia V. Panggalo; Safarina G Malik; Sukma Oktavianthi; Willy Agustine                                                                                                                                                                                                                                                                                                                                                                            |
| EPI_ISL_791980                                                                                                                                                                                                                                                                                                                                                                                                                          | RSUD Blambangan Banyuwangi                                                                                              | National Institute of Health Research and Development                                                                                                                                                                                                                                                                                                                                                                                                                                                                                                    | AA; HA; HD; Ikawati; KD; KNA; N; Noor; Nugraha; Pangesti; Pawestri; Puspa; Puspandari; RI; Setiawaty; Soekarso; Subangkit; T; V                                                                                                                                                                                                                                                                                                                                                                                                                              |
| EPI_ISL_985397                                                                                                                                                                                                                                                                                                                                                                                                                          | RSUD Dr. Tjitrowardoyo                                                                                                  | Genetics Working Group (Pokja Genetik) Faculty of Medicine, Public Health and Nursing Universitas Gadjah Mada (FK-KMK UGM); Disease Investigation Center Wates Ministry of Agriculture Indonesia; Department of Microbiology FK-KMK UGM; Laboratorium Diagnostik Yayasan Tahija World Mosquito Program (WMP) Yogyakarta Center for Tropical Medicine FK-KMK UGM; Integrated Research Center FK-KMK UGM; Department of Computer Science and Electronics FMIPA UGM; Balai Besar Teknik Kesehatan Lingkungan dan Pengendalian Penyakit (BBTKLPP) Yogyakarta | Afiahayati; Arry Setyowati; Chusni Mubarakh; Dwi AA Nugrahaningsih; Edwin W. Daniwijaya; Eggi Arguni; Endah Supriyati; Gunadi; Havid Setyawan; Hendra Wibawa; Indaryati; Irene; Kristy Iskandar; Ludhang P. Rizki; Marcellus; Mohamad S. Hakim; Nungki Anggorowati; Siswanto; Titik Nuryastuti; Tri Wibawa; Try Nirmala Sari; Untung Riawan; William Widitjirso                                                                                                                                                                                              |
| EPI_ISL_529966                                                                                                                                                                                                                                                                                                                                                                                                                          | RSUD Sidoarjo                                                                                                           | Institute of Tropical Disease, Universitas Airlangga                                                                                                                                                                                                                                                                                                                                                                                                                                                                                                     | Aldise M Nastri; Atok Irawan; Gatot Soegiarto; Jezza R Dewantari; Kazufumi Shimizu; Krisnoadi Rahardjo; Laksmi Wulandari; Maria I Lusida; Mitsuhiro Nishimura; Resti Yudhawati; Retno A Setyoningrum; Rima R Prasetya; Soetjpto; Yasuko Mori; Yohko K Shimizu                                                                                                                                                                                                                                                                                                |
| EPI_ISL_576115                                                                                                                                                                                                                                                                                                                                                                                                                          | RSUP Dr Sardjito                                                                                                        | Genetics Working Group (Pokja Genetik) Faculty of Medicine, Public Health and Nursing Universitas Gadjah Mada (FK-KMK UGM); Disease Investigation Center Wates Ministry of Agriculture Indonesia; Department of Microbiology FK-KMK UGM; Laboratorium Diagnostik Yayasan Tahija World Mosquito Program (WMP) Yogyakarta Center for Tropical Medicine FK-KMK UGM; Integrated Research Center FK-KMK UGM; Department of Computer Science and Electronics FMIPA UGM                                                                                         | . Marcellus; Afiahayati; Dwi AA Nugrahaningsih; Edwin W. Daniwijaya; Eggi Arguni; Endah Supriyati; Gunadi; Hendra Wibawa; Ika Trisnawati; Ira Puspitawati; Kristy Iskandar; Ludhang P. Rizki; Maria Patricia Inggriani; Mohamad S. Hakim; Nungki Anggorowati; Nur Imma Fatimah Harahap; Osman Sianipar; Riat El Khair; Siswanto; Titik Nuryastuti; Tri Wibawa; Umi Solekhhah Intansari; Untung Wirawan; Yunika Puspawati; Elizabeth Henry Herringtiyas                                                                                                       |

|                                                                                                                                                                                                                                                                                                                                                                                                                                                                                                                                                                                                                                 |                                                                                                                                                                                                          |                                                                                                                                                                                                                                                                                                                                                                                                                                                                  |                                                                                                                                                                                                                                                                                                                                                                                                                                                                                                                                                                                             |
|---------------------------------------------------------------------------------------------------------------------------------------------------------------------------------------------------------------------------------------------------------------------------------------------------------------------------------------------------------------------------------------------------------------------------------------------------------------------------------------------------------------------------------------------------------------------------------------------------------------------------------|----------------------------------------------------------------------------------------------------------------------------------------------------------------------------------------------------------|------------------------------------------------------------------------------------------------------------------------------------------------------------------------------------------------------------------------------------------------------------------------------------------------------------------------------------------------------------------------------------------------------------------------------------------------------------------|---------------------------------------------------------------------------------------------------------------------------------------------------------------------------------------------------------------------------------------------------------------------------------------------------------------------------------------------------------------------------------------------------------------------------------------------------------------------------------------------------------------------------------------------------------------------------------------------|
| EPI_ISL_576113                                                                                                                                                                                                                                                                                                                                                                                                                                                                                                                                                                                                                  | RSUP Dr. Sardjito                                                                                                                                                                                        | Genetics Working Group (Pokja Genetik) Faculty of Medicine, Public Health and Nursing Universitas Gadjah Mada (FK-KMK UGM); Disease Investigation Center Wates Ministry of Agriculture Indonesia; Department of Microbiology FK-KMK UGM; Laboratorium Diagnostik Yayasan Tahija World Mosquito Program (WMP) Yogyakarta Center for Tropical Medicine FK-KMK UGM; Integrated Research Center FK-KMK UGM; Department of Computer Science and Electronics FMIPA UGM | Marcellus; Afiahayati; Dwi AA Nugrahaningsih; Edwin W. Daniwijaya; Eggi Arguni; Endah Supriyati; Fadil Fahri; Gunadi; Hendra Wibawa; Ika Trisnawati; Kristy Iskandar; Ludhang P. Rizki; Mohamad S. Hakim; Nungki Anggorowati; Riat El Khair; Siswanto; Titik Nuryastuti; Tri Wibawa; William Widitjarsjo                                                                                                                                                                                                                                                                                    |
| EPI_ISL_637112                                                                                                                                                                                                                                                                                                                                                                                                                                                                                                                                                                                                                  | Rafik Hariri University Hospital                                                                                                                                                                         | Microbial Pathogenomics Lab                                                                                                                                                                                                                                                                                                                                                                                                                                      | Georgi Merhi; Rita Feghali; Sima Tokajian; Tamara Salloum                                                                                                                                                                                                                                                                                                                                                                                                                                                                                                                                   |
| EPI_ISL_450509, EPI_ISL_450512                                                                                                                                                                                                                                                                                                                                                                                                                                                                                                                                                                                                  | Rafik Hariri University Hospital                                                                                                                                                                         | Rafik Hariri University Hospital                                                                                                                                                                                                                                                                                                                                                                                                                                 | Rita Feghali                                                                                                                                                                                                                                                                                                                                                                                                                                                                                                                                                                                |
| EPI_ISL_1073971, EPI_ISL_1073973                                                                                                                                                                                                                                                                                                                                                                                                                                                                                                                                                                                                | Ramathibodi Hospital                                                                                                                                                                                     | COVID-19 Network Investigations (CONI) Alliance                                                                                                                                                                                                                                                                                                                                                                                                                  | Angkana Huang; Anthony R. Jones; Arporn Wangwiwatsin; Bhakbhoom Panthan; Chonticha Klungtong; Duangkamon Loesbanluechai; Ekawat Pasomsud; Elizabeth Batty; Insee Semsorn; Janjira Thaipadungpanit; Khajohn Joonlasak; Kingkan Rakmanee; Krittikorn Kumpornsri; Namfon Kotanan; Stefan Fernandez; Thanat Chookajorn; Theerarat Kochakarn; Treawat Watthanachockchai; Wasun Chantrattita; Wudtichai Manasatienkij                                                                                                                                                                             |
| EPI_ISL_768524, EPI_ISL_768528                                                                                                                                                                                                                                                                                                                                                                                                                                                                                                                                                                                                  | Regional Medical Sciences Center 1/1 Chiang Rai                                                                                                                                                          | National Institute of Health, Department of Medical Sciences, Ministry of Public Health, Thailand                                                                                                                                                                                                                                                                                                                                                                | ; Natchaya Khadsang; Pakorn Piromtong; Pilailuk Okada; Ratana Tacharoenmuang; Siripaporn Phuygun; Sittiporn Parmmen; Sunthareeya Waicharoen; Thanutsapa Thanadachakul; Warawan Wongboot; sirikanda wimol                                                                                                                                                                                                                                                                                                                                                                                    |
| EPI_ISL_768530                                                                                                                                                                                                                                                                                                                                                                                                                                                                                                                                                                                                                  | Regional Medical Sciences Center 5 Samut Songkhram                                                                                                                                                       | National Institute of Health, Department of Medical Sciences, Ministry of Public Health, Thailand                                                                                                                                                                                                                                                                                                                                                                | ; Natchaya Khadsang; Pakorn Piromtong; Pilailuk Okada; Ratana Tacharoenmuang; Siripaporn Phuygun; Sittiporn Parmmen; Sunthareeya Waicharoen; Thanutsapa Thanadachakul; Warawan Wongboot; sirikanda wimol                                                                                                                                                                                                                                                                                                                                                                                    |
| EPI_ISL_866398                                                                                                                                                                                                                                                                                                                                                                                                                                                                                                                                                                                                                  | Regional Virus Laboratory, Belfast Health and Social Care Trust                                                                                                                                          | COVID-19 Genomics UK (COG-UK) Consortium                                                                                                                                                                                                                                                                                                                                                                                                                         | Alison Watt; Ciara Cox; Conall McCaughey; David Simpson; Derek Fairley; James McKenna; Mairead Connor; Susan Feeney; Tanya Curran; Zoltan Molnar                                                                                                                                                                                                                                                                                                                                                                                                                                            |
| EPI_ISL_708797, EPI_ISL_708801, EPI_ISL_708808                                                                                                                                                                                                                                                                                                                                                                                                                                                                                                                                                                                  | Regional medical sciences center 6 chonburi                                                                                                                                                              | National Institute of Health, Department of Medical Sciences, Ministry of Public Health, Thailand                                                                                                                                                                                                                                                                                                                                                                | Malinee Chittaganpitch; Pakorn Piromtong; Pilailuk Okada; Siripaporn Phuygun; Sittiporn Parmmen; Sunthareeya Waicharoen; Thanutsapa Thanadachakul; Warawan Wongboot                                                                                                                                                                                                                                                                                                                                                                                                                         |
| EPI_ISL_661271                                                                                                                                                                                                                                                                                                                                                                                                                                                                                                                                                                                                                  | Research platform for Transfusion-transmitted Disease, Institute of Blood Transfusion, Chinese Academy of Medical Sciences                                                                               | Research platform for Transfusion-transmitted Disease, Institute of Blood Transfusion, Chinese Academy of Medical Sciences                                                                                                                                                                                                                                                                                                                                       | He; M. and Fan, Z.                                                                                                                                                                                                                                                                                                                                                                                                                                                                                                                                                                          |
| EPI_ISL_1008908                                                                                                                                                                                                                                                                                                                                                                                                                                                                                                                                                                                                                 | Resolve Diagnostics                                                                                                                                                                                      | Pathogen Discovery, Respiratory Viruses Branch, Division of Viral Diseases, Centers for Disease Control and Prevention                                                                                                                                                                                                                                                                                                                                           | Anna Uehara; Clinton R. Paden; Haibin Wang; Jing Zhang; Krista Queen; Peter Cook; Suxiang Tong; Yan Li; Ying Tao                                                                                                                                                                                                                                                                                                                                                                                                                                                                            |
| EPI_ISL_464194                                                                                                                                                                                                                                                                                                                                                                                                                                                                                                                                                                                                                  | Respiratory Virus Unit, Microbiology Services Colindale, Public Health England                                                                                                                           | Respiratory Virus Unit, Microbiology Services Colindale, Public Health England                                                                                                                                                                                                                                                                                                                                                                                   | PHE Covid Sequencing Team                                                                                                                                                                                                                                                                                                                                                                                                                                                                                                                                                                   |
| EPI_ISL_747032, EPI_ISL_747033, EPI_ISL_747034, EPI_ISL_747059, EPI_ISL_747085, EPI_ISL_747087, EPI_ISL_747088, EPI_ISL_747099, EPI_ISL_747107, EPI_ISL_747109, EPI_ISL_747119, EPI_ISL_747127, EPI_ISL_747143, EPI_ISL_747145, EPI_ISL_747173, EPI_ISL_803101, EPI_ISL_803103, EPI_ISL_884738, EPI_ISL_906848, EPI_ISL_906851                                                                                                                                                                                                                                                                                                  |                                                                                                                                                                                                          |                                                                                                                                                                                                                                                                                                                                                                                                                                                                  |                                                                                                                                                                                                                                                                                                                                                                                                                                                                                                                                                                                             |
| see above                                                                                                                                                                                                                                                                                                                                                                                                                                                                                                                                                                                                                       | Respiratory Viruses Branch, Centers for Disease Control and Prevention                                                                                                                                   | Respiratory Viruses Branch, Centers for Disease Control and Prevention                                                                                                                                                                                                                                                                                                                                                                                           | Allen, E.; Antico, J.; Ascencio, A.; B.L.; Barret, Batra, D.; Becker, D.; Bolze, A.; C.R.; Cassens, T.; Cho, R.; Cirulli, E.; Cook, Cook, P.; Febbo, P.; Galloway, S.; Gietzen, K.; Isaksson, M.; K.S.; Laurent, M.; Lee, J.; Lee, W.; Leván, G.; Li, Y.; Liu, J.; Lu, J.; MacCannell, D.; Marine, R.; Montmayeur, A.; N.L.; Nguyen, J.; P.W.; Paden, Queen, K.; Rambo-Martin; Ramirez, J.; Rivera-Garcia, C.; Sandoval, E.; Sheth, M.; Sickler, B.; Tao, Y.; Tolentino, M.; Tong, S.; Tran, C.; Uehara, A.; Wang, H.; Wang, S.; Washington; White, S.; Wickline, S.; Zhang, J.; de Feo, E. |
| EPI_ISL_1040778                                                                                                                                                                                                                                                                                                                                                                                                                                                                                                                                                                                                                 | Retreat CHC wc RHC                                                                                                                                                                                       | NHLS/UCT                                                                                                                                                                                                                                                                                                                                                                                                                                                         | Arash Iranzadeh; Bruna Galvao; Carolyn Williamson; Deelan Doolabh; Diana Hardie; Innocent Mudau; Kruger Marais; Lynn Tyers; Marvin Hsiao; Stephen Korsman                                                                                                                                                                                                                                                                                                                                                                                                                                   |
| EPI_ISL_872703, EPI_ISL_872738, EPI_ISL_977049, EPI_ISL_1121855, EPI_ISL_1121972                                                                                                                                                                                                                                                                                                                                                                                                                                                                                                                                                | Rhode Island Department of Health                                                                                                                                                                        | Infectious Disease Program, Broad Institute of Harvard and MIT                                                                                                                                                                                                                                                                                                                                                                                                   | Adams, G.; Azevedo, K.; B.L.; B.W.; Bauer, M.; Birren; Carter, A.; Chaluvadi, S.; D.J.; DeRuff, K.; Gallagher, G.; Gladden-Young, A.; Huard, R.; J.E.; K.J.; King, E.; Lagerborg, K.; Lemieux; Loreth, C.; MacInnis; Miller, A.; Normandin, E.; P.C.; Park; Reilly, S.; Rudy, M.; Siddle; Smole, S.; Tomkins-Tinch, C.; and Sabeti                                                                                                                                                                                                                                                          |
| EPI_ISL_514131                                                                                                                                                                                                                                                                                                                                                                                                                                                                                                                                                                                                                  | Rondônia Central Public Health Laboratory (LACEN/RO), vinculated to State Health Secretariat of Rondônia (SESAU/RO)                                                                                      | Molecular Virology Laboratory of Oswaldo Cruz Foundation of Rondônia                                                                                                                                                                                                                                                                                                                                                                                             | Adriana Cristina Salvador Maia; Alcione de Oliveira dos Santos; Alice Paula Di Sabatino Guimarães; Aline Linhares Ferreira de Melo Mendonça; Caio Henrique Nemeth Santos; Camila Flávia Gomes Azzi; Celina Aparecida Bertoni Lugtenburg; Cicileia Correia da Silva; Felipe Gomes Naveca; Felipe Souza Nogueira-Lima; Fernando Rodrigues Máximo; Jansen Fernandes de Medeiros; Juan Miguel Vilalobos-Salcedo and Deusilene Souza Vieira1; Juliana Loca Furtado; Luan Felipe Botelho-Souza; Suelen Cavalcante; Tarcio Peixoto Roca; Rita de Cássia Pontello Rampazzo                          |
| EPI_ISL_521861, EPI_ISL_521862, EPI_ISL_779406, EPI_ISL_779408, EPI_ISL_779409, EPI_ISL_779410, EPI_ISL_779413, EPI_ISL_812423, EPI_ISL_854745                                                                                                                                                                                                                                                                                                                                                                                                                                                                                  |                                                                                                                                                                                                          |                                                                                                                                                                                                                                                                                                                                                                                                                                                                  |                                                                                                                                                                                                                                                                                                                                                                                                                                                                                                                                                                                             |
| see above                                                                                                                                                                                                                                                                                                                                                                                                                                                                                                                                                                                                                       | Royal Darwin Hospital Pathology                                                                                                                                                                          | MDU-PHL                                                                                                                                                                                                                                                                                                                                                                                                                                                          | Caly L.; Druce J.; M.L.; Meumann, E.; N.L.; Sait, Sait, M.; Schultz M.; Seemann T.; Sherry; Sherry, N.                                                                                                                                                                                                                                                                                                                                                                                                                                                                                      |
| EPI_ISL_577607                                                                                                                                                                                                                                                                                                                                                                                                                                                                                                                                                                                                                  | Royal Hobart Hospital                                                                                                                                                                                    | Royal Hobart Hospital                                                                                                                                                                                                                                                                                                                                                                                                                                            | Cooley L.; van Haeften R.                                                                                                                                                                                                                                                                                                                                                                                                                                                                                                                                                                   |
| EPI_ISL_522566, EPI_ISL_522611, EPI_ISL_522621, EPI_ISL_522686, EPI_ISL_522688, EPI_ISL_522705, EPI_ISL_522739                                                                                                                                                                                                                                                                                                                                                                                                                                                                                                                  |                                                                                                                                                                                                          |                                                                                                                                                                                                                                                                                                                                                                                                                                                                  |                                                                                                                                                                                                                                                                                                                                                                                                                                                                                                                                                                                             |
| see above                                                                                                                                                                                                                                                                                                                                                                                                                                                                                                                                                                                                                       | Royal Hobart Hospital Microbiology Department                                                                                                                                                            | MDU-PHL                                                                                                                                                                                                                                                                                                                                                                                                                                                          | Cooley L.; M.B.; Sait M.; Schultz; Seemann T.; Sherry N.; van Haeften R.                                                                                                                                                                                                                                                                                                                                                                                                                                                                                                                    |
| EPI_ISL_491298                                                                                                                                                                                                                                                                                                                                                                                                                                                                                                                                                                                                                  | Rural Health Unit - Calauan, Laguna                                                                                                                                                                      | Research Institute for Tropical Medicine                                                                                                                                                                                                                                                                                                                                                                                                                         | Bautista; Bruner, K.; C.S.; C.T.; D.L.; Demetria; E.S.; F.G.M.; I.A.P.; M.A.A.; Manalo; Medado; Mercado; O.J.T.; Onza; Polotan; Tujan                                                                                                                                                                                                                                                                                                                                                                                                                                                       |
| EPI_ISL_1063915, EPI_ISL_1064152, EPI_ISL_1064153, EPI_ISL_1064164, EPI_ISL_1064168, EPI_ISL_1064170                                                                                                                                                                                                                                                                                                                                                                                                                                                                                                                            | Rwanda National Reference Laboratory                                                                                                                                                                     | Rwanda National Reference Laboratory                                                                                                                                                                                                                                                                                                                                                                                                                             | ENatha Mukantwari; ENatha Mukantwari; Enatha Mukantwari; Enatha Mukantwari; Umuringa Jeanne d'Arc                                                                                                                                                                                                                                                                                                                                                                                                                                                                                           |
| EPI_ISL_467989, EPI_ISL_467995, EPI_ISL_468025, EPI_ISL_468032, EPI_ISL_468039, EPI_ISL_508132, EPI_ISL_513911, EPI_ISL_513912, EPI_ISL_603126, EPI_ISL_654795, EPI_ISL_654796, EPI_ISL_654797, EPI_ISL_654798, EPI_ISL_654799, EPI_ISL_654800, EPI_ISL_654801, EPI_ISL_654802, EPI_ISL_654803, EPI_ISL_654804, EPI_ISL_654805, EPI_ISL_654806, EPI_ISL_654807, EPI_ISL_654808, EPI_ISL_654809, EPI_ISL_732960, EPI_ISL_732961, EPI_ISL_752598, EPI_ISL_752599, EPI_ISL_755568, EPI_ISL_755569, EPI_ISL_755570, EPI_ISL_755571, EPI_ISL_771367, EPI_ISL_771368, EPI_ISL_812357, EPI_ISL_812358, EPI_ISL_855344, EPI_ISL_1029956 |                                                                                                                                                                                                          |                                                                                                                                                                                                                                                                                                                                                                                                                                                                  |                                                                                                                                                                                                                                                                                                                                                                                                                                                                                                                                                                                             |
| see above                                                                                                                                                                                                                                                                                                                                                                                                                                                                                                                                                                                                                       | SA Pathology                                                                                                                                                                                             | SA Pathology                                                                                                                                                                                                                                                                                                                                                                                                                                                     | Chuan Kok Lim; Geoff Higgins; Ivan Bastian; Julien Soubrier; Karin Kassahn; Lex Leong; Mark Turra; Song Gao                                                                                                                                                                                                                                                                                                                                                                                                                                                                                 |
| EPI_ISL_854441                                                                                                                                                                                                                                                                                                                                                                                                                                                                                                                                                                                                                  | SARATOGA HOSPITAL LABORATORY                                                                                                                                                                             | Wadsworth Center, New York State Department of Health                                                                                                                                                                                                                                                                                                                                                                                                            | Alexis Russel; Daryl M. Lamson; Erasmus Schneider; Erica Lasek-Nesselquist; John Kelly; Jonathan Plitnick; Kirsten St. George; Matthew Shudt; Melissa A Leisner; Navjot Singh                                                                                                                                                                                                                                                                                                                                                                                                               |
| EPI_ISL_1046762, EPI_ISL_1046763, EPI_ISL_1046765, EPI_ISL_1046772, EPI_ISL_1046784, EPI_ISL_1046787, EPI_ISL_1046790                                                                                                                                                                                                                                                                                                                                                                                                                                                                                                           |                                                                                                                                                                                                          |                                                                                                                                                                                                                                                                                                                                                                                                                                                                  |                                                                                                                                                                                                                                                                                                                                                                                                                                                                                                                                                                                             |
| see above                                                                                                                                                                                                                                                                                                                                                                                                                                                                                                                                                                                                                       | SARS-CoV-2 testing team, National Institute of Infectious Diseases                                                                                                                                       | Pathogen Genomics Center, National Institute of Infectious Diseases                                                                                                                                                                                                                                                                                                                                                                                              | Chang-Kweng Lim; Eri Nakayama; Kentaro Itokawa; Koichi Ishikawa; Makoto Kuroda; Masanori Hashino; Midori Nakamura-Hoshi; Motohiko Ogawa; Rina Tanaka; Shigeru Kusagawa; Shigeru Tajima; Takahiro Maeki; Tsuyoshi Sekizuka                                                                                                                                                                                                                                                                                                                                                                   |
| EPI_ISL_977616                                                                                                                                                                                                                                                                                                                                                                                                                                                                                                                                                                                                                  | SC (UCO) Igiene e Sanità Pubblica (funzione integrata con SC Microbiologia e Virologia) e Laboratory of Molecular Virology of the International Centre for Genetic Engineering and Biotechnology (ICGEB) | ARGO Laboratorio Genomica ed Epigenomica                                                                                                                                                                                                                                                                                                                                                                                                                         | D'Agaro P.; Dal Monego S.; Degasperri M.; Licastro D.; Marcello A.; Pipan C                                                                                                                                                                                                                                                                                                                                                                                                                                                                                                                 |
| EPI_ISL_751664, EPI_ISL_903668                                                                                                                                                                                                                                                                                                                                                                                                                                                                                                                                                                                                  | SC Dept of Health and Env. Control-Bureau of Laboratories                                                                                                                                                | Genomics and Discovery, Respiratory Viruses Branch, Division of Viral Diseases, Centers for Disease Control and Prevention                                                                                                                                                                                                                                                                                                                                       | Anna Montmayeur; Anna Uehara; Ben L. Rambo-Martin; Clinton R. Paden; Dhvani Batra; Haibin Wang; Jasmine Padilla; Jing Zhang; Justin Lee; Krista Queen; Lori Rowe; Mark Burroughs; Mili Sheth; Peter W. Cook; Rachel Marine; Sarah Nobles; Suxiang Tong; Yan Li; Ying Tao                                                                                                                                                                                                                                                                                                                    |
| EPI_ISL_903725, EPI_ISL_903744, EPI_ISL_903836, EPI_ISL_903894                                                                                                                                                                                                                                                                                                                                                                                                                                                                                                                                                                  | SD Public Health Laboratory                                                                                                                                                                              | Genomics and Discovery, Respiratory Viruses Branch, Division of Viral Diseases, Centers for Disease Control and Prevention                                                                                                                                                                                                                                                                                                                                       | Anna Montmayeur; Anna Uehara; Ben L. Rambo-Martin; Clinton R. Paden; Dhvani Batra; Haibin Wang; Jasmine Padilla; Jing Zhang; Justin Lee; Krista Queen; Lori Rowe; Mark Burroughs; Mili Sheth; Peter W. Cook; Rachel Marine; Sarah Nobles; Suxiang Tong; Yan Li; Ying Tao                                                                                                                                                                                                                                                                                                                    |

|                                                                                                                                                                                                                                                                                                                                                                                                                                                                                                                                                                                                                                                                                                                                                                                                                |                                                                                                                                                                                            |                                                                                                                                                                                                               |                                                                                                                                                                                                                                                                                                                                                                                                                                                                                                                                                                                                                                                     |
|----------------------------------------------------------------------------------------------------------------------------------------------------------------------------------------------------------------------------------------------------------------------------------------------------------------------------------------------------------------------------------------------------------------------------------------------------------------------------------------------------------------------------------------------------------------------------------------------------------------------------------------------------------------------------------------------------------------------------------------------------------------------------------------------------------------|--------------------------------------------------------------------------------------------------------------------------------------------------------------------------------------------|---------------------------------------------------------------------------------------------------------------------------------------------------------------------------------------------------------------|-----------------------------------------------------------------------------------------------------------------------------------------------------------------------------------------------------------------------------------------------------------------------------------------------------------------------------------------------------------------------------------------------------------------------------------------------------------------------------------------------------------------------------------------------------------------------------------------------------------------------------------------------------|
| EPI_ISL_1094374, EPI_ISL_1094542                                                                                                                                                                                                                                                                                                                                                                                                                                                                                                                                                                                                                                                                                                                                                                               | SD Public Health Laboratory                                                                                                                                                                | Respiratory Viruses Branch, Division of Viral Diseases, Centers for Disease Control and Prevention                                                                                                            | Anna Montmayeur; Anna Uehara; Ben L. Rambo-Martin; Clinton R. Paden; Dhvani Batra; Haibin Wang; Jasmine Padilla; Jing Zhang; Justin Lee; Krista Queen; Lori Rowe; Mark Burroughs; Mili Sheth; Peter W. Cook; Rachel Marine; Sarah Nobles; Suxiang Tong; Yan Li; Ying Tao                                                                                                                                                                                                                                                                                                                                                                            |
| EPI_ISL_875568                                                                                                                                                                                                                                                                                                                                                                                                                                                                                                                                                                                                                                                                                                                                                                                                 | SIESP L'AQUILA                                                                                                                                                                             | Istituto Zooprofilattico Sperimentale dell'Abruzzo e Molise "G. Caporale"                                                                                                                                     | Ancora M; Calistri P; Cammà C; Curini V; Di Domenico M; Di Pasquale A; Lorusso A; Mangone I; Marcacci M; Puglia I; Rinaldi A; Savini G; Sialabba S                                                                                                                                                                                                                                                                                                                                                                                                                                                                                                  |
| EPI_ISL_891152, EPI_ISL_891219                                                                                                                                                                                                                                                                                                                                                                                                                                                                                                                                                                                                                                                                                                                                                                                 | SMS Medical College Jaipur                                                                                                                                                                 | SMS Medical College Jaipur                                                                                                                                                                                    | Bharti Malhotra; Himanshu Sharma; Neha Bhomia; Nivedita Gupta; Pragya Yadav; Pratibha Sharma; Swati Gautam; Varsha Potdar                                                                                                                                                                                                                                                                                                                                                                                                                                                                                                                           |
| EPI_ISL_891211                                                                                                                                                                                                                                                                                                                                                                                                                                                                                                                                                                                                                                                                                                                                                                                                 | SMS Medical College Jaipur                                                                                                                                                                 | SMS Medical College Jaipur                                                                                                                                                                                    | Bharti Malhotra; Himanshu Sharma; Neha Bhomia; Nivedita Gupta; Pragya Yadav; Pratibha Sharma; Swati Gautam; Varsha Potdar                                                                                                                                                                                                                                                                                                                                                                                                                                                                                                                           |
| EPI_ISL_845627                                                                                                                                                                                                                                                                                                                                                                                                                                                                                                                                                                                                                                                                                                                                                                                                 | SYNLAB COLOMBIA S.A.S                                                                                                                                                                      | Instituto Nacional de Salud - Dirección de Investigación en Salud Pública                                                                                                                                     | Carlos Franco-Muñoz; Diego A. Álvarez-Díaz; Diego Andrés Prada; Gerardo Santamaría; Jonathan Reales; Julian Naizaque; Katherine Laiton-Donato; Magdalena Wiesner; Marcela Mercado-Reyes; María T. Herrera-Sepúlveda; Martha Lucía Ospina Martínez; Mauricio Pacheco-Montealegre; Paola Muñoz-Laiton; Sheryll Corchuelo                                                                                                                                                                                                                                                                                                                              |
| EPI_ISL_898053                                                                                                                                                                                                                                                                                                                                                                                                                                                                                                                                                                                                                                                                                                                                                                                                 | Sakai City Institute of Public Health                                                                                                                                                      | Pathogen Genomics Center, National Institute of Infectious Diseases                                                                                                                                           | Kentaro Itokawa; Makoto Kuroda; Masanori Hashino; Rina Tanaka; Tsuyoshi Sekizuka                                                                                                                                                                                                                                                                                                                                                                                                                                                                                                                                                                    |
| EPI_ISL_494384, EPI_ISL_635434, EPI_ISL_667032, EPI_ISL_730093, EPI_ISL_878390                                                                                                                                                                                                                                                                                                                                                                                                                                                                                                                                                                                                                                                                                                                                 | San Diego County Public Health Laboratory                                                                                                                                                  | Andersen lab at Scripps Research                                                                                                                                                                              | Brett Austin; Jovan Shephard; SEARCH Alliance San Diego with Tracy Basler                                                                                                                                                                                                                                                                                                                                                                                                                                                                                                                                                                           |
| EPI_ISL_749036, EPI_ISL_749151, EPI_ISL_749155, EPI_ISL_750162, EPI_ISL_750170, EPI_ISL_750171, EPI_ISL_750178                                                                                                                                                                                                                                                                                                                                                                                                                                                                                                                                                                                                                                                                                                 | Sanatorio Americano                                                                                                                                                                        | Institut Pasteur de Montevideo                                                                                                                                                                                | Ana Carolina Mendonça; Andres Lizasoain; Camila Simoes; Cecilia Alonso; Cecilia Salazar; Daiana Mir; Fernando Lopez-Tort; Fernando Motta; Gonzalo Bello; Ighor Arantes; Ignacio Ferrés; Jose Sotelo; Leticia Maya; Leticia Garay Martins; Luciana Appolinario; Lucia Spangenberg; Mailen Arleo; Mariana Brandes; Marilda Mendonça Siqueira; Marilda Tereza Mar da Rosa; Maria Jose Benitez-Galeano; Martin Graña; Matias Castells; Matias Victoria; Matias Salvo; Natalia Rego; Natalia Reyes; Pablo Smircich; Paola Cristina Resende; Rodney Colina; Tamara Fernandez-Calero; Tania Possi; Tatiana Schäffer Gregianini; Veronica Noya; Yasser Vega |
| EPI_ISL_547580                                                                                                                                                                                                                                                                                                                                                                                                                                                                                                                                                                                                                                                                                                                                                                                                 | Santa Casa da Misericórdia de Presidente Prudente                                                                                                                                          | Instituto Adolfo Lutz, Interdisciplinary Procedures Center, Strategic Laboratory                                                                                                                              | Claudia Regina Gonçalves; Cláudio Tavares Sacchi; Erica Valessa Ramos Gomes; Karoline Rodrigues Campos                                                                                                                                                                                                                                                                                                                                                                                                                                                                                                                                              |
| EPI_ISL_672108, EPI_ISL_884989                                                                                                                                                                                                                                                                                                                                                                                                                                                                                                                                                                                                                                                                                                                                                                                 | Santa Clara County Public Health Laboratory                                                                                                                                                | Chan-Zuckerberg Biohub                                                                                                                                                                                        | CZB Cllahub Consortium                                                                                                                                                                                                                                                                                                                                                                                                                                                                                                                                                                                                                              |
| EPI_ISL_528749                                                                                                                                                                                                                                                                                                                                                                                                                                                                                                                                                                                                                                                                                                                                                                                                 | Santosa Hospital Bandung Central                                                                                                                                                           | School of Life Sciences and Technology & School of Pharmacy-Institut Teknologi Bandung; Molecular Genetics Laboratory-Faculty of Medicine-Universitas Padjadjaran; Laboratorium Kesehatan Provinsi Jawa Barat | Agung Eru Wibowo; Azzania Fibriani; Catur Riani; Cut Nur Cinthia Alamanda; Davin H. E. Setiamarga; Ema Rahmawati; Hammam Riza; Hesti Lina Wiraswati; Husna Nugrahapraja; Irvan Faizal; Lia Faridah; Marselina Irasonia Tan; Rifky Waluyajati Rachman; Rizki Mardian; Ryan Bayusantika Ristandi; Savira Ekawardhani; Sony Solistia Wirawan; Tarwadi; Yunia Sribudiani                                                                                                                                                                                                                                                                                |
| EPI_ISL_1009123, EPI_ISL_1009128                                                                                                                                                                                                                                                                                                                                                                                                                                                                                                                                                                                                                                                                                                                                                                               | School of Pharmacy                                                                                                                                                                         | School of Pharmacy                                                                                                                                                                                            | Ahmed Kandel; Ghazi Kayali; Mina Nabil Kamel; Mohamed A Ali; Rabeh El-Shesheny; Walid Abi Habib                                                                                                                                                                                                                                                                                                                                                                                                                                                                                                                                                     |
| EPI_ISL_661183, EPI_ISL_676576, EPI_ISL_676583, EPI_ISL_904004, EPI_ISL_904006                                                                                                                                                                                                                                                                                                                                                                                                                                                                                                                                                                                                                                                                                                                                 | Scientific Veterinary Institute Novi Sad                                                                                                                                                   | Veterinary Specialized Institute "Kraljevo", Serbia                                                                                                                                                           | Afonso, C.; Banovic Djeri, B.; Jankovic, M.; Jovanovic, T.; Knezevic, A.; Petrovic, T.; Sekler, M.; Tesovic, B.; Vidanovic, D.; Volkening, J.                                                                                                                                                                                                                                                                                                                                                                                                                                                                                                       |
| EPI_ISL_596430, EPI_ISL_890184, EPI_ISL_1049534, EPI_ISL_1114171                                                                                                                                                                                                                                                                                                                                                                                                                                                                                                                                                                                                                                                                                                                                               | Seattle Flu Study                                                                                                                                                                          | Seattle Flu Study                                                                                                                                                                                             | Amanda Adler; Barry R. Lutz; Benjamin Pelle; Caitlin R. Wolf; Chris D. Frazier; Deborah A. Nickerson; Elisabeth Brandstetter; Erica Ryke; Helen Y. Chu; Janet A. Englund; Jay Shendure; Jeff Duchin; Jover Lee; Kairsten Fay; Karen Cowgill; Kirsten Lacombe; Lea M. Starita; Mark J. Rieder; Matthew Richardson; Matthew Thompson; Melissa Tuong; Michael Boeckh; Michael Famulare; Misja Ilcin; Peter D. Han; Stephanie Schrag; Thomas R. Sibley; Trevor Bedford                                                                                                                                                                                  |
| EPI_ISL_778843, EPI_ISL_849284, EPI_ISL_849291, EPI_ISL_849318, EPI_ISL_849350, EPI_ISL_849353, EPI_ISL_849380, EPI_ISL_856756, EPI_ISL_856757, EPI_ISL_856758, EPI_ISL_856759, EPI_ISL_856760, EPI_ISL_856761, EPI_ISL_856762, EPI_ISL_856763, EPI_ISL_856764, EPI_ISL_856765, EPI_ISL_856766, EPI_ISL_856767, EPI_ISL_856768, EPI_ISL_856769, EPI_ISL_856770, EPI_ISL_856771, EPI_ISL_856772, EPI_ISL_856773, EPI_ISL_856774, EPI_ISL_856775, EPI_ISL_856776, EPI_ISL_856777, EPI_ISL_856778, EPI_ISL_856779, EPI_ISL_856780, EPI_ISL_856781, EPI_ISL_856782, EPI_ISL_856783, EPI_ISL_856784, EPI_ISL_856785, EPI_ISL_856786, EPI_ISL_856787, EPI_ISL_856788, EPI_ISL_856789, EPI_ISL_856794, EPI_ISL_856795, EPI_ISL_856796, EPI_ISL_856797, EPI_ISL_856798, EPI_ISL_856799, EPI_ISL_856800, EPI_ISL_856801 | Instituto Nacional Enfermedades Infecciosas C.G.Malbran                                                                                                                                    | Avaro M.; Baumeister E.; Benedetti E.; Campos J.; Cisterna D.; Dattero ME; Lorenzo F.; Molina V.; Perandones C.; Poklepovich T.; Pontoriero A.; Russo M.; Tuduri E.                                           |                                                                                                                                                                                                                                                                                                                                                                                                                                                                                                                                                                                                                                                     |
| see above                                                                                                                                                                                                                                                                                                                                                                                                                                                                                                                                                                                                                                                                                                                                                                                                      | Servicio Virosis Respiratorias-Departamento Virologia-INEI                                                                                                                                 |                                                                                                                                                                                                               |                                                                                                                                                                                                                                                                                                                                                                                                                                                                                                                                                                                                                                                     |
| EPI_ISL_1007853                                                                                                                                                                                                                                                                                                                                                                                                                                                                                                                                                                                                                                                                                                                                                                                                | Servicio de Microbiología, Hospital Universitario Central de Asturias                                                                                                                      | SeqCOVID-SPAIN consortium/IBV(CSIC)                                                                                                                                                                           | Cristián Castelló Abietar; Jose A. Boga; Marta Elena Álvarez-Argüelles; Santiago Melón and SeqCOVID-SPAIN consortium; Susana Rojo-Alba                                                                                                                                                                                                                                                                                                                                                                                                                                                                                                              |
| EPI_ISL_779876, EPI_ISL_819193, EPI_ISL_1056628                                                                                                                                                                                                                                                                                                                                                                                                                                                                                                                                                                                                                                                                                                                                                                | Servicio de Microbiología, Hospital Universitario Son Espases                                                                                                                              | SeqCOVID-SPAIN consortium/IBV(CSIC)                                                                                                                                                                           | Antonio Oliver and SeqCOVID-SPAIN consortium; Carla López-Causapé; Jordi Reina                                                                                                                                                                                                                                                                                                                                                                                                                                                                                                                                                                      |
| EPI_ISL_654531, EPI_ISL_683613                                                                                                                                                                                                                                                                                                                                                                                                                                                                                                                                                                                                                                                                                                                                                                                 | Servicio de Microbiología, Laboratori Clínic Metropolitana Nord, Hospital Universitari Germans Trias i Pujol, Institut d'Investigació en Ciències de la Salut Germans Trias i Pujol (IGTP) | SeqCOVID-SPAIN consortium/IBV(CSIC)                                                                                                                                                                           | Adrián Antuori; Anabel Fernández; Anna Not; Antoni E. Bordoy; Cristina Casañ and SeqCOVID-SPAIN consortium; Elisa Martró; Nona Romani; Nona Romani and SeqCOVID-SPAIN consortium; Verónica Saludes                                                                                                                                                                                                                                                                                                                                                                                                                                                  |
| EPI_ISL_1060513                                                                                                                                                                                                                                                                                                                                                                                                                                                                                                                                                                                                                                                                                                                                                                                                | Servicio de Microbiología, Hospital Clínico Universitario de Valencia                                                                                                                      | SeqCOVID-SPAIN consortium/IBV(CSIC)                                                                                                                                                                           | David Navarro Ortega; Eliseo Albert Vicent; Ignacio Torres and SeqCOVID-SPAIN consortium                                                                                                                                                                                                                                                                                                                                                                                                                                                                                                                                                            |
| EPI_ISL_538655                                                                                                                                                                                                                                                                                                                                                                                                                                                                                                                                                                                                                                                                                                                                                                                                 | Servicio de Microbiología, Hospital General Universitario de Castellón                                                                                                                     | SeqCOVID-SPAIN consortium/IBV(CSIC)                                                                                                                                                                           | María Dolores Tirado and SeqCOVID-SPAIN consortium; Rosario Moreno                                                                                                                                                                                                                                                                                                                                                                                                                                                                                                                                                                                  |
| EPI_ISL_1014744                                                                                                                                                                                                                                                                                                                                                                                                                                                                                                                                                                                                                                                                                                                                                                                                | Servicio de Microbiología, Hospital Ramón y Cajal. (CIBERESP)                                                                                                                              | SeqCOVID-SPAIN consortium/IBV(CSIC)                                                                                                                                                                           | Jose Mª González-Alba; Juan C Galán and SeqCOVID-SPAIN consortium; L. Olavarrieta; Val Fernández                                                                                                                                                                                                                                                                                                                                                                                                                                                                                                                                                    |
| EPI_ISL_710554                                                                                                                                                                                                                                                                                                                                                                                                                                                                                                                                                                                                                                                                                                                                                                                                 | Sestre Milosrdnice University Hospital Center                                                                                                                                              | Ruer Boškovic Institute; Forensic Science Centre Ivan Vueti; University of Zagreb Faculty of Science                                                                                                          | Ana Livun; Antonela Blažekovi; Boris Maek; Danilo Licastro; Dunja Glavaš; Fran Boroveki; Gordana Maravi Vlahovjek; Ivan Šamija; Ivana elap; Josipa Škelin; Kristian Vlahovjek; Kristina Gotovac Jerel; Lidija Cvetko-Krajinovi; Lucija Markulin; Maja Kuzman; Marina Korolija; Mario Štefanovi; Mirjana Domazet-Lošo; Paula Stanci; Robert Beluži; Rosa Karli; Sanja Tadinac; Tomislav Domazet-Lošo; Vjekoslav Toma; Vladimir Krajinovi; Željka Maak Šafranko                                                                                                                                                                                       |
| EPI_ISL_962662                                                                                                                                                                                                                                                                                                                                                                                                                                                                                                                                                                                                                                                                                                                                                                                                 | Sharp HealthCare Laboratory                                                                                                                                                                | Andersen lab at Scripps Research                                                                                                                                                                              | Art Mendoza; Cathy Woerle; Jacquelyn Berumen; Liam McGinnis; Omid Bakhtar; SEARCH Alliance San Diego with Aaron Harding                                                                                                                                                                                                                                                                                                                                                                                                                                                                                                                             |
| EPI_ISL_582125                                                                                                                                                                                                                                                                                                                                                                                                                                                                                                                                                                                                                                                                                                                                                                                                 | Sheikh Khalifa Medical City                                                                                                                                                                | Molecular Surveillance lab Sheikh Khalifa Medical City                                                                                                                                                        | Amirtharaj Francis; Hala Imambaccus; Hiba Saud; Sahar Almarzooqi; Sajeed Abdul; Stefan Weber                                                                                                                                                                                                                                                                                                                                                                                                                                                                                                                                                        |
| EPI_ISL_582608, EPI_ISL_582627, EPI_ISL_582645, EPI_ISL_582684                                                                                                                                                                                                                                                                                                                                                                                                                                                                                                                                                                                                                                                                                                                                                 | Sheikh Khalifa Medical City                                                                                                                                                                | Molecular/Surveillance lab Sheikh Khalifa Medical City                                                                                                                                                        | Amirtharaj Francis; Hala Imambaccus; Hiba Saud; Sahar Almarzooqi; Sajeed Abdul; Stefan Weber                                                                                                                                                                                                                                                                                                                                                                                                                                                                                                                                                        |
| EPI_ISL_906091                                                                                                                                                                                                                                                                                                                                                                                                                                                                                                                                                                                                                                                                                                                                                                                                 | Shimantik Pathology and Diagnostic Center                                                                                                                                                  | Child Health Research Foundation                                                                                                                                                                              | Afroza Akter Tanni; Arif Mohammad Tanmoy; Md. Mobarok Karim; Md. Parvej Alam; Roly Malaker Md Hafizur Rahman; Samir K Saha; Senjuti Saha; Sharmistha Goswami; Syed Mukhtadir Al Sium                                                                                                                                                                                                                                                                                                                                                                                                                                                                |
| EPI_ISL_509389, EPI_ISL_518011, EPI_ISL_891252                                                                                                                                                                                                                                                                                                                                                                                                                                                                                                                                                                                                                                                                                                                                                                 | Singapore General Hospital                                                                                                                                                                 | Department of Microbiology                                                                                                                                                                                    | Chenhao Li; Chenhao Li; Karrie Ko; Karrie Ko; Kenneth Xin Long Chan; Kern Rei Chng; Kern Rei Chng; Kian Sing Chan; Kian Sing Chan; Kun Lee Lim; Kun Lee Lim; Lynette Oon; Lynette Oon; Niranjana Nagarajan; Niranjana Nagarajan; Nurdyana Abdul Rahman; Nurdyana Abdul Rahman; Sui Sin Goh                                                                                                                                                                                                                                                                                                                                                          |
| EPI_ISL_406973                                                                                                                                                                                                                                                                                                                                                                                                                                                                                                                                                                                                                                                                                                                                                                                                 | Singapore General Hospital                                                                                                                                                                 | National Public Health Laboratory                                                                                                                                                                             | Chavatte JM; Cui; L; Lin; Mak; Octavia S; RTP; TM; ZY; Zhou                                                                                                                                                                                                                                                                                                                                                                                                                                                                                                                                                                                         |
| EPI_ISL_407987                                                                                                                                                                                                                                                                                                                                                                                                                                                                                                                                                                                                                                                                                                                                                                                                 | Singapore General Hospital                                                                                                                                                                 | Programme in Emerging Infectious Diseases, Duke-NUS Medical School                                                                                                                                            | Danielle E Anderson; Gavin JD Smith; Jayanthi Jayakumar; Jenny GH Low; Kian Sing Chan; Linfa Wang; Lynette LE Oon; Martin Linster; Yan Zhuang; Yvonne CF Su                                                                                                                                                                                                                                                                                                                                                                                                                                                                                         |
| EPI_ISL_956315                                                                                                                                                                                                                                                                                                                                                                                                                                                                                                                                                                                                                                                                                                                                                                                                 | Siti Khodijah Hospital                                                                                                                                                                     | Institute of Tropical Disease, Universitas Airlangga                                                                                                                                                          | Aldise M Nastri; Gatot Soegiarto; Jezzy R Dewantari; Kazufumi Shimizu; Krisnoadi Rahardjo; Laksmi Wulandari; Maria I Lusida; Muhammad Hamdan; Resti Yudhawati; Rima R Prasetya; Soetijpto; Yasuko Mori                                                                                                                                                                                                                                                                                                                                                                                                                                              |
| EPI_ISL_801528                                                                                                                                                                                                                                                                                                                                                                                                                                                                                                                                                                                                                                                                                                                                                                                                 | Sonic Reference Laboratory                                                                                                                                                                 | Pathogen Discovery, Respiratory Viruses Branch, Division of                                                                                                                                                   | Anna Uehara; Clinton R. Paden; Haibin Wang; Jing Zhang; Krista Queen; Peter Cook; Suxiang Tong; Yan Li; Ying Tao                                                                                                                                                                                                                                                                                                                                                                                                                                                                                                                                    |

|                                                                                                                                                                                                                                                                                 |                                                                                                                                          |                                                                                                                            |                                                                                                                                                                                                                                                                                                                                                                                                                                                                                                                                                                                                                                                                                                              |
|---------------------------------------------------------------------------------------------------------------------------------------------------------------------------------------------------------------------------------------------------------------------------------|------------------------------------------------------------------------------------------------------------------------------------------|----------------------------------------------------------------------------------------------------------------------------|--------------------------------------------------------------------------------------------------------------------------------------------------------------------------------------------------------------------------------------------------------------------------------------------------------------------------------------------------------------------------------------------------------------------------------------------------------------------------------------------------------------------------------------------------------------------------------------------------------------------------------------------------------------------------------------------------------------|
|                                                                                                                                                                                                                                                                                 |                                                                                                                                          | Viral Diseases, Centers for Disease Control and Prevention                                                                 |                                                                                                                                                                                                                                                                                                                                                                                                                                                                                                                                                                                                                                                                                                              |
| EPI_ISL_981991, EPI_ISL_1113669, EPI_ISL_1113699                                                                                                                                                                                                                                | Sonora Quest Laboratories                                                                                                                | TGen North                                                                                                                 | "Jolene Bowers; Ashlyn Pfeiffer; Chris French; Darrin Lemmer; Dave Engelthaler; Hayley Yaglom; Megan Folkerts; The Arizona COVID Genomics Union (ACGU)"                                                                                                                                                                                                                                                                                                                                                                                                                                                                                                                                                      |
| EPI_ISL_1016989, EPI_ISL_1016994, EPI_ISL_1017022, EPI_ISL_1017039                                                                                                                                                                                                              | South Dakota Public Health Laboratory                                                                                                    | University of Minnesota Genomics Center                                                                                    | Benjamin Auch; Corbin Dirx; Daryl M. Gohl; Jaquelyn Kuriger-Laber; John Garbe; and Chris Carlson                                                                                                                                                                                                                                                                                                                                                                                                                                                                                                                                                                                                             |
| EPI_ISL_455090                                                                                                                                                                                                                                                                  | South Eastern Area Laboratory Services                                                                                                   | NSW Health Pathology - Institute of Clinical Pathology and Medical Research; Westmead Hospital; University of Sydney       | CIDM-PH et al.                                                                                                                                                                                                                                                                                                                                                                                                                                                                                                                                                                                                                                                                                               |
| EPI_ISL_710122                                                                                                                                                                                                                                                                  | South Eastern Area Laboratory Services (SEALS)                                                                                           | CIDM-PH et al.                                                                                                             | CIDM-PH et al.                                                                                                                                                                                                                                                                                                                                                                                                                                                                                                                                                                                                                                                                                               |
| EPI_ISL_478709, EPI_ISL_478710, EPI_ISL_490022, EPI_ISL_593696, EPI_ISL_593700, EPI_ISL_667781, EPI_ISL_667788, EPI_ISL_667790, EPI_ISL_667793, EPI_ISL_667794, EPI_ISL_667795, EPI_ISL_672659, EPI_ISL_672661, EPI_ISL_806722, EPI_ISL_845784, EPI_ISL_845789, EPI_ISL_1098651 | South Eastern Area Laboratory Services (SEALS)                                                                                           | NSW Health Pathology - Institute of Clinical Pathology and Medical Research; Westmead Hospital; University of Sydney       | CIDM-PH et al.                                                                                                                                                                                                                                                                                                                                                                                                                                                                                                                                                                                                                                                                                               |
| see above                                                                                                                                                                                                                                                                       | South Eastern Area Laboratory Services (SEALS)                                                                                           | NSW Health Pathology - Institute of Clinical Pathology and Medical Research; Westmead Hospital; University of Sydney       | CIDM-PH et al.                                                                                                                                                                                                                                                                                                                                                                                                                                                                                                                                                                                                                                                                                               |
| EPI_ISL_456238, EPI_ISL_579148, EPI_ISL_579161, EPI_ISL_579163, EPI_ISL_579182                                                                                                                                                                                                  | Southern Community Labs Dunedin                                                                                                          | Institute of Environmental Science and Research (ESR)                                                                      | Anja Werno; Antje van der Linden; Arlo Upton; Chris Mansell; David Hammer; Dragana Drinkovic; Erasmus Smit; Gary McAuliffe; Hana Sofia Andersson; Hermes Perez; James Ussher; Jill Sherwood; Jing Wang; Joep de Ligt; Josh Freeman; Julia Howard; Juliet Elvy; Lauren Jelly; Mary DeAlmeida; Matt Blakiston; Matt Storey; Matthew Rogers; Max Bloomfield; Michael Addle; Michelle Balm; Muhammad Faisal; Nikki Freed; Olin Silander; Sally Roberts; Sarah Jefferies; Sharmini Muttaiyah; Susan Morpeth; Susan Taylor; Timothy Blackmore; Vani Sathyendran; Veronica Playle; Virginia Hope; Xiaoyun Ren                                                                                                       |
| EPI_ISL_1122455                                                                                                                                                                                                                                                                 | Southern Philippines Medical Center                                                                                                      | Philippine Genome Center                                                                                                   | Alethea R. de Guzman; Anna Ong-Lim; Arienne A. Zamora; Asia Louisa U. Chong; Benedict A. Maralit; Candice Francheska B. Tambaoan; Carlo M. Lapid; Celia Carlos; Devon Ray Pacial; Edsel Maurice Salvaña; El King D. Morado; Eva María Cutiongo-de la Paz; Francis A. Tablizo; Irish Coleen A. Asin; Jaime C. Montoya; Jan Michael C. Yap; Jo-Hannah S. Llamas; John Q. Wong; Joshua Gregor A. Dizon; Juan Antonio R. Magalang; Karol Sophia Agape R. Padilla; Kenneth M. Kim; Kris P. Punayan; Marc Edsel C. Ayes; Marc Jerrone R. Castro; Maria Rosario Singh-Vergeire and Cynthia P. Saloma; Maria Sofia L. Yangzon; Marissa Alejandria; Razel Nikka M. Hao; Rianna Patricia S. Cruz; Sheila Mae M. Araiza |
| EPI_ISL_849738, EPI_ISL_849739, EPI_ISL_849741, EPI_ISL_849743                                                                                                                                                                                                                  | Special Operations Medical Research Division, Defence Services Medical Research Centre                                                   | Special Operations Medical Research Division, Defence Services Medical Research Centre                                     | Aung; Htun; K.K.; K.Z.; Lwin; Myint, K.; N.M.; Oo; P.K.; Win; Z.W.; Zaw, T.                                                                                                                                                                                                                                                                                                                                                                                                                                                                                                                                                                                                                                  |
| EPI_ISL_754109                                                                                                                                                                                                                                                                  | Specialized Lab for COVID-19 Detection, Department of Genetic Engineering and Biotechnology                                              | Specialized Lab for COVID-19 Detection, Department of Genetic Engineering and Biotechnology                                | Hammadul Hoque; Md. Mashuur Rahaman; Md. Mosarof Hossen; Md. Nazmul Hasan; Nurnabi Azad Jewel; Shamsul H. Prohnan                                                                                                                                                                                                                                                                                                                                                                                                                                                                                                                                                                                            |
| EPI_ISL_882957                                                                                                                                                                                                                                                                  | Specjalistyczny Szpital im. Dra A. Sokoowskiego                                                                                          | National Institute of Public Health - National Institute of Hygiene                                                        | Gawor Jan; Wokowicz Tomasz; Zacharczuk Katarzyna                                                                                                                                                                                                                                                                                                                                                                                                                                                                                                                                                                                                                                                             |
| EPI_ISL_544999                                                                                                                                                                                                                                                                  | St Vincent's Pathology (SydPath)                                                                                                         | NSW Health Pathology - Institute of Clinical Pathology and Medical Research; Westmead Hospital; University of Sydney       | CIDM-PH et al.                                                                                                                                                                                                                                                                                                                                                                                                                                                                                                                                                                                                                                                                                               |
| EPI_ISL_752996, EPI_ISL_753129, EPI_ISL_967605                                                                                                                                                                                                                                  | State Laboratories Division, Hawaii State Department of Health                                                                           | State Laboratories Division, Hawaii State Department of Health                                                             | Ayana Garnet; Drew Kuwazaki; Edward Desmond; Pamela O'Brien; Razvan Sultana; Sabrina Diemert                                                                                                                                                                                                                                                                                                                                                                                                                                                                                                                                                                                                                 |
| EPI_ISL_428901, EPI_ISL_428906                                                                                                                                                                                                                                                  | State Research Center of Virology and Biotechnology VECTOR, Department of Collection of Microorganisms                                   | State Research Center of Virology and Biotechnology VECTOR, Department of Collection of Microorganisms                     | Alexander N. Shvalov; Elena V. Gavrilova; Oleg V. Pyankov; Rinat A. Maksyutov; Sergey A. Bodnev; Tatyana V. Tregubchak                                                                                                                                                                                                                                                                                                                                                                                                                                                                                                                                                                                       |
| EPI_ISL_826274                                                                                                                                                                                                                                                                  | Sterling Hospital, Memnagar, Ahmedabad                                                                                                   | Gujarat Biotechnology Research Centre                                                                                      | Afzal Ansari; Apurvashin Puvar; Atul K Patel; Chaitanya Joshi; Dinesh Kumar; Janvi Ravat; Labdhi Pandya; Madhvi Joshi; Naman Shashtri; Nikha Trivedi; Nitin Savaliya; Ramesh Pandit; Zama Patel; Zuber Saiyed                                                                                                                                                                                                                                                                                                                                                                                                                                                                                                |
| EPI_ISL_491053                                                                                                                                                                                                                                                                  | Suceava County Emergency Hospital                                                                                                        | "Stefan cel Mare" University Metagenomics Lab                                                                              | Lobiuc Andrei et al.                                                                                                                                                                                                                                                                                                                                                                                                                                                                                                                                                                                                                                                                                         |
| EPI_ISL_648158                                                                                                                                                                                                                                                                  | Sundsvall                                                                                                                                | The Public Health Agency of Sweden                                                                                         | Anna Risberg; Anna-Malin Linde; Karin Tegmark-Wisell; Maria Lind Karlberg; Mattias Haukland; Mia Brytting; Olov Svartstrom; Oskar Karlsson Lindsjö; Petra Edquist; Reza Advani; Sandra Brodsson                                                                                                                                                                                                                                                                                                                                                                                                                                                                                                              |
| EPI_ISL_450747                                                                                                                                                                                                                                                                  | Sunnybrook Health Sciences Centre                                                                                                        | Department of Laboratory Medicine and Molecular Diagnostics, Sunnybrook Health Sciences Centre                             | Amogelang R. Raphenya; Andrew G. McArthur; Arinjay Banerjee; Bo Wang; Brian P. Alcock; Finlay Maguire; Hamza Mbareche; Hassaan Maan; Jalees A. Nasir; Julian A. Hiscox; Karen Mossman; Kendrick M. Smith; Muhammad Alruwaili; Natalie C. Knox; Patryk Aftanas; Robert A. Kozak; Samira Mubareka                                                                                                                                                                                                                                                                                                                                                                                                              |
| EPI_ISL_1040647                                                                                                                                                                                                                                                                 | Swellendam PHC                                                                                                                           | NHLS/UCT                                                                                                                   | Arash Irzadeh; Bruna Galvao; Carolyn Williamson; Deelan Doolabh; Diana Hardie; Innocent Mudau; Kruger Marais; Lynn Tyers; Marvin Hsiao; Stephen Korsman                                                                                                                                                                                                                                                                                                                                                                                                                                                                                                                                                      |
| EPI_ISL_526197, EPI_ISL_591513, EPI_ISL_767911, EPI_ISL_767913                                                                                                                                                                                                                  | Sydney South West Pathology Service (SSWPS) - Liverpool Hospital - NSW Health Pathology                                                  | NSW Health Pathology - Institute of Clinical Pathology and Medical Research; Westmead Hospital; University of Sydney       | CIDM-PH et al.                                                                                                                                                                                                                                                                                                                                                                                                                                                                                                                                                                                                                                                                                               |
| EPI_ISL_545041, EPI_ISL_767853, EPI_ISL_767859, EPI_ISL_767864, EPI_ISL_767865, EPI_ISL_803113, EPI_ISL_803114, EPI_ISL_806729, EPI_ISL_845798                                                                                                                                  | Sydney South West Pathology Service (SSWPS) - Royal Prince Alfred Hospital - NSW Health Pathology                                        | NSW Health Pathology - Institute of Clinical Pathology and Medical Research; Westmead Hospital; University of Sydney       | CIDM-PH et al.                                                                                                                                                                                                                                                                                                                                                                                                                                                                                                                                                                                                                                                                                               |
| see above                                                                                                                                                                                                                                                                       | Sydney South West Pathology Service (SSWPS) - Royal Prince Alfred Hospital - NSW Health Pathology                                        | NSW Health Pathology - Institute of Clinical Pathology and Medical Research; Westmead Hospital; University of Sydney       | CIDM-PH et al.                                                                                                                                                                                                                                                                                                                                                                                                                                                                                                                                                                                                                                                                                               |
| EPI_ISL_768522                                                                                                                                                                                                                                                                  | Synphaet Hospital                                                                                                                        | National Institute of Health, Department of Medical Sciences, Ministry of Public Health, Thailand                          | ; Natchaya Khiahsang; Pakorn Piromtong; Pilaiuk Okada; Ratana Tacharoenmuang; Siripaporn Phuygun; Sittiporn Parmmen; Sunthareeya Waicharoen; Thanutsapa Thanadachakul; Warawan Wongboot; sirinkanda wimol                                                                                                                                                                                                                                                                                                                                                                                                                                                                                                    |
| EPI_ISL_914796, EPI_ISL_914797, EPI_ISL_914824, EPI_ISL_1067595, EPI_ISL_1067600                                                                                                                                                                                                | TAMAJAZE COMUNITARIO - PASO CANOAS                                                                                                       | Incienza, Instituto Costarricense de Investigación y Enseñanza en Nutrición y Salud                                        | Adriana Godínez; Claudio Soto-Garita; Estela Cordero; Francisco Duarte; Hebleen Porras; Melany Calderón & Mariel López; Melany Calderón & Mónica Charpentier-Artavia                                                                                                                                                                                                                                                                                                                                                                                                                                                                                                                                         |
| EPI_ISL_1036555                                                                                                                                                                                                                                                                 | TGen North                                                                                                                               | TGen North                                                                                                                 | "Jolene Bowers; Ashlyn Pfeiffer; Chris French; Darrin Lemmer; Dave Engelthaler; Hayley Yaglom; Megan Folkerts; The Arizona COVID Genomics Union (ACGU)"                                                                                                                                                                                                                                                                                                                                                                                                                                                                                                                                                      |
| EPI_ISL_903582                                                                                                                                                                                                                                                                  | TN Division of Laboratory Services                                                                                                       | Genomics and Discovery, Respiratory Viruses Branch, Division of Viral Diseases, Centers for Disease Control and Prevention | Anna Montmayeur; Anna Uehara; Ben L. Rambo-Martin; Clinton R. Paden; Dhvani Batra; Haibin Wang; Jasmine Padilla; Jing Zhang; Justin Lee; Krista Queen; Lori Rowe; Mark Burroughs; Mili Sheth; Peter W. Cook; Rachel Marine; Sarah Nobles; Suxiang Tong; Yan Li; Ying Tao                                                                                                                                                                                                                                                                                                                                                                                                                                     |
| EPI_ISL_812204, EPI_ISL_876593, EPI_ISL_876595                                                                                                                                                                                                                                  | TN Division of Laboratory Services                                                                                                       | Pathogen Discovery, Respiratory Viruses Branch, Division of Viral Diseases, Centers for Disease Control and Prevention     | Anna Montmayeur; Anna Uehara; Brian Lynch; Clinton R. Paden; Haibin Wang; Jing Zhang; Krista Queen; Peter Cook; Rachel Marine; Suxiang Tong; Yan Li; Ying Tao                                                                                                                                                                                                                                                                                                                                                                                                                                                                                                                                                |
| EPI_ISL_436100, EPI_ISL_457730                                                                                                                                                                                                                                                  | TSGH-CP molecular lab                                                                                                                    | TSGH-CP molecular lab                                                                                                      | Cheng-Lih Perng; Chien-Wen Chen; Chih-Kai Chang; Feng-Yee Chang; Hsing-Yi Chung; Hung-Sheng Shang; Jung-Chung Lin; Kuo-Ming Yeh; Kuo-Sheng Hung; Ming-Jr JAN; Ming-Jr Jian; Sheng-Kang Chiu; Shih-Hung Tsai; Tien-Yao Chang                                                                                                                                                                                                                                                                                                                                                                                                                                                                                  |
| EPI_ISL_902919, EPI_ISL_911675, EPI_ISL_911750                                                                                                                                                                                                                                  | Tanjungpura University Hospital                                                                                                          | Tanjungpura University Hospital                                                                                            | Ambar Rialita; Andriani; Arif Wicaksono; Delima Fajar Liana; Eka Ardiani Putri; Eka Ardiani Putri EA; Helmi Sastrawan; Mahyarudin; Muhammad Ibnu Kahtan; Muhammad Kahtan; Puji Astuti; Puji Astuti P; Rini Andriani; Sofi Siti Shofiyah; Virhan Novianry; Wiwik Windarti                                                                                                                                                                                                                                                                                                                                                                                                                                     |
| EPI_ISL_966940                                                                                                                                                                                                                                                                  | Technical Support Units for Scientific Research (UATRS), National Centre for Scientific and Technical Research (CNRST)                   | Technical Support Units for Scientific Research (UATRS), National Centre for Scientific and Technical Research (CNRST)     | Alaoui; Elalaoui; Elannaz, H.; Elouanass, M.; Ennibi, H. and El Fahime, E.; Hemlali, M.; Lahlou, M.A.; Melloul, M.; Rfaki, A.; S.A.; Touil, N.; a.l.                                                                                                                                                                                                                                                                                                                                                                                                                                                                                                                                                         |
| EPI_ISL_937537                                                                                                                                                                                                                                                                  | Thai Red Cross Emerging Infectious Diseases Health Science Centre, Chulalongkorn Hospital, Faculty of Medicine, Chulalongkorn University | Thai Red Cross Emerging Infectious Diseases Center and Faculty of Medicine, Chulalongkorn University                       | Apaporn Rodpan; Gompol Suwanpimolkul; Leilani Paitoonpong; Opass Putcharoen; Pattama Torvorapanit; Sininat Petcharat; Sopon Iamsirithaworn; Supaporn Wacharapluasadee; Thiravat Hemachudha; Watsamon Jantarabenjakul; Weenassarin Ampoot; Yuthana Joyjinda                                                                                                                                                                                                                                                                                                                                                                                                                                                   |
| EPI_ISL_756311, EPI_ISL_756357, EPI_ISL_756367                                                                                                                                                                                                                                  | The Caribbean Public Health Agency                                                                                                       | Carrington Lab, Department of PreClinical Sciences, Faculty of Medical Sciences, The University of the West Indies         | ; Adesh Ramsubhag; Arienne Brown-Jordan; Avery Hinds; Chinna Chinnadurai; Christine V. F. Carrington; Christopher Oura; Gabriel Escobar; Jacqueline Bissor-McKenzie; Jaya Jayaraman; Jerome Foster; Karla Georges; Marsha Ivey; Naresh Nandram; Nikita S. D. Sahadeo; Nuno Faria; Oliver Pybus; Rahul Naidu; Rajini Haraksingh; Risha Singh; Roshan Parasram; Sarah Hill; Stanley Giddings; SueMin Nathaniel; Vernie Ramkissoon                                                                                                                                                                                                                                                                              |

|                                                                                                                                                                                                                                                                                                                                                |                                                                                                  |                                                                                                                        |                                                                                                                                                                                                                                                                                                                                                                                                                                                                                                                                                                                                                                                                                                                                                                                                                                                                                    |                                                                                           |
|------------------------------------------------------------------------------------------------------------------------------------------------------------------------------------------------------------------------------------------------------------------------------------------------------------------------------------------------|--------------------------------------------------------------------------------------------------|------------------------------------------------------------------------------------------------------------------------|------------------------------------------------------------------------------------------------------------------------------------------------------------------------------------------------------------------------------------------------------------------------------------------------------------------------------------------------------------------------------------------------------------------------------------------------------------------------------------------------------------------------------------------------------------------------------------------------------------------------------------------------------------------------------------------------------------------------------------------------------------------------------------------------------------------------------------------------------------------------------------|-------------------------------------------------------------------------------------------|
| EPI_ISL_539777, EPI_ISL_577636, EPI_ISL_626573, EPI_ISL_626584, EPI_ISL_660598, EPI_ISL_693667, EPI_ISL_693669, EPI_ISL_693671, EPI_ISL_693676, EPI_ISL_737028, EPI_ISL_737030, EPI_ISL_737031, EPI_ISL_737032, EPI_ISL_792693, EPI_ISL_792698, EPI_ISL_792700, EPI_ISL_792705, EPI_ISL_850675, EPI_ISL_850677, EPI_ISL_960412, EPI_ISL_960434 | see above                                                                                        | The National Institute of Public Health                                                                                | State Veterinary Institute Prague                                                                                                                                                                                                                                                                                                                                                                                                                                                                                                                                                                                                                                                                                                                                                                                                                                                  | A; Cernikova; D; H; J; Jirincova; L; M; Nagy; Novakova; Stara; Trinklova; Trnka; Vecerova |
| EPI_ISL_414477                                                                                                                                                                                                                                                                                                                                 | The National Institute of Public Health Center for Epidemiology and Microbiology                 | State Veterinary Institute Prague                                                                                      | Alexander Nagy; Dusan Trnka; Helena Jirincova; Jaromira Vecerova; Klara Labska; Ludmila Novakova; Oldrich Bartos; Olga Storkanova                                                                                                                                                                                                                                                                                                                                                                                                                                                                                                                                                                                                                                                                                                                                                  |                                                                                           |
| EPI_ISL_417765, EPI_ISL_827289, EPI_ISL_828191, EPI_ISL_828506, EPI_ISL_828811, EPI_ISL_829989                                                                                                                                                                                                                                                 | The National University Hospital of Iceland                                                      | deCODE genetics                                                                                                        | Agnar Helgason; Alma Moller; Arna B Agustsdottir; Arnaldur Gylfason; Asgeir Sigurdsson; Aslaug Jonasdottir; Berglind Eiriksdottir; Bjarni Thorbjornsson; Brynjar O Jenson; Daniel F Gudbjartsson; Droplaug N Magnúsdottir; Elisabet E Gardarsdottir; Emil A Thorenrensen; Gardar Sveinbjornsson; Gisl Masson; Gudmundur Georgsson; Gudmundur L Norddahl; Gudrun Sigmundsdottir; Hakon Jonsson; Hannes Eggertsson; Hilma Holm; Ingileif Jonsdottir; Jona Saemundsdottir; Kamilla S Josefsdottir; Kari Stefansson; Karl G Kristinnsson; Kjartan R Gudmundsson; Kristin E Sveinsdottir; Kristin E Sveinsdottir; Louise le Roux; Maney Sveinsdottir; Olafia S Gretarsdottir; Olafia S Gretarsdottir; Olafur T Magnússon; Pall Melsted; Patrick Sulem; Run Fridriksdottir; Solvi Rognavaldsson; Thora R Gunnarsdottir; Thordur Kristjansson; Thorolfur Gudnason; Unnur Thorsteinsdottir |                                                                                           |
| EPI_ISL_648132, EPI_ISL_913267                                                                                                                                                                                                                                                                                                                 | The Public Health Agency of Sweden                                                               | The Public Health Agency of Sweden                                                                                     | Anna Risberg; Anna-Malin Linde; Carlo Berg; Karin Tegmark-Wisell; Maria Lind Karlberg; Mattias Haukland; Mia Brytting; Noura Walai; Olov Svartstrom; Oskar Karlsson Lindsjo; Petra Edquist; Petra Holmstrom; Reza Advani; Sandra Brodsson; Sofia Stamouli                                                                                                                                                                                                                                                                                                                                                                                                                                                                                                                                                                                                                          |                                                                                           |
| EPI_ISL_754229, EPI_ISL_754230                                                                                                                                                                                                                                                                                                                 | The Republican Research and Practical Center for Epidemiology and Microbiology (RRPCEM)          | WHO National Influenza Centre Russian Federation                                                                       | Anatoly Krasko; Andrey Komissarov; Anna Ivanova; Artem Fadeev; Daria Danilenko; Dmitry Bazhenov; Dmitry Lioznov; Elena Gasich; Elena Nabieva; Georgii Bazzykin; Kirill Bulda; Ksenia Safina; Kseniya Komissarova                                                                                                                                                                                                                                                                                                                                                                                                                                                                                                                                                                                                                                                                   |                                                                                           |
| EPI_ISL_889316                                                                                                                                                                                                                                                                                                                                 | The University Hospital Brno                                                                     | Institute of Applied Biotechnologies a.s.                                                                              | Kateina Kvapilová; Martin Kašný; Martina Lengerová; Ondej Brzo; Petr Klemp; Petr Kvapil                                                                                                                                                                                                                                                                                                                                                                                                                                                                                                                                                                                                                                                                                                                                                                                            |                                                                                           |
| EPI_ISL_700428, EPI_ISL_700502                                                                                                                                                                                                                                                                                                                 | Thembaletu CDC wc THC                                                                            | NHLS/UCT                                                                                                               | Arash Iranzadeh; Bruna Galvao; Carolyn Williamson; Deelan Doolabh; Diana Hardie; Houriyah Tegally; Innocent Mudau; Kruger Marais; Lynn Tyers; Marvin Hsiao; Stephen Korsman                                                                                                                                                                                                                                                                                                                                                                                                                                                                                                                                                                                                                                                                                                        |                                                                                           |
| EPI_ISL_480033                                                                                                                                                                                                                                                                                                                                 | Tochigi Prefectural Institute of Public Health and Environmental Science                         | Pathogen Genomics Center, National Institute of Infectious Diseases                                                    | Ako Nakajima; Hajime Kamiya; Kentaro Itokawa; Makoto Kuroda; Masanori Hashino; Motoi Suzuki; Rina Tanaka; Tsuyoshi Sekizuka                                                                                                                                                                                                                                                                                                                                                                                                                                                                                                                                                                                                                                                                                                                                                        |                                                                                           |
| EPI_ISL_479889, EPI_ISL_685471, EPI_ISL_685666                                                                                                                                                                                                                                                                                                 | Tokyo Metropolitan Institute of Public Health                                                    | Pathogen Genomics Center, National Institute of Infectious Diseases                                                    | Hajime Kamiya; Kenji Sadamasu; Kentaro Itokawa; Makoto Kuroda; Mami Nagashima; Masanori Hashino; Motoi Suzuki; Rina Tanaka; Takashi Chiba; Tsuyoshi Sekizuka                                                                                                                                                                                                                                                                                                                                                                                                                                                                                                                                                                                                                                                                                                                       |                                                                                           |
| EPI_ISL_755812, EPI_ISL_961417, EPI_ISL_961420, EPI_ISL_962183                                                                                                                                                                                                                                                                                 | Toronto Invasive Bacterial Diseases Network                                                      | McMaster University                                                                                                    | Ahmed Draia; Allison McGeer; Andrew G. McArthur; Angel Li; Emily Panousis; Hooman Derakhshani; Jalees Nasir; Kuganya Nirmalarajah; Michael Surette; Patryk Aftanas; Samira Mubareka                                                                                                                                                                                                                                                                                                                                                                                                                                                                                                                                                                                                                                                                                                |                                                                                           |
| EPI_ISL_852880, EPI_ISL_853647                                                                                                                                                                                                                                                                                                                 | Toronto Invasive Bacterial Diseases Network                                                      | Ontario Institute for Cancer Research                                                                                  | Allison McGeer; Angel Li; Bernard Lam; Ilina Lungu; Jared T. Simpson; Kuganya Nirmalarajah; Lawrence E. Heisler; Lubaina Kothari; Michael Laszloffy; Patryk Aftanas; Paul Krzyzanowski; Richard de Borja; Samira Mubareka                                                                                                                                                                                                                                                                                                                                                                                                                                                                                                                                                                                                                                                          |                                                                                           |
| EPI_ISL_653917                                                                                                                                                                                                                                                                                                                                 | Translational Health Science and Technology Institute                                            | National Institute of Biomedical Genomics                                                                              | Anbalagan Ananthraj; Arindam Maitra; Gagandeep Kang; Guruprasad Medigeshi; Imran Khan; Madhu Mubarek; Saumitra Das; Sharanabasava Patil                                                                                                                                                                                                                                                                                                                                                                                                                                                                                                                                                                                                                                                                                                                                            |                                                                                           |
| EPI_ISL_542998                                                                                                                                                                                                                                                                                                                                 | TriCore Reference Laboratories                                                                   | Center for Global Health, University of New Mexico Health Sciences Center                                              | Darrell Dinwiddie; Daryl Domman; Joseph Hicks; Kurt Schwalm; Michael Edwards; Twila Kunde                                                                                                                                                                                                                                                                                                                                                                                                                                                                                                                                                                                                                                                                                                                                                                                          |                                                                                           |
| EPI_ISL_717692, EPI_ISL_717694, EPI_ISL_717695, EPI_ISL_717696, EPI_ISL_717697, EPI_ISL_717699, EPI_ISL_717700, EPI_ISL_756362, EPI_ISL_756363                                                                                                                                                                                                 | see above                                                                                        | Trinidad Public Health Laboratory                                                                                      | Carrington Lab, Department of PreClinical Sciences, Faculty of Medical Sciences, The University of the West Indies                                                                                                                                                                                                                                                                                                                                                                                                                                                                                                                                                                                                                                                                                                                                                                 |                                                                                           |
| EPI_ISL_837053                                                                                                                                                                                                                                                                                                                                 | UBS Darcy Alves e Robalinho                                                                      | Instituto Adolfo Lutz, Interdisciplinary Procedures Center, Strategic Laboratory                                       | Adesh Ramsabhag; Arianne Brown-Jordan; Avery Hinds; Chinna Chinnadurai; Christine V. F. Carrington; Christopher Oura; Gabriel Escobar; Jaya Jayaraman; Jerome Foster; Karla Georges; Marsha Ivey; Naresh Nandram; Nikita S. D. Sahadeo; Nuno Faria; Oliver Pybus; Rahul Naidu; Rajini Haraksingh; Risha Singh; Roshan Parasram; Sarah Hill; Stanley Giddings; SueMin Nathaniel; Vernie Ramkissoon                                                                                                                                                                                                                                                                                                                                                                                                                                                                                  |                                                                                           |
| EPI_ISL_1121309                                                                                                                                                                                                                                                                                                                                | UBS Jose Francisco Rezende                                                                       | Instituto Adolfo Lutz, Interdisciplinary Procedures Center, Strategic Laboratory                                       | Claudia Regina Gonçalves; Claudio Tavares Sacchi; Erica Valessa Ramos Gomes; Karoline Rodrigues Campos                                                                                                                                                                                                                                                                                                                                                                                                                                                                                                                                                                                                                                                                                                                                                                             |                                                                                           |
| EPI_ISL_648124, EPI_ISL_861459, EPI_ISL_861460                                                                                                                                                                                                                                                                                                 | UHAS COVID-19 Lab                                                                                | UHAS COVID-19 Lab                                                                                                      | John O. Gyapong and the UHAS COVID-19 Lab Team; Jones Gyamfi; Kwabena O. Duedu; Reuben Ayivor-Djanie                                                                                                                                                                                                                                                                                                                                                                                                                                                                                                                                                                                                                                                                                                                                                                               |                                                                                           |
| EPI_ISL_794656                                                                                                                                                                                                                                                                                                                                 | UNIDAD HEMATOLOGICA ESPECIALIZADA                                                                | Instituto Nacional de Salud - Dirección de Investigación en Salud Pública                                              | Carlos Franco-Muñoz; Diego A. Álvarez-Díaz; Diego Andrés Prada; Gerardo Santamaría; Jonathan Reales; Julian Naizaque; Katherine Laiton-Donato; Magdalena Wiesner; Marcela Mercado-Reyes; Maria T. Herrera; Martha Lucia Ospina Martinez; Mauricio Pacheco-Montealegre; Paola Muñoz-Laiton; Sheryl Corchuelo                                                                                                                                                                                                                                                                                                                                                                                                                                                                                                                                                                        |                                                                                           |
| EPI_ISL_1016955                                                                                                                                                                                                                                                                                                                                | UNMC Emerging Pathogens Laboratory                                                               | UNMC COVID-19 Response Team                                                                                            | UNMC COVID-19 Response Team                                                                                                                                                                                                                                                                                                                                                                                                                                                                                                                                                                                                                                                                                                                                                                                                                                                        |                                                                                           |
| EPI_ISL_853328, EPI_ISL_853352                                                                                                                                                                                                                                                                                                                 | UPMC Clinical Microbiology Laboratory                                                            | Microbial Genome Sequencing Center; Microbial Genomic Epidemiology Laboratory                                          | Chinelo Ezeonwuku; Dan Snyder; Jane W. Marsh; Kady D. Waggle; Lee H. Harrison; Marissa P. Griffith; Mustapha M. Mustapha; Stephanie L. Mitchell; Vatsala R. Srinivasa; Vaughn S. Cooper                                                                                                                                                                                                                                                                                                                                                                                                                                                                                                                                                                                                                                                                                            |                                                                                           |
| EPI_ISL_982557, EPI_ISL_982576, EPI_ISL_1036904, EPI_ISL_1091599, EPI_ISL_1091656, EPI_ISL_1091759, EPI_ISL_1091771                                                                                                                                                                                                                            | see above                                                                                        | US Air Force School of Aerospace Medicine                                                                              | US Air Force School of Aerospace Medicine                                                                                                                                                                                                                                                                                                                                                                                                                                                                                                                                                                                                                                                                                                                                                                                                                                          |                                                                                           |
| EPI_ISL_436045                                                                                                                                                                                                                                                                                                                                 | US VI Department of Health                                                                       | Pathogen Discovery, Respiratory Viruses Branch, Division of Viral Diseases, Centers for Disease Control and Prevention | Amanda Javorina; Anthony Fries; Clarise Starr; Elizabeth Macias; Jennifer Meyer; Sarah Purves; William Buggele; William Gruner                                                                                                                                                                                                                                                                                                                                                                                                                                                                                                                                                                                                                                                                                                                                                     |                                                                                           |
| EPI_ISL_416639, EPI_ISL_570104, EPI_ISL_1110100                                                                                                                                                                                                                                                                                                | UW Virology Lab                                                                                  | UW Virology Lab                                                                                                        | Anna Uehara; Bettina Bankamp; Clinton R. Paden; Haibin Wang; Jing Zhang; Krista Queen; Suxiang Tong; Yan Li; Ying Tao; Zachary Weiner                                                                                                                                                                                                                                                                                                                                                                                                                                                                                                                                                                                                                                                                                                                                              |                                                                                           |
| EPI_ISL_734724, EPI_ISL_734747, EPI_ISL_734994, EPI_ISL_738458                                                                                                                                                                                                                                                                                 | UZ Leuven, National Reference Laboratory for Coronaviruses, Laboratory Medicine, Leuven, Belgium | KU Leuven, Rega Institute, Clinical and Epidemiological Virology                                                       | Alexander Greninger; Amin Addetia; Hong Xie; Keith Jerome; Keith R Jerome; Lasata Shrestha; Meei-Li Huang; Michelle Lin; Noah Baker; Pavitra Roychoudhury; Shah Mohamed Bakhsh; Victoria M Rachleff                                                                                                                                                                                                                                                                                                                                                                                                                                                                                                                                                                                                                                                                                |                                                                                           |
| EPI_ISL_737941, EPI_ISL_737946, EPI_ISL_737947, EPI_ISL_737955, EPI_ISL_737973, EPI_ISL_737994, EPI_ISL_738007, EPI_ISL_738038, EPI_ISL_738043                                                                                                                                                                                                 | see above                                                                                        | Uganda Central Public Health Lab and Uganda Virus Research Institute                                                   | Bert Vanmechelen; Joan Marti-Carerras; Piet Maes; Tony Wawina-Bokalanga                                                                                                                                                                                                                                                                                                                                                                                                                                                                                                                                                                                                                                                                                                                                                                                                            |                                                                                           |
| EPI_ISL_1008714                                                                                                                                                                                                                                                                                                                                | Unidad de Patología Clínica                                                                      | Instituto de diagnóstico y Referencia Epidemiológicos (INDRE) Departamento de Virología                                | Dan Lule Bugembe; Matthew Cotten; My V.T. Phan; Pontiano Kaleebu et al.                                                                                                                                                                                                                                                                                                                                                                                                                                                                                                                                                                                                                                                                                                                                                                                                            |                                                                                           |
| EPI_ISL_940628                                                                                                                                                                                                                                                                                                                                 | Unidade Mista de Iguape                                                                          | Instituto Adolfo Lutz, Interdisciplinary Procedures Center, Strategic Laboratory                                       | Abril Rodriguez-Maldonado; Claudia Wong-Arambula; Ernesto Ramirez-Gonzalez.; Fabiola Garces-Ayala; Gisela Barrera-Badillo; Irma Lopez-Martinez; Lucia Hernandez-Rivas; Natividad Cruz-Ortiz; Tatiana Nunez-Garcia                                                                                                                                                                                                                                                                                                                                                                                                                                                                                                                                                                                                                                                                  |                                                                                           |
| EPI_ISL_1008541                                                                                                                                                                                                                                                                                                                                | Unilabs AB, Klinisk mikrobiologi                                                                 | The Public Health Agency of Sweden                                                                                     | Claudia Regina Gonçalves; Claudio Tavares Sacchi; Erica Valessa Ramos Gomes; Karoline Rodrigues Campos                                                                                                                                                                                                                                                                                                                                                                                                                                                                                                                                                                                                                                                                                                                                                                             |                                                                                           |
| EPI_ISL_812611, EPI_ISL_812622, EPI_ISL_812647, EPI_ISL_812665, EPI_ISL_812698, EPI_ISL_831692, EPI_ISL_831696, EPI_ISL_831698, EPI_ISL_831749, EPI_ISL_831756, EPI_ISL_831760, EPI_ISL_831763, EPI_ISL_831807, EPI_ISL_831817, EPI_ISL_831827, EPI_ISL_831830, EPI_ISL_831850, EPI_ISL_831870, EPI_ISL_831875                                 | see above                                                                                        | United States Air Force School of Aerospace Medicine                                                                   | United States Air Force School of Aerospace Medicine                                                                                                                                                                                                                                                                                                                                                                                                                                                                                                                                                                                                                                                                                                                                                                                                                               |                                                                                           |
| EPI_ISL_671668                                                                                                                                                                                                                                                                                                                                 | Unity Health Toronto                                                                             | Ontario Institute for Cancer Research                                                                                  | Amanda Javorina; Anthony Fries; Clarise Starr; Elizabeth Macias; Jennifer Meyer; Sarah Purves; William Gruner                                                                                                                                                                                                                                                                                                                                                                                                                                                                                                                                                                                                                                                                                                                                                                      |                                                                                           |
| EPI_ISL_525467                                                                                                                                                                                                                                                                                                                                 | Universidad Iberoamericana                                                                       | International Centre for Genetic Engineering and Biotechnology (ICGEB) and ARGO Open Lab Platform                      | Bernard Lam; Felicia Vincelli; Ilina Lungu; Jared T. Simpson; Jeremy Johns; Karel Boissinot; Larissa M. Matukas; Le Luu; Mark Downing; Paul Krzyzanowski; Philip Zuzarte; Ramzi Fattouh; Richard de Borja; Samira Mubareka; TIBDN; Trina Otterman; Wai Sum Siu; Yan Chen; Zhi Cui                                                                                                                                                                                                                                                                                                                                                                                                                                                                                                                                                                                                  |                                                                                           |
| EPI_ISL_1035991                                                                                                                                                                                                                                                                                                                                | Universidad de León                                                                              | SeqCOVID-SPAIN consortium/IBV(CSIC)                                                                                    | Alejandro Vallejo Degaudenzi; Danilo Licastro; Eileen Riego; Leandro Tapia; Patricia Leon; Robert Paulino-Ramirez; Simeone Dal Monego; Sreejith Rajasekharan and Alessandro Marcello.; Victor Virgilio Calderon                                                                                                                                                                                                                                                                                                                                                                                                                                                                                                                                                                                                                                                                    |                                                                                           |
|                                                                                                                                                                                                                                                                                                                                                |                                                                                                  |                                                                                                                        | Ana Carvajal; Antonio J. Molina and SeqCOVID-SPAIN consortium; Héctor Argüello; Juan M. Fregeneda; Tania Fernández-Villa; Vicente Martín                                                                                                                                                                                                                                                                                                                                                                                                                                                                                                                                                                                                                                                                                                                                           |                                                                                           |



|                                                                                                                                                                                                                                                                                                                                                                                                                                                                                                                                                                |                                                                                                    |                                                                                                                                |                                                                                                                                                                                                                                                                                                                                                                                                                                                                                                                                                                                  |
|----------------------------------------------------------------------------------------------------------------------------------------------------------------------------------------------------------------------------------------------------------------------------------------------------------------------------------------------------------------------------------------------------------------------------------------------------------------------------------------------------------------------------------------------------------------|----------------------------------------------------------------------------------------------------|--------------------------------------------------------------------------------------------------------------------------------|----------------------------------------------------------------------------------------------------------------------------------------------------------------------------------------------------------------------------------------------------------------------------------------------------------------------------------------------------------------------------------------------------------------------------------------------------------------------------------------------------------------------------------------------------------------------------------|
| EPI_ISL_437945                                                                                                                                                                                                                                                                                                                                                                                                                                                                                                                                                 | Universitaetsklinik für Innere Medizin II Innsbruck                                                | Bergthaler laboratory, CeMM Research Center for Molecular Medicine of the Austrian Academy of Sciences                         | Alexander Lercher; Alexandra Popa; Andreas Bergthaler; Benedikt Agerer; Christoph Bock; Dorothee von Laer; Elisabeth Puchhammer-Stoeckl; Guenter Weiss; Henrique Colaco; Jakob-Wendelin Genger; Jan Laine; Judith Aberle; Lukas Endler; Manfred Nairz; Mark Smyth; Martin Senekowitsch; Michael Schuster; Stephan Aberle; Thomas Penz; Wegene Borena                                                                                                                                                                                                                             |
| EPI_ISL_529963                                                                                                                                                                                                                                                                                                                                                                                                                                                                                                                                                 | Universitas Airlangga Hospital                                                                     | Institute of Tropical Disease, Universitas Airlangga                                                                           | Aldise M Nastro; Gatot Soegiarto; Jezzy R Dewantari; Kazufumi Shimizu; Krisnoadi Rahardjo; Laksmi Wulandari; Maria I Lusida; Mitsuhiro Nishimura; Nasronudin; Resti Yudhawati; Retno A Setyoningrum; Rima R Prasetya; Soetjipto; Yasuko Mori; Yokko K Shimizu                                                                                                                                                                                                                                                                                                                    |
| EPI_ISL_1020134                                                                                                                                                                                                                                                                                                                                                                                                                                                                                                                                                | University Clinic of Nephrology- Skopje                                                            | Research Center for Genetic Engineering and Biotechnology "Georgi D. Efremov", Macedonian Academy of Sciences and Arts         | Aleksandar J. Dimovski; Dijana Plasheska-Karanfilska; Gjorgji Bozinovski; Milena Jakimovska; Predrag Noveski                                                                                                                                                                                                                                                                                                                                                                                                                                                                     |
| EPI_ISL_462753                                                                                                                                                                                                                                                                                                                                                                                                                                                                                                                                                 | University Clinical Hospital of Mostar                                                             | University of Sarajevo Veterinary Faculty                                                                                      | Eterovic, T.; Goletic, S.; Goletic, T.; Hukic, M.; Ostojic, M.; Seho-Alic, A.; Softic, A.                                                                                                                                                                                                                                                                                                                                                                                                                                                                                        |
| EPI_ISL_812966, EPI_ISL_812967                                                                                                                                                                                                                                                                                                                                                                                                                                                                                                                                 | University Clinical Research Center, University of Sciences                                        | University Clinical Research Center, University of Sciences                                                                    | A.A.; Bane, S.; Dao, S.; Diakite, M.; Diarra, B.; Doumbia, S.; Guindo, I.; Iknane; Kone, A.                                                                                                                                                                                                                                                                                                                                                                                                                                                                                      |
| EPI_ISL_877231, EPI_ISL_877232                                                                                                                                                                                                                                                                                                                                                                                                                                                                                                                                 | University College Sedaya International (UCSI University)                                          | Institute for Medical Research, Infectious Disease Research Centre, National Institutes of Health, Ministry of Health Malaysia | Azizan MA; Kamel K; Sekaran SD; Suppiah J; Thayan R                                                                                                                                                                                                                                                                                                                                                                                                                                                                                                                              |
| EPI_ISL_528082, EPI_ISL_830732, EPI_ISL_931294, EPI_ISL_931315, EPI_ISL_931381                                                                                                                                                                                                                                                                                                                                                                                                                                                                                 | University Hospital Basel, Clinical Virology                                                       | University Hospital Basel, Clinical Bacteriology                                                                               | Adrian Egli; Alexander Gensch; Alfredo Mari; Christian Nickel; Hans Hirsch; Hans Pargger; Helena MB Seth-Smith; Julia Bielicki; Karoline Leuzinger; Kirstine K. Soegaard; Madlen Stange; Manuel Battegay; Martin Siegemund; Michael Osthoff; Michael Schweitzer; Myrta Brunner; Rita Schneider-Sliwa; Roland Bingisser; Sarah Tschudin-Sutter; Simon Fuchs; Stefano Bassetti; Tim Roloff                                                                                                                                                                                         |
| EPI_ISL_710548, EPI_ISL_710551, EPI_ISL_710556, EPI_ISL_710569, EPI_ISL_710571                                                                                                                                                                                                                                                                                                                                                                                                                                                                                 | University Hospital Dubrava                                                                        | Ruer Boškovic Institute; Forensic Science Centre Ivan Vueti; University of Zagreb Faculty of Science                           | Ana Livun; Antonela Blažeković; Boris Maek; Danilo Licastro; Dunja Glavaš; Fran Boroveki; Fuad osovi; Gordana Maravi Vlahoviek; Ivan Šamija; Ivana elap; Jasna Kašman; Josipa Skelin; Katarina Marija Tupek; Kristian Vlahoviek; Kristina Gotovac Jere; Lidija Cvetko-Krajnovi; Lucija Basi; Lucija Markulin; Maja Kuzman; Marina Korolija; Mario Stefanovi; Mirjana Domazet-Lošo; Paula Stanci; Petra Vrabec; Robert Beluži; Rosa Karli; Sanja Tadinac; Senica Pejša; Tomislav Domazet-Lošo; Valentina umiljan-Combai; Vjekoslav Tomai; Vladimir Krajnovi; Željka Maak Safranko |
| EPI_ISL_1109513, EPI_ISL_1109522, EPI_ISL_1109531, EPI_ISL_1109532                                                                                                                                                                                                                                                                                                                                                                                                                                                                                             | University Hospital for Infectious Diseases                                                        | Croatian Institute of Public Health                                                                                            | Irena Tabain; Ivana Ferenak                                                                                                                                                                                                                                                                                                                                                                                                                                                                                                                                                      |
| EPI_ISL_708066                                                                                                                                                                                                                                                                                                                                                                                                                                                                                                                                                 | University Hospital of Northern Norway, Department for Microbiology and Infectious Disease Control | Norwegian Institute of Public Health, Department of Virology                                                                   | Hilde Elshaug; Hilde Vollan; Kamilla Heddeland Instefjord; Karoline Bragstad; Kathrine Stene-Johansen; Marie Paulsen Madsen; Olav Hungnes; Rasmus Riis Kopperud                                                                                                                                                                                                                                                                                                                                                                                                                  |
| EPI_ISL_897700, EPI_ISL_953630, EPI_ISL_953785, EPI_ISL_1040375, EPI_ISL_1040378                                                                                                                                                                                                                                                                                                                                                                                                                                                                               | University Hospitals of Geneva, Laboratory of Virology                                             | HUG, Laboratory of Virology and the Health2030 Genome Center                                                                   | Ana Rita Goncalves; Deborah Penet; Emmanouil Dermitzakis; Henri Pegeot; Ioannis Xenarios; Keith Harshman; Laurent Kaiser; Lorenzo Cerutti; Melyssa Elies; Samuel Cordey                                                                                                                                                                                                                                                                                                                                                                                                          |
| EPI_ISL_1072985                                                                                                                                                                                                                                                                                                                                                                                                                                                                                                                                                | University of Balamand                                                                             | Microbial Genomics Lab, Lebanese American University, Byblos                                                                   | Mira El Chaar; Sima Tokajian; Youssef Bassim                                                                                                                                                                                                                                                                                                                                                                                                                                                                                                                                     |
| EPI_ISL_671424, EPI_ISL_826272                                                                                                                                                                                                                                                                                                                                                                                                                                                                                                                                 | University of Debrecen, Department of Medical Microbiology                                         | National Laboratory of Virology, Szentágotthai Research Centre                                                                 | Balázs Somogyi; Brigitta Zana; Endre Gábor Tóth; Eszter Csoma; Ferenc Jakab; Gábor Kemenesi                                                                                                                                                                                                                                                                                                                                                                                                                                                                                      |
| EPI_ISL_965352, EPI_ISL_965353, EPI_ISL_1040534                                                                                                                                                                                                                                                                                                                                                                                                                                                                                                                | University of Liège COVID-19 testing center                                                        | GIGA Medical Genomics                                                                                                          | Bouchra Boujemla; Cécile Meex; Emmanuel André; Fabrice Bureau; Keith Durkin; Laurent Gillet; Marc Van Ranst; Maria Artesi; Marie-Pierre Hayette; Nathalie Renotte; Sébastien Bontems; Vincent Bours; Wouter Coppieters                                                                                                                                                                                                                                                                                                                                                           |
| EPI_ISL_896375                                                                                                                                                                                                                                                                                                                                                                                                                                                                                                                                                 | University of Medicine and Pharmacy of Craiova                                                     | "Stefan cel Mare" University Metagenomics Lab                                                                                  | Gheorghita Roxana; Lobiuc Andrei                                                                                                                                                                                                                                                                                                                                                                                                                                                                                                                                                 |
| EPI_ISL_602306, EPI_ISL_1016489, EPI_ISL_1016503                                                                                                                                                                                                                                                                                                                                                                                                                                                                                                               | University of Miami Immunology and Histocompatibility Laboratory                                   | University of Miami Immunology and Histocompatibility Laboratory                                                               | Emilio Margolles-Clark; MD; PhD; PhD; and Phillip Ruiz                                                                                                                                                                                                                                                                                                                                                                                                                                                                                                                           |
| EPI_ISL_484802, EPI_ISL_583259, EPI_ISL_873068, EPI_ISL_873147, EPI_ISL_955881, EPI_ISL_1014805                                                                                                                                                                                                                                                                                                                                                                                                                                                                | University of Michigan Clinical Microbiology Laboratory                                            | Lauring Lab, University of Michigan, Department of Microbiology and Immunology                                                 | Valesano; Valesano et al.                                                                                                                                                                                                                                                                                                                                                                                                                                                                                                                                                        |
| EPI_ISL_955142, EPI_ISL_955144, EPI_ISL_955151, EPI_ISL_955155, EPI_ISL_955156, EPI_ISL_955170, EPI_ISL_955171, EPI_ISL_955185, EPI_ISL_955188, EPI_ISL_1016690, EPI_ISL_1016843, EPI_ISL_1016885, EPI_ISL_1016970                                                                                                                                                                                                                                                                                                                                             | see above                                                                                          | University of Sarajevo, Veterinary Faculty, Laboratory for Molecular Diagnostic and Research Laboratory                        | Alic-Seho A.; Ali-Šeho A.; Goletic S.; Goletic T.; Goleti T.; Goleti Š.; Hodžić A.; Hodži A.; Jazić A.; Jaži A.; Nicević M.; Nicević M.; Sabić E.; Softić A.; Softić A.; Terzić I.; Terzić I.; Terzi I.; Terzi I. Jaži A.; Šabić E.                                                                                                                                                                                                                                                                                                                                              |
| EPI_ISL_485389                                                                                                                                                                                                                                                                                                                                                                                                                                                                                                                                                 | University of Ulsan College of Medicine and Asan Medical Center                                    | University of Ulsan College of Medicine and Asan Medical Center                                                                | Heungsung Sung; Jaewoong Lee; Jina Lee; Jiwon Jung; Jongshik Chun; Kihyun Lee; Kueynoul Park; Kyu-Hwa Hur; Mauricio Chalita; Mi-Na Kim; Seok-Hwan Yoon; Sung-Han Kim; and Hae Kyung Lee                                                                                                                                                                                                                                                                                                                                                                                          |
| EPI_ISL_495460, EPI_ISL_522902, EPI_ISL_677333, EPI_ISL_728061, EPI_ISL_754627, EPI_ISL_779321, EPI_ISL_1064300, EPI_ISL_1110646                                                                                                                                                                                                                                                                                                                                                                                                                               | see above                                                                                          | University of Wisconsin-Madison AIDS Vaccine Research Laboratories                                                             | Gage Moreno; Katarina Braun; et al. AIDS Vaccine Research Laboratories                                                                                                                                                                                                                                                                                                                                                                                                                                                                                                           |
| EPI_ISL_977256, EPI_ISL_977270, EPI_ISL_977276, EPI_ISL_977278, EPI_ISL_977286, EPI_ISL_977289, EPI_ISL_977290, EPI_ISL_977291, EPI_ISL_977292, EPI_ISL_977329, EPI_ISL_977334, EPI_ISL_977336, EPI_ISL_977337, EPI_ISL_977338, EPI_ISL_977339, EPI_ISL_977340, EPI_ISL_977341, EPI_ISL_977342, EPI_ISL_977343, EPI_ISL_977346, EPI_ISL_977347, EPI_ISL_977348, EPI_ISL_977349, EPI_ISL_977350, EPI_ISL_977351, EPI_ISL_977352, EPI_ISL_977354, EPI_ISL_977357, EPI_ISL_977364, EPI_ISL_977367, EPI_ISL_977418, EPI_ISL_977421, EPI_ISL_977462, EPI_ISL_977468 | see above                                                                                          | University of Zambia, School of Veterinary Medicine                                                                            | Daniel Bridges; Mulenga Mwenda-Chimfwembe; Ngonda Saasa                                                                                                                                                                                                                                                                                                                                                                                                                                                                                                                          |
| EPI_ISL_708818                                                                                                                                                                                                                                                                                                                                                                                                                                                                                                                                                 | Urban Institute for Disease Prevention and Control                                                 | National Institute of Health, Department of Medical Sciences, Ministry of Public Health, Thailand                              | Malinee Chittaganpitch; Pakorn Piromtong; Pilailuk Okada; Siripaporn Phuygun; Sittiporn Parmmen; Sunthareeya Waicharoen; Thanutsapa Thanadachakul; Warawan Wongboot                                                                                                                                                                                                                                                                                                                                                                                                              |
| EPI_ISL_417973, EPI_ISL_498663, EPI_ISL_594011, EPI_ISL_628949, EPI_ISL_684011, EPI_ISL_746840, EPI_ISL_746849, EPI_ISL_812406, EPI_ISL_930682, EPI_ISL_930685, EPI_ISL_930728, EPI_ISL_943844, EPI_ISL_943956, EPI_ISL_1049231                                                                                                                                                                                                                                                                                                                                | see above                                                                                          | Utah Public Health Laboratory                                                                                                  | Erin L. Young; Erin Young; Heidi Butz; Kelly F. Oakeson; Tara Gallagher                                                                                                                                                                                                                                                                                                                                                                                                                                                                                                          |
| EPI_ISL_903572, EPI_ISL_903579, EPI_ISL_903718, EPI_ISL_903929                                                                                                                                                                                                                                                                                                                                                                                                                                                                                                 | VT Dept. of Health Laboratory                                                                      | Genomics and Discovery, Respiratory Viruses Branch, Division of Viral Diseases, Centers for Disease Control and Prevention     | Anna Montmayeur; Anna Uehara; Ben L. Rambo-Martin; Clinton R. Paden; Dhvani Batra; Haibin Wang; Jasmine Padilla; Jing Zhang; Justin Lee; Krista Queen; Lori Rowe; Mark Burroughs; Mili Sheth; Peter W. Cook; Rachel Marine; Sarah Nobles; Suxiang Tong; Yan Li; Ying Tao                                                                                                                                                                                                                                                                                                         |
| EPI_ISL_940865                                                                                                                                                                                                                                                                                                                                                                                                                                                                                                                                                 | Vaccines and Infectious Diseases Analytics Research Unit (VIDA)                                    | KRISP, KZN Research Innovation and Sequencing Platform                                                                         | Baillie Vicky; Giandhari Jennifer; Madhi Shabir; Naidoo Yeshnee; Pillay Sureshnee; Tegally Houriyah; de Oliveira Tulio; du Plessis Jeanine                                                                                                                                                                                                                                                                                                                                                                                                                                       |
| EPI_ISL_802578                                                                                                                                                                                                                                                                                                                                                                                                                                                                                                                                                 | Vault Health                                                                                       | Minnesota Department of Health, Public Health Laboratory                                                                       | Alexandra Lorentz; Jacob Garfin; Matt Plumb; and Xiong Wang                                                                                                                                                                                                                                                                                                                                                                                                                                                                                                                      |
| EPI_ISL_1118318                                                                                                                                                                                                                                                                                                                                                                                                                                                                                                                                                | Vestfold Hospital, Toensberg Department of Microbiology                                            | Norwegian Institute of Public Health, Department of Virology                                                                   | Atiya R Ali; Debech Nadia; Engebretsen Serina Beate; Garcia Llorente Ignacio; Hilde Elshaug; Hilde Vollan; Kamilla Heddeland Instefjord; Karoline Bragstad; Kathrine Stene-Johansen; Marie Paulsen Madsen; Olav Hungnes; Pedersen Benedikte Nevjen; Rasmus Riis Kopperud                                                                                                                                                                                                                                                                                                         |
| EPI_ISL_678486                                                                                                                                                                                                                                                                                                                                                                                                                                                                                                                                                 | Veterinary Specialized Institute "Sabac", Serbia                                                   | Veterinary Specialized Institute "Kraljevo", Serbia                                                                            | Afonso, C.; Banovic Djeri, B.; Jankovic, M.; Jovanovic, T.; Knezevic, A.; Mrkovacki, S.; Petrovic, T.; Sekler, M.; Tesovic, B.; Vidanovic, D.; Volkening, J.                                                                                                                                                                                                                                                                                                                                                                                                                     |
| EPI_ISL_904010, EPI_ISL_904011                                                                                                                                                                                                                                                                                                                                                                                                                                                                                                                                 | Veterinary Specialized Institute Kraljevo                                                          | Veterinary Specialized Institute "Kraljevo", Serbia                                                                            | Afonso, C.; Banovic Djeri, B.; Jankovic, M.; Jovanovic, T.; Knezevic, A.; Petrovic, T.; Sekler, M.; Tesovic, B.; Vidanovic, D.; Volkening, J.                                                                                                                                                                                                                                                                                                                                                                                                                                    |
| EPI_ISL_708823                                                                                                                                                                                                                                                                                                                                                                                                                                                                                                                                                 | Vibharam Hospital                                                                                  | National Institute of Health, Department of Medical Sciences, Ministry of Public Health, Thailand                              | Malinee Chittaganpitch; Pakorn Piromtong; Pilailuk Okada; Siripaporn Phuygun; Sittiporn Parmmen; Sunthareeya Waicharoen; Thanutsapa Thanadachakul; Warawan Wongboot                                                                                                                                                                                                                                                                                                                                                                                                              |
| EPI_ISL_1040746, EPI_ISL_1040776                                                                                                                                                                                                                                                                                                                                                                                                                                                                                                                               | Victoria Hospital wc VHW                                                                           | NHLS/UCT                                                                                                                       | Arash Iranzadeh; Bruna Galvao; Carolyn Williamson; Deelan Doolabh; Diana Hardie; Innocent Mudau; Kruger Marais; Lynn Tyers; Marvin Hsiao; Stephen Korsman                                                                                                                                                                                                                                                                                                                                                                                                                        |
| EPI_ISL_427092, EPI_ISL_427130                                                                                                                                                                                                                                                                                                                                                                                                                                                                                                                                 | Victorian Infectious Diseases Reference Laboratory (VIDRL)                                         | Microbiological Diagnostic Unit Public Health Laboratory and Victorian Infectious Diseases Reference Laboratory, Doherty       | Caly L.; Druce J.; Sait, M.; Schultz M.; Seemann T.; Sherry, N.                                                                                                                                                                                                                                                                                                                                                                                                                                                                                                                  |

|                                                                                                                                                                                                                                                                                                                                                                  |                                                                                                                                                                                                 | Institute                                                                                                                                                                                                                                                 |                                                                                                                                                                                                                                                                                                                                                                                                                                                                                                                                                                                                                                                                                                                                            |
|------------------------------------------------------------------------------------------------------------------------------------------------------------------------------------------------------------------------------------------------------------------------------------------------------------------------------------------------------------------|-------------------------------------------------------------------------------------------------------------------------------------------------------------------------------------------------|-----------------------------------------------------------------------------------------------------------------------------------------------------------------------------------------------------------------------------------------------------------|--------------------------------------------------------------------------------------------------------------------------------------------------------------------------------------------------------------------------------------------------------------------------------------------------------------------------------------------------------------------------------------------------------------------------------------------------------------------------------------------------------------------------------------------------------------------------------------------------------------------------------------------------------------------------------------------------------------------------------------------|
| EPI_ISL_430637                                                                                                                                                                                                                                                                                                                                                   | Victorian Infectious Diseases Reference Laboratory (VIDRL)                                                                                                                                      | Microbiological Diagnostic Unit Public Health Laboratory and Victorian Infectious Diseases Reference Laboratory, The Peter Doherty Institute for Infection and Immunity                                                                                   | Caly L.; Druce J.; Sait, M.; Schultz M.; Seemann T.; Sherry, N.                                                                                                                                                                                                                                                                                                                                                                                                                                                                                                                                                                                                                                                                            |
| EPI_ISL_480779, EPI_ISL_521868, EPI_ISL_522085, EPI_ISL_561893, EPI_ISL_561946, EPI_ISL_564348, EPI_ISL_592863, EPI_ISL_592865, EPI_ISL_779606, EPI_ISL_779609, EPI_ISL_779626, EPI_ISL_779632, EPI_ISL_812435, EPI_ISL_812436, EPI_ISL_854762, EPI_ISL_962830, EPI_ISL_962831, EPI_ISL_979362, EPI_ISL_979363, EPI_ISL_979364, EPI_ISL_1033154, EPI_ISL_1033155 |                                                                                                                                                                                                 |                                                                                                                                                                                                                                                           |                                                                                                                                                                                                                                                                                                                                                                                                                                                                                                                                                                                                                                                                                                                                            |
| see above                                                                                                                                                                                                                                                                                                                                                        | Victorian Infectious Diseases Reference Laboratory (VIDRL)                                                                                                                                      | VIDRL and MDU-PHL                                                                                                                                                                                                                                         | Caly L.; Caly, L.; Druce J.; M. B.; M.L.; N.L.; Sait; Sait, M.; Schultz; Schultz M.; Seemann T.; Seemann, T.; Sherry; Sherry, N.                                                                                                                                                                                                                                                                                                                                                                                                                                                                                                                                                                                                           |
| EPI_ISL_416415, EPI_ISL_419733, EPI_ISL_419734, EPI_ISL_419735                                                                                                                                                                                                                                                                                                   | Victorian Infectious Diseases Reference Laboratory (VIDRL)                                                                                                                                      | Victorian Infectious Diseases Reference Laboratory and Microbiological Diagnostic Unit Public Health Laboratory, Doherty Institute                                                                                                                        | Caly L.; Druce J.; Sait, M.; Schultz M.; Seemann T.; Sherry, N.; Taiaroa, G.                                                                                                                                                                                                                                                                                                                                                                                                                                                                                                                                                                                                                                                               |
| EPI_ISL_802863, EPI_ISL_904950                                                                                                                                                                                                                                                                                                                                   | Vilnius University Hospital Santaros Klinikos, Vilnius University                                                                                                                               | Institute of Biotechnology, Life Sciences Center, Vilnius University                                                                                                                                                                                      | Albertas Timinskas; Alma Gedvilaite; Aurelija Zvirbliene; Daniel Naumovas; Emilija Vasilunaite; Laimonas Griskevicius; Milda Norkiene                                                                                                                                                                                                                                                                                                                                                                                                                                                                                                                                                                                                      |
| EPI_ISL_560405                                                                                                                                                                                                                                                                                                                                                   | Vilnius University Hospital Santaros Klinikos, Vilnius University                                                                                                                               | Institute of Biotechnology, Life Sciences Center, Vilnius University and Thermo Fisher Scientific                                                                                                                                                         | Albertas Timinskas; Alma Gedvilaite; Aurelija Zvirbliene; Daniel Naumovas; Justinas Slikas; Laimonas Griskevicius; Ligita Jancioriene; Mindaugas Paulauskas                                                                                                                                                                                                                                                                                                                                                                                                                                                                                                                                                                                |
| EPI_ISL_914884, EPI_ISL_914886                                                                                                                                                                                                                                                                                                                                   | Vilnius university hospital Santaros Klinikos, Center of Laboratory Medicine                                                                                                                    | Vilnius University Hospital Santaros Klinikos                                                                                                                                                                                                             | Daniel Naumovas; Dovil Ezerskyt; Ingrida Olendraite; Justinas Šlikas; Rimvydas Norvilas                                                                                                                                                                                                                                                                                                                                                                                                                                                                                                                                                                                                                                                    |
| EPI_ISL_933898, EPI_ISL_933945, EPI_ISL_934037, EPI_ISL_934051, EPI_ISL_934241, EPI_ISL_934278, EPI_ISL_1005231, EPI_ISL_1005290, EPI_ISL_1005293, EPI_ISL_1005325                                                                                                                                                                                               |                                                                                                                                                                                                 |                                                                                                                                                                                                                                                           |                                                                                                                                                                                                                                                                                                                                                                                                                                                                                                                                                                                                                                                                                                                                            |
| see above                                                                                                                                                                                                                                                                                                                                                        | Vilnius university hospital Santaros Klinikos, Center of Laboratory Medicine                                                                                                                    | Vilnius university hospital Santaros Klinikos, Center of Laboratory Medicine                                                                                                                                                                              | Daniel Naumovas; Dovile Ezerskyte; Gytis Dudas; Ingrida Olendraite; Justinas Slikas; Laimonas Griskevicius; Rimvydas Norvilas                                                                                                                                                                                                                                                                                                                                                                                                                                                                                                                                                                                                              |
| EPI_ISL_476102, EPI_ISL_523926, EPI_ISL_539349, EPI_ISL_539411, EPI_ISL_560419, EPI_ISL_603527, EPI_ISL_693813, EPI_ISL_728798, EPI_ISL_728805, EPI_ISL_737424, EPI_ISL_796443, EPI_ISL_796510, EPI_ISL_899428, EPI_ISL_1004123, EPI_ISL_1004993, EPI_ISL_1005134, EPI_ISL_1118943, EPI_ISL_1119436, EPI_ISL_1130397, EPI_ISL_1130674, EPI_ISL_1130807           |                                                                                                                                                                                                 |                                                                                                                                                                                                                                                           |                                                                                                                                                                                                                                                                                                                                                                                                                                                                                                                                                                                                                                                                                                                                            |
| see above                                                                                                                                                                                                                                                                                                                                                        | Viollier AG                                                                                                                                                                                     | Department of Biosystems Science and Engineering, ETH Zürich                                                                                                                                                                                              | Andrea Patrignani; Andrea Cabral de Gouvea; Catharine Aquino; Chaoran Chen; Christian Beisel; Christiane Beckmann; Christoph Noppen; David Dreifuss; Deborah Penet; Doris Popovic; Elodie Burcklen; Emmanouil Dermitzakis; Griffin White; Henri Pegeot; Ina Nissen; Ioannis Xenarios; Ivan Topolsky; Jay Tracy; Katharina Jahn; Keith Harshman; Lara Fuhrmann; Laura Neff; Lennart Opitz; Lorenzo Cerutti; Lorenzo Domenica Moccia; Maurice Redondo; Mirjam Feldkamp; Natascha Santacrose; Niko Beerenwinkel; Noemie Santamaria de Souza; Olivier Kobel; Pedro Ferreira; Philipp Jablonski; Ralph Schlapbach; Rebecca Denes; Sarah Nadeau; Simon Grüter; Sophie Seidel; Susana Posada-Céspedes; Tanja Stadler; Timothy Sykes; Tobias Schär |
| EPI_ISL_417947, EPI_ISL_435166, EPI_ISL_447239, EPI_ISL_527530, EPI_ISL_591083, EPI_ISL_591085, EPI_ISL_591086, EPI_ISL_965122, EPI_ISL_965123, EPI_ISL_965124                                                                                                                                                                                                   |                                                                                                                                                                                                 |                                                                                                                                                                                                                                                           |                                                                                                                                                                                                                                                                                                                                                                                                                                                                                                                                                                                                                                                                                                                                            |
| see above                                                                                                                                                                                                                                                                                                                                                        | Viral Respiratory Lab, National Institute for Biomedical Research (INRB)                                                                                                                        | Pathogen Sequencing Lab, National Institute for Biomedical Research (INRB)                                                                                                                                                                                | Allison Black; Amuri Aziza; Andrew Rambaut; Catherine Pratt; Eddy Kinganda-Lusamaki; Edith Nkwembe; Emmanuel Lokilo Lofiko; Francisca Muyembe Mawete; Ian Goodfellow; James Hadfield; Jean Claude Makangara; Jean-Claude Makangara Cigolo; Jean-Jacques Muyembe Tamfum; Josh Quick; Kristian Andersen; Matthias Pauthner; Michael Wiley; Nick Loman; Placide Mbala-Kingebeni; Steve Ahuka-Mundeke; Trevor Bedford                                                                                                                                                                                                                                                                                                                          |
| EPI_ISL_526840, EPI_ISL_644910                                                                                                                                                                                                                                                                                                                                   | Virginia DCLS                                                                                                                                                                                   | Virginia DCLS                                                                                                                                                                                                                                             | Virginia DCLS                                                                                                                                                                                                                                                                                                                                                                                                                                                                                                                                                                                                                                                                                                                              |
| EPI_ISL_1095413, EPI_ISL_1095446, EPI_ISL_1110845                                                                                                                                                                                                                                                                                                                | Virginia Division of Consolidated Laboratory Services                                                                                                                                           | Virginia Division of Consolidated Laboratory Services                                                                                                                                                                                                     | Virginia DCLS                                                                                                                                                                                                                                                                                                                                                                                                                                                                                                                                                                                                                                                                                                                              |
| EPI_ISL_734211                                                                                                                                                                                                                                                                                                                                                   | Virginia Division of Consolidated Laboratory Services (DCLS)                                                                                                                                    | Virginia Division of Consolidated Laboratory Services (DCLS)                                                                                                                                                                                              | Virginia DCLS                                                                                                                                                                                                                                                                                                                                                                                                                                                                                                                                                                                                                                                                                                                              |
| EPI_ISL_650495                                                                                                                                                                                                                                                                                                                                                   | Virology Department, Royal Infirmary of Edinburgh, NHS Lothian / School of Biological Sciences, University of Edinburgh / Institute of Genetics and Molecular Medicine, University of Edinburgh | COVID-19 Genomics UK (COG-UK) Consortium                                                                                                                                                                                                                  | Balcaza C; Colquhoun R; Dewar R; Gallagher M; Hill V; Jackson B; McCrone JT; McHugh M; O'Toole Á; Rambaut A; Rooke S; Scher E; Templeton K; Williams TC; Yu X                                                                                                                                                                                                                                                                                                                                                                                                                                                                                                                                                                              |
| EPI_ISL_636987                                                                                                                                                                                                                                                                                                                                                   | Virology Lab, National Institute for Biomedical Research (INRB)                                                                                                                                 | Project group Epidemiology of Highly Pathogenic Microorganisms, Robert Koch-Institute                                                                                                                                                                     | Eddy Kinganda-Lusamaki; Essia Belarbi; Fabian Leendertz; Gabriel Mbunso; Grit Schubert; Jasmin Schlotterbeck; Jean-Jacques Muyembe Tamfum; Sheila Makiala; Steve Ahuka-Mundeke                                                                                                                                                                                                                                                                                                                                                                                                                                                                                                                                                             |
| EPI_ISL_625456, EPI_ISL_677635                                                                                                                                                                                                                                                                                                                                   | Virology Unit, Institut Pasteur de Madagascar                                                                                                                                                   | Virology Unit, Institut Pasteur de Madagascar                                                                                                                                                                                                             | Cara Brook; Cara E. Brook; Christian Ranaivoson; Cristina M. Tato; Helisoa Razafimanjato; Jean-Michel Heraud; Joseph L. DeRisi; Michelle Tan; Norosoa Razanajatovo; Philippe Dussart; Soa Fy Andriamandimby; Tsiry Randriambolamanantsoa; Vida Ahyong; Vololoniaina Raharinosy                                                                                                                                                                                                                                                                                                                                                                                                                                                             |
| EPI_ISL_918362, EPI_ISL_918369, EPI_ISL_918370, EPI_ISL_918373, EPI_ISL_918376, EPI_ISL_933780, EPI_ISL_933781, EPI_ISL_1098606                                                                                                                                                                                                                                  |                                                                                                                                                                                                 |                                                                                                                                                                                                                                                           |                                                                                                                                                                                                                                                                                                                                                                                                                                                                                                                                                                                                                                                                                                                                            |
| see above                                                                                                                                                                                                                                                                                                                                                        | Virology Unit, Institut Pasteur du Cambodge                                                                                                                                                     | Virology Unit, Institut Pasteur du Cambodge                                                                                                                                                                                                               | Chau Darapheak; Chin Savuth; Erik A Karlsson; Etienne Simon-Loriere; Kraing Sidonn; Ly Sovann; Sokhoun Yann; Veasna Duong; Yi Sengdoeurn                                                                                                                                                                                                                                                                                                                                                                                                                                                                                                                                                                                                   |
| EPI_ISL_411902                                                                                                                                                                                                                                                                                                                                                   | Virology Unit, Institut Pasteur du Cambodge.                                                                                                                                                    | Virology Unit, Institut Pasteur du Cambodge (Sequencing done by: Jessica E Manning/Jennifer A Bohl at Malaria and Vector Research Research Laboratory, National Institute of Allergy and Infectious Diseases and Vida Ahyong from Chan-Zuckerberg Biohub) | Erik A Karlsson; Jennifer A Bohl; Jessica E Manning.; Philippe Dussart; Veasna Duong; Vida Ahyong                                                                                                                                                                                                                                                                                                                                                                                                                                                                                                                                                                                                                                          |
| EPI_ISL_467666                                                                                                                                                                                                                                                                                                                                                   | Virology lab, NIC, NCCD, Ulaanbaatar, Mongolia                                                                                                                                                  | National Centre for Communicable Diseases (NCCD)                                                                                                                                                                                                          | Ankhubayar S; Bayasgalan N; Darmaa B; Erdene-Ochir Ts; Naranzul Ts; Nymadawa P; Tsogtbaatar B                                                                                                                                                                                                                                                                                                                                                                                                                                                                                                                                                                                                                                              |
| EPI_ISL_1061414                                                                                                                                                                                                                                                                                                                                                  | Vita Laboratoriot Oy                                                                                                                                                                            | Institute of Biotechnology, DNA Sequencing and Genomics Laboratory, University of Helsinki                                                                                                                                                                | Anne Ylino; Annina Luyski; Ella Mustanoja; Hanna Nihtilä; Jukka Hurme; Lars Paulin; Petri Auvinen; Pia Laine; Sakari Jokiranta; Taru Meri                                                                                                                                                                                                                                                                                                                                                                                                                                                                                                                                                                                                  |
| EPI_ISL_722201                                                                                                                                                                                                                                                                                                                                                   | Vitalis Mostar                                                                                                                                                                                  | Alea Genetic Center                                                                                                                                                                                                                                       | Korjhozdic R.; Pecar D.; Salihfendic L.                                                                                                                                                                                                                                                                                                                                                                                                                                                                                                                                                                                                                                                                                                    |
| EPI_ISL_427308, EPI_ISL_733243, EPI_ISL_733464, EPI_ISL_872943, EPI_ISL_1036272                                                                                                                                                                                                                                                                                  | WHO National Influenza Centre Russian Federation                                                                                                                                                | WHO National Influenza Centre Russian Federation                                                                                                                                                                                                          | Andrey Komissarov; Anna Ivanova; Artem Fadeev; Daria Danilenko; Dmitry Bazhenov; Dmitry Liznov; Elena Nabieva; Georgii Bazykin; Ksenia Safina; Kseniya Komissarova; Maria Pisareva; Maria Timofeeva; Maria Sergeeva; Mikhail Bakaev; Tamila Mauseva; Veronika Eder                                                                                                                                                                                                                                                                                                                                                                                                                                                                         |
| EPI_ISL_860811, EPI_ISL_860814                                                                                                                                                                                                                                                                                                                                   | WHO/Minsk                                                                                                                                                                                       | Charité Universitätsmedizin Berlin, Institut für Virologie                                                                                                                                                                                                | Barbara Mühlemann; Christian Drosten; Julia Schneider; Julia Tesch; Jörn Beheim-Schwarzbach; Shmialiova Natallia; Sivets Natallia; Talitha Veith; Terry Jones; Tobias Bleicker; Victor M Corman                                                                                                                                                                                                                                                                                                                                                                                                                                                                                                                                            |
| EPI_ISL_903645                                                                                                                                                                                                                                                                                                                                                   | WVDHHR - Office of Laboratory Services                                                                                                                                                          | Genomics and Discovery, Respiratory Viruses Branch, Division of Viral Diseases, Centers for Disease Control and Prevention                                                                                                                                | Anna Montmayeur; Anna Uehara; Ben L. Rambo-Martin; Clinton R. Paden; Dhvani Batra; Haibin Wang; Jasmine Padilla; Jing Zhang; Justin Lee; Krista Queen; Lori Rowe; Mark Burroughs; Mili Sheth; Peter W. Cook; Rachel Marine; Sarah Nobles; Suxiang Tong; Yan Li; Ying Tao                                                                                                                                                                                                                                                                                                                                                                                                                                                                   |
| EPI_ISL_734293                                                                                                                                                                                                                                                                                                                                                   | Wadsworth Center, New York State Department.of Health                                                                                                                                           | Wadsworth Center, New York State Department.of Health                                                                                                                                                                                                     | Alexis Russel; Daryl M. Lamson; Erasmus Schneider; Erica Lasek-Nesselquist; John Kelly; Jonathan Plitnick; Kirsten St. George; Navjot Singh; Sara Griesemer                                                                                                                                                                                                                                                                                                                                                                                                                                                                                                                                                                                |
| EPI_ISL_548101, EPI_ISL_649124, EPI_ISL_707794                                                                                                                                                                                                                                                                                                                   | Waikato Hospital                                                                                                                                                                                | Institute of Environmental Science and Research (ESR)                                                                                                                                                                                                     | Anja Werno; Antje van der Linden; Arlo Upton; Chris Mansell; David Hammer; Dragana Drinkovic; Erasmus Smit; Gary McAuliffe; Hana Sofia Andersson; Hermes Perez; James Ussher; Jill Sherwood; Jing Wang; Joep de Lig; Josh Freeman; Julia Howard; Juliet Elvy; Lauren Jelly; Mary DeAlmeida; Matt Blakiston; Matt Storey; Matthew Rogers; Max Bloomfield; Michael Addidle; Michelle Balm; Muhammad Faisal; Nikki Freed; Olin Silander; Sally Roberts; Sarah Jefferies; Sharmini Muttaiyah; Susan Morpeth; Susan Taylor; Timothy Blackmore; Vani Sathyendran; Veronica Playle; Virginia Hope; Xiaoyun Ren                                                                                                                                    |
| EPI_ISL_577476, EPI_ISL_822645                                                                                                                                                                                                                                                                                                                                   | Wales Specialist Virology Centre Sequencing lab: Pathogen Genomics Unit                                                                                                                         | COVID-19 Genomics UK (COG-UK) Consortium                                                                                                                                                                                                                  | Alec Birchley; Alexander Adams; Amy Gaskin; Angela Marchbank; Bree Gatica-Wilcox; Catherine Moore; Jason Coombes; Joanne Watkins; Joel Southgate; Johnathan Evans; Laura Gifford; Lauren Gilbert; Lee Graham; Malorie Perry; Matthew Bull; Nicole Pacchiarini; Sally Corden; Sara Kumziene-Summerhayes; Sara Rey; Sarah Taylor; Simon Cottrell; Sophie Jones; Tom Connor                                                                                                                                                                                                                                                                                                                                                                   |
| EPI_ISL_1011634                                                                                                                                                                                                                                                                                                                                                  | Warrior Diagnostics Laboratory                                                                                                                                                                  | Infectious Disease Program, Broad Institute of Harvard and MIT                                                                                                                                                                                            | Adams G.; B.L.; B.W.; Bauer, M.; Birren; Bronson, A.; Carter, A.; Chaluvaadi, S.; D.J.; DeRuff, K.; Gallagher, G.; Gladden-Young, A.; J.E.; K.J.; Lagerberg, K.; Lemieux; Loreth, C.; MacInnis; Marshall, J.; Normandin, E.; ONEill, M.; P.C.; Park; Reilly, S.; Rudy, M.; Siddle; Smole, S.; Tomkins-Tinch, C.; and                                                                                                                                                                                                                                                                                                                                                                                                                       |

|                                                                                                                                                                                                                                                                |                                                                                              |                                                                                                                         | Sabeti                                                                                                                                                                                                                                                                                                                                                                                                                                                                                                                                                                                                                                                                                                                                                                                                                         |
|----------------------------------------------------------------------------------------------------------------------------------------------------------------------------------------------------------------------------------------------------------------|----------------------------------------------------------------------------------------------|-------------------------------------------------------------------------------------------------------------------------|--------------------------------------------------------------------------------------------------------------------------------------------------------------------------------------------------------------------------------------------------------------------------------------------------------------------------------------------------------------------------------------------------------------------------------------------------------------------------------------------------------------------------------------------------------------------------------------------------------------------------------------------------------------------------------------------------------------------------------------------------------------------------------------------------------------------------------|
| EPI_ISL_771362                                                                                                                                                                                                                                                 | Washington State Department of Health                                                        | Seattle Flu Study                                                                                                       | Amanda Adler; Barry R. Lutz; Benjamin Pelle; Brian Hiatt; Caitlin R. Wolf; Chris D. Frazier; Deborah A. Nickerson; Elisabeth Brandstetter; Geoff Melly; Helen Y. Chu; Janet A. Englund; Jay Shendure; Jover Lee; Kairsten Fay; Kirsten Lacombe; Lea M. Starita; Mark J. Rieder; Matthew Richardson; Matthew Thompson; Melissa Truong; Michael Boeckh; Michael Famulare; Misja Ilicsin; Peter D. Han; Philip Dykema; Romesh Gautom; Scott Lindquist; Thomas R. Sibley; Trevor Bedford                                                                                                                                                                                                                                                                                                                                           |
| EPI_ISL_476021, EPI_ISL_610157                                                                                                                                                                                                                                 | Washington University in St. Louis                                                           | Washington University in St. Louis                                                                                      | Bijal Parikh; Carey-Ann Burnham; David Wang; Lindsay Droit; Scott Handley; Stephen Tahan                                                                                                                                                                                                                                                                                                                                                                                                                                                                                                                                                                                                                                                                                                                                       |
| EPI_ISL_456169, EPI_ISL_456320, EPI_ISL_456337                                                                                                                                                                                                                 | Wellington SCL                                                                               | Institute of Environmental Science and Research (ESR)                                                                   | Anja Werno; Antje van der Linden; Arlo Upton; Chris Mansell; David Hammer; Dragana Drinkovic; Erasmus Smit; Gary McAuliffe; Hana Sofia Andersson; James Ussher; Jill Sherwood; Joep de Ligt; Josh Freeman; Julia Howard; Juliet Elvy; Lauren Jelly; Mary DeAlmeida; Matt Blakiston; Matt Storey; Matthew Rogers; Max Bloomfield; Michael Addidle; Michelle Balm; Sally Roberts; Sarah Jefferies; Sharmini Muttaiyah; Susan Morpeth; Susan Taylor; Timothy Blackmore; Vani Sathyendran; Veronica Playle; Virginia Hope; Xiaoyun Ren                                                                                                                                                                                                                                                                                             |
| EPI_ISL_579420, EPI_ISL_637085, EPI_ISL_649123, EPI_ISL_649125, EPI_ISL_1016878                                                                                                                                                                                | Wellington SCL (WN)                                                                          | Institute of Environmental Science and Research (ESR)                                                                   | Anja Werno; Antje van der Linden; Arlo Upton; Chris Mansell; David Hammer; Dragana Drinkovic; Erasmus Smit; Gary McAuliffe; Hana Sofia Andersson; Hermes Perez; James Ussher; Jill Sherwood; Jing Wang; Joep de Ligt; Josh Freeman; Julia Howard; Juliet Elvy; Lauren Jelly; Mary DeAlmeida; Matt Blakiston; Matt Storey; Matthew Rogers; Max Bloomfield; Michael Addidle; Michelle Balm; Muhammad Faisal; Nikki Freed; Olin Silander; Sally Roberts; Sarah Jefferies; Sharmini Muttaiyah; Susan Morpeth; Susan Taylor; Timothy Blackmore; Vani Sathyendran; Veronica Playle; Virginia Hope; Xiaoyun Ren                                                                                                                                                                                                                       |
| EPI_ISL_451361                                                                                                                                                                                                                                                 | West China Hospital of Sichuan University                                                    | State Key Laboratory of Biotherapy of Sichuan University                                                                | Baowen Du; Binwu Ying; Chao Tang; Chuan Chen; Hancheng Wei; Jia Geng; Jing-wen Lin; Lu Chen; Mingxia Yu; Minjin Wang; Weimin Li; Yongzhao Zhou                                                                                                                                                                                                                                                                                                                                                                                                                                                                                                                                                                                                                                                                                 |
| EPI_ISL_408670                                                                                                                                                                                                                                                 | Wisconsin Department of Health Services                                                      | Pathogen Discovery, Respiratory Viruses Branch, Division of Viral Diseases, Centers for Diseases Control and Prevention | Anna Uehara; Brett L. Whitaker; Brian Lynch; Clinton R. Paden; Janna' R. Murray; Jing Zhang; Krista Queen; Lijuan Wang; Senthil Kumar K. Sakhivel; Shifaq Kamili; Stephen Lindstrom; Susan I. Gerber; Suixiang Tan; Xiaoyun Lu; Yan Li; Ying Tao                                                                                                                                                                                                                                                                                                                                                                                                                                                                                                                                                                               |
| EPI_ISL_803427, EPI_ISL_803491                                                                                                                                                                                                                                 | Wisconsin State Laboratory of Hygiene Communicable Disease Division                          | Wisconsin State Laboratory of Hygiene Communicable Disease Division                                                     | Abigail C. Shockey; Kelsey R. Florek                                                                                                                                                                                                                                                                                                                                                                                                                                                                                                                                                                                                                                                                                                                                                                                           |
| EPI_ISL_708812, EPI_ISL_708813                                                                                                                                                                                                                                 | World Medical Hospital                                                                       | National Institute of Health, Department of Medical Sciences, Ministry of Public Health, Thailand                       | Malinee Chittaganpitch; Pakorn Piromtong; Pilailuk Okada; Siripaporn Phuygun; Sittiporn Parmnen; Sunthareeya Waicharoen; Thanutsapa Thanadachakul; Warawan Wongboot                                                                                                                                                                                                                                                                                                                                                                                                                                                                                                                                                                                                                                                            |
| EPI_ISL_765942                                                                                                                                                                                                                                                 | Worobey Lab, Department of Ecology and Evolutionary Biology, University of Arizona           | Worobey Lab, Department of Ecology and Evolutionary Biology, University of Arizona                                      | Brendan Larsen; David Baltrus; Grace Quirk; Michael Worobey; Thomas Watts                                                                                                                                                                                                                                                                                                                                                                                                                                                                                                                                                                                                                                                                                                                                                      |
| EPI_ISL_402124                                                                                                                                                                                                                                                 | Wuhan Jinyintan Hospital                                                                     | Wuhan Institute of Virology, Chinese Academy of Sciences                                                                | Ding-Yu Zhang; Hao-Rui Si; Lei Zhang; Peng Zhou; Xing-Lou Yang; Yan Zhu; Zhengli Shi                                                                                                                                                                                                                                                                                                                                                                                                                                                                                                                                                                                                                                                                                                                                           |
| EPI_ISL_770066, EPI_ISL_770456, EPI_ISL_779135, EPI_ISL_826298, EPI_ISL_856934, EPI_ISL_1008393, EPI_ISL_1036650, EPI_ISL_1039744                                                                                                                              | Wyoming Public Health Laboratory                                                             | Wyoming Public Health Laboratory                                                                                        | Ashley Norberg; Bailey Bowcutt; Channing Weber; Lynette Gumbleton; Noah Hull; Taylor Fearing; and Wanda Manley                                                                                                                                                                                                                                                                                                                                                                                                                                                                                                                                                                                                                                                                                                                 |
| EPI_ISL_718074, EPI_ISL_770713                                                                                                                                                                                                                                 | ZOTZ KLIMAS MVZ Düsseldorf-Centrum GbR ÜBAG für Labormedizin, Genetik, Zytologie, Pathologie | Center of Medical Microbiology, Virology, and Hospital Hygiene, University of Duesseldorf                               | Alexander Dilthey; Andreas Walker; Ashley-Jane Duplessis; Daniel Strelow; Jessica Nicolai; Jörg Timm; Katrin Hoffmann; Klaus Pfeffer; Lisanna Hülse; Malte Kohns Vasconcelos; Marek Korencak; Maximilian Damagnez; Nadine Lübke; Patrick Finzer; Rainer Zotz; Tobias Wienemann; Torsten Houwaart                                                                                                                                                                                                                                                                                                                                                                                                                                                                                                                               |
| EPI_ISL_660069, EPI_ISL_660070, EPI_ISL_681702, EPI_ISL_1013779, EPI_ISL_1014102, EPI_ISL_1014238                                                                                                                                                              | Zurita & Zurita Laboratorios                                                                 | Zurita & Zurita Laboratorios                                                                                            | Camilo Zurita-Salinas; Gabriela Sevillano; Gabriela Sevillano Camilo Zurita-Salinas Karen Loaiza David Ortega-Paredes Jeannete Zurita; Jeannete Zurita                                                                                                                                                                                                                                                                                                                                                                                                                                                                                                                                                                                                                                                                         |
| EPI_ISL_845620                                                                                                                                                                                                                                                 | compensar calle 63                                                                           | Instituto Nacional de Salud - Dirección de Investigación en Salud Pública                                               | Carlos Franco-Muñoz; Diego A. Álvarez-Díaz; Diego Andrés Prada; Gerardo Santamaría; Jonathan Reales; Julian Naizaque; Katherine Laiton-Donato; Magdalena Wiesner; Marcela Mercado-Reyes; María T. Herrera-Sepúlveda; Martha Lucia Ospina Martínez; Mauricio Pacheco-Montealegre; Paola Muñoz-Laiton; Sheryll Corchuelo                                                                                                                                                                                                                                                                                                                                                                                                                                                                                                         |
| EPI_ISL_826991, EPI_ISL_827145, EPI_ISL_827319, EPI_ISL_827689, EPI_ISL_827896, EPI_ISL_827897, EPI_ISL_827922, EPI_ISL_828300, EPI_ISL_828873, EPI_ISL_829052, EPI_ISL_829325, EPI_ISL_829428, EPI_ISL_829566, EPI_ISL_829588, EPI_ISL_829969, EPI_ISL_830126 | see above                                                                                    | deCODE genetics                                                                                                         | Agnar Helgason; Alma Moller; Arna B Agustsdottir; Arnaldur Gylfason; Asgeir Sigurdsson; Aslaug Jonasdottir; Berglind Eiriksdotir; Bjarni Thorbjornsson; Brynjar O Jenson; Daniel F Gudbjartsson; Droplaug N Magnsdottir; Elisabet E Gardarsdottir; Emil A Thorarensen; Gardar Sveinbjornsson; Gisli Masson; Gudmundur Georgsson; Gudmundur L Norddahl; Gudrun Sigmundsdottir; Hakon Jonsson; Hannes Eggertsson; Hilma Holm; Ingileif Jonsdottir; Jona Saemundsdottir; Kamilla S Josefsdottir; Kari Stefansson; Karl G Kristinsson; Kjartan R Gudmundsson; Kristin E Sveinsdottir; Louise le Roux; Maney Sveinsdottir; Olafia S Gretarsdottir; Olafur T Magnusson; Pall Melsted; Patrick Sulem; Run Fridriksdottir; Solvi Rognvaldsson; Thora R Gunnarsdottir; Thordur Kristjansson; Thorolfur Gudnason; Unnur Thorsteinsdottir |
| EPI_ISL_959411                                                                                                                                                                                                                                                 | genXone SA, Molecular Diagnostics Laboratory / NZOZ                                          | genXone SA, Research & Development Laboratory                                                                           | Aleksandra Gidlewicz; Anna Brylak-Baszaków; Grzegorz Nowicki; Jakub Grabowski; Karol Szeszko; Maciej Sykulski; Micha Kaszuba; Natalia Drwska-Matelska; ukasz Krych                                                                                                                                                                                                                                                                                                                                                                                                                                                                                                                                                                                                                                                             |
| EPI_ISL_1036386                                                                                                                                                                                                                                                | hopital Centre de Biologie humaine CHU Amiens                                                | National Reference Center for Viruses of Respiratory Infections, Institut Pasteur, Paris                                | Angela Brisebarre; Camille Capel; Castelain Sandrine; Etienne Simon-Lorière; Marion Barbet; Maud Vanpeene; Méline Bizard; Sylvie Behillili; Sylvie van der Werf; Vincent Enouf                                                                                                                                                                                                                                                                                                                                                                                                                                                                                                                                                                                                                                                 |
| EPI_ISL_447920                                                                                                                                                                                                                                                 | n/a                                                                                          | National Institute of Health, Department of medical Sciences, Ministry of Public Health, Thailand                       | Chittaganpitch; Malinee; Okada; Parmnen; Phuygun; Pilailuk; Siripaporn; Sittiporn; Sunthareeya; Thanadachakul; Thanutsapa; Waicharoen; Warawan; Wongboot                                                                                                                                                                                                                                                                                                                                                                                                                                                                                                                                                                                                                                                                       |
| EPI_ISL_463001                                                                                                                                                                                                                                                 | unknown                                                                                      | Clinical virology                                                                                                       | Fares, W.; Triki, H.                                                                                                                                                                                                                                                                                                                                                                                                                                                                                                                                                                                                                                                                                                                                                                                                           |
| EPI_ISL_455692                                                                                                                                                                                                                                                 | unknown                                                                                      | Department of Microbiology                                                                                              | Bao, L.; Cai, F.; Deng, W.; Gao, H.; Gao, Q.; Ge, X.; Gong, X.; Hu, Y.; Jiang, D.; Kan, B.; Li, C.; Li, J.; Li, Y.; Liu, J.; Lou, X.; Lu, J.; Lv, Z.; Mao, H.; Qin, C.; Shi, W.; Sun, Y.; Wang, L.; Wang, N.; Wang, X.; Wu, D.; Xu, K.; Yang, M.; Yin, W.; Yin, Y.; Zhang, H.; Zhang, Y.; Zhu, L.                                                                                                                                                                                                                                                                                                                                                                                                                                                                                                                              |
| EPI_ISL_437615, EPI_ISL_437624                                                                                                                                                                                                                                 | unknown                                                                                      | Faculty of Medicine                                                                                                     | Buathong, R.; Bunprakob, S.; Ghai, S.; Joyjinda, Y.; Mungaomklang, A.; Petcharat, S.; Plipat; Prasithsirikul, W.; Rodpan, A.; Sirichan, N.; T. and Hemachudha, T.; Wacharapluesadee, S.                                                                                                                                                                                                                                                                                                                                                                                                                                                                                                                                                                                                                                        |
| EPI_ISL_582515                                                                                                                                                                                                                                                 | unknown                                                                                      | Instituto Nacional de Saude (INSA) and Instituto Gulbenkian de Ciencia (IGC)                                            | Borges et al                                                                                                                                                                                                                                                                                                                                                                                                                                                                                                                                                                                                                                                                                                                                                                                                                   |
| EPI_ISL_434570                                                                                                                                                                                                                                                 | unknown                                                                                      | Microbiology                                                                                                            | K.-Y.; K.K.W. and Yuen; To                                                                                                                                                                                                                                                                                                                                                                                                                                                                                                                                                                                                                                                                                                                                                                                                     |
| EPI_ISL_483060                                                                                                                                                                                                                                                 | unknown                                                                                      | Microbiology, Canterbury Health Laboratories                                                                            | Anderson, T.; Dilcher, M.                                                                                                                                                                                                                                                                                                                                                                                                                                                                                                                                                                                                                                                                                                                                                                                                      |
| EPI_ISL_524786                                                                                                                                                                                                                                                 | Evandro Chagas Institute                                                                     | Evandro Chagas Institute                                                                                                | A.M.; Barbagelata; E.C.; E.M.A.; Ferreira; G.M.R.; H.R.; J.A.; Junior; L.C.; L.S.; M.C.; Martins; P.S.; Resque; Santos; Silva; Sousa; Sousa Junior; Viana; W.D.C.; da Silva                                                                                                                                                                                                                                                                                                                                                                                                                                                                                                                                                                                                                                                    |
